# Supplementary material for: High Resolution Genetic Mapping by Genome Sequencing Reveals Genome Duplication and Tetraploid Genetic Structure of the Diploid Miscanthus sinensis
Source: PLoS One. 2012 Mar 16;7(3):e33821. doi: 10.1371/journal.pone.0033821 (PMC3306302; doi:10.1371/journal.pone.0033821)
Supplement: Table S1 — Composite map and genotype data of the mapping population. (XLS) [file pone.0033821.s001.xls]

## Sheet: Sheet1
Table S1. Composite map and genotype data of the mapping population.
Order	Linkage Group (LG)	Marker Name	Position	Mb111	Mb121	P1	P2	P3	P4	P5	P6	P7	P8	P9	P10	P11	P12	P13	P14	P15	P16	P17	P18	P19	P21	P22	P23	P24	P25	P26	P27	P28	P29	P30	P31	P32	P33	P34	P35	P36	P37	P38	P39	P40	P41	P42	P43	P44	P45
1	LG1	M10597	0	lm	ll	lm	ll	lm	lm	lm	lm	lm	lm	lm	lm	lm	ll	--	lm	lm	lm	lm	lm	lm	lm	lm	lm	ll	lm	ll	lm	lm	lm	ll	lm	ll	ll	ll	lm	ll	ll	lm	lm	ll	lm	ll	lm	ll	ll
2	LG1	M10274	1.01	lm	ll	--	lm	ll	ll	ll	ll	lm	--	ll	--	ll	--	ll	lm	--	--	--	ll	lm	ll	--	lm	lm	ll	lm	ll	lm	--	--	ll	--	--	lm	ll	lm	lm	ll	ll	lm	ll	lm	ll	--	lm
3	LG1	M55765	3.783	nn	np	--	nn	np	np	np	np	np	np	np	np	np	nn	nn	nn	--	--	np	np	np	--	np	np	nn	np	nn	nn	np	np	nn	nn	nn	nn	nn	np	nn	nn	nn	--	nn	np	nn	nn	nn	nn
4	LG1	M68982	4.639	nn	np	nn	nn	np	np	np	np	np	np	np	np	np	--	nn	np	--	--	np	np	np	np	np	np	nn	np	nn	nn	np	--	--	nn	nn	nn	nn	np	nn	nn	nn	np	nn	np	nn	nn	nn	nn
5	LG1	M09626	5.6	nn	np	np	np	nn	nn	nn	nn	nn	nn	nn	nn	nn	np	np	nn	nn	nn	nn	nn	nn	nn	nn	nn	np	nn	np	np	nn	nn	np	np	np	np	np	nn	np	np	np	nn	np	nn	np	np	np	np
6	LG1	M00787	6.137	lm	ll	ll	lm	lm	ll	ll	ll	lm	lm	ll	ll	ll	lm	ll	lm	lm	--	lm	ll	lm	ll	ll	lm	lm	lm	lm	ll	lm	ll	lm	ll	lm	lm	lm	lm	lm	lm	ll	ll	lm	ll	lm	ll	lm	lm
7	LG1	M08439	8.345	nn	np	nn	nn	np	np	np	np	np	nn	np	np	np	nn	nn	np	np	nn	np	np	np	np	np	np	nn	np	nn	nn	np	np	nn	nn	nn	nn	nn	np	nn	nn	nn	np	nn	nn	nn	nn	nn	nn
8	LG1	M06828	8.718	lm	ll	--	ll	lm	lm	lm	--	ll	--	lm	--	lm	--	lm	ll	--	--	ll	lm	ll	lm	ll	ll	ll	lm	ll	lm	ll	--	--	lm	--	ll	ll	ll	ll	ll	lm	lm	ll	lm	ll	lm	ll	ll
9	LG1	M03326	9.452	nn	np	nn	nn	np	np	np	--	np	nn	np	np	np	nn	nn	np	np	nn	np	np	--	np	np	np	nn	np	nn	nn	np	np	nn	nn	nn	nn	nn	np	nn	nn	nn	np	nn	nn	nn	nn	nn	nn
10	LG1	M11429	11.101	lm	ll	ll	lm	ll	ll	ll	ll	lm	lm	ll	ll	ll	lm	ll	--	lm	ll	lm	ll	lm	ll	lm	lm	lm	lm	lm	ll	lm	ll	--	ll	lm	lm	lm	--	lm	lm	ll	ll	--	ll	--	ll	lm	lm
11	LG1	M08944	11.23	hk	hk	hk	hk	hk	hh	hh	hh	hk	hk	hh	hh	hh	kk	hk	hk	hk	--	hk	hh	hk	hh	hh	hk	kk	hk	kk	hk	hk	--	kk	hk	kk	kk	kk	hk	kk	kk	hk	hh	kk	hk	kk	hk	kk	kk
12	LG1	M05055	12.462	nn	np	nn	np	np	np	--	nn	np	--	nn	np	np	nn	nn	np	np	--	np	np	--	np	np	np	nn	np	nn	nn	np	--	nn	nn	nn	nn	nn	np	nn	nn	nn	np	nn	nn	nn	nn	nn	nn
13	LG1	M03222	12.501	nn	np	nn	np	np	np	--	nn	np	--	nn	np	np	nn	nn	np	np	--	np	np	--	np	np	np	nn	np	nn	nn	np	--	nn	nn	nn	nn	nn	np	nn	nn	nn	np	nn	nn	nn	nn	nn	nn
14	LG1	M03532	12.744	nn	np	nn	np	np	np	--	nn	np	--	nn	np	np	nn	nn	np	np	--	np	np	np	np	np	np	nn	np	nn	nn	np	--	nn	nn	nn	nn	nn	np	nn	nn	nn	np	nn	nn	nn	nn	nn	nn
15	LG1	M12369	12.79	nn	np	nn	np	np	np	--	nn	np	--	nn	np	np	nn	nn	np	np	--	np	np	--	np	np	np	nn	np	nn	nn	np	--	nn	nn	nn	nn	nn	np	nn	nn	nn	np	nn	nn	nn	nn	nn	nn
16	LG1	M05441	14.006	nn	np	nn	np	nn	np	--	nn	np	--	nn	np	np	nn	nn	np	np	--	np	np	--	np	np	np	nn	np	nn	nn	np	--	nn	nn	nn	nn	nn	np	nn	nn	nn	np	nn	nn	nn	nn	nn	nn
17	LG1	M00716	14.501	lm	ll	ll	lm	lm	ll	ll	ll	lm	ll	ll	ll	ll	lm	ll	lm	lm	ll	lm	ll	lm	ll	ll	lm	lm	lm	lm	ll	lm	ll	lm	ll	lm	lm	lm	lm	lm	lm	ll	ll	lm	ll	lm	ll	lm	lm
18	LG1	M00510	15.095	lm	ll	lm	ll	ll	lm	lm	lm	ll	--	lm	lm	lm	ll	lm	ll	ll	lm	ll	lm	ll	lm	lm	ll	ll	ll	ll	lm	ll	lm	ll	lm	ll	ll	ll	ll	ll	ll	lm	lm	ll	lm	ll	lm	ll	ll
19	LG1	M02400	15.894	hk	hk	hk	kk	hk	hh	hh	hh	hk	hk	hh	hh	hh	kk	kk	hk	hk	hk	hk	hh	hk	hh	hh	hk	kk	hk	kk	hk	hk	hh	kk	hk	kk	kk	hk	hk	kk	kk	hk	hh	kk	hk	kk	hk	kk	kk
20	LG1	M67630	15.967	lm	ll	lm	ll	ll	lm	lm	lm	ll	--	lm	lm	lm	ll	lm	ll	ll	--	ll	lm	ll	lm	lm	ll	ll	ll	ll	lm	ll	lm	ll	lm	ll	ll	ll	ll	ll	ll	lm	lm	ll	lm	ll	lm	ll	ll
21	LG1	M68470	16.626	nn	np	np	nn	nn	nn	nn	nn	nn	nn	nn	nn	nn	np	--	nn	nn	np	nn	nn	nn	nn	nn	nn	np	nn	--	np	nn	nn	np	--	--	--	np	nn	np	--	np	nn	np	nn	--	--	--	np
22	LG1	M06810	16.92	lm	ll	lm	ll	ll	lm	lm	lm	ll	--	lm	lm	lm	ll	lm	ll	ll	--	ll	lm	ll	lm	lm	ll	ll	ll	ll	lm	ll	lm	--	--	ll	ll	lm	ll	ll	ll	lm	lm	ll	lm	--	lm	ll	ll
23	LG1	M05390	17.722	nn	np	nn	nn	np	np	np	np	np	np	np	np	np	nn	nn	np	np	nn	np	np	np	np	np	np	nn	np	nn	nn	np	np	nn	nn	nn	nn	nn	np	nn	nn	nn	np	nn	nn	nn	nn	nn	nn
24	LG1	M07775	18.732	nn	np	nn	nn	np	np	np	nn	np	np	np	np	np	nn	nn	np	np	nn	np	np	np	np	np	np	nn	np	nn	nn	np	np	nn	np	nn	nn	nn	np	nn	nn	nn	np	nn	nn	nn	nn	nn	nn
25	LG1	M03876	19.119	lm	ll	lm	lm	ll	lm	lm	lm	ll	ll	lm	--	lm	ll	ll	ll	ll	--	ll	lm	ll	lm	lm	ll	ll	ll	ll	lm	ll	lm	ll	lm	--	ll	lm	ll	ll	ll	lm	lm	ll	lm	ll	lm	ll	ll
26	LG1	M71200	19.774	lm	ll	lm	lm	ll	lm	lm	lm	ll	ll	lm	lm	lm	--	ll	ll	--	--	ll	lm	ll	lm	lm	ll	ll	ll	ll	lm	ll	lm	ll	lm	lm	ll	lm	ll	--	ll	lm	lm	ll	lm	ll	lm	ll	ll
27	LG1	M07504	20.032	lm	ll	lm	lm	ll	lm	lm	lm	ll	ll	lm	lm	lm	ll	ll	ll	ll	lm	ll	lm	ll	lm	lm	ll	ll	ll	ll	lm	ll	lm	ll	lm	lm	ll	lm	ll	lm	ll	lm	lm	ll	lm	ll	lm	ll	ll
28	LG1	M04213	20.549	nn	np	np	nn	nn	nn	nn	nn	nn	nn	nn	nn	nn	np	np	nn	nn	np	nn	nn	nn	--	nn	nn	np	nn	np	np	nn	nn	np	--	--	np	np	nn	--	np	np	--	np	np	np	np	np	np
29	LG1	M01294	20.699	nn	np	np	nn	nn	nn	nn	nn	nn	nn	nn	nn	nn	np	np	nn	nn	np	nn	nn	nn	--	nn	nn	np	nn	np	np	nn	nn	np	nn	--	np	np	nn	--	np	np	--	np	np	np	np	np	np
30	LG1	M56040	21.013	hk	hk	hk	hk	hk	kk	kk	--	hk	--	kk	kk	kk	--	hh	hk	hk	--	hk	h-	kk	kk	kk	hk	hh	hk	hh	hk	hk	kk	hh	kk	hk	hh	hk	hk	hh	hh	hk	kk	hh	hk	hh	hk	hh	hh
31	LG1	M73452	21.196	lm	ll	lm	ll	ll	lm	lm	lm	ll	--	lm	lm	lm	--	ll	ll	ll	lm	ll	lm	ll	lm	lm	ll	ll	ll	ll	lm	ll	lm	ll	lm	lm	ll	lm	ll	ll	ll	lm	--	ll	lm	ll	lm	ll	ll
32	LG1	M11883	21.639	lm	ll	ll	lm	lm	ll	ll	ll	lm	lm	ll	ll	ll	--	lm	lm	lm	ll	lm	ll	ll	ll	ll	lm	--	lm	lm	ll	lm	ll	lm	ll	ll	lm	ll	lm	lm	lm	ll	--	lm	ll	lm	ll	lm	lm
33	LG1	M09141	21.889	lm	ll	ll	lm	lm	ll	ll	ll	lm	lm	ll	ll	ll	--	lm	lm	lm	ll	lm	ll	ll	ll	ll	lm	lm	lm	lm	ll	lm	ll	lm	ll	ll	lm	ll	lm	lm	lm	ll	--	lm	ll	lm	ll	lm	lm
34	LG1	M54089	22.63	lm	ll	lm	ll	ll	lm	lm	lm	ll	ll	lm	lm	lm	ll	ll	ll	ll	ll	ll	lm	lm	lm	lm	ll	ll	ll	ll	lm	ll	lm	ll	lm	lm	ll	lm	ll	ll	ll	lm	--	ll	lm	--	lm	ll	ll
35	LG1	M03809	23.493	nn	np	nn	nn	np	np	np	np	np	--	np	np	np	nn	nn	np	np	nn	np	nn	np	np	np	np	nn	np	nn	nn	np	np	--	np	nn	nn	nn	np	nn	nn	nn	--	nn	nn	nn	nn	nn	nn
36	LG1	M63417	23.504	lm	ll	lm	ll	ll	lm	lm	lm	ll	ll	lm	lm	lm	ll	ll	ll	ll	--	ll	lm	--	lm	lm	ll	ll	ll	ll	lm	ll	lm	ll	lm	lm	ll	lm	ll	ll	ll	lm	lm	ll	lm	ll	lm	ll	ll
37	LG1	M01423	24.447	lm	ll	--	lm	ll	lm	ll	lm	lm	lm	lm	lm	lm	lm	lm	ll	--	ll	lm	lm	lm	lm	lm	lm	lm	lm	lm	lm	ll	lm	--	lm	lm	lm	lm	ll	lm	lm	ll	lm	lm	--	ll	lm	lm	lm
38	LG1	M01443	24.964	nn	np	nn	nn	np	np	np	np	np	np	np	np	np	np	nn	np	np	nn	np	nn	np	np	np	np	nn	np	nn	nn	np	np	nn	--	nn	nn	nn	np	nn	nn	nn	np	nn	nn	nn	nn	nn	nn
39	LG1	M12468	24.972	nn	np	nn	nn	np	np	np	--	np	--	np	np	np	np	nn	np	np	nn	np	nn	np	np	np	np	nn	np	nn	nn	--	np	nn	np	nn	nn	nn	np	nn	nn	nn	--	nn	nn	nn	nn	nn	nn
40	LG1	M04318	25.59	nn	np	nn	nn	np	np	np	np	np	np	np	np	np	np	nn	np	np	nn	np	nn	np	np	np	np	nn	np	nn	nn	np	np	--	np	nn	nn	nn	np	nn	nn	nn	np	nn	nn	--	nn	nn	nn
41	LG1	M05313	25.844	lm	ll	lm	ll	ll	lm	lm	lm	ll	ll	ll	lm	lm	ll	ll	ll	ll	lm	ll	lm	lm	lm	lm	ll	ll	ll	ll	lm	ll	lm	ll	lm	lm	ll	lm	ll	lm	ll	lm	lm	ll	ll	ll	lm	ll	ll
42	LG1	M10353	26.496	lm	ll	lm	ll	ll	--	lm	lm	ll	ll	lm	lm	lm	ll	ll	ll	ll	lm	ll	lm	lm	lm	lm	ll	ll	ll	ll	lm	ll	lm	ll	lm	lm	ll	lm	ll	lm	ll	lm	lm	ll	ll	lm	lm	ll	ll
43	LG1	M09015	26.506	lm	ll	lm	lm	ll	lm	lm	lm	ll	ll	lm	lm	lm	ll	lm	ll	ll	lm	ll	lm	lm	lm	lm	ll	lm	lm	lm	lm	ll	lm	lm	lm	lm	lm	lm	ll	lm	lm	lm	lm	--	lm	lm	lm	--	lm
44	LG1	M02921	26.566	nn	np	nn	nn	np	np	np	np	np	np	np	np	np	np	nn	np	np	--	np	nn	np	np	np	np	nn	np	--	nn	np	np	--	np	nn	nn	nn	np	--	--	np	np	nn	--	--	nn	nn	nn
45	LG1	M12463	26.607	lm	ll	lm	ll	ll	lm	lm	lm	ll	ll	lm	lm	lm	ll	ll	ll	ll	lm	ll	lm	lm	lm	lm	ll	ll	ll	ll	lm	ll	lm	ll	lm	lm	ll	lm	ll	lm	ll	lm	lm	ll	ll	lm	lm	ll	ll
46	LG1	M63414	27.281	nn	np	nn	np	np	nn	np	nn	np	np	np	np	np	np	nn	--	np	--	np	nn	np	--	np	np	nn	np	nn	nn	np	np	nn	np	nn	nn	nn	np	nn	nn	nn	np	nn	nn	nn	nn	nn	nn
47	LG1	M05109	27.529	nn	np	nn	nn	np	nn	--	--	np	--	np	--	np	--	nn	np	np	nn	np	nn	np	nn	nn	np	nn	nn	nn	nn	np	--	--	np	nn	nn	nn	np	--	nn	nn	--	nn	nn	nn	nn	nn	nn
48	LG1	M50173	27.897	lm	ll	ll	lm	lm	ll	ll	ll	lm	lm	ll	ll	--	lm	lm	lm	lm	ll	lm	ll	ll	ll	ll	lm	lm	lm	lm	ll	lm	ll	lm	ll	ll	lm	ll	lm	--	lm	ll	ll	lm	lm	lm	ll	lm	lm
49	LG1	M65066	28.472	lm	ll	lm	ll	ll	lm	lm	lm	ll	--	lm	lm	lm	ll	ll	ll	ll	--	ll	lm	lm	lm	lm	ll	ll	ll	ll	lm	ll	lm	ll	lm	lm	ll	lm	ll	lm	ll	lm	--	ll	ll	ll	lm	ll	ll
50	LG1	M04770	29.07	nn	np	nn	np	np	nn	np	np	np	np	np	np	np	np	nn	np	np	nn	np	nn	np	--	np	np	nn	np	nn	nn	np	np	nn	np	nn	nn	nn	np	nn	nn	nn	np	nn	nn	nn	nn	nn	nn
51	LG1	M10963	29.861	lm	ll	lm	ll	ll	lm	lm	lm	ll	ll	lm	ll	lm	ll	ll	ll	ll	--	ll	--	lm	lm	lm	ll	ll	ll	ll	lm	ll	lm	ll	lm	lm	ll	lm	ll	lm	ll	ll	--	ll	ll	ll	lm	ll	ll
52	LG1	M72033	30.324	hk	hk	h-	hk	hk	hk	hh	hh	hk	--	hh	hk	hh	hk	kk	kk	hk	--	hk	hk	hh	hh	hh	hk	kk	kk	kk	hk	hk	hh	kk	hh	--	kk	hk	hk	hk	kk	hk	--	kk	kk	kk	kk	kk	kk
53	LG1	M54764	31.289	lm	ll	ll	lm	lm	ll	ll	ll	lm	lm	ll	ll	ll	lm	lm	lm	--	ll	lm	ll	ll	ll	ll	lm	lm	lm	lm	ll	lm	ll	lm	ll	ll	lm	ll	lm	--	lm	lm	--	lm	lm	--	ll	lm	lm
54	LG1	M73169	31.535	nn	np	nn	np	np	nn	np	np	np	np	np	nn	np	nn	nn	np	--	nn	np	nn	np	np	np	np	nn	nn	nn	nn	np	np	nn	np	nn	nn	nn	np	nn	nn	nn	np	nn	nn	--	nn	nn	nn
55	LG1	M06431	32.083	nn	np	np	nn	nn	np	nn	nn	nn	--	nn	np	nn	nn	np	nn	nn	--	nn	np	nn	nn	nn	nn	np	np	np	np	nn	nn	--	nn	np	np	np	nn	np	np	np	nn	np	np	np	np	np	np
56	LG1	M09498	32.092	lm	ll	ll	--	lm	ll	ll	ll	lm	--	ll	ll	ll	lm	lm	lm	lm	--	lm	ll	ll	ll	ll	lm	lm	lm	lm	ll	lm	ll	lm	ll	ll	lm	ll	lm	ll	lm	--	ll	lm	lm	lm	ll	lm	lm
57	LG1	M10231	32.328	lm	ll	ll	--	lm	ll	ll	ll	lm	--	ll	ll	ll	lm	lm	lm	lm	--	lm	ll	ll	ll	ll	lm	lm	lm	lm	ll	lm	ll	lm	ll	ll	lm	ll	lm	ll	lm	--	ll	lm	lm	lm	ll	lm	lm
58	LG1	M11923	32.558	nn	np	nn	nn	np	nn	np	np	np	np	np	nn	np	np	nn	np	np	nn	np	nn	np	np	np	np	nn	nn	nn	nn	np	np	nn	np	nn	nn	nn	np	nn	nn	nn	np	nn	nn	nn	nn	nn	nn
59	LG1	M03497	32.579	nn	np	nn	nn	np	nn	np	np	np	--	np	nn	np	--	nn	np	np	--	np	nn	--	np	np	nn	nn	nn	nn	nn	--	--	nn	nn	nn	nn	nn	np	nn	--	nn	np	nn	nn	nn	nn	np	nn
60	LG1	M00642	32.678	lm	ll	ll	--	lm	ll	ll	ll	lm	--	ll	ll	ll	lm	lm	lm	lm	--	lm	ll	ll	ll	ll	lm	lm	lm	lm	ll	lm	ll	--	ll	ll	lm	ll	lm	ll	lm	--	ll	lm	lm	--	ll	lm	lm
61	LG1	M54006	33.326	lm	ll	ll	lm	lm	--	--	ll	lm	lm	ll	ll	ll	--	lm	ll	lm	--	lm	ll	ll	ll	ll	lm	lm	lm	lm	ll	lm	--	lm	ll	--	lm	ll	lm	--	--	lm	ll	lm	lm	lm	ll	lm	lm
62	LG1	M70649	33.897	lm	ll	lm	ll	ll	lm	lm	lm	ll	ll	lm	lm	lm	ll	ll	ll	ll	--	ll	lm	lm	lm	lm	ll	ll	ll	ll	lm	ll	lm	ll	lm	lm	ll	lm	ll	lm	ll	ll	lm	ll	ll	ll	lm	ll	ll
63	LG1	M65084	34.908	lm	ll	ll	--	lm	ll	--	--	lm	--	ll	--	ll	--	lm	lm	lm	--	lm	ll	ll	ll	ll	lm	lm	lm	lm	ll	--	ll	lm	ll	ll	lm	ll	lm	--	lm	lm	ll	lm	lm	lm	ll	ll	lm
64	LG1	M65085	35.115	lm	ll	ll	--	lm	ll	--	--	lm	--	ll	--	ll	--	lm	lm	lm	--	lm	ll	ll	ll	ll	lm	lm	lm	lm	ll	--	ll	lm	ll	ll	lm	ll	lm	--	lm	lm	ll	lm	lm	lm	ll	ll	lm
65	LG1	M12231	35.266	nn	np	nn	np	--	nn	nn	nn	--	--	nn	nn	nn	--	np	np	np	nn	np	nn	nn	nn	nn	np	--	np	np	nn	np	nn	--	nn	nn	np	nn	--	nn	np	np	nn	np	np	np	nn	np	np
66	LG1	M72034	36.711	nn	np	nn	np	np	nn	np	np	np	--	np	nn	np	np	nn	nn	np	--	np	nn	np	np	np	np	nn	nn	nn	nn	np	np	nn	np	--	nn	nn	np	nn	nn	nn	--	nn	nn	nn	nn	nn	nn
67	LG1	M72032	37.007	nn	np	nn	np	np	nn	np	np	np	--	np	nn	np	np	nn	nn	np	--	np	nn	np	np	np	np	nn	nn	nn	nn	np	np	nn	np	--	nn	nn	np	nn	nn	nn	--	nn	nn	nn	nn	nn	nn
68	LG1	M64649	37.29	lm	ll	ll	--	ll	lm	lm	lm	ll	ll	lm	lm	lm	ll	ll	ll	ll	ll	ll	lm	lm	lm	lm	ll	ll	ll	ll	lm	ll	lm	ll	lm	--	ll	lm	ll	--	ll	ll	lm	lm	ll	ll	lm	ll	ll
69	LG1	M11179	37.923	lm	ll	lm	lm	ll	lm	--	lm	ll	ll	lm	lm	lm	ll	ll	ll	ll	--	ll	--	lm	lm	ll	ll	ll	ll	ll	lm	ll	--	--	lm	ll	ll	lm	ll	--	ll	ll	ll	ll	ll	ll	lm	ll	ll
70	LG1	M10099	38.011	lm	ll	lm	lm	ll	lm	lm	lm	ll	lm	lm	lm	lm	ll	lm	ll	ll	--	ll	ll	lm	lm	lm	ll	lm	lm	ll	lm	ll	lm	--	--	--	lm	lm	ll	--	ll	lm	--	--	lm	--	lm	ll	lm
71	LG1	M03962	38.0124	lm	ll	--	lm	ll	lm	--	lm	ll	lm	lm	lm	lm	ll	lm	ll	ll	--	ll	--	lm	lm	lm	lm	lm	lm	lm	lm	ll	--	--	lm	lm	lm	lm	ll	--	ll	--	ll	ll	lm	lm	lm	ll	lm
72	LG1	M08180	38.0139	lm	ll	--	--	ll	lm	--	lm	ll	lm	lm	lm	lm	ll	lm	ll	ll	--	ll	--	lm	lm	lm	lm	lm	lm	lm	lm	ll	--	--	lm	lm	lm	lm	ll	--	ll	--	ll	ll	lm	lm	lm	ll	lm
73	LG1	M02314	38.0146	lm	ll	--	lm	ll	lm	--	lm	ll	lm	lm	lm	lm	ll	lm	ll	ll	--	ll	--	lm	lm	lm	lm	lm	lm	lm	lm	ll	--	--	lm	lm	lm	lm	ll	--	ll	--	ll	ll	lm	lm	lm	ll	lm
74	LG1	M06605	38.0156	lm	ll	--	lm	ll	lm	--	lm	ll	lm	lm	lm	lm	ll	lm	ll	ll	--	ll	--	lm	lm	lm	lm	lm	lm	lm	lm	ll	--	--	lm	lm	lm	lm	ll	--	ll	--	ll	ll	lm	lm	lm	ll	lm
75	LG1	M06070	38.0167	lm	ll	--	lm	ll	lm	--	lm	ll	lm	lm	lm	lm	ll	lm	ll	ll	--	ll	--	lm	lm	lm	lm	lm	lm	lm	lm	ll	--	--	lm	lm	lm	lm	ll	--	ll	lm	ll	ll	lm	lm	lm	ll	lm
76	LG1	M72188	38.0756	nn	np	np	np	nn	np	nn	nn	nn	np	nn	np	nn	np	np	nn	nn	--	nn	nn	nn	nn	np	np	np	np	np	np	nn	nn	--	nn	np	np	np	np	np	nn	np	nn	np	np	np	np	nn	np
77	LG1	M03638	38.0765	nn	np	np	np	nn	np	--	nn	nn	--	nn	np	nn	nn	np	nn	nn	--	nn	nn	nn	nn	np	np	np	np	np	np	nn	np	np	nn	np	np	np	np	np	--	--	nn	np	np	np	np	nn	np
78	LG1	M08350	38.0778	nn	np	nn	nn	np	nn	np	--	np	nn	np	nn	np	np	nn	--	np	nn	np	--	np	np	np	--	nn	--	nn	--	np	np	np	np	nn	nn	nn	np	np	np	nn	--	nn	nn	nn	nn	--	nn
79	LG1	M54763	38.0789	nn	np	nn	nn	np	nn	np	np	np	nn	np	nn	np	np	nn	np	np	nn	np	nn	np	np	np	np	nn	nn	nn	nn	np	np	nn	np	nn	nn	nn	np	--	np	nn	np	--	nn	nn	nn	np	nn
80	LG1	M71592	38.1	nn	np	np	nn	nn	np	nn	nn	nn	--	nn	np	nn	np	np	nn	nn	--	nn	nn	nn	nn	np	np	np	np	np	np	nn	nn	np	nn	--	np	nn	nn	--	nn	np	nn	np	np	np	np	nn	np
81	LG1	M04964	38.3	nn	np	np	np	nn	np	nn	nn	nn	np	nn	np	nn	nn	np	nn	nn	np	nn	nn	nn	nn	--	np	np	np	np	np	nn	nn	np	nn	np	np	--	nn	np	nn	np	nn	np	np	np	np	nn	np
82	LG1	M53954	39.01	nn	np	np	nn	nn	np	nn	nn	nn	np	nn	np	nn	--	np	nn	nn	np	nn	nn	nn	nn	np	np	np	np	np	np	nn	--	--	nn	np	np	np	np	np	nn	np	nn	np	np	np	np	nn	np
83	LG1	M53953	39.123	nn	np	np	np	nn	np	nn	nn	nn	np	nn	np	nn	--	np	nn	nn	np	nn	nn	nn	nn	np	np	np	np	np	np	nn	--	--	nn	np	np	np	np	np	nn	np	nn	np	np	np	np	nn	np
84	LG1	M12574	39.336	lm	ll	ll	ll	lm	ll	lm	lm	lm	ll	--	ll	lm	lm	lm	lm	lm	ll	lm	lm	--	lm	ll	lm	lm	lm	lm	ll	lm	lm	ll	lm	ll	lm	ll	lm	ll	lm	lm	--	ll	lm	lm	ll	lm	lm
85	LG1	M09959	39.412	lm	ll	ll	ll	lm	ll	lm	lm	lm	ll	--	ll	lm	lm	lm	lm	lm	ll	lm	lm	--	lm	ll	lm	lm	lm	lm	ll	lm	lm	ll	lm	ll	lm	ll	lm	ll	lm	lm	--	ll	lm	lm	ll	lm	lm
86	LG1	M03702	39.656	lm	ll	ll	ll	lm	ll	lm	lm	lm	ll	--	ll	lm	lm	lm	lm	lm	ll	lm	lm	--	lm	ll	lm	lm	lm	lm	ll	lm	lm	ll	lm	ll	lm	ll	lm	ll	lm	lm	--	ll	--	lm	ll	lm	lm
87	LG1	M64773	40.016	lm	ll	lm	lm	ll	lm	ll	lm	ll	--	lm	lm	lm	lm	ll	ll	ll	--	ll	lm	lm	lm	lm	ll	ll	ll	ll	lm	ll	lm	ll	lm	lm	ll	lm	ll	lm	ll	ll	--	lm	ll	ll	lm	ll	ll
88	LG1	M64774	40.207	lm	ll	lm	lm	ll	lm	ll	lm	ll	--	lm	lm	lm	lm	ll	ll	ll	--	ll	lm	lm	lm	lm	ll	ll	ll	ll	lm	ll	lm	ll	lm	lm	ll	lm	ll	lm	ll	ll	--	lm	ll	ll	lm	ll	ll
89	LG1	M64772	40.561	lm	ll	lm	lm	ll	lm	ll	lm	ll	--	lm	lm	lm	--	ll	ll	ll	--	ll	lm	lm	lm	lm	ll	ll	ll	ll	lm	ll	lm	ll	lm	lm	ll	lm	ll	lm	ll	ll	--	lm	ll	ll	lm	ll	ll
90	LG1	M11930	41.492	lm	ll	--	lm	ll	lm	ll	lm	ll	--	lm	lm	lm	ll	ll	ll	--	--	ll	lm	lm	lm	--	ll	ll	ll	ll	--	ll	--	ll	--	--	ll	--	ll	lm	ll	ll	--	lm	ll	--	lm	ll	ll
91	LG1	M10615	42.217	lm	ll	ll	lm	ll	lm	ll	lm	ll	ll	lm	lm	lm	ll	ll	ll	ll	--	ll	lm	lm	lm	lm	ll	ll	ll	ll	lm	ll	lm	ll	lm	lm	ll	lm	ll	lm	ll	ll	lm	lm	ll	ll	lm	ll	ll
92	LG1	M62516	43.583	lm	ll	ll	--	ll	lm	ll	lm	ll	ll	lm	lm	lm	ll	lm	lm	lm	lm	ll	lm	lm	lm	lm	ll	ll	ll	lm	lm	ll	--	--	lm	lm	ll	lm	ll	lm	ll	lm	lm	lm	ll	ll	lm	--	lm
93	LG1	M70506	44.856	lm	ll	ll	lm	ll	lm	ll	lm	ll	ll	lm	lm	lm	ll	ll	ll	ll	lm	ll	lm	lm	lm	lm	ll	ll	ll	ll	lm	ll	lm	ll	lm	lm	ll	lm	ll	lm	ll	ll	lm	lm	ll	ll	lm	ll	ll
94	LG1	M00398	45.701	lm	ll	ll	--	ll	lm	ll	lm	ll	ll	lm	lm	lm	ll	ll	ll	ll	--	ll	lm	lm	lm	lm	ll	ll	ll	ll	lm	ll	lm	ll	lm	lm	ll	lm	ll	lm	ll	ll	--	lm	ll	ll	lm	ll	ll
95	LG1	M70718	45.849	lm	ll	ll	--	ll	lm	ll	lm	ll	ll	lm	lm	lm	ll	ll	ll	ll	lm	ll	lm	lm	lm	lm	ll	ll	ll	ll	lm	ll	lm	ll	lm	lm	ll	lm	ll	lm	ll	ll	lm	lm	ll	ll	lm	ll	ll
96	LG1	M51964	46.203	lm	ll	ll	lm	ll	lm	ll	lm	ll	ll	lm	lm	lm	ll	ll	ll	ll	lm	ll	lm	lm	lm	lm	ll	ll	ll	ll	lm	ll	lm	ll	lm	lm	ll	lm	ll	lm	ll	ll	lm	lm	ll	ll	lm	ll	ll
97	LG1	M61893	47.043	lm	ll	ll	lm	ll	lm	ll	lm	ll	ll	lm	lm	lm	ll	ll	ll	--	lm	ll	lm	lm	lm	lm	ll	ll	ll	ll	lm	ll	lm	--	lm	lm	ll	lm	--	lm	ll	ll	lm	lm	ll	ll	lm	ll	ll
98	LG1	M53739	48.031	lm	ll	ll	--	ll	lm	ll	ll	ll	ll	lm	lm	lm	ll	ll	ll	ll	lm	ll	lm	lm	lm	lm	ll	ll	ll	ll	lm	ll	lm	ll	lm	lm	ll	lm	ll	lm	ll	ll	lm	lm	ll	ll	lm	ll	ll
99	LG1	M54329	50.322	lm	ll	ll	lm	ll	lm	ll	ll	ll	ll	lm	lm	lm	ll	ll	ll	ll	--	ll	lm	lm	lm	lm	ll	ll	ll	lm	lm	ll	--	ll	lm	lm	ll	--	ll	lm	ll	ll	lm	lm	ll	ll	ll	ll	ll
100	LG1	M02535	51.576	lm	ll	ll	lm	ll	lm	ll	ll	ll	ll	lm	--	--	ll	ll	ll	ll	lm	ll	lm	--	lm	--	ll	ll	ll	ll	ll	ll	lm	ll	lm	lm	ll	lm	ll	--	ll	ll	lm	lm	ll	ll	lm	ll	ll
101	LG1	M69341	54.281	lm	ll	ll	lm	ll	ll	ll	ll	ll	--	lm	lm	lm	ll	ll	ll	ll	ll	ll	lm	lm	lm	lm	ll	ll	ll	lm	lm	ll	lm	ll	lm	lm	ll	lm	ll	lm	ll	ll	lm	ll	ll	ll	lm	ll	ll
102	LG1	M07349	54.996	lm	ll	ll	--	ll	ll	ll	ll	ll	ll	lm	lm	lm	--	ll	ll	ll	ll	ll	lm	lm	lm	lm	ll	ll	ll	lm	lm	ll	--	ll	lm	lm	ll	lm	ll	lm	ll	ll	lm	ll	ll	lm	lm	ll	ll
103	LG1	M63708	56.436	lm	ll	ll	--	ll	ll	ll	ll	ll	ll	lm	lm	lm	ll	ll	ll	ll	ll	ll	lm	lm	lm	lm	ll	ll	ll	lm	lm	ll	ll	ll	--	lm	ll	lm	ll	lm	ll	ll	lm	lm	ll	ll	lm	ll	ll
104	LG1	M61568	60.169	lm	ll	ll	--	ll	ll	ll	ll	ll	--	lm	--	ll	ll	ll	ll	ll	ll	lm	lm	lm	lm	lm	ll	ll	ll	lm	lm	ll	--	ll	lm	lm	ll	lm	ll	lm	lm	ll	lm	ll	ll	ll	lm	ll	ll
105	LG1	M06213	61.249	lm	ll	ll	lm	ll	ll	ll	ll	ll	ll	lm	lm	ll	ll	ll	ll	ll	ll	lm	lm	--	lm	lm	ll	ll	ll	lm	lm	ll	ll	ll	lm	lm	ll	lm	ll	lm	lm	ll	lm	ll	ll	ll	lm	ll	ll
106	LG1	M06708	62.349	lm	ll	ll	lm	ll	ll	ll	ll	ll	ll	lm	lm	ll	ll	ll	ll	ll	--	lm	lm	lm	lm	lm	ll	ll	ll	lm	lm	ll	lm	ll	lm	lm	ll	lm	ll	lm	lm	ll	lm	ll	ll	ll	lm	ll	ll
107	LG1	M57473	62.936	lm	ll	ll	lm	ll	ll	--	--	--	--	lm	lm	ll	ll	--	--	ll	--	lm	lm	lm	lm	lm	ll	ll	ll	lm	lm	ll	lm	--	lm	lm	ll	lm	ll	lm	lm	--	--	ll	ll	--	lm	ll	ll
108	LG1	M04083	63.519	lm	ll	ll	lm	ll	ll	ll	ll	ll	ll	lm	lm	ll	ll	ll	ll	ll	ll	lm	lm	lm	lm	lm	ll	ll	ll	lm	lm	ll	--	ll	lm	lm	ll	lm	ll	lm	lm	ll	lm	ll	ll	ll	lm	ll	ll
109	LG1	M69415	64.305	lm	ll	ll	--	ll	ll	ll	ll	ll	ll	lm	lm	ll	--	ll	ll	ll	ll	lm	lm	lm	lm	lm	ll	ll	ll	lm	lm	ll	lm	ll	lm	lm	ll	lm	ll	lm	lm	ll	lm	ll	ll	ll	lm	ll	ll
110	LG1	M55112	64.98	lm	ll	ll	lm	ll	ll	ll	ll	ll	ll	lm	--	ll	ll	ll	ll	ll	ll	lm	lm	lm	lm	lm	ll	ll	ll	lm	lm	ll	lm	ll	lm	--	ll	lm	ll	lm	lm	ll	lm	ll	ll	ll	lm	ll	ll
111	LG1	M55111	65.056	lm	ll	ll	lm	ll	ll	ll	ll	ll	ll	lm	--	ll	ll	ll	ll	ll	ll	lm	lm	lm	lm	--	ll	ll	ll	lm	lm	ll	lm	ll	--	--	ll	lm	ll	lm	lm	ll	lm	ll	ll	ll	lm	ll	ll
112	LG1	M02414	65.914	lm	ll	ll	lm	ll	ll	ll	ll	ll	ll	lm	lm	ll	ll	ll	ll	ll	ll	--	lm	lm	lm	lm	ll	--	ll	lm	--	ll	ll	ll	lm	lm	ll	lm	ll	lm	lm	lm	--	ll	ll	ll	lm	ll	ll
113	LG1	M07790	66.022	lm	ll	ll	lm	ll	ll	ll	ll	ll	ll	lm	lm	ll	ll	ll	ll	ll	ll	--	lm	lm	lm	lm	ll	--	ll	lm	--	ll	ll	ll	lm	lm	ll	lm	ll	lm	lm	lm	--	ll	ll	ll	lm	ll	ll
114	LG1	M10469	66.794	lm	ll	ll	lm	ll	ll	ll	ll	ll	ll	lm	lm	ll	ll	ll	ll	ll	--	lm	lm	lm	lm	lm	ll	lm	ll	lm	lm	ll	lm	--	lm	lm	ll	lm	ll	--	--	lm	lm	ll	ll	ll	--	ll	ll
115	LG1	M02551	67.879	lm	ll	ll	lm	ll	ll	ll	ll	ll	ll	lm	ll	ll	ll	ll	ll	ll	ll	--	lm	--	lm	lm	ll	lm	ll	--	lm	ll	lm	ll	lm	--	ll	lm	ll	lm	lm	--	lm	ll	ll	ll	--	ll	ll
116	LG1	M08629	68.526	lm	ll	ll	lm	ll	ll	ll	ll	ll	ll	lm	lm	ll	ll	ll	ll	ll	ll	lm	lm	--	lm	lm	ll	lm	ll	lm	lm	ll	lm	ll	lm	lm	ll	lm	ll	lm	lm	--	lm	ll	ll	ll	lm	ll	ll
117	LG1	M06588	68.593	lm	ll	ll	lm	ll	ll	ll	ll	ll	ll	lm	lm	ll	ll	ll	ll	ll	ll	lm	lm	--	lm	lm	ll	lm	ll	lm	lm	ll	lm	ll	lm	lm	ll	lm	ll	lm	lm	--	lm	ll	ll	ll	lm	ll	ll
118	LG1	M10169	69.577	lm	ll	ll	lm	ll	ll	ll	ll	ll	ll	lm	lm	ll	--	ll	ll	ll	ll	lm	lm	lm	lm	ll	ll	lm	ll	lm	lm	ll	--	ll	lm	lm	ll	lm	ll	lm	lm	--	lm	ll	ll	ll	lm	ll	ll
119	LG1	M05062	69.808	lm	ll	ll	lm	ll	ll	ll	ll	ll	ll	lm	lm	ll	ll	ll	ll	ll	ll	lm	--	lm	lm	lm	ll	lm	ll	lm	lm	ll	lm	ll	lm	lm	ll	lm	ll	lm	lm	lm	lm	ll	ll	--	ll	ll	ll
120	LG1	M12670	70.251	lm	ll	ll	lm	ll	ll	ll	ll	ll	ll	lm	lm	ll	--	ll	ll	ll	ll	lm	lm	lm	lm	ll	ll	lm	ll	lm	lm	ll	--	ll	lm	lm	ll	lm	ll	lm	lm	--	lm	ll	ll	ll	lm	ll	ll
121	LG1	M68117	70.712	lm	ll	ll	lm	ll	ll	ll	ll	ll	ll	lm	lm	ll	ll	ll	ll	--	--	lm	lm	lm	lm	lm	ll	lm	ll	lm	lm	ll	lm	ll	lm	lm	ll	lm	ll	--	ll	lm	--	--	ll	ll	lm	ll	ll
122	LG1	M05836	72.172	lm	ll	ll	lm	ll	ll	ll	ll	ll	ll	lm	lm	ll	ll	ll	ll	ll	--	lm	lm	lm	lm	lm	ll	lm	ll	lm	lm	ll	lm	ll	lm	lm	ll	lm	ll	lm	lm	lm	lm	ll	ll	ll	lm	ll	ll
123	LG1	M54692	72.935	lm	ll	--	--	ll	ll	ll	ll	ll	--	lm	--	ll	ll	ll	ll	ll	--	lm	lm	lm	lm	lm	ll	lm	ll	lm	lm	ll	--	ll	lm	lm	ll	lm	ll	lm	lm	lm	lm	ll	ll	ll	lm	ll	ll
124	LG1	M54691	73.174	lm	ll	--	--	ll	ll	ll	ll	ll	--	lm	--	ll	--	ll	ll	ll	--	lm	lm	lm	lm	lm	ll	lm	ll	lm	lm	ll	--	ll	lm	lm	ll	lm	ll	lm	lm	lm	lm	ll	ll	ll	lm	ll	ll
125	LG1	M72050	74.903	lm	ll	ll	lm	ll	ll	ll	ll	ll	--	lm	lm	ll	ll	ll	ll	--	ll	lm	lm	lm	lm	lm	ll	lm	ll	lm	lm	ll	lm	ll	lm	lm	ll	lm	ll	lm	lm	lm	lm	ll	lm	ll	lm	ll	ll
126	LG1	M12294	75.601	lm	ll	ll	lm	ll	lm	ll	ll	ll	ll	lm	lm	lm	ll	ll	ll	ll	--	lm	lm	lm	lm	lm	ll	lm	ll	lm	lm	ll	--	ll	lm	lm	ll	lm	ll	lm	lm	lm	lm	ll	lm	ll	lm	ll	ll
127	LG1	M07596	75.882	lm	ll	ll	lm	ll	lm	ll	ll	ll	ll	lm	lm	lm	ll	ll	ll	ll	--	lm	lm	lm	lm	lm	ll	lm	ll	lm	lm	ll	--	ll	lm	lm	ll	lm	ll	lm	lm	lm	lm	ll	lm	ll	lm	ll	ll
128	LG1	M00710	77.209	lm	ll	ll	lm	ll	ll	ll	ll	ll	--	lm	lm	ll	--	ll	ll	ll	ll	lm	lm	lm	lm	lm	ll	lm	ll	lm	lm	ll	lm	ll	lm	lm	ll	lm	ll	lm	lm	lm	lm	ll	lm	ll	lm	ll	ll
129	LG1	M68436	77.386	lm	ll	ll	--	ll	lm	ll	ll	ll	ll	lm	lm	ll	ll	ll	ll	ll	--	lm	lm	lm	lm	lm	ll	lm	ll	lm	lm	ll	lm	--	lm	lm	ll	lm	ll	lm	lm	lm	--	ll	lm	ll	lm	ll	ll
130	LG1	M54965	78.455	lm	ll	ll	--	ll	--	ll	ll	ll	ll	lm	lm	lm	ll	ll	ll	ll	--	lm	lm	lm	lm	lm	ll	lm	ll	lm	lm	ll	--	ll	lm	lm	ll	lm	ll	lm	lm	lm	lm	ll	lm	ll	lm	ll	ll
131	LG1	M01990	79.501	lm	ll	ll	--	ll	lm	ll	ll	ll	ll	lm	lm	lm	ll	ll	ll	ll	ll	lm	lm	lm	lm	lm	ll	lm	ll	lm	lm	ll	lm	ll	lm	lm	ll	lm	ll	lm	lm	lm	lm	ll	lm	ll	lm	ll	ll
132	LG1	M04432	79.698	lm	ll	ll	lm	ll	lm	ll	ll	ll	ll	lm	lm	lm	ll	ll	ll	ll	ll	lm	lm	lm	lm	lm	ll	lm	ll	lm	lm	ll	lm	ll	lm	lm	ll	lm	ll	lm	lm	lm	--	ll	lm	ll	lm	ll	ll
133	LG1	M12103	80.525	lm	ll	--	lm	ll	lm	--	ll	ll	--	lm	lm	lm	--	ll	ll	ll	ll	lm	lm	lm	lm	lm	ll	lm	ll	lm	lm	lm	lm	ll	lm	lm	ll	lm	ll	--	--	lm	lm	ll	lm	ll	lm	ll	ll
134	LG1	M71398	81.293	lm	ll	ll	lm	ll	lm	ll	ll	ll	--	lm	lm	lm	--	ll	ll	ll	--	lm	lm	lm	lm	lm	ll	lm	ll	lm	lm	ll	lm	--	lm	lm	ll	lm	ll	lm	--	lm	lm	ll	lm	--	lm	ll	ll
135	LG1	M04950	81.618	lm	ll	ll	lm	ll	lm	ll	ll	ll	ll	lm	lm	lm	ll	ll	ll	ll	ll	lm	lm	lm	lm	lm	ll	lm	ll	lm	lm	ll	lm	ll	lm	lm	ll	lm	ll	lm	lm	lm	lm	ll	lm	ll	lm	ll	ll
136	LG1	M61750	81.823	lm	ll	ll	lm	ll	lm	ll	ll	ll	ll	lm	lm	lm	ll	ll	ll	ll	--	lm	lm	lm	lm	lm	ll	lm	ll	lm	lm	ll	lm	ll	lm	lm	ll	lm	ll	lm	lm	lm	--	ll	lm	ll	lm	ll	ll
137	LG1	M03549	82.615	lm	ll	lm	lm	ll	lm	--	--	ll	ll	lm	lm	lm	ll	ll	ll	ll	--	lm	lm	lm	lm	lm	ll	lm	ll	lm	lm	ll	lm	--	lm	lm	--	lm	ll	--	lm	--	lm	ll	lm	ll	lm	ll	ll
138	LG1	M09940	82.679	lm	ll	lm	lm	ll	lm	--	--	ll	ll	lm	lm	lm	ll	ll	ll	ll	--	lm	lm	lm	lm	lm	ll	lm	ll	lm	lm	ll	lm	--	lm	lm	--	lm	ll	--	lm	--	lm	ll	lm	--	--	ll	ll
139	LG1	M09729	83.17	lm	ll	lm	--	ll	lm	ll	ll	ll	ll	lm	lm	lm	ll	ll	ll	ll	ll	lm	lm	lm	lm	lm	ll	lm	ll	lm	lm	ll	lm	ll	lm	lm	ll	lm	ll	lm	lm	lm	lm	ll	lm	ll	lm	ll	ll
140	LG1	M71736	83.692	lm	ll	lm	--	ll	lm	ll	ll	ll	ll	lm	lm	lm	ll	ll	ll	ll	--	lm	lm	lm	lm	lm	ll	lm	ll	lm	lm	ll	--	ll	lm	lm	ll	lm	ll	lm	lm	lm	--	ll	lm	ll	lm	ll	ll
141	LG1	M73325	83.893	lm	ll	lm	--	ll	lm	ll	ll	ll	ll	lm	lm	lm	ll	ll	ll	ll	--	lm	lm	lm	lm	lm	ll	lm	ll	lm	lm	ll	--	ll	lm	lm	ll	lm	ll	lm	lm	lm	--	ll	lm	ll	lm	ll	ll
142	LG1	M05229	85.284	lm	ll	lm	lm	ll	lm	ll	ll	ll	--	lm	lm	ll	--	ll	ll	ll	ll	lm	--	lm	--	lm	ll	lm	ll	lm	--	lm	lm	ll	lm	lm	ll	--	ll	ll	lm	lm	lm	ll	lm	ll	lm	ll	ll
143	LG1	M06106	89.693	lm	ll	lm	lm	ll	lm	ll	ll	ll	lm	ll	lm	lm	ll	ll	ll	ll	ll	lm	lm	lm	ll	lm	ll	lm	ll	lm	lm	lm	lm	ll	lm	--	ll	lm	ll	lm	lm	lm	lm	ll	lm	ll	lm	lm	ll
144	LG1	M12633	90.143	lm	ll	lm	lm	ll	lm	ll	ll	ll	lm	ll	lm	lm	ll	ll	ll	ll	ll	lm	lm	lm	ll	lm	ll	lm	ll	lm	lm	lm	lm	ll	lm	--	ll	lm	ll	lm	lm	lm	lm	ll	lm	ll	lm	lm	ll
145	LG1	M59990	90.583	lm	ll	lm	--	ll	lm	ll	ll	ll	lm	ll	lm	lm	ll	ll	ll	ll	--	lm	lm	lm	ll	lm	ll	lm	ll	lm	lm	lm	lm	ll	lm	lm	ll	lm	ll	lm	lm	lm	--	ll	lm	ll	lm	lm	ll
146	LG1	M59991	90.717	lm	ll	lm	--	ll	lm	ll	ll	ll	lm	ll	lm	lm	ll	ll	ll	ll	--	lm	lm	lm	ll	lm	ll	lm	ll	lm	lm	lm	lm	ll	lm	lm	ll	lm	ll	lm	lm	lm	--	ll	lm	ll	lm	lm	ll
147	LG1	M59993	90.747	lm	ll	lm	--	ll	lm	ll	ll	ll	lm	ll	lm	lm	ll	ll	ll	ll	--	lm	lm	lm	ll	lm	ll	lm	ll	lm	lm	lm	lm	ll	lm	lm	ll	lm	ll	lm	lm	lm	--	ll	lm	ll	lm	lm	ll
148	LG1	M62677	92.215	lm	ll	lm	lm	ll	lm	ll	--	ll	lm	ll	lm	lm	--	ll	ll	--	--	lm	ll	lm	ll	lm	ll	lm	ll	lm	lm	lm	lm	--	ll	lm	ll	lm	lm	lm	lm	lm	lm	ll	ll	ll	lm	lm	ll
149	LG1	M56506	92.825	lm	ll	lm	lm	ll	lm	ll	ll	ll	--	ll	lm	lm	--	ll	ll	ll	--	lm	ll	lm	ll	--	ll	lm	ll	lm	lm	lm	--	ll	lm	lm	ll	lm	lm	lm	lm	lm	lm	ll	lm	ll	lm	lm	ll
150	LG1	M56508	92.898	lm	ll	lm	lm	ll	lm	ll	ll	ll	--	ll	lm	lm	--	ll	ll	ll	--	lm	ll	lm	ll	--	ll	lm	ll	lm	lm	lm	--	ll	lm	lm	ll	lm	lm	lm	lm	lm	lm	ll	lm	ll	lm	lm	ll
151	LG1	M55534	93.784	lm	ll	--	--	ll	lm	ll	--	ll	lm	ll	lm	lm	--	ll	ll	--	--	lm	ll	lm	ll	lm	ll	lm	ll	lm	lm	lm	lm	--	lm	lm	ll	lm	lm	lm	lm	lm	lm	ll	lm	ll	lm	lm	ll
152	LG1	M04341	94.282	lm	ll	lm	lm	ll	lm	ll	ll	ll	lm	ll	lm	--	ll	ll	--	--	--	lm	ll	lm	ll	lm	ll	lm	ll	--	lm	ll	lm	--	lm	--	ll	lm	lm	--	lm	lm	lm	ll	lm	ll	lm	lm	lm
153	LG1	M52574	94.791	lm	ll	lm	lm	ll	lm	ll	ll	ll	lm	ll	lm	lm	ll	ll	ll	ll	--	lm	ll	lm	ll	lm	ll	lm	ll	lm	lm	lm	lm	ll	lm	lm	ll	lm	lm	lm	lm	lm	lm	ll	lm	ll	lm	lm	lm
154	LG1	M72066	95.757	lm	ll	lm	lm	ll	lm	ll	ll	ll	lm	ll	lm	lm	ll	ll	ll	ll	ll	lm	ll	lm	ll	lm	ll	lm	ll	lm	lm	lm	--	ll	lm	lm	ll	lm	lm	lm	lm	lm	--	ll	lm	ll	lm	lm	lm
155	LG1	M01270	96.388	lm	ll	lm	lm	ll	lm	ll	ll	ll	lm	ll	lm	lm	ll	ll	ll	ll	ll	lm	ll	lm	ll	lm	ll	lm	ll	lm	lm	lm	lm	ll	lm	lm	ll	lm	lm	--	ll	lm	lm	ll	lm	ll	lm	lm	lm
156	LG1	M08814	96.451	lm	ll	lm	--	ll	lm	ll	ll	ll	lm	ll	lm	--	ll	ll	ll	ll	ll	lm	ll	lm	ll	lm	ll	lm	ll	lm	lm	--	ll	ll	lm	lm	ll	lm	lm	ll	ll	lm	--	ll	lm	ll	lm	lm	ll
157	LG1	M06085	96.616	lm	ll	--	lm	ll	--	ll	ll	ll	ll	ll	ll	--	ll	ll	ll	ll	ll	lm	ll	lm	ll	lm	ll	lm	ll	--	lm	--	lm	ll	--	lm	ll	lm	lm	lm	lm	--	lm	ll	lm	ll	lm	lm	lm
158	LG1	M03636	96.761	lm	ll	lm	lm	ll	lm	ll	ll	ll	lm	ll	lm	lm	ll	ll	ll	ll	ll	lm	ll	lm	ll	lm	ll	lm	ll	lm	lm	lm	lm	ll	lm	lm	ll	lm	lm	lm	lm	lm	lm	ll	lm	ll	lm	lm	lm
159	LG1	M01370	97.149	lm	ll	lm	lm	ll	lm	ll	ll	ll	lm	ll	lm	lm	--	ll	ll	ll	ll	lm	ll	lm	ll	lm	ll	lm	ll	lm	lm	lm	lm	ll	lm	lm	ll	lm	lm	--	lm	lm	lm	--	lm	lm	lm	lm	lm
160	LG1	M01480	97.501	lm	ll	lm	lm	ll	lm	ll	ll	ll	lm	ll	lm	lm	--	ll	ll	ll	ll	lm	ll	lm	ll	lm	ll	lm	ll	lm	lm	lm	lm	ll	lm	lm	ll	lm	lm	--	lm	lm	lm	ll	lm	ll	lm	lm	lm
161	LG1	M07728	97.523	lm	ll	lm	lm	ll	lm	ll	ll	ll	lm	ll	lm	lm	--	ll	ll	ll	--	lm	ll	lm	ll	lm	ll	lm	ll	lm	lm	lm	lm	ll	lm	lm	ll	lm	lm	--	lm	lm	lm	ll	lm	ll	lm	lm	lm
162	LG1	M10149	97.534	lm	ll	lm	lm	ll	lm	ll	ll	ll	lm	ll	lm	lm	--	ll	ll	ll	ll	lm	ll	lm	ll	lm	ll	lm	ll	lm	lm	lm	lm	ll	lm	lm	ll	lm	lm	--	lm	lm	lm	ll	lm	ll	lm	lm	lm
163	LG1	M68857	97.823	lm	ll	lm	lm	ll	lm	ll	ll	ll	lm	ll	lm	lm	ll	ll	ll	ll	--	lm	ll	lm	ll	lm	ll	lm	ll	lm	lm	lm	lm	ll	lm	lm	ll	lm	lm	lm	lm	lm	lm	ll	lm	ll	lm	lm	lm
164	LG1	M64539	98.078	lm	ll	lm	--	ll	lm	ll	ll	ll	lm	ll	lm	lm	lm	ll	ll	ll	ll	lm	ll	lm	ll	lm	ll	lm	ll	lm	lm	lm	lm	ll	lm	lm	ll	lm	lm	lm	lm	lm	lm	ll	lm	ll	lm	lm	lm
165	LG1	M04696	98.239	lm	ll	lm	lm	ll	lm	ll	ll	ll	lm	ll	lm	lm	ll	ll	ll	ll	ll	lm	ll	lm	ll	lm	ll	lm	ll	lm	lm	lm	--	ll	lm	lm	ll	lm	lm	lm	--	lm	lm	ll	lm	ll	lm	lm	lm
166	LG1	M05377	98.477	lm	ll	lm	lm	ll	--	ll	ll	ll	lm	ll	lm	lm	ll	ll	ll	ll	ll	lm	ll	lm	ll	lm	ll	lm	ll	lm	lm	lm	lm	ll	lm	lm	ll	lm	lm	lm	lm	lm	lm	ll	lm	ll	lm	--	lm
167	LG1	M06547	98.536	lm	ll	lm	--	ll	lm	ll	ll	ll	ll	ll	lm	lm	ll	ll	ll	ll	ll	lm	ll	lm	ll	lm	ll	lm	ll	lm	lm	lm	lm	ll	lm	lm	ll	lm	lm	lm	lm	lm	lm	ll	lm	ll	lm	lm	lm
168	LG1	M02393	98.966	lm	ll	lm	lm	ll	lm	ll	ll	ll	lm	ll	lm	lm	ll	ll	ll	ll	ll	lm	ll	lm	ll	lm	ll	lm	ll	lm	lm	lm	lm	ll	lm	lm	ll	lm	lm	lm	lm	lm	lm	ll	lm	ll	lm	lm	lm
169	LG1	M69068	99.224	lm	ll	lm	--	ll	lm	ll	ll	ll	lm	ll	lm	lm	ll	ll	ll	ll	ll	lm	ll	lm	ll	ll	ll	lm	ll	lm	lm	lm	--	--	lm	lm	ll	lm	lm	--	lm	lm	lm	ll	lm	ll	lm	lm	lm
170	LG1	M62600	99.766	lm	ll	lm	lm	ll	lm	ll	ll	ll	lm	ll	lm	lm	ll	ll	ll	ll	ll	lm	ll	lm	ll	lm	ll	lm	ll	lm	lm	lm	lm	ll	lm	lm	ll	lm	lm	lm	lm	ll	lm	ll	lm	ll	lm	lm	lm
171	LG1	M61957	100.42	lm	ll	lm	--	ll	lm	ll	ll	ll	--	ll	lm	lm	ll	ll	ll	ll	ll	lm	ll	lm	ll	lm	ll	lm	ll	lm	lm	lm	--	ll	lm	lm	ll	lm	lm	lm	--	lm	lm	ll	lm	ll	--	--	lm
172	LG1	M00695	101.236	lm	ll	lm	lm	ll	lm	ll	ll	ll	lm	ll	lm	lm	ll	ll	ll	ll	ll	lm	ll	lm	ll	lm	ll	lm	ll	lm	lm	lm	lm	ll	lm	lm	ll	lm	lm	lm	lm	lm	lm	ll	lm	ll	lm	lm	lm
173	LG1	M04720	101.975	lm	ll	lm	--	ll	lm	ll	ll	ll	--	ll	lm	lm	ll	ll	ll	ll	--	lm	ll	lm	ll	lm	ll	lm	ll	lm	lm	lm	--	ll	lm	lm	ll	lm	lm	lm	lm	lm	--	ll	lm	ll	--	lm	lm
174	LG1	M10849	102.946	lm	ll	lm	lm	ll	lm	ll	ll	ll	lm	ll	lm	lm	ll	ll	ll	ll	ll	lm	ll	lm	ll	lm	ll	lm	ll	lm	lm	lm	ll	ll	lm	lm	ll	lm	lm	--	lm	lm	lm	ll	lm	ll	lm	lm	lm
175	LG1	M04034	103.257	lm	ll	--	ll	ll	lm	ll	ll	ll	lm	ll	--	lm	--	ll	ll	ll	--	lm	ll	lm	ll	lm	ll	lm	ll	lm	lm	lm	--	ll	lm	lm	ll	lm	lm	--	lm	lm	lm	ll	lm	ll	lm	lm	lm
176	LG1	M00244	103.829	lm	ll	lm	lm	ll	lm	ll	ll	ll	--	ll	lm	lm	ll	ll	ll	ll	--	lm	ll	lm	ll	lm	ll	lm	ll	lm	lm	lm	lm	ll	lm	lm	ll	lm	lm	ll	--	lm	lm	lm	lm	lm	lm	lm	lm
177	LG1	M11934	104.285	lm	ll	--	ll	ll	lm	ll	ll	ll	--	ll	lm	lm	ll	ll	ll	ll	ll	lm	ll	--	ll	lm	ll	lm	ll	lm	lm	lm	lm	ll	lm	lm	ll	lm	lm	ll	lm	lm	lm	ll	lm	ll	--	lm	lm
178	LG1	M09061	104.975	lm	ll	lm	ll	ll	lm	ll	ll	ll	lm	ll	lm	lm	ll	ll	ll	ll	ll	lm	ll	--	ll	lm	ll	lm	ll	lm	lm	lm	lm	ll	lm	lm	ll	lm	lm	ll	lm	lm	lm	ll	lm	ll	lm	lm	lm
179	LG1	M03693	105.505	lm	ll	lm	lm	ll	lm	ll	ll	ll	lm	ll	lm	lm	ll	ll	ll	ll	ll	lm	ll	lm	ll	lm	ll	lm	ll	lm	lm	lm	lm	ll	lm	lm	ll	lm	lm	ll	lm	lm	--	ll	lm	ll	lm	lm	lm
180	LG1	M07949	105.719	lm	ll	lm	lm	ll	lm	ll	ll	ll	lm	ll	lm	lm	ll	ll	ll	ll	ll	lm	ll	lm	ll	lm	ll	lm	ll	lm	lm	lm	lm	ll	lm	lm	ll	lm	lm	ll	lm	lm	--	ll	lm	ll	lm	lm	lm
181	LG1	M00512	105.857	lm	ll	lm	ll	ll	lm	ll	ll	ll	lm	ll	lm	lm	ll	ll	ll	ll	ll	lm	ll	lm	ll	lm	ll	lm	ll	lm	lm	lm	lm	ll	lm	lm	ll	lm	lm	ll	lm	lm	--	ll	lm	ll	lm	lm	lm
182	LG1	M00198	106.369	lm	ll	lm	lm	ll	lm	ll	ll	ll	lm	ll	lm	lm	ll	ll	ll	ll	ll	lm	ll	lm	ll	lm	ll	lm	ll	--	lm	lm	lm	ll	lm	lm	ll	lm	lm	ll	lm	lm	ll	ll	lm	ll	lm	lm	lm
183	LG1	M11761	106.883	lm	ll	lm	lm	ll	lm	ll	ll	ll	--	ll	lm	lm	ll	ll	ll	ll	ll	lm	ll	lm	ll	lm	ll	lm	ll	lm	lm	lm	lm	ll	lm	lm	ll	lm	lm	ll	lm	lm	ll	ll	lm	ll	lm	lm	lm
184	LG1	M53973	107.024	lm	ll	lm	lm	ll	lm	ll	ll	ll	lm	ll	lm	lm	ll	ll	ll	ll	--	lm	ll	lm	ll	lm	ll	lm	ll	lm	lm	lm	lm	ll	lm	lm	ll	lm	lm	ll	lm	lm	ll	ll	lm	ll	lm	lm	lm
185	LG1	M00395	107.639	lm	ll	lm	--	ll	lm	ll	ll	ll	--	ll	lm	lm	ll	ll	ll	ll	ll	lm	ll	lm	ll	--	ll	lm	ll	lm	lm	lm	--	ll	lm	lm	ll	lm	lm	ll	lm	--	ll	ll	lm	--	lm	lm	lm
186	LG1	M04605	107.739	lm	ll	lm	ll	ll	lm	ll	ll	ll	--	ll	lm	lm	ll	ll	ll	ll	ll	lm	ll	lm	ll	--	ll	lm	ll	lm	lm	lm	--	ll	lm	lm	ll	lm	lm	ll	lm	lm	ll	ll	lm	lm	lm	lm	lm
187	LG1	M52081	108.153	lm	ll	lm	ll	ll	lm	ll	ll	ll	--	ll	lm	lm	--	ll	ll	ll	--	lm	ll	lm	ll	lm	ll	lm	ll	lm	lm	lm	lm	ll	lm	lm	ll	lm	lm	ll	lm	lm	ll	ll	lm	ll	lm	lm	lm
188	LG1	M03241	108.607	lm	ll	--	ll	ll	lm	ll	ll	ll	lm	ll	lm	lm	ll	ll	ll	ll	ll	lm	ll	--	ll	lm	ll	lm	ll	lm	lm	lm	lm	ll	lm	lm	ll	lm	lm	--	lm	lm	ll	ll	lm	ll	lm	--	lm
189	LG1	M00205	108.913	lm	ll	lm	ll	ll	ll	ll	ll	ll	--	ll	lm	lm	ll	ll	ll	ll	ll	lm	ll	lm	ll	lm	ll	ll	ll	lm	lm	lm	lm	ll	lm	lm	ll	lm	lm	ll	lm	lm	ll	ll	lm	ll	lm	ll	lm
190	LG1	M00556	109.345	lm	ll	--	ll	ll	ll	ll	ll	ll	--	ll	lm	lm	--	ll	ll	ll	ll	lm	ll	lm	ll	lm	ll	lm	ll	lm	lm	lm	lm	--	lm	lm	ll	lm	lm	--	lm	lm	ll	ll	lm	lm	lm	--	lm
191	LG1	M03432	109.568	lm	ll	lm	ll	ll	lm	ll	ll	ll	lm	ll	lm	lm	ll	ll	ll	ll	ll	lm	ll	--	ll	lm	ll	lm	ll	lm	lm	lm	lm	ll	lm	lm	ll	lm	lm	ll	lm	lm	ll	ll	lm	--	lm	--	lm
192	LG1	M03186	109.887	lm	ll	lm	ll	ll	ll	ll	ll	ll	lm	ll	lm	lm	ll	ll	ll	ll	ll	lm	ll	lm	ll	lm	ll	lm	ll	lm	lm	lm	lm	ll	lm	lm	ll	lm	lm	ll	lm	lm	ll	ll	lm	ll	lm	--	lm
193	LG1	M09350	110.29	lm	ll	lm	lm	ll	lm	ll	ll	ll	lm	ll	lm	lm	ll	ll	ll	ll	--	lm	ll	lm	ll	lm	ll	lm	ll	lm	lm	lm	lm	--	--	lm	ll	lm	lm	ll	lm	lm	ll	ll	lm	ll	lm	lm	lm
194	LG1	M56036	110.674	lm	ll	lm	ll	ll	lm	ll	ll	ll	lm	ll	lm	lm	ll	ll	ll	ll	--	lm	ll	lm	ll	lm	ll	lm	ll	lm	lm	lm	lm	ll	lm	ll	ll	lm	lm	ll	lm	lm	ll	ll	lm	ll	lm	lm	lm
195	LG1	M10974	111.074	lm	ll	lm	ll	ll	lm	ll	ll	ll	--	ll	lm	lm	ll	ll	ll	ll	--	lm	ll	lm	ll	lm	ll	lm	ll	lm	lm	lm	lm	--	--	lm	ll	lm	lm	ll	lm	lm	ll	ll	lm	ll	lm	lm	lm
196	LG1	M62792	111.595	lm	ll	lm	ll	ll	lm	ll	ll	ll	lm	ll	lm	lm	ll	ll	ll	ll	ll	lm	ll	lm	ll	lm	ll	lm	ll	lm	lm	lm	lm	ll	lm	lm	ll	lm	lm	ll	lm	lm	ll	ll	lm	ll	lm	lm	lm
197	LG1	M62793	111.914	lm	ll	--	ll	ll	lm	ll	ll	ll	lm	ll	lm	lm	ll	ll	ll	ll	ll	lm	ll	lm	ll	lm	ll	lm	ll	lm	lm	lm	lm	ll	lm	lm	ll	lm	lm	ll	lm	lm	ll	ll	lm	ll	lm	lm	lm
198	LG1	M00444	112.052	lm	ll	lm	ll	ll	lm	ll	ll	ll	lm	ll	--	lm	ll	ll	ll	ll	ll	lm	ll	--	ll	lm	ll	lm	ll	lm	lm	lm	lm	ll	lm	lm	ll	lm	lm	ll	lm	lm	ll	ll	lm	ll	lm	lm	lm
199	LG1	M09083	112.668	lm	ll	lm	ll	ll	lm	ll	ll	ll	--	ll	lm	lm	ll	ll	ll	ll	ll	lm	ll	lm	ll	ll	ll	lm	ll	lm	lm	lm	lm	ll	--	ll	ll	lm	lm	ll	lm	--	ll	ll	ll	ll	lm	--	lm
200	LG1	M65082	113.064	lm	ll	lm	lm	ll	lm	ll	ll	ll	lm	ll	lm	lm	ll	ll	ll	--	--	lm	ll	lm	ll	lm	ll	lm	ll	lm	lm	lm	--	--	ll	lm	ll	lm	lm	ll	--	lm	ll	ll	--	--	--	lm	lm
201	LG1	M02152	113.553	lm	ll	lm	lm	ll	lm	ll	ll	ll	lm	ll	lm	lm	--	ll	ll	ll	ll	lm	ll	lm	ll	lm	ll	lm	ll	lm	lm	lm	lm	ll	lm	lm	ll	lm	lm	ll	--	lm	ll	ll	lm	ll	lm	lm	lm
202	LG1	M61680	114.172	lm	ll	ll	ll	ll	--	ll	ll	ll	lm	ll	lm	lm	ll	ll	ll	ll	ll	lm	ll	lm	ll	lm	ll	lm	ll	lm	lm	lm	lm	ll	lm	lm	ll	lm	lm	ll	lm	lm	ll	ll	lm	ll	lm	lm	lm
203	LG1	M61681	114.46	lm	ll	ll	ll	ll	lm	ll	ll	ll	lm	ll	lm	lm	ll	ll	ll	ll	ll	lm	ll	lm	ll	lm	ll	lm	ll	lm	lm	lm	lm	ll	lm	lm	ll	lm	lm	ll	lm	lm	ll	ll	lm	ll	lm	lm	lm
204	LG1	M04366	115.092	lm	ll	lm	ll	ll	lm	ll	ll	ll	lm	ll	lm	lm	ll	ll	ll	ll	--	lm	ll	lm	ll	lm	ll	lm	ll	lm	lm	lm	lm	--	lm	lm	ll	lm	lm	ll	lm	lm	ll	ll	lm	ll	lm	lm	lm
205	LG1	M64741	115.671	lm	ll	lm	lm	ll	lm	ll	ll	ll	--	ll	lm	lm	ll	ll	ll	ll	ll	lm	ll	ll	ll	--	ll	--	ll	lm	lm	lm	lm	ll	lm	ll	ll	lm	lm	ll	--	--	ll	ll	lm	ll	--	ll	lm
206	LG1	M07987	116.254	lm	ll	lm	ll	ll	lm	ll	ll	ll	lm	ll	lm	lm	ll	ll	ll	ll	--	lm	ll	lm	ll	lm	ll	lm	ll	ll	lm	lm	lm	ll	lm	lm	ll	lm	lm	--	lm	lm	ll	--	lm	ll	lm	lm	lm
207	LG1	M59940	116.397	lm	ll	lm	lm	ll	lm	ll	ll	ll	lm	ll	lm	lm	ll	ll	ll	ll	--	lm	ll	lm	ll	lm	ll	lm	ll	ll	lm	lm	--	--	lm	lm	ll	lm	lm	ll	lm	lm	ll	ll	lm	ll	lm	lm	lm
208	LG1	M61727	117.296	lm	ll	lm	ll	ll	--	ll	ll	ll	lm	ll	lm	lm	ll	ll	ll	ll	ll	lm	ll	lm	ll	lm	ll	lm	ll	ll	lm	--	lm	ll	lm	lm	ll	lm	lm	ll	lm	lm	ll	ll	lm	ll	lm	lm	lm
209	LG1	M00927	118.041	lm	ll	lm	ll	lm	lm	ll	ll	ll	lm	ll	lm	--	ll	ll	ll	ll	ll	lm	ll	lm	ll	lm	ll	lm	ll	ll	lm	lm	lm	ll	lm	lm	ll	lm	lm	ll	lm	lm	ll	ll	lm	ll	lm	lm	lm
210	LG1	M53259	118.501	lm	ll	lm	ll	lm	lm	ll	ll	ll	lm	ll	lm	lm	ll	ll	ll	ll	--	lm	ll	ll	ll	--	ll	lm	ll	ll	lm	lm	lm	--	lm	lm	ll	lm	lm	ll	lm	lm	ll	ll	lm	ll	lm	lm	lm
211	LG1	M69093	118.933	lm	ll	lm	ll	lm	lm	ll	ll	ll	ll	ll	lm	lm	ll	ll	ll	--	--	lm	ll	lm	ll	lm	ll	lm	ll	ll	lm	lm	lm	ll	lm	lm	ll	lm	lm	--	lm	lm	ll	ll	lm	ll	lm	lm	lm
212	LG1	M69092	119.035	lm	ll	lm	ll	lm	lm	ll	ll	ll	ll	ll	lm	lm	ll	ll	ll	--	ll	lm	ll	lm	ll	lm	ll	lm	ll	ll	lm	lm	lm	ll	lm	lm	ll	lm	lm	--	lm	lm	ll	ll	lm	ll	lm	lm	lm
213	LG1	M03414	119.711	lm	ll	lm	lm	lm	lm	ll	ll	ll	lm	ll	lm	lm	ll	ll	ll	ll	ll	lm	ll	lm	ll	lm	ll	lm	ll	ll	lm	lm	lm	ll	lm	lm	ll	lm	lm	ll	lm	--	ll	ll	lm	ll	lm	lm	lm
214	LG1	M11397	120.754	lm	ll	lm	ll	ll	lm	ll	ll	ll	lm	ll	lm	lm	ll	ll	ll	ll	ll	lm	ll	lm	ll	--	ll	lm	ll	ll	lm	lm	--	ll	lm	--	ll	lm	lm	ll	--	--	ll	ll	lm	ll	lm	--	lm
215	LG1	M04085	121.865	lm	ll	lm	ll	lm	--	ll	ll	ll	lm	ll	lm	lm	ll	ll	ll	ll	--	lm	ll	lm	ll	lm	ll	lm	ll	ll	lm	lm	--	ll	lm	lm	ll	lm	lm	ll	--	lm	ll	ll	--	ll	lm	lm	lm
216	LG1	M08414	124.452	lm	ll	lm	lm	lm	lm	ll	ll	ll	lm	ll	lm	lm	ll	ll	ll	ll	ll	lm	ll	lm	ll	lm	ll	lm	ll	ll	lm	lm	lm	--	lm	ll	ll	lm	lm	ll	lm	lm	ll	lm	lm	ll	lm	lm	lm
217	LG1	M08466	125.508	lm	ll	lm	ll	lm	lm	ll	--	ll	lm	ll	lm	lm	ll	ll	ll	ll	ll	lm	ll	--	ll	lm	ll	lm	ll	ll	lm	lm	--	lm	lm	ll	ll	lm	lm	--	lm	lm	ll	lm	--	lm	lm	lm	lm
218	LG1	M73393	126.399	lm	ll	lm	ll	--	lm	ll	ll	ll	ll	ll	lm	--	ll	ll	ll	ll	--	lm	ll	lm	ll	lm	ll	lm	ll	ll	lm	--	lm	lm	lm	ll	ll	lm	lm	ll	--	lm	ll	--	lm	ll	lm	--	lm
219	LG1	M71852	127.136	lm	ll	lm	ll	lm	lm	ll	--	ll	--	ll	lm	lm	--	ll	ll	ll	--	lm	ll	lm	ll	lm	ll	lm	ll	ll	lm	lm	--	lm	lm	ll	ll	lm	lm	--	lm	lm	ll	lm	lm	ll	lm	lm	lm
220	LG1	M00404	127.449	lm	ll	lm	lm	lm	lm	ll	ll	ll	--	ll	lm	lm	ll	ll	ll	ll	--	lm	ll	--	ll	--	ll	lm	ll	ll	lm	lm	--	lm	--	ll	ll	lm	lm	ll	--	lm	ll	lm	lm	--	--	lm	lm
221	LG1	M50979	128.849	lm	ll	lm	lm	lm	lm	ll	ll	ll	--	ll	lm	lm	--	ll	ll	ll	--	lm	ll	lm	ll	lm	ll	lm	ll	ll	ll	lm	lm	lm	lm	--	ll	lm	lm	ll	lm	lm	--	lm	lm	ll	lm	lm	lm
222	LG1	M50980	129.655	lm	ll	lm	ll	lm	lm	ll	ll	ll	--	ll	lm	lm	--	ll	ll	ll	--	lm	ll	lm	ll	lm	ll	lm	ll	ll	ll	lm	lm	lm	lm	--	ll	lm	lm	ll	lm	lm	--	lm	lm	ll	lm	lm	lm
223	LG1	M52721	130.676	lm	ll	lm	lm	lm	lm	ll	ll	ll	lm	ll	lm	lm	ll	ll	ll	ll	ll	lm	ll	lm	ll	--	ll	lm	ll	ll	ll	lm	--	lm	lm	ll	ll	lm	lm	ll	lm	lm	ll	lm	lm	ll	lm	lm	lm
224	LG1	M70632	132.089	lm	ll	lm	ll	lm	lm	ll	ll	ll	--	ll	lm	lm	ll	ll	ll	ll	ll	lm	ll	lm	ll	lm	ll	lm	ll	ll	ll	lm	--	ll	lm	ll	ll	lm	lm	ll	lm	lm	ll	lm	lm	ll	--	lm	lm
225	LG1	M70634	132.297	lm	ll	lm	ll	lm	lm	ll	ll	ll	--	ll	lm	lm	ll	ll	ll	ll	ll	lm	ll	lm	ll	lm	ll	lm	ll	ll	ll	lm	lm	ll	lm	ll	ll	lm	lm	ll	lm	lm	ll	lm	lm	ll	--	lm	lm
226	LG1	M02780	132.921	lm	ll	lm	ll	lm	lm	ll	ll	ll	--	ll	lm	lm	ll	ll	ll	ll	--	lm	ll	lm	ll	lm	ll	lm	ll	ll	ll	lm	--	--	lm	ll	ll	lm	lm	ll	lm	lm	ll	lm	lm	ll	lm	ll	lm
227	LG2	M08834	0	lm	ll	lm	ll	lm	lm	ll	lm	lm	lm	ll	lm	ll	lm	ll	lm	ll	lm	lm	lm	lm	lm	lm	lm	lm	ll	lm	ll	lm	lm	lm	ll	lm	lm	lm	lm	lm	lm	ll	ll	lm	lm	lm	lm	lm	lm
228	LG2	M03932	0.209	nn	np	np	np	np	--	nn	nn	nn	np	nn	nn	nn	nn	nn	np	nn	--	np	np	nn	np	np	np	nn	nn	nn	nn	np	np	--	nn	np	np	nn	nn	np	np	nn	nn	np	np	np	nn	nn	np
229	LG2	M00675	0.841	nn	np	np	np	np	--	nn	nn	nn	np	nn	nn	nn	nn	nn	np	nn	--	np	np	nn	np	np	np	nn	nn	nn	nn	np	np	--	nn	np	np	nn	nn	np	--	nn	nn	np	np	np	nn	nn	np
230	LG2	M00549	3.4	lm	ll	lm	lm	lm	lm	ll	lm	--	ll	ll	ll	ll	ll	ll	lm	ll	--	lm	lm	ll	ll	lm	lm	lm	ll	ll	ll	lm	lm	lm	ll	lm	lm	lm	ll	--	lm	ll	--	lm	lm	--	lm	lm	lm
231	LG2	M50814	3.485	nn	np	--	nn	np	nn	nn	nn	nn	--	nn	nn	nn	nn	nn	nn	nn	nn	np	np	nn	np	np	np	nn	nn	--	nn	np	--	--	nn	np	np	np	np	np	--	nn	nn	np	np	np	--	nn	--
232	LG2	M52866	5.485	lm	ll	ll	lm	lm	--	ll	lm	lm	lm	ll	lm	ll	ll	ll	lm	ll	--	--	lm	lm	lm	lm	lm	lm	ll	ll	ll	lm	lm	lm	ll	lm	lm	lm	ll	lm	lm	ll	--	lm	lm	lm	lm	lm	lm
233	LG2	M64507	5.679	nn	np	np	np	np	--	nn	--	nn	--	nn	nn	nn	--	nn	--	--	--	np	np	nn	np	nn	np	nn	nn	--	nn	np	--	--	nn	--	np	nn	np	np	np	nn	nn	np	np	--	np	nn	np
234	LG2	M12492	5.938	lm	ll	lm	--	--	lm	ll	ll	--	lm	ll	lm	ll	lm	ll	lm	ll	--	lm	lm	--	lm	lm	lm	lm	ll	ll	ll	lm	lm	--	ll	lm	lm	lm	ll	lm	lm	ll	ll	--	lm	lm	lm	lm	lm
235	LG2	M67817	6.934	nn	np	np	np	np	np	nn	nn	nn	np	nn	nn	nn	nn	nn	--	nn	nn	np	np	nn	np	np	--	nn	nn	nn	nn	np	np	np	nn	np	np	nn	np	np	np	nn	nn	--	np	np	np	nn	np
236	LG2	M67818	6.989	nn	np	np	np	np	np	nn	nn	nn	np	nn	nn	nn	nn	nn	--	nn	nn	np	np	nn	np	np	--	nn	nn	nn	nn	np	--	np	nn	np	np	--	np	np	np	nn	nn	--	np	np	np	nn	np
237	LG2	M71954	9.346	nn	np	np	nn	np	np	nn	nn	nn	np	nn	nn	nn	nn	nn	np	nn	--	--	np	nn	np	np	np	nn	nn	nn	nn	np	--	np	nn	np	np	--	np	np	np	nn	nn	np	np	np	nn	nn	np
238	LG2	M72496	10.025	hk	hk	h-	kk	hk	hk	kk	hk	hk	--	--	k-	kk	--	kk	hh	--	--	hk	hh	hk	hk	hh	hh	hk	kk	hk	kk	hk	--	--	kk	hh	hh	hh	h-	--	hh	kk	--	hk	hh	hh	--	--	hh
239	LG2	M71953	11.208	nn	np	np	np	np	np	nn	nn	nn	np	nn	nn	nn	nn	nn	np	nn	nn	np	np	nn	np	np	np	nn	nn	nn	nn	np	np	np	nn	np	np	nn	np	np	np	nn	nn	np	np	np	np	nn	np
240	LG2	M00528	12.302	nn	np	np	np	--	nn	np	nn	--	np	np	np	np	np	np	nn	np	nn	np	nn	--	nn	nn	nn	np	np	np	np	--	nn	nn	np	nn	nn	nn	np	nn	nn	np	np	--	nn	nn	nn	--	nn
241	LG2	M60381	12.872	hk	hk	kk	kk	hk	hk	kk	h-	hk	--	kk	hk	kk	kk	kk	hh	kk	h-	hk	hh	hk	hk	h-	hh	hk	kk	hk	kk	hk	hh	hh	kk	hh	hh	hh	hk	hh	hh	kk	kk	hk	hh	hh	hh	hk	hh
242	LG2	M70870	13.326	nn	np	np	nn	np	np	nn	nn	nn	np	nn	nn	nn	nn	nn	np	nn	nn	np	np	nn	np	--	np	nn	nn	np	nn	np	np	np	nn	np	np	np	np	np	np	nn	nn	np	np	np	np	nn	np
243	LG2	M70869	13.398	nn	np	np	nn	np	np	nn	nn	nn	np	nn	nn	nn	nn	nn	np	nn	nn	np	np	nn	np	np	np	nn	nn	np	nn	np	np	np	nn	np	np	np	np	np	np	nn	nn	np	np	np	np	nn	np
244	LG2	M62626	13.448	lm	ll	ll	ll	ll	ll	ll	lm	lm	--	ll	lm	ll	ll	ll	lm	ll	ll	ll	lm	lm	ll	lm	lm	lm	ll	ll	ll	ll	--	lm	ll	lm	lm	lm	ll	lm	lm	ll	ll	ll	lm	ll	lm	--	lm
245	LG2	M54425	13.961	lm	ll	--	ll	ll	ll	ll	--	lm	--	ll	lm	ll	--	ll	--	--	--	ll	--	--	ll	--	lm	lm	ll	--	ll	ll	ll	--	ll	--	lm	lm	ll	--	lm	ll	ll	ll	lm	--	lm	lm	lm
246	LG2	M00639	14.412	nn	np	np	nn	np	--	nn	nn	nn	--	nn	nn	nn	nn	nn	np	nn	--	np	np	nn	np	np	np	nn	nn	nn	nn	np	--	np	nn	np	np	np	np	np	np	nn	--	np	np	--	np	nn	np
247	LG2	M02309	14.76	nn	np	np	np	np	--	nn	nn	nn	--	nn	nn	nn	nn	nn	np	nn	--	np	np	nn	np	np	np	nn	nn	nn	nn	np	--	np	nn	np	np	np	np	np	np	nn	--	np	np	np	np	nn	np
248	LG2	M10977	15.341	lm	ll	--	lm	ll	ll	ll	lm	lm	--	ll	lm	ll	ll	ll	--	--	--	ll	lm	lm	ll	lm	lm	--	ll	ll	ll	ll	--	--	ll	lm	--	lm	ll	--	--	ll	--	--	lm	--	lm	lm	lm
249	LG2	M02558	15.377	lm	ll	--	lm	ll	ll	ll	lm	lm	--	ll	lm	ll	ll	ll	--	--	--	ll	lm	lm	ll	lm	lm	--	ll	ll	ll	ll	--	--	ll	lm	--	lm	ll	--	--	ll	--	--	lm	--	lm	lm	lm
250	LG2	M07972	15.7	hk	hk	hk	hk	hk	hk	h-	--	hk	hk	h-	hk	h-	hk	hk	kk	hk	hk	hk	kk	hk	hk	kk	kk	hk	h-	hk	hk	hk	kk	kk	hk	kk	kk	kk	hk	kk	kk	hk	hh	hk	kk	hk	kk	hk	kk
251	LG2	M07123	15.892	hk	hk	hk	hk	hk	hk	h-	--	hk	hk	h-	hk	hk	hk	hk	kk	hk	hk	hk	kk	hk	hk	kk	kk	hk	h-	hk	hk	hk	kk	kk	hk	kk	kk	kk	hk	kk	kk	hk	hh	hk	kk	kk	kk	hk	kk
252	LG2	M04691	16.278	lm	ll	ll	lm	lm	lm	lm	ll	lm	ll	lm	lm	lm	--	lm	ll	lm	ll	--	ll	--	ll	ll	ll	lm	lm	lm	lm	lm	ll	ll	lm	ll	ll	ll	lm	ll	ll	lm	lm	lm	ll	ll	ll	lm	ll
253	LG2	M71449	16.593	nn	np	np	np	np	np	nn	np	nn	--	nn	nn	nn	nn	nn	np	nn	--	np	np	nn	np	np	np	nn	nn	nn	nn	np	--	nn	nn	np	np	np	nn	np	np	nn	--	np	--	np	np	nn	np
254	LG2	M12638	16.653	lm	ll	lm	lm	lm	lm	lm	ll	lm	lm	lm	lm	lm	lm	lm	ll	lm	lm	lm	ll	lm	ll	ll	ll	lm	lm	lm	lm	--	ll	ll	lm	ll	ll	ll	lm	ll	ll	lm	lm	lm	ll	ll	ll	lm	ll
255	LG2	M67723	17.534	hk	hk	h-	h-	h-	h-	h-	kk	h-	h-	h-	h-	h-	h-	h-	kk	h-	h-	h-	kk	h-	h-	kk	kk	h-	h-	h-	h-	h-	--	kk	h-	kk	kk	kk	h-	--	kk	h-	h-	h-	kk	kk	kk	h-	kk
256	LG2	M03391	18.352	nn	np	np	np	np	np	nn	--	nn	--	nn	nn	nn	--	nn	np	nn	nn	np	np	nn	np	np	np	nn	nn	nn	nn	np	nn	np	nn	nn	np	np	nn	--	np	nn	nn	np	np	np	np	nn	np
257	LG2	M11332	18.396	nn	np	np	np	np	np	nn	--	nn	--	nn	nn	nn	--	nn	np	nn	nn	np	np	nn	np	np	np	nn	nn	nn	nn	np	nn	np	nn	--	np	np	nn	--	np	nn	nn	np	np	np	np	nn	np
258	LG2	M10902	18.517	nn	np	np	np	np	np	nn	--	nn	--	nn	nn	nn	--	nn	np	nn	nn	np	np	nn	np	np	np	nn	nn	nn	nn	np	nn	np	nn	nn	np	np	nn	--	np	nn	nn	np	np	np	np	nn	np
259	LG2	M12341	18.523	nn	np	np	np	np	np	nn	--	nn	--	nn	nn	nn	--	nn	np	nn	nn	np	np	nn	np	np	np	nn	nn	nn	nn	np	nn	np	nn	--	np	np	nn	--	np	nn	nn	np	np	np	np	nn	np
260	LG2	M03609	18.783	lm	ll	ll	lm	ll	ll	ll	lm	lm	ll	ll	lm	ll	ll	ll	lm	ll	lm	ll	lm	lm	ll	lm	lm	lm	ll	ll	ll	ll	lm	--	ll	lm	lm	lm	ll	ll	lm	ll	ll	ll	lm	lm	lm	lm	lm
261	LG2	M00120	20.204	lm	ll	ll	ll	ll	ll	ll	--	lm	ll	ll	lm	ll	ll	ll	lm	ll	lm	ll	lm	lm	ll	lm	lm	lm	ll	ll	ll	ll	lm	lm	ll	lm	lm	lm	ll	lm	--	ll	ll	ll	lm	lm	lm	lm	lm
262	LG2	M00300	20.547	nn	np	np	np	np	np	nn	--	nn	np	nn	nn	nn	--	nn	np	nn	--	np	np	nn	np	np	np	nn	nn	nn	nn	np	--	--	nn	np	np	np	nn	np	np	nn	nn	np	--	np	np	nn	np
263	LG2	M04471	21.089	hk	hk	hk	kk	hk	hk	k-	hh	hk	hk	hk	hk	hk	kk	hk	hh	kk	hk	hk	hh	hk	hk	hh	hh	hk	kk	kk	hk	hk	hh	hh	hk	hh	hh	hh	kk	hh	hh	hk	hk	hk	hh	hh	hh	hk	hh
264	LG2	M05471	21.558	nn	np	np	np	np	np	nn	--	nn	np	nn	nn	nn	--	nn	np	nn	--	np	np	nn	np	np	np	nn	nn	nn	nn	np	--	--	nn	np	np	np	nn	np	np	nn	nn	np	--	np	np	nn	np
265	LG2	M01589	21.93	lm	ll	ll	ll	ll	ll	ll	lm	lm	ll	ll	lm	ll	ll	ll	lm	ll	lm	ll	lm	lm	ll	lm	lm	lm	ll	ll	ll	ll	lm	lm	ll	lm	lm	lm	ll	lm	lm	ll	ll	ll	lm	lm	lm	lm	lm
266	LG2	M01826	22.253	lm	ll	ll	ll	ll	ll	ll	lm	lm	ll	ll	lm	ll	ll	ll	lm	ll	lm	ll	lm	lm	ll	lm	lm	lm	ll	ll	ll	ll	lm	lm	ll	lm	lm	lm	ll	lm	--	ll	ll	ll	lm	lm	lm	lm	lm
267	LG2	M05742	22.365	nn	np	nn	nn	np	np	nn	np	nn	np	nn	nn	nn	nn	nn	np	nn	nn	np	np	nn	np	np	np	nn	nn	nn	nn	np	np	np	nn	np	np	--	nn	np	--	nn	nn	np	np	np	np	nn	np
268	LG2	M57189	23.11	nn	np	nn	nn	np	np	nn	np	nn	--	nn	nn	nn	nn	nn	np	nn	--	np	np	nn	np	np	np	nn	nn	nn	nn	np	nn	np	nn	np	--	--	nn	np	np	nn	--	--	np	np	np	nn	np
269	LG2	M53585	23.379	lm	ll	ll	ll	ll	ll	ll	lm	lm	ll	ll	lm	ll	ll	ll	lm	--	--	ll	lm	lm	ll	lm	lm	lm	ll	ll	ll	ll	lm	lm	ll	lm	lm	lm	ll	lm	lm	ll	ll	ll	lm	lm	lm	lm	lm
270	LG2	M08486	23.88	nn	np	--	nn	np	np	nn	nn	nn	nn	nn	nn	nn	nn	nn	--	nn	nn	np	np	nn	--	np	np	nn	nn	nn	nn	--	np	np	nn	nn	--	nn	nn	np	np	nn	nn	--	nn	--	--	nn	--
271	LG2	M52276	24.077	lm	ll	ll	ll	ll	ll	ll	lm	lm	ll	ll	lm	ll	ll	ll	lm	--	--	ll	--	lm	lm	lm	lm	lm	ll	ll	ll	--	lm	lm	ll	--	lm	lm	ll	lm	lm	ll	ll	ll	lm	lm	lm	lm	lm
272	LG2	M52275	24.132	lm	ll	ll	ll	ll	ll	ll	lm	lm	ll	ll	lm	ll	ll	ll	lm	ll	--	ll	--	lm	lm	lm	lm	lm	ll	ll	ll	ll	lm	lm	ll	--	lm	lm	ll	lm	lm	ll	ll	ll	lm	lm	lm	--	--
273	LG2	M57191	24.795	lm	ll	ll	ll	ll	ll	ll	lm	lm	--	ll	lm	ll	ll	ll	--	ll	--	ll	lm	lm	lm	lm	lm	lm	ll	ll	ll	ll	lm	lm	ll	lm	--	lm	ll	lm	lm	ll	--	--	lm	--	lm	lm	lm
274	LG2	M57190	25.011	lm	ll	ll	ll	ll	ll	ll	lm	lm	--	ll	lm	ll	ll	ll	lm	ll	--	ll	lm	lm	lm	lm	lm	lm	ll	ll	ll	ll	lm	lm	ll	lm	--	lm	ll	lm	lm	ll	--	--	lm	--	lm	lm	lm
275	LG2	M12330	25.147	nn	np	nn	np	np	np	nn	np	nn	np	nn	nn	nn	nn	nn	--	nn	nn	np	np	nn	np	np	np	nn	nn	nn	nn	np	nn	--	nn	np	np	np	nn	np	np	nn	nn	--	np	np	np	nn	np
276	LG2	M70889	26.477	nn	np	nn	nn	np	np	nn	np	nn	np	nn	nn	nn	nn	nn	np	nn	nn	np	np	nn	np	np	np	nn	nn	nn	nn	np	np	np	nn	np	np	np	nn	np	np	nn	nn	np	nn	np	np	nn	np
277	LG2	M02788	27.323	lm	ll	lm	lm	lm	lm	lm	ll	lm	ll	lm	lm	lm	lm	lm	ll	lm	ll	ll	ll	lm	lm	ll	ll	ll	ll	lm	ll	lm	ll	--	lm	ll	ll	ll	lm	ll	ll	lm	ll	ll	lm	lm	lm	lm	lm
278	LG2	M06102	27.402	lm	ll	lm	lm	lm	lm	lm	ll	lm	ll	lm	lm	lm	lm	lm	ll	lm	ll	ll	ll	lm	lm	ll	ll	ll	ll	lm	ll	lm	ll	--	lm	ll	ll	ll	lm	ll	ll	lm	ll	ll	lm	lm	lm	lm	lm
279	LG2	M05487	28.003	lm	ll	lm	lm	lm	lm	lm	ll	lm	ll	lm	lm	lm	lm	lm	ll	lm	ll	ll	ll	lm	lm	ll	ll	ll	ll	lm	ll	lm	ll	--	lm	ll	ll	ll	lm	ll	ll	lm	ll	ll	lm	--	lm	lm	lm
280	LG2	M59917	28.132	lm	ll	lm	ll	ll	ll	ll	--	lm	ll	ll	lm	ll	ll	ll	lm	--	--	ll	lm	lm	lm	lm	--	lm	ll	ll	ll	ll	lm	ll	ll	lm	--	lm	ll	--	lm	ll	ll	ll	lm	ll	ll	lm	lm
281	LG2	M00885	28.675	lm	ll	lm	lm	lm	lm	lm	ll	lm	ll	lm	lm	lm	lm	lm	ll	lm	ll	ll	ll	lm	lm	ll	ll	ll	ll	lm	ll	lm	ll	--	lm	ll	ll	ll	lm	ll	ll	lm	ll	ll	lm	lm	lm	lm	lm
282	LG2	M02757	29.398	lm	ll	ll	lm	lm	lm	lm	lm	ll	ll	lm	ll	ll	lm	lm	lm	ll	ll	lm	lm	ll	ll	lm	lm	lm	lm	lm	lm	ll	--	lm	lm	--	lm	lm	--	--	lm	ll	lm	lm	ll	ll	lm	ll	ll
283	LG2	M09095	30.013	lm	ll	--	lm	lm	--	lm	ll	lm	lm	lm	lm	lm	lm	lm	ll	--	--	ll	ll	lm	ll	ll	ll	ll	ll	lm	ll	lm	ll	--	lm	ll	ll	ll	lm	ll	ll	lm	ll	ll	lm	--	lm	lm	--
284	LG2	M70805	30.688	nn	np	--	np	np	np	nn	np	nn	np	nn	--	nn	--	nn	--	--	--	np	np	nn	np	np	np	np	np	--	np	np	--	np	nn	np	np	np	--	--	np	nn	--	np	nn	np	np	nn	nn
285	LG2	M73184	31.088	lm	ll	--	ll	ll	--	ll	lm	lm	--	ll	lm	ll	--	ll	ll	--	--	ll	lm	lm	ll	lm	--	lm	ll	--	ll	ll	--	--	ll	--	lm	--	ll	lm	lm	ll	ll	ll	lm	--	lm	--	lm
286	LG2	M62201	31.613	nn	np	nn	nn	np	np	nn	np	nn	np	nn	nn	nn	nn	nn	np	nn	nn	np	np	nn	np	np	nn	--	np	nn	--	np	np	np	nn	--	--	nn	nn	np	np	nn	nn	np	nn	np	np	nn	nn
287	LG2	M09712	31.846	lm	ll	lm	lm	--	--	lm	ll	lm	--	lm	lm	lm	lm	lm	ll	ll	--	ll	ll	--	ll	ll	ll	ll	lm	lm	--	ll	--	ll	lm	--	ll	ll	lm	--	ll	lm	lm	ll	lm	ll	lm	ll	lm
288	LG2	M10410	32.284	nn	np	nn	nn	np	np	nn	np	nn	np	nn	nn	nn	nn	nn	np	nn	nn	np	np	nn	np	np	np	np	np	np	np	np	np	np	nn	np	np	--	nn	np	np	nn	nn	np	nn	np	np	nn	nn
289	LG2	M06894	33.188	nn	np	nn	nn	np	np	nn	np	nn	np	nn	nn	nn	nn	nn	np	nn	nn	np	np	nn	np	np	np	np	np	np	np	np	np	np	nn	np	np	--	nn	np	np	nn	nn	np	nn	np	np	nn	nn
290	LG2	M00565	33.341	lm	ll	lm	ll	ll	ll	ll	lm	lm	ll	ll	lm	ll	--	ll	lm	lm	lm	lm	lm	lm	lm	lm	lm	lm	ll	ll	ll	ll	lm	lm	ll	--	lm	lm	ll	lm	--	ll	lm	ll	lm	lm	ll	lm	lm
291	LG2	M08535	34.055	nn	np	nn	nn	np	np	nn	np	nn	--	nn	nn	nn	nn	nn	np	nn	--	--	np	nn	np	np	np	np	np	np	np	np	--	nn	nn	--	np	np	nn	--	np	nn	nn	--	nn	--	nn	nn	nn
292	LG2	M06225	34.561	lm	ll	lm	ll	ll	ll	ll	lm	lm	ll	ll	lm	ll	--	ll	lm	lm	lm	lm	lm	lm	lm	lm	lm	lm	ll	ll	ll	ll	lm	lm	ll	--	lm	lm	ll	lm	--	ll	lm	ll	lm	lm	ll	lm	lm
293	LG2	M00280	35.212	hk	hk	hk	hk	hk	hk	kk	hh	hk	hk	kk	hk	kk	kk	kk	hh	hk	hk	hh	hh	hk	hh	hh	hh	hh	hh	hk	hk	hk	hh	hh	kk	hh	hh	hh	kk	hh	hh	hk	hk	hh	hk	hh	hk	hk	hk
294	LG2	M00953	35.36	hk	hk	hk	hk	hk	hk	hh	kk	hk	hk	hh	hk	hh	hh	hh	kk	hk	hk	kk	kk	hk	kk	kk	kk	kk	kk	hk	hk	hk	kk	kk	hh	kk	kk	kk	hh	kk	kk	hk	hk	kk	hk	kk	hk	hk	hk
295	LG2	M53254	36.096	lm	ll	lm	lm	ll	ll	ll	lm	lm	--	ll	lm	ll	ll	ll	lm	--	--	lm	lm	lm	lm	lm	lm	lm	ll	ll	ll	ll	lm	lm	ll	--	lm	lm	ll	--	lm	ll	--	lm	--	lm	ll	--	lm
296	LG2	M71679	36.407	nn	np	nn	nn	np	np	nn	np	nn	np	nn	nn	nn	--	nn	np	nn	nn	np	np	nn	np	np	np	np	np	np	np	np	np	np	nn	np	np	np	nn	np	np	nn	nn	np	nn	nn	np	nn	nn
297	LG2	M02483	36.624	nn	np	np	np	np	--	nn	nn	nn	--	nn	nn	nn	--	nn	np	--	nn	np	np	nn	np	np	nn	nn	nn	nn	nn	np	np	np	nn	nn	np	--	nn	nn	np	nn	--	np	np	--	np	--	np
298	LG2	M00779	36.896	hk	hk	hk	hk	hk	hk	kk	hk	hk	hk	kk	hk	kk	kk	kk	hk	hk	hh	hk	hh	hk	h-	hk	hk	hh	hk	hk	h-	hk	hk	hh	kk	hh	hh	hh	kk	hh	hh	hh	k-	hh	hk	hh	hh	hk	hk
299	LG2	M06722	36.905	hk	hk	hk	hk	hk	hk	hh	kk	hk	hk	hh	k-	hh	hh	hh	kk	kk	hk	kk	kk	hk	kk	kk	kk	kk	kk	hk	hk	kk	kk	kk	hh	kk	kk	kk	hh	kk	kk	hk	hk	kk	hk	kk	hk	hk	hk
300	LG2	M08192	37.346	lm	ll	lm	lm	lm	--	lm	ll	lm	lm	lm	ll	lm	lm	lm	ll	lm	ll	ll	ll	lm	ll	ll	ll	ll	--	--	ll	lm	--	ll	lm	ll	ll	ll	lm	ll	ll	lm	--	ll	--	ll	lm	lm	lm
301	LG2	M02373	38.923	nn	np	nn	nn	np	np	nn	np	nn	np	nn	nn	nn	nn	nn	np	nn	nn	np	np	nn	--	np	np	np	np	--	np	nn	np	np	nn	np	np	--	nn	np	np	nn	nn	np	nn	np	--	nn	nn
302	LG2	M07573	39.062	nn	np	nn	nn	np	np	nn	np	nn	np	nn	nn	nn	nn	nn	np	nn	nn	np	np	nn	--	np	np	np	np	--	--	nn	np	np	nn	np	np	--	nn	np	np	nn	nn	np	nn	np	--	nn	nn
303	LG2	M07458	39.076	nn	np	nn	nn	np	np	nn	np	nn	np	nn	nn	nn	nn	nn	np	nn	nn	np	np	nn	--	np	np	np	np	--	--	nn	np	np	nn	np	np	--	nn	--	np	nn	nn	np	nn	np	--	nn	nn
304	LG2	M12014	39.503	lm	ll	lm	lm	ll	ll	ll	lm	lm	--	ll	lm	ll	ll	ll	lm	lm	lm	lm	lm	lm	lm	lm	lm	lm	ll	ll	ll	ll	lm	lm	ll	lm	lm	lm	ll	lm	lm	ll	lm	lm	lm	lm	--	lm	lm
305	LG2	M09470	40.008	nn	np	--	nn	np	--	nn	--	nn	--	nn	nn	nn	nn	nn	np	--	--	np	np	nn	np	np	np	np	np	nn	np	nn	--	--	nn	np	np	nn	--	--	np	nn	nn	np	nn	np	--	nn	nn
306	LG2	M62202	40.059	lm	ll	lm	ll	ll	ll	ll	lm	lm	ll	ll	lm	ll	ll	ll	--	lm	lm	lm	lm	--	lm	lm	lm	lm	ll	ll	ll	ll	ll	lm	ll	lm	lm	lm	ll	--	lm	lm	lm	lm	lm	--	ll	lm	--
307	LG2	M10803	40.347	nn	np	nn	nn	np	np	nn	nn	nn	nn	nn	nn	nn	nn	nn	np	nn	nn	np	np	nn	np	np	np	np	np	--	np	nn	np	np	nn	np	np	--	nn	np	--	nn	nn	--	nn	np	--	nn	nn
308	LG2	M01567	41.07	lm	ll	lm	ll	ll	ll	ll	lm	lm	ll	ll	lm	ll	ll	ll	lm	lm	lm	lm	lm	lm	lm	lm	lm	lm	lm	ll	ll	ll	lm	lm	ll	lm	lm	lm	ll	lm	lm	lm	lm	lm	lm	lm	ll	lm	lm
310	LG2	M02327	41.856	hk	hk	hk	hk	hk	hk	kk	hh	hk	hh	kk	hk	hk	kk	kk	hh	hk	h-	hh	hh	hk	hk	hh	hh	hh	hh	hk	hh	hk	hh	hh	hk	hh	hh	hh	kk	hh	hh	hk	hh	hh	hk	h-	hk	hk	hk
309	LG2	M03281	41.856	hk	hk	hk	hk	hk	hk	hh	kk	hk	kk	hh	hk	hk	hh	hh	kk	hk	k-	kk	kk	hk	hk	kk	kk	kk	kk	hk	kk	hk	kk	kk	hk	kk	kk	kk	hh	kk	kk	hk	kk	kk	hk	k-	hk	hk	hk
311	LG2	M04808	44.625	nn	np	np	np	np	nn	nn	np	--	np	np	np	np	np	np	np	np	np	np	np	np	np	np	np	np	np	nn	np	np	np	np	nn	np	np	np	np	nn	np	np	np	np	np	np	nn	np	np
312	LG2	M10349	44.989	lm	ll	lm	lm	ll	ll	ll	lm	lm	--	ll	lm	lm	ll	ll	lm	--	lm	lm	lm	lm	lm	lm	ll	lm	lm	ll	lm	ll	--	--	ll	--	lm	lm	ll	lm	lm	lm	lm	lm	lm	ll	ll	lm	lm
313	LG2	M03818	45.08	nn	np	--	nn	np	--	nn	np	nn	np	nn	nn	nn	--	nn	np	--	--	np	np	nn	np	--	np	np	np	np	np	nn	np	--	nn	np	np	--	nn	--	nn	nn	--	np	--	nn	np	nn	nn
314	LG2	M04124	45.93	lm	ll	lm	ll	ll	ll	ll	lm	lm	ll	ll	lm	lm	ll	ll	lm	lm	lm	lm	lm	lm	lm	lm	lm	lm	lm	ll	ll	lm	lm	--	ll	lm	lm	lm	ll	lm	lm	lm	lm	lm	lm	lm	ll	lm	lm
315	LG2	M04831	46.595	nn	np	nn	nn	np	np	nn	np	nn	np	nn	nn	nn	nn	nn	np	nn	--	np	np	nn	nn	np	np	np	np	np	np	nn	--	np	nn	np	np	np	nn	np	nn	nn	np	np	nn	nn	np	nn	nn
316	LG2	M53722	47.136	lm	ll	lm	ll	ll	ll	ll	lm	lm	--	ll	--	lm	ll	ll	lm	lm	--	lm	lm	lm	lm	lm	lm	lm	lm	ll	ll	lm	--	lm	ll	lm	lm	lm	ll	lm	lm	lm	lm	lm	--	lm	ll	lm	lm
317	LG2	M53721	47.374	lm	ll	lm	ll	ll	ll	ll	lm	lm	--	ll	--	lm	ll	ll	lm	lm	--	lm	lm	lm	lm	lm	lm	lm	lm	ll	ll	lm	--	lm	ll	lm	lm	lm	ll	lm	lm	lm	lm	lm	--	lm	ll	lm	lm
318	LG2	M03009	48.051	nn	np	nn	nn	np	np	nn	np	nn	np	nn	nn	nn	nn	nn	np	nn	--	np	np	nn	nn	np	np	np	np	np	np	nn	nn	np	nn	np	np	np	nn	np	nn	nn	np	np	nn	nn	np	nn	nn
319	LG2	M04260	48.121	nn	np	nn	nn	np	np	nn	np	nn	np	nn	nn	nn	nn	nn	np	nn	--	np	np	nn	nn	np	np	np	np	np	np	nn	nn	np	nn	np	np	np	nn	np	nn	nn	np	np	nn	nn	np	nn	nn
320	LG2	cms13340	48.142	lm	ll	lm	ll	ll	ll	ll	lm	lm	lm	ll	lm	lm	ll	ll	lm	lm	lm	lm	lm	lm	lm	lm	lm	lm	--	--	--	lm	lm	lm	ll	lm	lm	--	--	--	lm	--	--	lm	--	lm	ll	lm	lm
321	LG2	M06348	48.175	nn	np	nn	nn	np	np	nn	np	nn	np	nn	nn	nn	nn	nn	np	nn	--	np	np	nn	nn	np	np	np	np	np	np	nn	nn	np	nn	np	np	np	nn	np	nn	nn	np	np	nn	nn	np	nn	nn
322	LG2	M08908	49.08	lm	ll	lm	ll	ll	ll	ll	lm	lm	lm	ll	lm	lm	ll	ll	lm	lm	lm	lm	lm	lm	lm	lm	lm	lm	lm	ll	lm	lm	lm	--	ll	lm	lm	lm	ll	lm	lm	lm	lm	lm	lm	lm	ll	lm	lm
323	LG2	M00323	49.575	lm	ll	ll	lm	lm	lm	lm	ll	ll	ll	lm	ll	ll	lm	lm	ll	ll	ll	ll	ll	ll	ll	ll	ll	ll	ll	lm	ll	ll	ll	ll	lm	ll	ll	ll	lm	ll	ll	ll	ll	ll	ll	ll	lm	ll	ll
324	LG2	M10216	49.852	hk	hk	hk	hh	hh	hk	hh	kk	hk	k-	hh	hk	hk	hh	hh	hk	hh	kk	hk	kk	k-	hk	kk	kk	hk	hk	hk	hk	hk	kk	kk	hk	hk	hk	hk	hh	hk	kk	hk	kk	kk	hk	hk	hk	hk	hk
325	LG2	M02791	49.974	lm	ll	--	lm	lm	--	lm	lm	ll	lm	lm	--	ll	lm	--	lm	ll	--	lm	--	ll	ll	lm	lm	--	--	lm	--	ll	lm	--	lm	lm	--	--	lm	lm	lm	--	lm	--	--	--	lm	--	--
326	LG2	M02148	50.175	lm	ll	ll	lm	lm	lm	lm	ll	ll	ll	lm	ll	ll	lm	lm	ll	ll	ll	ll	ll	ll	ll	ll	ll	ll	ll	lm	ll	ll	ll	ll	lm	ll	ll	ll	lm	ll	ll	ll	ll	ll	ll	ll	lm	ll	ll
327	LG2	M03345	50.303	nn	np	nn	--	--	np	nn	--	nn	np	nn	nn	nn	nn	nn	np	nn	nn	np	np	nn	nn	--	np	np	np	np	np	nn	np	np	nn	--	--	--	nn	--	np	nn	--	--	nn	nn	np	nn	nn
328	LG2	M03665	50.352	nn	np	nn	--	np	np	np	nn	np	nn	np	np	np	np	np	nn	--	np	nn	nn	np	np	nn	nn	nn	nn	np	nn	np	nn	nn	np	nn	nn	nn	np	--	nn	np	nn	nn	np	np	np	--	np
329	LG2	M00197	50.89	lm	ll	ll	lm	lm	lm	lm	ll	ll	ll	lm	ll	ll	lm	lm	ll	ll	ll	ll	ll	ll	ll	ll	ll	ll	ll	lm	ll	ll	ll	ll	lm	ll	ll	ll	lm	ll	ll	ll	ll	ll	ll	ll	lm	ll	ll
330	LG2	M04227	51.005	nn	np	nn	--	--	np	nn	--	nn	np	nn	nn	nn	nn	nn	np	nn	nn	np	np	nn	nn	--	np	np	np	np	np	nn	np	np	nn	--	--	--	nn	--	np	nn	--	np	nn	nn	np	nn	nn
331	LG2	M61851	51.201	lm	ll	ll	lm	lm	lm	lm	--	ll	ll	lm	ll	ll	lm	lm	ll	ll	ll	ll	ll	ll	ll	ll	ll	ll	ll	lm	ll	ll	ll	ll	lm	ll	ll	ll	lm	ll	--	ll	ll	ll	ll	ll	lm	ll	ll
332	LG2	M53380	51.709	lm	ll	lm	ll	ll	ll	ll	lm	lm	lm	ll	lm	lm	ll	ll	lm	lm	--	lm	lm	lm	lm	lm	lm	lm	lm	ll	lm	lm	lm	lm	ll	lm	lm	lm	ll	lm	lm	lm	lm	lm	lm	lm	ll	lm	lm
333	LG2	M12619	51.849	nn	np	nn	--	np	np	np	nn	np	nn	np	np	np	np	np	nn	--	np	nn	nn	np	np	nn	nn	nn	nn	np	nn	np	nn	nn	np	nn	nn	nn	np	nn	nn	np	nn	nn	np	np	np	--	np
334	LG2	M69362	52.119	lm	ll	ll	lm	lm	lm	lm	ll	ll	ll	lm	ll	ll	lm	lm	ll	ll	--	ll	ll	ll	ll	ll	ll	ll	ll	lm	ll	ll	ll	ll	lm	ll	ll	ll	lm	ll	ll	ll	ll	ll	ll	ll	lm	ll	ll
335	LG2	M11805	52.207	nn	np	--	nn	nn	nn	np	nn	np	nn	np	--	np	--	np	nn	np	nn	nn	nn	np	np	nn	nn	nn	nn	nn	nn	np	nn	--	np	nn	nn	nn	np	nn	nn	np	nn	nn	np	np	nn	np	np
336	LG2	M03899	52.786	lm	ll	ll	lm	lm	lm	lm	ll	ll	ll	lm	ll	ll	lm	lm	ll	ll	ll	ll	ll	ll	ll	ll	ll	ll	ll	lm	ll	ll	ll	ll	lm	ll	ll	ll	lm	ll	ll	ll	ll	ll	ll	ll	lm	ll	ll
337	LG2	M09268	53.359	nn	np	np	nn	nn	nn	np	nn	np	nn	np	np	np	np	np	nn	np	nn	nn	nn	np	np	nn	nn	nn	nn	nn	nn	np	nn	nn	nn	nn	nn	nn	np	nn	nn	np	nn	nn	np	np	nn	np	np
338	LG2	M05919	53.911	lm	ll	lm	ll	ll	ll	ll	lm	lm	ll	ll	lm	lm	ll	ll	lm	lm	--	lm	lm	--	lm	lm	lm	lm	lm	ll	ll	lm	lm	--	ll	lm	lm	lm	ll	lm	lm	lm	ll	lm	--	ll	ll	lm	lm
339	LG2	M53379	54.129	nn	np	nn	nn	np	np	nn	np	nn	np	nn	nn	nn	nn	nn	np	nn	--	np	np	nn	nn	np	np	np	np	np	np	nn	np	np	np	np	np	np	nn	np	np	nn	np	np	nn	nn	np	nn	nn
340	LG2	M03072	55.805	lm	ll	lm	ll	ll	ll	--	lm	lm	ll	lm	lm	lm	ll	lm	--	lm	lm	lm	lm	lm	lm	lm	lm	lm	lm	ll	lm	lm	--	lm	ll	lm	lm	lm	lm	lm	--	lm	lm	lm	lm	lm	ll	lm	lm
341	LG2	M00926	55.892	lm	ll	lm	ll	ll	ll	--	lm	lm	lm	lm	lm	lm	ll	lm	--	lm	lm	lm	lm	lm	lm	lm	lm	lm	--	ll	lm	lm	ll	lm	ll	--	lm	lm	lm	--	--	lm	lm	lm	lm	lm	ll	lm	lm
342	LG2	M06934	56.468	hk	hk	hh	hk	hk	kk	hk	hk	k-	--	hk	--	hh	kk	hk	hk	hk	--	hk	hk	hh	hh	hk	hk	hk	hk	kk	hk	hh	--	hk	kk	hk	hk	hk	hk	hk	hk	hh	hk	hk	hh	hh	k-	hh	hh
343	LG2	M04053	56.904	lm	ll	ll	lm	lm	lm	lm	ll	ll	ll	lm	ll	ll	--	ll	ll	ll	ll	ll	ll	ll	ll	ll	ll	ll	ll	--	ll	ll	ll	ll	lm	ll	ll	ll	ll	ll	ll	ll	ll	ll	ll	ll	lm	ll	ll
344	LG2	M05207	57.317	nn	np	np	nn	nn	nn	np	nn	np	nn	np	np	--	nn	np	nn	np	nn	nn	nn	np	--	nn	nn	nn	nn	nn	nn	np	--	nn	np	nn	nn	nn	np	--	nn	np	--	nn	np	np	nn	np	np
345	LG2	M02675	57.456	lm	ll	lm	ll	ll	ll	ll	lm	lm	--	ll	lm	lm	--	lm	lm	lm	--	lm	lm	lm	lm	lm	lm	lm	lm	ll	lm	lm	lm	--	ll	lm	lm	lm	lm	--	lm	lm	--	lm	lm	lm	ll	lm	lm
346	LG2	M64035	57.741	lm	ll	lm	ll	ll	ll	ll	lm	lm	lm	ll	lm	lm	ll	lm	lm	lm	--	lm	lm	lm	lm	lm	lm	lm	lm	ll	lm	lm	lm	--	ll	lm	lm	lm	lm	lm	lm	lm	lm	lm	lm	--	ll	lm	lm
347	LG2	M01354	57.836	lm	ll	lm	lm	lm	ll	ll	lm	lm	lm	ll	lm	ll	--	lm	lm	lm	--	lm	lm	lm	lm	lm	lm	lm	lm	lm	ll	lm	lm	lm	ll	lm	lm	lm	lm	lm	lm	lm	lm	lm	lm	lm	ll	lm	lm
348	LG2	M11701	57.923	nn	np	np	nn	nn	nn	np	nn	np	nn	np	np	--	nn	np	nn	np	nn	nn	nn	np	--	nn	nn	nn	nn	nn	nn	np	--	nn	np	nn	nn	nn	np	--	nn	np	--	nn	np	np	nn	np	np
349	LG2	M03442	58.229	nn	np	np	--	nn	nn	np	nn	np	nn	np	np	--	nn	np	nn	np	nn	nn	nn	np	--	nn	nn	nn	nn	nn	nn	np	--	nn	np	nn	nn	nn	np	--	nn	np	--	--	np	np	nn	np	np
350	LG2	M70122	58.934	lm	ll	lm	lm	ll	ll	ll	lm	lm	lm	ll	lm	lm	ll	lm	lm	lm	--	lm	lm	lm	lm	lm	lm	lm	lm	ll	lm	lm	lm	--	ll	lm	lm	lm	lm	--	lm	lm	lm	lm	lm	lm	ll	lm	lm
351	LG2	M12000	60.017	hk	hk	hh	kk	hk	kk	hk	hh	hk	hh	hk	hh	hh	kk	hh	hk	hh	hk	hk	hk	hh	hh	k-	hk	hk	hk	kk	hk	hh	--	hh	kk	hk	hk	hk	hh	hk	hk	hh	hk	hk	hh	hh	kk	hh	hh
352	LG2	M01532	60.2378	nn	np	nn	nn	nn	np	nn	np	nn	--	nn	nn	nn	nn	nn	np	nn	--	np	np	nn	nn	np	np	np	np	np	np	nn	np	np	np	np	np	nn	nn	np	np	nn	--	np	nn	nn	np	nn	nn
353	LG2	M02599	60.3067	lm	ll	ll	lm	lm	ll	lm	ll	ll	ll	lm	ll	ll	lm	ll	ll	ll	ll	ll	ll	ll	ll	ll	ll	ll	ll	lm	ll	ll	ll	ll	lm	ll	ll	ll	ll	ll	ll	ll	ll	ll	ll	ll	lm	ll	ll
354	LG2	M05566	60.4165	nn	np	nn	nn	nn	np	nn	np	np	nn	nn	nn	nn	np	nn	np	nn	--	np	np	nn	nn	np	np	np	np	np	np	nn	np	np	np	np	np	np	nn	np	np	nn	np	np	nn	nn	np	nn	nn
355	LG2	M03092	60.5116	nn	np	nn	nn	nn	np	nn	np	np	nn	nn	nn	nn	np	nn	np	nn	--	np	np	nn	nn	np	np	np	np	np	np	nn	np	np	np	np	np	np	nn	np	np	nn	np	np	nn	nn	np	nn	nn
356	LG2	M01951	60.5131	nn	np	nn	nn	nn	np	nn	np	np	nn	nn	nn	nn	np	nn	np	nn	--	np	np	nn	nn	np	np	np	np	np	np	nn	np	np	np	np	np	np	nn	np	np	nn	np	np	nn	nn	np	nn	nn
357	LG2	M05933	60.8627	nn	np	--	nn	nn	nn	nn	np	--	nn	nn	--	--	nn	nn	np	np	--	np	np	np	nn	np	np	np	np	nn	np	np	np	np	nn	nn	np	np	nn	nn	np	np	np	np	np	--	--	np	--
358	LG2	M64034	61.0886	nn	np	nn	nn	nn	np	nn	np	np	nn	nn	nn	nn	np	nn	np	nn	--	np	np	nn	nn	np	--	np	np	np	np	nn	--	nn	np	np	np	np	nn	np	np	nn	np	np	nn	nn	np	nn	nn
359	LG2	M11707	61.4034	nn	np	nn	--	nn	np	--	--	np	--	nn	nn	nn	--	nn	np	--	--	np	np	nn	nn	--	np	np	np	np	--	nn	np	--	np	--	np	np	nn	--	np	nn	--	np	nn	nn	--	nn	nn
360	LG2	M07890	61.445	nn	np	np	nn	--	nn	np	np	np	nn	--	np	np	--	--	--	np	nn	--	nn	np	np	--	np	--	np	nn	np	np	np	np	nn	np	np	np	np	np	np	np	--	np	np	np	nn	np	np
361	LG2	M08726	61.7479	nn	np	np	np	np	nn	np	nn	nn	np	np	np	np	nn	np	nn	np	nn	nn	nn	np	np	nn	nn	nn	nn	nn	nn	np	nn	np	nn	nn	nn	nn	np	nn	nn	np	nn	nn	np	np	nn	np	np
362	LG2	M03012	62.3575	lm	ll	lm	ll	ll	lm	ll	lm	lm	--	ll	lm	lm	lm	lm	lm	lm	lm	lm	lm	ll	lm	lm	lm	lm	lm	lm	lm	lm	lm	ll	lm	lm	lm	lm	lm	lm	lm	lm	lm	lm	lm	lm	lm	lm	lm
363	LG2	M68994	62.949	lm	ll	ll	lm	lm	lm	lm	ll	ll	--	lm	ll	ll	lm	ll	ll	ll	ll	ll	ll	ll	ll	ll	ll	ll	ll	lm	ll	ll	--	ll	lm	ll	ll	ll	ll	ll	ll	ll	ll	ll	ll	ll	lm	ll	ll
364	LG2	M62017	63.171	lm	ll	ll	lm	lm	lm	lm	ll	ll	--	lm	ll	ll	lm	ll	--	--	--	ll	ll	--	ll	ll	ll	ll	ll	lm	ll	--	--	--	lm	ll	ll	ll	--	--	ll	ll	ll	ll	ll	--	lm	ll	ll
365	LG2	M52453	64.155	hk	hk	hk	hk	k-	k-	k-	hk	hk	--	k-	hk	hk	k-	hk	hk	h-	h-	hk	hk	hh	h-	hk	hk	hh	hh	kk	hk	hk	hk	h-	k-	hk	hk	h-	hk	hk	hk	h-	hh	hh	hh	hk	hk	hk	hk
366	LG2	M68824	64.684	lm	ll	ll	--	lm	lm	lm	ll	ll	ll	lm	ll	ll	lm	ll	ll	ll	ll	ll	ll	ll	ll	ll	ll	ll	ll	lm	ll	ll	--	ll	lm	ll	ll	ll	ll	ll	ll	ll	--	ll	ll	ll	lm	ll	ll
367	LG2	M54010	65.048	lm	ll	ll	lm	lm	lm	lm	ll	ll	ll	lm	ll	ll	lm	ll	ll	ll	--	ll	ll	ll	ll	ll	ll	ll	ll	lm	ll	ll	ll	ll	lm	ll	ll	ll	ll	ll	ll	ll	ll	ll	ll	ll	--	ll	ll
368	LG2	M52471	65.418	lm	ll	lm	--	lm	lm	lm	ll	ll	ll	lm	ll	ll	--	ll	ll	ll	--	ll	ll	ll	ll	ll	ll	ll	ll	lm	ll	ll	--	ll	lm	ll	ll	ll	ll	ll	ll	ll	ll	ll	ll	ll	lm	ll	ll
369	LG2	cms13382	65.902	lm	ll	ll	lm	lm	lm	lm	ll	ll	ll	lm	ll	ll	lm	ll	ll	ll	ll	ll	ll	ll	ll	ll	ll	ll	ll	lm	ll	ll	ll	ll	lm	ll	ll	ll	ll	ll	ll	ll	ll	ll	--	ll	lm	ll	ll
370	LG2	M00108	66.391	lm	ll	ll	--	lm	lm	lm	ll	ll	ll	ll	ll	ll	lm	ll	ll	ll	ll	ll	ll	ll	ll	ll	ll	ll	ll	lm	ll	ll	ll	ll	lm	--	ll	ll	ll	ll	ll	ll	ll	ll	lm	ll	lm	ll	ll
371	LG2	M01149	67.413	lm	ll	ll	--	lm	lm	lm	ll	ll	ll	ll	ll	ll	lm	ll	ll	ll	ll	ll	ll	ll	ll	ll	ll	ll	ll	lm	ll	ll	ll	ll	lm	ll	ll	ll	ll	ll	ll	ll	ll	ll	ll	ll	lm	ll	ll
372	LG2	M08492	67.591	lm	ll	ll	ll	ll	ll	ll	ll	lm	ll	lm	lm	--	lm	--	ll	--	--	lm	lm	lm	lm	--	lm	lm	lm	ll	lm	lm	--	--	ll	lm	lm	--	lm	lm	--	lm	--	lm	ll	lm	ll	lm	lm
373	LG2	M10523	67.653	lm	ll	ll	ll	ll	ll	ll	--	lm	--	lm	lm	lm	ll	lm	lm	lm	lm	lm	lm	lm	lm	lm	lm	lm	lm	ll	lm	lm	--	--	ll	lm	lm	lm	--	lm	lm	lm	lm	lm	ll	lm	ll	lm	lm
374	LG2	M71521	68.276	lm	ll	ll	lm	--	lm	--	ll	ll	--	ll	ll	ll	ll	ll	--	ll	--	ll	ll	ll	ll	--	ll	ll	ll	ll	ll	ll	--	--	lm	ll	ll	ll	ll	ll	ll	ll	--	ll	lm	--	lm	--	ll
375	LG2	M63779	68.649	lm	ll	lm	ll	ll	ll	ll	lm	lm	lm	lm	lm	--	ll	lm	lm	lm	--	lm	lm	lm	lm	lm	lm	lm	lm	ll	lm	lm	lm	--	ll	lm	lm	lm	lm	lm	lm	lm	--	lm	ll	lm	ll	lm	lm
376	LG2	M67951	68.972	lm	ll	lm	ll	ll	ll	ll	lm	lm	lm	lm	lm	lm	ll	lm	lm	lm	lm	lm	lm	lm	lm	lm	lm	lm	lm	ll	lm	lm	lm	--	ll	lm	lm	lm	lm	lm	lm	lm	lm	lm	ll	lm	ll	lm	lm
377	LG2	M67952	69.104	lm	ll	lm	ll	ll	ll	ll	lm	lm	lm	lm	lm	lm	ll	lm	lm	lm	lm	lm	lm	lm	lm	lm	lm	lm	lm	ll	lm	lm	lm	--	ll	lm	lm	lm	lm	lm	lm	lm	lm	lm	ll	lm	ll	lm	lm
378	LG2	M69459	69.35	lm	ll	ll	lm	lm	lm	lm	ll	ll	ll	ll	ll	ll	lm	ll	ll	ll	ll	ll	ll	ll	ll	ll	ll	ll	ll	lm	ll	ll	ll	--	lm	ll	ll	ll	ll	ll	ll	ll	ll	ll	lm	ll	lm	ll	ll
379	LG2	M69120	69.744	lm	ll	ll	lm	lm	lm	lm	ll	ll	ll	ll	ll	ll	lm	ll	ll	ll	ll	ll	ll	ll	ll	ll	ll	ll	ll	lm	ll	ll	ll	ll	lm	ll	ll	ll	ll	ll	ll	ll	ll	ll	lm	ll	lm	ll	ll
380	LG2	M04544	70.056	lm	ll	lm	ll	ll	ll	ll	lm	lm	lm	lm	lm	lm	ll	lm	--	--	--	lm	lm	lm	lm	lm	lm	--	lm	ll	lm	lm	lm	--	ll	lm	lm	lm	lm	lm	--	lm	lm	lm	ll	lm	ll	lm	lm
381	LG2	M71103	70.241	lm	ll	ll	lm	lm	lm	lm	ll	ll	ll	ll	ll	ll	--	ll	ll	ll	--	ll	ll	ll	ll	ll	ll	ll	ll	lm	ll	ll	ll	--	lm	ll	ll	ll	ll	ll	ll	ll	--	ll	lm	ll	lm	ll	ll
382	LG2	M08195	70.414	lm	ll	--	ll	ll	ll	ll	lm	lm	--	lm	lm	lm	--	lm	lm	--	lm	lm	--	lm	lm	--	lm	lm	lm	lm	lm	lm	--	--	ll	--	lm	lm	lm	--	lm	lm	--	lm	ll	lm	ll	--	lm
383	LG2	M01245	70.711	lm	ll	ll	--	lm	lm	lm	ll	ll	ll	ll	ll	ll	lm	ll	ll	ll	ll	ll	ll	ll	ll	ll	ll	ll	ll	lm	ll	ll	ll	ll	lm	ll	ll	ll	ll	ll	ll	ll	ll	ll	lm	ll	lm	ll	ll
384	LG2	M00880	70.981	lm	ll	lm	lm	lm	lm	lm	ll	ll	ll	ll	ll	ll	--	ll	ll	ll	--	ll	ll	ll	ll	ll	ll	ll	ll	lm	ll	ll	ll	--	lm	ll	ll	ll	ll	--	ll	ll	ll	ll	lm	--	lm	ll	ll
385	LG2	M08255	71.025	lm	ll	ll	--	lm	lm	lm	ll	ll	ll	lm	ll	ll	lm	ll	ll	ll	ll	ll	ll	ll	ll	ll	ll	ll	ll	lm	ll	ll	ll	ll	lm	ll	ll	ll	ll	ll	ll	ll	ll	ll	ll	ll	lm	ll	ll
386	LG2	M04992	71.072	lm	ll	ll	lm	lm	lm	lm	ll	ll	ll	ll	ll	ll	lm	ll	ll	ll	ll	ll	ll	ll	ll	ll	ll	ll	ll	lm	ll	ll	ll	ll	lm	ll	ll	ll	ll	ll	ll	ll	ll	ll	lm	ll	lm	--	ll
387	LG2	M01866	71.617	lm	ll	ll	lm	lm	lm	lm	ll	ll	ll	ll	ll	ll	--	ll	ll	--	ll	ll	ll	ll	ll	ll	ll	ll	ll	lm	ll	ll	--	ll	lm	ll	ll	ll	ll	ll	ll	ll	ll	ll	lm	ll	lm	ll	ll
388	LG2	M04311	72.139	lm	ll	lm	ll	ll	ll	ll	lm	lm	lm	lm	lm	lm	ll	lm	lm	lm	lm	lm	lm	--	lm	lm	lm	lm	lm	ll	lm	lm	lm	lm	ll	--	lm	--	lm	ll	lm	lm	lm	lm	ll	lm	--	lm	lm
389	LG2	M70052	72.398	lm	ll	ll	--	lm	lm	lm	ll	ll	ll	ll	ll	ll	lm	ll	ll	ll	ll	ll	ll	ll	ll	ll	ll	ll	ll	lm	ll	ll	ll	ll	lm	ll	ll	ll	ll	ll	ll	ll	--	ll	lm	ll	lm	ll	ll
390	LG2	M69080	72.54	lm	ll	ll	lm	lm	lm	lm	ll	ll	ll	ll	ll	ll	lm	ll	ll	ll	--	ll	ll	ll	ll	ll	ll	ll	ll	lm	ll	ll	ll	ll	lm	ll	ll	ll	ll	ll	ll	ll	ll	ll	lm	ll	lm	ll	ll
391	LG2	M53999	72.604	lm	ll	ll	--	lm	lm	--	ll	ll	--	ll	ll	ll	lm	ll	ll	ll	--	ll	ll	ll	ll	ll	ll	ll	ll	lm	ll	ll	ll	ll	lm	ll	ll	ll	ll	--	ll	ll	ll	ll	lm	ll	lm	ll	ll
392	LG2	M55759	72.772	lm	ll	ll	lm	lm	lm	lm	ll	ll	ll	ll	ll	ll	lm	ll	ll	ll	--	ll	ll	ll	ll	ll	ll	ll	ll	lm	ll	ll	ll	ll	lm	ll	ll	ll	ll	ll	ll	ll	ll	ll	lm	--	lm	ll	ll
393	LG2	M70051	73.077	lm	ll	lm	ll	ll	ll	ll	lm	lm	lm	lm	lm	lm	ll	lm	lm	lm	lm	lm	lm	lm	lm	lm	lm	lm	lm	ll	lm	lm	lm	lm	ll	lm	lm	lm	lm	lm	lm	lm	--	lm	ll	--	ll	lm	lm
394	LG2	M71529	73.461	lm	ll	lm	ll	ll	--	--	--	lm	--	lm	--	lm	--	lm	lm	lm	--	lm	lm	lm	lm	lm	lm	lm	lm	ll	lm	lm	lm	lm	ll	--	lm	lm	lm	--	lm	lm	lm	lm	ll	--	ll	lm	lm
395	LG2	M53911	73.874	lm	ll	ll	lm	lm	lm	lm	ll	ll	ll	ll	ll	ll	ll	ll	ll	ll	ll	ll	ll	ll	ll	ll	ll	ll	ll	lm	ll	ll	ll	ll	lm	ll	ll	ll	ll	ll	ll	ll	ll	ll	lm	ll	lm	ll	ll
396	LG2	M70517	74.319	lm	ll	lm	ll	ll	ll	ll	lm	lm	lm	lm	lm	lm	--	lm	lm	--	--	lm	lm	lm	lm	lm	lm	lm	lm	ll	lm	lm	--	--	ll	lm	lm	lm	lm	--	lm	lm	lm	lm	ll	lm	ll	lm	lm
397	LG2	M05420	74.619	lm	ll	ll	lm	lm	lm	lm	ll	ll	ll	ll	ll	ll	lm	ll	ll	ll	ll	ll	ll	ll	ll	ll	ll	ll	ll	lm	ll	ll	ll	ll	lm	ll	ll	ll	ll	ll	ll	ll	ll	ll	lm	ll	lm	ll	ll
398	LG2	M01890	74.803	lm	ll	lm	ll	ll	ll	ll	lm	lm	--	lm	lm	lm	ll	lm	lm	lm	lm	lm	lm	lm	lm	lm	lm	lm	lm	ll	lm	lm	lm	lm	ll	lm	lm	lm	lm	lm	lm	lm	lm	lm	ll	lm	ll	lm	lm
399	LG2	M64787	75.772	lm	ll	--	lm	ll	ll	ll	lm	lm	lm	--	--	lm	ll	lm	lm	lm	ll	lm	lm	lm	--	lm	--	lm	lm	ll	lm	lm	--	lm	ll	--	lm	lm	lm	lm	--	--	lm	ll	ll	lm	ll	lm	--
400	LG2	M64784	75.785	lm	ll	--	lm	ll	ll	ll	--	lm	lm	--	--	lm	ll	lm	lm	lm	ll	lm	lm	lm	--	lm	--	lm	lm	ll	lm	lm	--	lm	ll	--	lm	lm	lm	lm	--	--	lm	ll	ll	lm	ll	lm	--
401	LG2	M64783	75.788	lm	ll	--	lm	ll	ll	ll	--	lm	lm	--	--	lm	ll	lm	lm	lm	ll	lm	lm	lm	--	lm	--	lm	lm	ll	lm	lm	--	lm	ll	--	lm	lm	lm	lm	lm	--	lm	ll	ll	lm	ll	lm	--
402	LG2	M64782	75.794	lm	ll	--	lm	ll	ll	ll	--	lm	lm	--	--	lm	ll	lm	lm	lm	ll	lm	lm	lm	--	lm	--	lm	lm	ll	lm	lm	--	lm	ll	--	lm	lm	lm	lm	--	--	lm	ll	ll	lm	ll	lm	--
403	LG2	M06142	76.571	lm	ll	lm	ll	ll	ll	ll	lm	lm	lm	lm	lm	lm	ll	--	--	ll	lm	lm	lm	lm	lm	lm	lm	lm	lm	ll	lm	lm	lm	lm	ll	lm	lm	lm	--	lm	lm	lm	lm	lm	ll	lm	ll	--	lm
404	LG2	M72780	77.268	lm	ll	lm	ll	ll	ll	ll	lm	lm	--	lm	lm	lm	ll	lm	lm	lm	--	lm	lm	lm	lm	lm	lm	lm	lm	ll	lm	lm	lm	lm	ll	lm	lm	lm	lm	--	lm	lm	lm	lm	ll	lm	ll	lm	lm
405	LG2	M02724	77.649	lm	ll	ll	lm	lm	lm	lm	ll	ll	ll	ll	ll	ll	lm	ll	ll	ll	ll	ll	ll	ll	ll	ll	ll	ll	ll	lm	ll	ll	ll	ll	lm	ll	ll	ll	ll	ll	ll	ll	ll	ll	lm	ll	lm	ll	ll
406	LG2	M02857	77.977	lm	ll	ll	lm	lm	lm	lm	ll	ll	ll	ll	ll	ll	lm	ll	ll	ll	ll	ll	ll	ll	ll	ll	ll	ll	ll	lm	ll	ll	ll	ll	lm	ll	ll	ll	ll	ll	ll	ll	ll	ll	lm	ll	lm	ll	ll
407	LG2	M71302	78.753	lm	ll	lm	ll	ll	ll	lm	lm	lm	lm	lm	lm	lm	ll	lm	lm	lm	--	lm	lm	lm	lm	lm	lm	lm	lm	ll	lm	lm	lm	--	ll	lm	lm	lm	lm	lm	lm	lm	lm	lm	ll	lm	ll	lm	lm
408	LG2	M01392	79.012	lm	ll	lm	ll	ll	ll	ll	--	lm	--	lm	lm	lm	ll	lm	lm	lm	lm	lm	lm	lm	lm	--	lm	lm	lm	ll	lm	lm	lm	lm	ll	lm	lm	lm	lm	--	lm	lm	lm	lm	ll	lm	ll	lm	lm
409	LG2	M11220	79.433	lm	ll	lm	ll	ll	ll	ll	lm	lm	--	lm	lm	lm	ll	lm	lm	lm	ll	lm	lm	lm	lm	lm	lm	lm	lm	ll	lm	lm	lm	lm	ll	--	lm	lm	lm	lm	lm	lm	lm	lm	ll	lm	ll	lm	lm
410	LG2	M03828	80.052	lm	ll	--	lm	lm	lm	lm	--	ll	--	--	ll	ll	lm	ll	lm	ll	ll	--	ll	ll	lm	ll	ll	ll	ll	lm	ll	lm	ll	--	lm	--	ll	lm	lm	--	ll	ll	ll	ll	lm	ll	lm	ll	ll
411	LG2	M06785	81.281	lm	ll	ll	lm	lm	lm	ll	ll	ll	ll	ll	ll	ll	lm	ll	ll	ll	ll	ll	ll	ll	lm	ll	ll	ll	ll	lm	ll	ll	ll	ll	lm	ll	ll	ll	ll	ll	ll	ll	ll	ll	lm	ll	lm	ll	ll
412	LG2	M05213	81.62	lm	ll	lm	ll	ll	ll	lm	lm	lm	lm	lm	lm	lm	ll	lm	--	lm	lm	lm	lm	lm	ll	lm	lm	lm	lm	ll	lm	lm	lm	lm	ll	lm	lm	lm	lm	lm	lm	lm	lm	lm	ll	lm	ll	lm	lm
413	LG2	M02504	81.918	lm	ll	ll	--	lm	lm	ll	ll	ll	ll	lm	ll	ll	lm	ll	ll	ll	ll	ll	ll	ll	lm	ll	ll	ll	ll	lm	ll	ll	ll	ll	lm	ll	ll	ll	ll	ll	ll	ll	ll	ll	lm	ll	lm	ll	ll
414	LG2	M66129	81.978	nn	np	np	--	nn	nn	np	np	np	--	np	--	np	nn	np	nn	nn	--	np	np	nn	nn	np	nn	np	np	np	np	nn	np	np	np	np	nn	np	np	nn	nn	np	np	nn	nn	np	np	--	np
415	LG2	M06473	82.575	lm	ll	ll	lm	lm	lm	ll	ll	ll	ll	lm	ll	ll	lm	ll	ll	ll	ll	ll	ll	ll	lm	ll	ll	ll	ll	lm	ll	ll	ll	ll	lm	ll	ll	ll	ll	ll	ll	ll	ll	ll	lm	ll	lm	ll	ll
416	LG2	M66560	83.237	lm	ll	ll	lm	lm	lm	ll	ll	ll	ll	--	ll	ll	--	ll	ll	ll	--	ll	ll	ll	lm	ll	ll	ll	ll	lm	ll	ll	--	ll	lm	ll	ll	ll	ll	ll	ll	ll	ll	ll	lm	ll	lm	ll	ll
417	LG2	M11150	84.103	lm	ll	ll	--	lm	lm	ll	ll	ll	ll	lm	ll	ll	lm	ll	ll	ll	ll	ll	ll	ll	lm	ll	ll	ll	ll	lm	ll	ll	ll	ll	lm	ll	ll	ll	ll	ll	ll	ll	ll	ll	lm	ll	lm	lm	ll
418	LG2	M58521	84.377	lm	ll	lm	lm	lm	--	ll	ll	ll	ll	lm	ll	ll	--	ll	ll	ll	--	ll	ll	ll	lm	ll	ll	ll	ll	lm	ll	ll	ll	ll	lm	ll	ll	ll	ll	ll	ll	ll	ll	ll	lm	ll	lm	lm	ll
419	LG2	M58523	84.737	lm	ll	lm	lm	lm	--	ll	ll	ll	ll	lm	ll	ll	--	ll	ll	ll	--	ll	ll	ll	lm	ll	ll	ll	ll	lm	ll	ll	ll	ll	lm	ll	ll	ll	ll	ll	ll	ll	ll	ll	lm	ll	lm	lm	ll
420	LG2	M10474	85.777	lm	ll	--	lm	ll	ll	lm	--	lm	ll	lm	lm	lm	ll	--	lm	--	lm	--	lm	lm	ll	lm	ll	lm	lm	ll	lm	lm	lm	--	ll	lm	lm	lm	lm	--	lm	lm	lm	lm	ll	--	ll	lm	lm
421	LG2	M56164	86.48	lm	ll	lm	--	lm	lm	--	ll	ll	--	lm	ll	ll	--	ll	ll	ll	--	ll	ll	ll	lm	ll	ll	ll	ll	--	ll	ll	--	--	lm	--	ll	ll	ll	--	--	--	ll	--	lm	--	lm	lm	ll
422	LG2	M01468	86.581	lm	ll	lm	ll	ll	lm	ll	lm	--	--	ll	lm	lm	lm	lm	lm	lm	lm	lm	lm	ll	lm	lm	lm	lm	lm	lm	lm	lm	lm	ll	lm	lm	lm	lm	lm	lm	lm	lm	lm	lm	lm	lm	lm	lm	lm
423	LG2	M07488	87.998	lm	ll	ll	ll	ll	ll	ll	--	--	--	lm	lm	lm	ll	--	ll	ll	ll	--	--	--	ll	lm	--	lm	lm	ll	--	ll	lm	ll	ll	lm	lm	lm	lm	--	lm	--	lm	lm	ll	lm	ll	lm	lm
424	LG2	M01212	88.055	lm	ll	ll	ll	ll	ll	ll	--	--	--	lm	lm	lm	ll	--	ll	ll	ll	--	--	--	ll	lm	--	lm	lm	ll	--	lm	lm	ll	ll	lm	lm	lm	lm	--	lm	--	lm	lm	ll	lm	ll	lm	lm
425	LG2	M12608	88.949	hk	hk	hh	hk	hh	hh	kk	hk	hk	k-	hh	--	hk	--	hk	hk	hk	--	hk	hk	kk	hh	hk	hk	hk	hk	hh	k-	hk	--	--	hh	kk	hk	hk	hk	--	hh	k-	hk	hk	hh	hk	hh	hh	h-
426	LG2	M67922	91.46	lm	ll	lm	--	lm	lm	ll	ll	ll	ll	lm	ll	ll	lm	ll	ll	ll	--	ll	ll	ll	lm	ll	ll	ll	ll	lm	ll	ll	ll	ll	lm	ll	ll	ll	ll	ll	--	ll	ll	ll	lm	ll	lm	lm	ll
427	LG2	M62678	93.16	lm	ll	ll	lm	lm	lm	ll	--	ll	ll	lm	ll	ll	--	ll	ll	--	--	ll	ll	ll	ll	ll	ll	ll	ll	lm	ll	ll	ll	--	lm	ll	ll	ll	ll	ll	ll	ll	ll	ll	lm	ll	lm	ll	ll
428	LG2	M69878	94.1	lm	ll	--	lm	--	lm	ll	ll	ll	--	ll	ll	ll	--	ll	ll	ll	--	ll	ll	ll	lm	--	ll	ll	ll	--	ll	ll	--	--	ll	--	--	ll	ll	ll	--	ll	ll	ll	--	--	ll	lm	ll
429	LG2	M57087	95.478	lm	ll	lm	--	lm	lm	ll	ll	ll	--	lm	ll	ll	--	ll	ll	ll	--	ll	ll	ll	lm	ll	ll	ll	ll	ll	ll	ll	ll	ll	ll	ll	ll	ll	ll	ll	lm	ll	ll	ll	lm	ll	lm	lm	ll
430	LG2	M57090	95.563	lm	ll	lm	lm	lm	lm	ll	ll	ll	--	lm	--	ll	--	ll	ll	ll	--	ll	ll	ll	lm	ll	ll	ll	ll	ll	ll	ll	ll	ll	ll	ll	ll	ll	ll	ll	lm	ll	ll	ll	lm	--	lm	lm	ll
431	LG2	M57091	95.679	lm	ll	lm	lm	lm	lm	ll	ll	ll	--	lm	--	ll	--	ll	ll	ll	--	ll	ll	ll	lm	ll	ll	ll	ll	ll	ll	ll	ll	ll	ll	ll	ll	ll	ll	ll	lm	ll	ll	ll	lm	--	lm	lm	ll
432	LG2	M08963	96.53	lm	ll	ll	--	ll	ll	ll	--	--	--	lm	lm	lm	ll	lm	ll	ll	--	--	ll	--	ll	lm	lm	lm	lm	ll	lm	lm	--	--	ll	--	--	lm	lm	--	lm	--	lm	lm	ll	lm	ll	lm	lm
433	LG2	M09273	96.723	lm	ll	ll	--	ll	ll	ll	--	--	--	lm	lm	lm	ll	lm	ll	ll	--	--	ll	--	ll	lm	--	lm	lm	ll	lm	lm	--	--	ll	--	--	lm	lm	--	lm	--	lm	lm	ll	lm	ll	lm	lm
434	LG2	M67721	97.103	lm	ll	lm	lm	lm	lm	ll	ll	ll	ll	lm	ll	ll	--	ll	ll	ll	ll	ll	ll	ll	--	ll	ll	ll	ll	lm	ll	ll	--	ll	lm	ll	ll	ll	ll	--	lm	ll	ll	ll	lm	ll	lm	lm	ll
435	LG2	M64426	98.648	lm	ll	lm	lm	lm	lm	ll	ll	ll	lm	lm	ll	ll	lm	ll	ll	ll	--	ll	ll	ll	lm	ll	ll	ll	ll	ll	ll	ll	ll	ll	ll	ll	ll	ll	ll	ll	lm	ll	ll	ll	lm	ll	ll	lm	ll
436	LG2	M01058	98.917	lm	ll	ll	lm	lm	lm	ll	ll	ll	lm	lm	ll	ll	lm	ll	lm	ll	ll	ll	ll	ll	lm	ll	ll	ll	ll	ll	ll	ll	ll	ll	ll	ll	ll	ll	ll	ll	lm	ll	ll	ll	lm	ll	ll	lm	ll
437	LG2	M01463	99.792	lm	ll	lm	lm	lm	lm	ll	ll	ll	lm	lm	ll	ll	lm	ll	lm	ll	ll	ll	ll	ll	lm	ll	ll	ll	ll	ll	ll	ll	ll	ll	ll	ll	ll	ll	ll	ll	lm	ll	ll	ll	lm	ll	ll	lm	ll
438	LG2	M70648	100.514	lm	ll	--	--	lm	ll	ll	ll	ll	ll	lm	ll	ll	lm	ll	lm	--	--	ll	ll	ll	lm	ll	ll	ll	ll	ll	ll	ll	--	--	ll	ll	ll	ll	ll	--	lm	ll	ll	ll	lm	ll	ll	lm	ll
439	LG2	M12510	102.5	lm	ll	--	lm	lm	lm	ll	--	ll	--	ll	--	ll	--	ll	lm	ll	--	ll	--	--	ll	--	ll	ll	ll	ll	ll	--	--	--	ll	ll	--	ll	ll	--	lm	ll	--	ll	lm	lm	ll	ll	ll
440	LG2	M06469	103.427	lm	ll	lm	lm	lm	lm	ll	ll	ll	lm	lm	ll	ll	ll	ll	lm	lm	ll	ll	ll	lm	lm	ll	ll	ll	ll	ll	ll	ll	ll	ll	ll	ll	lm	ll	ll	ll	lm	ll	ll	ll	lm	ll	ll	lm	ll
441	LG2	M10639	105.235	lm	ll	lm	ll	lm	lm	ll	ll	ll	lm	lm	ll	ll	lm	ll	lm	lm	ll	ll	ll	lm	lm	ll	ll	ll	ll	ll	ll	ll	ll	ll	ll	ll	lm	ll	ll	ll	lm	ll	ll	ll	lm	ll	ll	lm	ll
442	LG2	M01112	105.719	lm	ll	lm	ll	lm	--	ll	ll	ll	lm	lm	ll	ll	lm	ll	lm	lm	ll	ll	ll	lm	--	ll	ll	ll	ll	ll	ll	ll	ll	ll	ll	ll	lm	ll	ll	ll	lm	ll	ll	ll	lm	ll	ll	lm	ll
443	LG2	M02993	106.462	lm	ll	lm	lm	lm	lm	ll	ll	ll	lm	lm	ll	ll	lm	ll	lm	lm	ll	ll	ll	lm	lm	ll	ll	ll	ll	ll	ll	ll	ll	ll	ll	ll	lm	ll	ll	ll	lm	ll	ll	ll	lm	ll	ll	lm	ll
444	LG2	M54571	106.976	lm	ll	lm	lm	lm	lm	ll	ll	ll	lm	lm	ll	ll	lm	ll	--	lm	ll	ll	ll	lm	--	ll	ll	ll	ll	ll	ll	ll	ll	ll	ll	ll	lm	ll	ll	ll	--	ll	ll	ll	--	ll	ll	--	ll
445	LG2	M62260	107.812	lm	ll	lm	ll	lm	lm	ll	ll	ll	lm	lm	ll	ll	lm	ll	lm	lm	--	ll	ll	lm	lm	ll	ll	ll	ll	ll	ll	ll	--	ll	ll	ll	lm	ll	ll	ll	lm	ll	ll	ll	--	--	ll	--	ll
446	LG2	M12284	108.289	lm	ll	lm	ll	lm	lm	ll	ll	ll	lm	lm	ll	ll	lm	ll	lm	ll	ll	ll	ll	lm	lm	ll	ll	ll	ll	ll	ll	ll	ll	ll	ll	ll	lm	ll	ll	ll	--	ll	ll	ll	lm	ll	ll	--	ll
447	LG2	M03753	109.277	lm	ll	lm	lm	lm	lm	ll	ll	ll	ll	lm	ll	ll	ll	ll	lm	lm	lm	ll	ll	lm	lm	ll	ll	ll	ll	ll	ll	ll	ll	ll	ll	ll	lm	ll	ll	ll	lm	ll	ll	ll	lm	ll	ll	lm	ll
448	LG2	cms13267	109.741	hk	hk	kk	kk	hk	kk	hk	kk	hk	hh	hk	hk	hk	hh	kk	hh	hk	hk	kk	kk	hk	hk	hk	kk	hk	hk	kk	kk	hk	hk	kk	hk	kk	hh	kk	kk	hk	hh	kk	hk	hk	hk	kk	hk	hh	kk
449	LG2	M00806	109.82	lm	ll	ll	ll	ll	ll	lm	--	lm	ll	ll	lm	--	ll	lm	ll	ll	lm	lm	ll	ll	ll	lm	--	lm	lm	lm	lm	lm	--	lm	lm	lm	ll	lm	lm	--	ll	lm	lm	lm	ll	lm	lm	ll	lm
450	LG2	M12553	109.846	lm	ll	ll	ll	ll	ll	lm	--	ll	ll	ll	lm	--	ll	lm	ll	ll	lm	lm	ll	ll	ll	lm	--	lm	--	lm	lm	lm	--	lm	lm	lm	ll	lm	lm	--	ll	lm	--	lm	ll	lm	lm	ll	lm
451	LG2	M03970	110.11	lm	ll	ll	ll	ll	ll	lm	--	ll	ll	ll	lm	--	ll	lm	ll	ll	lm	lm	ll	ll	ll	lm	--	lm	--	lm	lm	lm	--	lm	lm	lm	ll	lm	lm	--	ll	lm	--	lm	ll	lm	lm	ll	lm
452	LG2	M11365	110.77	lm	ll	ll	--	ll	ll	lm	lm	lm	ll	ll	lm	lm	--	lm	ll	ll	lm	lm	lm	ll	ll	lm	lm	lm	lm	lm	lm	lm	lm	lm	lm	lm	ll	lm	lm	lm	ll	lm	lm	lm	ll	lm	lm	ll	lm
453	LG2	M65320	111.235	lm	ll	ll	lm	ll	ll	lm	lm	lm	ll	ll	lm	lm	ll	lm	ll	ll	--	lm	lm	ll	ll	lm	lm	lm	lm	lm	--	lm	lm	--	lm	lm	ll	lm	lm	lm	ll	lm	lm	lm	ll	lm	lm	ll	lm
455	LG2	M04774	112.376	lm	ll	ll	lm	ll	ll	lm	lm	lm	ll	ll	lm	lm	--	lm	ll	ll	--	lm	lm	ll	ll	lm	lm	lm	lm	lm	lm	lm	lm	lm	lm	lm	ll	lm	--	--	ll	lm	lm	--	ll	lm	lm	ll	lm
454	LG2	M71666	112.378	nn	np	np	np	np	nn	nn	np	nn	np	np	np	np	nn	np	nn	np	nn	np	np	np	np	nn	np	nn	nn	np	np	nn	nn	np	nn	np	nn	np	np	nn	nn	nn	nn	nn	np	nn	nn	nn	np
456	LG2	M52588	113.348	nn	np	np	nn	np	nn	nn	np	nn	np	np	np	np	nn	np	nn	np	nn	nn	np	np	np	nn	np	nn	nn	np	np	nn	nn	np	nn	np	nn	np	np	nn	nn	nn	nn	nn	np	nn	nn	nn	np
457	LG2	M64040	113.822	lm	ll	lm	ll	lm	lm	ll	ll	ll	lm	lm	ll	ll	lm	ll	lm	lm	ll	ll	ll	lm	lm	ll	ll	ll	ll	ll	ll	ll	ll	--	ll	ll	lm	ll	ll	ll	lm	ll	lm	ll	lm	ll	ll	lm	ll
458	LG2	M04894	113.883	nn	np	nn	nn	np	np	nn	np	nn	nn	np	np	nn	nn	np	nn	np	nn	np	np	np	np	nn	np	nn	nn	np	np	nn	nn	np	nn	np	nn	np	np	nn	nn	np	nn	nn	np	--	nn	nn	np
459	LG2	M55266	114.328	lm	ll	lm	ll	lm	lm	ll	ll	ll	--	lm	ll	ll	lm	ll	lm	lm	--	ll	ll	lm	lm	ll	ll	ll	ll	ll	ll	ll	ll	ll	ll	ll	lm	ll	ll	ll	lm	ll	--	ll	lm	ll	ll	lm	ll
460	LG2	M55268	114.939	lm	ll	ll	lm	ll	ll	lm	lm	lm	ll	ll	lm	lm	ll	lm	ll	ll	--	lm	lm	ll	ll	lm	lm	lm	lm	lm	lm	lm	lm	lm	lm	lm	ll	lm	lm	lm	ll	lm	ll	lm	ll	--	lm	ll	lm
461	LG2	M00688	115.95	lm	ll	lm	lm	lm	lm	ll	ll	ll	lm	lm	ll	ll	lm	ll	lm	lm	ll	ll	ll	lm	lm	ll	ll	ll	ll	ll	ll	ll	ll	ll	ll	ll	lm	ll	ll	--	lm	ll	lm	ll	lm	lm	--	lm	ll
462	LG2	M05629	116.18	nn	np	nn	nn	np	nn	nn	np	nn	nn	np	np	nn	nn	np	nn	np	nn	np	np	np	np	nn	np	nn	nn	np	np	nn	nn	np	nn	np	nn	np	np	nn	nn	np	nn	nn	np	nn	nn	nn	np
463	LG2	M12403	116.639	nn	np	np	nn	np	np	--	nn	np	np	np	np	np	np	nn	np	np	--	nn	nn	np	--	np	nn	np	--	nn	nn	np	np	nn	--	nn	np	nn	nn	np	np	nn	np	--	np	nn	nn	np	nn
464	LG2	M06481	116.85	nn	np	np	np	np	np	np	nn	--	np	--	nn	--	np	nn	np	np	np	nn	nn	np	np	np	nn	--	np	nn	nn	np	np	nn	--	nn	np	nn	nn	--	np	nn	np	np	--	--	np	np	nn
465	LG2	M56046	117.237	lm	ll	ll	lm	ll	ll	lm	lm	lm	ll	ll	lm	lm	ll	lm	ll	--	lm	lm	lm	ll	ll	lm	lm	lm	lm	lm	lm	lm	--	lm	lm	lm	ll	lm	lm	lm	ll	lm	ll	lm	ll	lm	lm	ll	lm
466	LG2	M03184	118.031	lm	ll	ll	lm	ll	ll	lm	lm	lm	ll	ll	--	lm	ll	lm	ll	ll	--	lm	lm	ll	ll	lm	lm	lm	lm	lm	lm	--	lm	--	lm	lm	ll	lm	lm	lm	ll	lm	ll	lm	ll	lm	lm	ll	lm
467	LG2	M06300	118.604	lm	ll	ll	lm	ll	ll	lm	lm	lm	ll	ll	lm	lm	--	lm	ll	ll	--	lm	lm	ll	ll	lm	lm	lm	lm	lm	lm	lm	lm	lm	lm	lm	ll	lm	ll	--	ll	lm	ll	lm	ll	lm	lm	ll	lm
468	LG2	M00550	119.302	lm	ll	ll	lm	ll	ll	lm	lm	lm	ll	ll	lm	lm	ll	lm	ll	ll	lm	lm	lm	ll	ll	lm	lm	lm	lm	lm	lm	lm	lm	ll	lm	lm	ll	--	lm	lm	ll	lm	ll	lm	ll	lm	lm	ll	lm
469	LG2	M54674	122.409	lm	ll	ll	lm	ll	ll	lm	lm	lm	--	ll	--	lm	--	lm	ll	ll	lm	--	lm	ll	ll	lm	lm	lm	lm	--	lm	lm	--	--	--	lm	ll	lm	lm	lm	ll	lm	ll	lm	ll	lm	lm	ll	lm
470	LG2	M07942	123.009	nn	np	np	nn	np	np	np	nn	np	--	np	nn	np	np	nn	np	nn	--	nn	nn	--	np	--	nn	--	np	nn	nn	np	np	nn	--	--	np	nn	nn	--	np	nn	np	np	--	nn	np	--	nn
471	LG2	M05126	123.12	lm	ll	ll	lm	ll	ll	lm	lm	lm	--	ll	lm	lm	ll	lm	ll	ll	--	lm	lm	ll	ll	lm	lm	lm	lm	lm	lm	lm	lm	lm	lm	lm	ll	lm	lm	--	ll	lm	ll	lm	ll	lm	lm	ll	lm
472	LG2	M03416	125.022	lm	ll	ll	lm	ll	ll	--	lm	lm	--	ll	--	lm	ll	lm	ll	ll	--	lm	lm	ll	--	lm	lm	lm	lm	--	lm	lm	lm	--	lm	--	ll	lm	lm	lm	ll	lm	ll	lm	ll	lm	lm	ll	lm
473	LG2	M01095	125.408	hk	hk	hk	hk	hh	hh	kk	hk	kk	hk	hh	kk	hk	h-	hk	hk	hh	--	hk	hk	hh	hh	kk	hk	kk	kk	hk	hk	kk	kk	--	kk	hk	hh	hk	hk	--	hh	hk	hk	hk	hh	hk	hk	hk	hk
474	LG2	M06506	126.31	nn	np	np	nn	np	np	np	nn	np	--	np	nn	np	np	nn	np	nn	--	nn	nn	--	np	--	nn	--	np	nn	nn	np	np	nn	nn	--	np	nn	nn	--	np	nn	np	np	--	nn	np	--	nn
475	LG2	M11898	127.046	nn	np	np	nn	np	np	np	nn	np	--	np	nn	np	np	nn	np	nn	--	nn	nn	--	np	--	nn	--	np	nn	nn	np	np	nn	nn	--	np	nn	nn	--	np	nn	np	np	--	nn	np	--	nn
476	LG2	M11869	127.176	hk	hk	hk	hh	kk	kk	hh	hk	hh	hk	kk	hh	hk	k-	hk	hk	kk	--	hk	hk	kk	kk	hh	hk	hh	hh	hk	hk	hh	hh	--	hh	hk	kk	hk	hk	--	kk	hk	hk	hk	kk	hk	hk	hk	hk
477	LG2	M05430	133.492	hk	hk	h-	hk	hh	hh	hk	k-	hk	--	hh	k-	hk	hh	hk	hk	--	hk	hk	hk	hh	hh	hk	hk	hk	hk	hk	hk	hk	hk	hk	k-	hk	hh	hk	hk	h-	hh	hk	hk	hk	hh	hk	hk	hk	hk
478	LG2	M05020	133.546	lm	ll	ll	lm	lm	ll	--	lm	lm	ll	lm	lm	lm	ll	lm	ll	lm	lm	lm	lm	--	lm	lm	lm	lm	lm	lm	lm	lm	lm	lm	lm	lm	ll	lm	lm	--	ll	lm	ll	--	lm	lm	lm	ll	lm
479	LG2	M02680	134.368	hk	hk	hk	kk	hk	hk	kk	kk	k-	hk	hk	kk	hk	hk	k-	hk	hk	kk	k-	hk	hk	hk	kk	hk	kk	hk	hk	hk	kk	kk	hk	kk	hk	hk	k-	hk	kk	hk	k-	hk	hk	hk	hk	k-	hk	hk
480	LG2	M10806	134.448	hk	hk	h-	hk	hh	hh	--	k-	hk	--	hh	k-	hk	hh	hk	hk	--	hk	hk	hk	hh	hh	hk	hk	hk	hk	h-	hk	hk	hk	hk	k-	hk	hh	hk	hk	h-	hh	hk	hk	h-	hh	hk	hk	hk	hk
481	LG2	M09365	134.789	hk	hk	h-	hk	hh	hh	hk	k-	hk	--	hh	k-	hk	hh	hk	hk	--	hk	hk	hk	hh	hh	hk	hk	hk	hk	h-	hk	hk	hk	hk	k-	hk	hh	hk	hk	h-	hh	hk	hk	hk	hh	hk	hk	hk	hk
482	LG2	M02508	135.631	nn	np	np	nn	np	np	np	nn	np	--	np	nn	np	np	nn	np	nn	--	nn	nn	--	np	--	nn	--	np	nn	nn	np	np	nn	nn	--	np	nn	nn	--	np	nn	np	np	--	nn	np	--	nn
483	LG2	M10007	136.385	lm	ll	lm	lm	ll	ll	lm	lm	lm	lm	ll	lm	lm	ll	lm	lm	ll	lm	lm	lm	ll	ll	lm	lm	lm	lm	lm	lm	lm	lm	lm	lm	lm	ll	lm	lm	lm	ll	lm	lm	lm	ll	lm	lm	lm	lm
484	LG2	M00324	136.783	nn	np	np	nn	np	np	np	nn	np	--	np	nn	np	np	nn	np	nn	--	nn	nn	--	np	--	nn	--	np	nn	nn	np	np	nn	nn	--	np	nn	nn	--	np	nn	np	np	--	nn	np	--	nn
485	LG2	M02994	137.445	hk	hk	hk	kk	hk	hk	kk	k-	kk	hk	hk	k-	hk	hk	hk	hk	hk	--	hk	hk	hk	hk	kk	hk	kk	kk	hk	hk	kk	--	hk	kk	hk	hk	hk	hk	kk	hk	hk	hk	hk	hk	hk	hk	hk	hk
486	LG2	M08421	137.567	lm	ll	ll	lm	lm	--	--	lm	lm	ll	lm	--	lm	ll	lm	ll	ll	ll	lm	lm	--	--	--	lm	lm	lm	lm	lm	lm	ll	lm	lm	lm	lm	lm	lm	ll	ll	lm	ll	--	--	lm	lm	ll	lm
487	LG2	M03296	138.708	lm	ll	lm	lm	ll	ll	lm	lm	lm	lm	ll	lm	lm	ll	lm	lm	ll	lm	lm	lm	ll	ll	lm	lm	lm	lm	lm	lm	lm	lm	lm	lm	lm	ll	lm	lm	lm	ll	lm	lm	lm	lm	lm	lm	lm	lm
488	LG2	M01338	139.656	lm	ll	lm	ll	lm	lm	ll	--	ll	lm	lm	--	lm	lm	lm	lm	lm	--	lm	lm	lm	lm	ll	lm	ll	ll	lm	lm	ll	--	lm	ll	lm	lm	lm	lm	ll	lm	lm	lm	lm	lm	lm	lm	lm	lm
489	LG2	M05361	139.873	lm	ll	ll	--	ll	ll	lm	lm	lm	ll	ll	ll	ll	ll	lm	ll	--	--	lm	lm	ll	ll	lm	lm	lm	lm	lm	lm	lm	--	--	lm	lm	ll	lm	lm	lm	ll	lm	ll	lm	ll	lm	lm	ll	ll
490	LG2	M70043	140.83	lm	ll	ll	lm	ll	ll	--	lm	lm	ll	ll	ll	ll	--	lm	ll	ll	lm	lm	lm	ll	ll	lm	lm	lm	lm	--	lm	lm	lm	--	lm	lm	ll	lm	lm	ll	ll	lm	ll	ll	ll	lm	lm	lm	ll
491	LG2	M70202	142.229	lm	ll	ll	lm	ll	ll	lm	lm	lm	ll	ll	ll	ll	ll	lm	ll	ll	lm	lm	lm	ll	ll	lm	lm	lm	lm	lm	lm	lm	lm	lm	lm	lm	ll	lm	lm	lm	ll	lm	ll	ll	ll	lm	lm	lm	ll
492	LG2	M04804	142.237	lm	ll	lm	--	ll	ll	lm	lm	lm	--	ll	lm	--	lm	--	ll	ll	--	lm	--	ll	ll	lm	lm	lm	lm	lm	lm	lm	lm	ll	lm	lm	ll	--	lm	lm	ll	--	ll	--	ll	lm	lm	--	lm
493	LG2	M70203	142.839	lm	ll	ll	--	ll	ll	lm	lm	lm	ll	ll	ll	ll	ll	lm	ll	ll	lm	lm	lm	ll	ll	lm	lm	lm	lm	lm	lm	lm	lm	lm	lm	lm	ll	lm	lm	lm	ll	lm	ll	ll	ll	lm	lm	lm	ll
494	LG2	M09945	143.522	lm	ll	lm	lm	ll	ll	lm	lm	lm	lm	ll	lm	lm	ll	lm	lm	ll	--	lm	ll	ll	ll	ll	--	lm	lm	lm	lm	lm	--	lm	lm	lm	ll	ll	ll	ll	ll	--	lm	lm	ll	lm	ll	ll	lm
495	LG2	M62541	144.766	lm	ll	ll	lm	ll	ll	lm	lm	lm	ll	ll	ll	ll	ll	lm	ll	ll	--	lm	lm	ll	ll	lm	lm	lm	lm	lm	lm	ll	lm	--	lm	lm	ll	lm	lm	lm	ll	lm	ll	ll	ll	ll	lm	lm	ll
496	LG2	M64231	145.461	lm	ll	--	lm	ll	--	lm	--	lm	--	ll	ll	ll	ll	lm	ll	ll	--	lm	lm	--	ll	lm	lm	lm	lm	lm	lm	ll	--	lm	lm	lm	ll	--	lm	--	ll	lm	ll	ll	ll	--	lm	lm	ll
497	LG2	M07740	146.394	lm	ll	lm	lm	lm	lm	ll	lm	lm	ll	lm	ll	lm	lm	lm	lm	lm	ll	lm	lm	lm	lm	ll	lm	ll	lm	lm	lm	ll	ll	lm	ll	--	lm	lm	lm	ll	--	lm	lm	lm	lm	ll	lm	lm	lm
498	LG2	M05770	146.409	lm	ll	lm	lm	lm	lm	ll	lm	lm	ll	lm	ll	lm	lm	lm	lm	lm	ll	lm	lm	lm	lm	ll	lm	ll	lm	lm	lm	ll	ll	lm	ll	--	lm	lm	lm	ll	lm	lm	lm	lm	lm	--	lm	lm	lm
499	LG2	M04084	147.894	lm	ll	ll	lm	ll	ll	lm	ll	lm	ll	ll	ll	ll	lm	ll	ll	ll	ll	--	lm	ll	ll	lm	lm	lm	lm	lm	lm	ll	lm	lm	lm	lm	ll	lm	ll	ll	ll	lm	ll	ll	ll	ll	lm	lm	ll
500	LG2	M07628	147.895	lm	ll	ll	lm	ll	ll	--	lm	--	ll	ll	lm	ll	ll	lm	ll	ll	lm	--	--	ll	ll	lm	lm	lm	--	ll	lm	--	lm	lm	lm	--	ll	lm	lm	lm	ll	--	ll	ll	ll	lm	ll	ll	ll
501	LG2	M01776	150.256	lm	ll	ll	lm	ll	ll	lm	--	lm	ll	ll	ll	ll	lm	ll	ll	--	ll	lm	lm	ll	ll	lm	lm	lm	lm	lm	lm	ll	--	lm	lm	lm	ll	lm	lm	ll	ll	lm	ll	ll	ll	--	--	lm	ll
502	LG2	M12265	150.814	lm	ll	lm	lm	lm	lm	ll	lm	lm	lm	lm	ll	lm	lm	lm	lm	lm	--	lm	lm	lm	lm	ll	lm	ll	lm	lm	lm	ll	ll	lm	ll	lm	lm	lm	lm	ll	lm	lm	lm	lm	lm	lm	lm	lm	lm
503	LG3	M10300	0	nn	np	nn	nn	nn	np	nn	nn	nn	nn	np	nn	np	nn	np	np	--	np	nn	nn	nn	np	nn	np	nn	nn	np	nn	nn	nn	nn	nn	nn	nn	np	nn	np	nn	np	np	nn	nn	nn	nn	np	np
504	LG3	M08322	2.999	nn	np	nn	nn	nn	np	nn	nn	nn	nn	np	nn	np	nn	np	np	np	np	nn	nn	nn	np	nn	np	nn	nn	np	np	nn	nn	np	nn	nn	nn	np	nn	np	np	np	nn	nn	nn	nn	nn	np	np
505	LG3	M00293	3.592	nn	np	nn	nn	nn	np	nn	nn	nn	nn	np	nn	np	nn	np	np	np	np	nn	nn	nn	np	nn	np	nn	nn	np	np	nn	nn	np	nn	nn	nn	np	nn	np	np	np	nn	nn	nn	nn	nn	np	np
506	LG3	M00024	7.182	nn	np	nn	nn	nn	np	nn	nn	nn	nn	np	nn	np	nn	np	np	np	np	nn	nn	nn	np	nn	np	nn	nn	--	np	nn	nn	np	nn	nn	nn	np	nn	np	nn	nn	nn	nn	nn	nn	nn	np	np
507	LG3	M06007	7.256	lm	ll	lm	lm	ll	lm	lm	lm	lm	ll	lm	ll	lm	lm	lm	lm	lm	lm	ll	ll	--	lm	--	lm	lm	ll	lm	ll	ll	--	lm	ll	ll	lm	lm	ll	lm	lm	lm	lm	lm	--	lm	ll	lm	lm
508	LG3	M04469	7.771	nn	np	nn	nn	nn	np	nn	nn	nn	nn	np	nn	np	nn	np	np	np	np	nn	nn	nn	np	nn	np	nn	nn	--	np	nn	nn	np	nn	nn	nn	np	nn	np	nn	nn	nn	nn	nn	nn	nn	np	np
509	LG3	M00666	8.17	nn	np	nn	nn	nn	np	nn	nn	nn	nn	np	nn	np	nn	np	np	np	np	nn	nn	nn	np	nn	np	nn	nn	--	np	nn	nn	np	nn	nn	nn	np	nn	np	nn	np	nn	nn	nn	nn	nn	np	np
510	LG3	M07418	13.064	lm	ll	lm	ll	lm	ll	lm	lm	lm	lm	lm	lm	lm	ll	ll	ll	ll	ll	lm	lm	lm	ll	lm	ll	lm	lm	ll	lm	lm	lm	ll	lm	--	lm	ll	lm	lm	--	lm	lm	lm	lm	--	lm	ll	lm
511	LG3	M02619	13.76	hk	hk	hk	kk	hh	kk	hk	hh	hk	hh	hk	hh	hk	kk	kk	kk	--	kk	hh	hh	hh	kk	hh	kk	hk	hh	kk	hk	hh	hh	kk	hh	hh	hk	kk	hh	hk	kk	hk	hk	hk	hh	hk	hh	kk	hk
512	LG3	M53013	15.238	nn	np	nn	np	nn	np	nn	np	nn	nn	np	nn	np	nn	np	np	np	--	nn	nn	nn	np	nn	nn	nn	nn	np	nn	nn	nn	nn	nn	nn	nn	np	nn	np	nn	np	nn	nn	nn	nn	nn	np	np
513	LG3	M53012	15.983	nn	np	nn	np	nn	np	nn	np	nn	nn	np	nn	np	nn	np	np	np	--	nn	nn	nn	np	nn	nn	nn	nn	np	nn	nn	nn	nn	nn	nn	nn	np	nn	np	nn	np	nn	nn	nn	nn	nn	np	np
514	LG3	M03020	17.305	lm	ll	lm	--	ll	--	lm	ll	lm	ll	ll	ll	ll	lm	lm	lm	lm	lm	ll	ll	ll	lm	ll	lm	lm	ll	lm	ll	ll	ll	lm	ll	ll	lm	--	ll	ll	lm	ll	lm	lm	ll	lm	ll	lm	ll
515	LG3	M02360	18.007	nn	np	np	np	np	nn	--	np	--	--	--	np	--	--	nn	nn	nn	nn	np	np	np	nn	np	nn	np	--	nn	np	np	np	np	np	np	--	nn	np	--	np	nn	nn	nn	np	nn	np	nn	--
516	LG3	M51106	18.217	lm	ll	lm	lm	ll	lm	lm	ll	lm	ll	ll	ll	ll	lm	lm	lm	lm	--	ll	ll	ll	lm	ll	lm	lm	ll	lm	ll	ll	ll	lm	ll	ll	lm	lm	ll	ll	lm	ll	lm	lm	ll	lm	ll	lm	ll
517	LG3	M12597	18.447	lm	ll	lm	lm	ll	lm	lm	ll	lm	ll	ll	ll	ll	lm	lm	lm	lm	lm	ll	ll	ll	lm	ll	lm	lm	ll	lm	ll	ll	ll	lm	ll	ll	lm	lm	ll	ll	lm	ll	lm	lm	ll	lm	ll	lm	ll
518	LG3	M54537	19.746	hk	hk	h-	h-	h-	kk	--	h-	h-	--	h-	h-	h-	--	kk	h-	kk	--	h-	h-	h-	kk	h-	--	h-	h-	kk	h-	h-	h-	h-	h-	h-	h-	kk	h-	--	h-	h-	h-	h-	h-	h-	h-	kk	h-
519	LG3	M54538	19.822	hk	hk	h-	h-	h-	kk	--	h-	h-	--	h-	h-	h-	--	kk	h-	kk	--	h-	h-	h-	kk	h-	h-	h-	h-	kk	h-	h-	h-	h-	h-	h-	h-	kk	h-	--	h-	h-	h-	h-	h-	h-	h-	kk	h-
520	LG3	M11053	20.414	nn	np	np	nn	np	nn	np	np	np	np	np	np	np	nn	nn	nn	nn	nn	np	np	np	nn	np	nn	np	np	nn	np	np	np	nn	np	--	np	nn	np	np	--	np	np	np	np	--	np	nn	np
521	LG3	M69762	21.825	hk	hk	hk	hk	kk	hh	hk	hk	hk	--	hk	kk	hk	hk	hh	hk	hh	hh	kk	kk	kk	hh	kk	hk	hk	kk	hh	kk	kk	kk	hk	kk	kk	hk	hh	kk	hk	kk	hk	hk	h-	kk	h-	kk	hh	hk
522	LG3	M65562	22.654	lm	ll	lm	ll	ll	lm	lm	--	lm	ll	ll	ll	ll	lm	lm	ll	lm	lm	ll	ll	ll	--	ll	lm	lm	ll	lm	ll	ll	ll	lm	ll	ll	lm	lm	ll	--	lm	ll	lm	lm	ll	lm	ll	lm	ll
523	LG3	M61739	23.086	nn	np	nn	--	nn	np	nn	np	nn	nn	np	nn	np	np	np	np	np	np	nn	nn	nn	np	nn	nn	nn	nn	--	nn	nn	nn	nn	nn	nn	nn	np	nn	np	nn	np	nn	nn	nn	nn	nn	np	np
524	LG3	M70089	24.066	nn	np	nn	nn	nn	np	nn	np	nn	nn	np	nn	np	--	np	np	np	np	nn	nn	nn	np	nn	nn	nn	nn	np	nn	nn	nn	--	nn	--	nn	np	nn	np	nn	np	--	nn	nn	nn	nn	--	np
525	LG3	M70086	24.341	nn	np	nn	nn	nn	np	nn	np	nn	nn	np	nn	np	--	np	np	np	np	nn	nn	nn	np	nn	nn	nn	nn	np	nn	nn	nn	--	nn	--	nn	np	nn	np	nn	np	--	nn	nn	nn	nn	--	np
526	LG3	M63764	24.414	lm	ll	lm	--	ll	lm	lm	ll	--	--	ll	ll	ll	lm	lm	ll	lm	--	ll	ll	ll	lm	ll	lm	lm	ll	lm	ll	ll	ll	ll	ll	ll	lm	lm	ll	--	ll	ll	lm	lm	ll	lm	ll	lm	ll
527	LG3	M11894	26.807	hk	hk	hk	hh	hh	kk	hk	kk	hk	--	hk	hh	hk	kk	kk	hk	kk	kk	hh	hk	hh	kk	hh	hk	hk	hh	kk	hh	hk	hk	hk	hk	hh	hk	kk	hh	hk	hh	hk	kk	hk	hh	hk	hh	kk	hk
528	LG3	M08529	27.422	hk	hk	hk	hh	hh	kk	hk	kk	hk	--	hk	hh	hk	kk	kk	hk	kk	kk	hh	hk	hh	kk	hh	hk	hk	hh	kk	hh	hk	--	hk	hk	hh	hk	kk	hh	hk	hh	hk	kk	hk	hh	--	hh	kk	hk
529	LG3	M52761	28.611	nn	np	nn	nn	nn	np	nn	np	nn	--	np	nn	np	np	np	np	np	--	nn	nn	nn	np	nn	nn	nn	nn	np	nn	np	--	--	nn	--	nn	nn	nn	--	nn	np	--	nn	nn	--	nn	--	np
530	LG3	M52760	29.129	lm	ll	lm	ll	ll	lm	lm	ll	lm	--	ll	ll	ll	lm	lm	ll	lm	--	ll	lm	ll	lm	ll	--	lm	ll	lm	ll	ll	--	--	ll	--	lm	--	ll	ll	ll	ll	--	ll	ll	--	ll	--	ll
531	LG3	M70960	30.783	lm	ll	lm	ll	--	--	lm	ll	lm	ll	lm	ll	ll	--	lm	ll	--	--	ll	lm	ll	lm	ll	--	--	ll	lm	ll	ll	ll	lm	ll	ll	lm	lm	ll	ll	ll	ll	--	lm	ll	--	ll	lm	ll
532	LG3	M52969	31.759	nn	np	nn	nn	nn	nn	nn	np	nn	nn	np	nn	np	np	np	np	nn	--	nn	nn	nn	np	nn	nn	nn	nn	np	nn	np	nn	--	np	nn	nn	--	--	np	nn	np	--	--	nn	nn	--	np	--
533	LG3	M60821	33.242	nn	np	nn	nn	--	--	np	nn	nn	nn	nn	--	nn	--	np	--	nn	--	nn	np	--	nn	nn	np	np	np	np	np	nn	np	--	nn	--	np	np	np	--	np	np	--	--	np	nn	nn	--	nn
534	LG3	M12541	34.673	nn	np	nn	nn	nn	nn	nn	np	nn	nn	np	nn	--	--	np	np	np	--	nn	nn	nn	np	nn	nn	nn	nn	np	nn	np	nn	nn	np	nn	nn	np	nn	--	nn	nn	np	nn	nn	--	nn	np	np
535	LG3	M66633	34.803	nn	np	np	np	--	nn	np	--	np	np	np	np	np	np	nn	--	np	--	np	np	np	np	nn	np	np	--	np	np	np	--	--	np	np	np	nn	np	np	np	np	--	nn	nn	np	--	np	np
536	LG3	M53561	35.541	hk	hk	hk	hk	hk	h-	hh	hk	kk	hh	kk	hh	hk	hk	kk	hk	kk	hk	hh	hk	hh	kk	hh	hk	hk	hh	hk	hh	hk	hh	hk	hk	hh	hk	hk	hh	hk	hh	hh	kk	hk	hh	hk	hh	kk	hk
537	LG3	M03081	36.19	lm	ll	--	lm	lm	lm	lm	ll	lm	--	lm	ll	lm	lm	lm	lm	lm	lm	ll	--	ll	lm	ll	lm	lm	ll	lm	ll	lm	ll	lm	lm	ll	lm	lm	ll	lm	ll	ll	lm	ll	ll	lm	ll	lm	--
538	LG3	M53562	36.622	hk	hk	hk	hk	hk	h-	hh	hk	kk	hh	kk	hh	hk	hk	kk	hk	kk	hk	hh	hk	hh	kk	hh	hk	hk	hh	hk	hh	hk	hh	hk	hk	hh	hk	hk	hh	hk	hh	hh	kk	hk	hh	hk	hh	kk	hk
539	LG3	M63718	37.007	hk	hk	hk	hk	hk	hk	hk	k-	hh	--	hh	kk	hk	h-	hh	hk	hh	hk	kk	hk	kk	hh	kk	hk	hk	kk	hh	kk	hk	--	--	hk	kk	hk	hk	kk	hk	kk	kk	hh	hk	kk	hk	kk	hh	hk
540	LG3	M53265	37.975	lm	ll	lm	lm	lm	lm	lm	ll	lm	ll	lm	ll	lm	lm	lm	lm	lm	lm	ll	lm	ll	lm	ll	lm	lm	ll	lm	ll	lm	ll	lm	lm	ll	lm	lm	ll	lm	ll	ll	lm	lm	ll	lm	ll	lm	lm
541	LG3	M53264	37.994	lm	ll	lm	lm	lm	lm	lm	ll	lm	ll	lm	ll	lm	lm	lm	lm	lm	lm	ll	lm	ll	lm	ll	lm	lm	ll	lm	ll	lm	ll	lm	lm	ll	lm	lm	ll	lm	ll	ll	lm	lm	ll	lm	ll	lm	lm
542	LG3	M12135	40.36	nn	np	nn	nn	nn	nn	nn	np	np	nn	np	nn	np	np	np	np	nn	nn	nn	nn	nn	np	nn	nn	nn	nn	nn	nn	np	nn	nn	np	nn	nn	nn	nn	np	nn	nn	np	nn	nn	nn	nn	np	np
543	LG3	M70478	41.429	lm	ll	lm	ll	lm	lm	--	ll	lm	ll	lm	ll	ll	ll	lm	ll	lm	lm	ll	lm	ll	lm	ll	lm	lm	ll	lm	ll	ll	ll	lm	ll	ll	lm	lm	ll	ll	ll	ll	--	lm	ll	lm	ll	lm	ll
544	LG3	M61305	41.65	nn	np	nn	nn	nn	np	nn	nn	nn	--	nn	np	nn	nn	--	nn	nn	--	nn	nn	nn	nn	np	nn	np	nn	np	nn	nn	np	np	nn	nn	nn	nn	nn	nn	np	np	nn	nn	nn	np	nn	np	nn
545	LG3	M11932	42.851	hk	hk	hk	kk	hk	hk	hk	hk	hh	--	hh	hk	hk	hk	hh	hk	hh	--	kk	hk	kk	hh	kk	hh	hk	kk	hk	kk	hk	kk	--	hk	kk	hk	hk	kk	hk	kk	kk	hh	hk	kk	--	hk	hh	hk
546	LG3	M04757	43.794	hk	hk	hk	kk	hk	hk	hk	hk	hh	--	hh	hk	hk	hk	hh	hk	hh	--	kk	hk	kk	hh	kk	hh	hk	kk	hk	kk	hk	kk	--	hk	kk	hk	hk	kk	hk	kk	kk	hh	hk	kk	--	hk	hh	hk
547	LG3	M66634	44.556	nn	np	np	nn	--	nn	nn	nn	np	np	np	--	np	np	nn	nn	np	--	np	nn	np	np	nn	np	--	nn	nn	nn	np	--	--	np	np	--	np	np	np	nn	np	--	nn	--	np	np	np	np
548	LG3	M00940	45.775	lm	ll	lm	ll	lm	lm	lm	ll	lm	--	lm	lm	ll	ll	lm	ll	lm	--	ll	lm	ll	lm	ll	lm	lm	ll	lm	ll	ll	ll	--	ll	ll	lm	lm	ll	ll	ll	ll	ll	lm	ll	--	lm	lm	ll
549	LG3	M01813	46.605	nn	np	np	nn	nn	nn	nn	--	np	--	np	nn	np	--	np	nn	--	nn	np	nn	--	np	nn	np	nn	nn	nn	nn	np	nn	nn	np	nn	nn	nn	nn	np	nn	nn	np	nn	nn	nn	nn	np	np
550	LG3	M00827	47.482	hk	hk	hh	hk	hk	hh	k-	--	hh	--	hh	hk	hk	--	hh	kk	hh	hk	hk	hk	k-	hh	kk	h-	kk	kk	hk	kk	hk	k-	hk	hk	kk	h-	hk	kk	hk	kk	kk	hk	hk	kk	hk	hk	hh	hk
551	LG3	M06263	48.224	nn	np	nn	--	nn	nn	--	nn	nn	nn	nn	--	np	--	nn	np	nn	nn	--	nn	np	nn	np	nn	np	np	--	np	--	np	nn	np	np	--	nn	np	np	np	np	nn	--	np	--	nn	nn	np
552	LG3	M70514	49.615	lm	ll	lm	lm	lm	lm	lm	ll	lm	--	--	lm	ll	--	lm	ll	--	--	ll	lm	ll	lm	ll	lm	ll	ll	lm	ll	ll	--	--	ll	--	lm	lm	ll	ll	ll	ll	lm	lm	ll	ll	lm	lm	ll
553	LG3	M70961	50.43	lm	ll	lm	ll	lm	lm	lm	ll	lm	ll	lm	lm	ll	--	lm	ll	lm	ll	ll	lm	ll	lm	ll	lm	ll	ll	lm	ll	ll	ll	--	ll	--	lm	lm	ll	ll	ll	ll	lm	--	ll	lm	lm	lm	ll
554	LG3	M07159	50.795	nn	np	np	nn	nn	nn	nn	np	np	np	np	nn	np	np	np	nn	np	nn	np	nn	nn	np	nn	np	nn	nn	nn	nn	np	nn	nn	np	np	nn	nn	nn	np	nn	nn	--	nn	nn	nn	nn	np	np
555	LG3	M62690	51.381	nn	np	--	nn	nn	nn	nn	np	np	--	np	nn	np	--	np	nn	--	--	--	nn	nn	np	nn	np	nn	nn	nn	nn	np	--	--	np	nn	nn	nn	nn	np	nn	nn	np	nn	nn	nn	nn	np	np
556	LG3	M09407	51.394	lm	ll	ll	lm	lm	lm	--	lm	lm	ll	ll	lm	lm	--	lm	lm	ll	ll	--	lm	lm	ll	lm	ll	lm	lm	lm	lm	ll	lm	lm	lm	lm	lm	ll	lm	lm	lm	lm	lm	ll	lm	lm	--	ll	lm
557	LG3	M05139	52.973	nn	np	np	nn	nn	nn	nn	--	np	np	np	nn	np	np	nn	nn	np	nn	np	nn	nn	np	nn	np	nn	nn	nn	nn	np	nn	--	np	np	nn	nn	nn	np	nn	np	--	nn	nn	nn	nn	np	np
558	LG3	M55874	53.297	nn	np	np	nn	np	nn	np	--	nn	np	np	np	nn	--	np	nn	np	--	nn	nn	nn	--	--	np	nn	nn	np	nn	np	--	--	--	nn	np	np	nn	--	--	nn	nn	nn	nn	np	np	np	nn
559	LG3	M00122	54.291	lm	ll	ll	lm	lm	lm	lm	lm	lm	ll	ll	lm	lm	--	lm	lm	ll	lm	lm	--	lm	ll	lm	ll	lm	lm	--	lm	ll	lm	lm	lm	lm	lm	--	lm	lm	lm	lm	lm	lm	lm	--	lm	ll	lm
560	LG3	M03494	54.409	nn	np	np	nn	nn	nn	nn	--	np	np	np	nn	np	np	nn	nn	np	nn	np	nn	nn	np	nn	np	nn	nn	nn	nn	np	nn	--	np	np	nn	nn	nn	np	nn	nn	--	nn	nn	nn	nn	np	np
561	LG3	M64201	54.551	lm	ll	ll	lm	lm	lm	lm	lm	lm	ll	ll	lm	lm	lm	lm	lm	ll	lm	lm	lm	lm	ll	lm	ll	lm	lm	lm	lm	ll	lm	ll	lm	lm	--	--	lm	lm	lm	lm	lm	lm	lm	lm	lm	ll	lm
562	LG3	M09943	55.456	nn	np	np	nn	nn	nn	nn	np	np	np	np	nn	np	np	nn	nn	np	nn	np	nn	nn	np	nn	np	nn	nn	nn	nn	np	nn	nn	np	np	nn	nn	nn	--	nn	nn	nn	nn	nn	nn	nn	np	np
563	LG3	M02487	56.407	nn	np	np	nn	nn	nn	nn	--	np	np	np	nn	np	np	nn	nn	np	nn	np	nn	nn	np	nn	np	nn	nn	nn	nn	np	nn	nn	np	np	nn	nn	nn	--	nn	nn	nn	nn	nn	nn	nn	np	np
564	LG3	M05948	57.51	lm	ll	lm	lm	lm	lm	lm	ll	lm	--	lm	ll	lm	lm	lm	ll	lm	lm	lm	lm	lm	lm	ll	lm	ll	ll	lm	ll	lm	--	lm	lm	lm	lm	lm	lm	lm	ll	ll	ll	lm	ll	lm	lm	lm	lm
565	LG3	M07463	58.052	lm	ll	lm	ll	lm	--	--	lm	lm	lm	lm	lm	lm	lm	--	ll	lm	lm	lm	lm	ll	lm	ll	lm	ll	ll	lm	ll	lm	ll	lm	lm	--	lm	lm	ll	lm	ll	ll	lm	lm	ll	lm	lm	lm	lm
566	LG3	M62504	58.854	nn	np	--	nn	nn	nn	nn	--	--	nn	np	nn	--	np	nn	nn	np	nn	np	nn	--	np	nn	--	nn	nn	nn	nn	np	nn	nn	--	--	nn	nn	nn	np	nn	nn	np	nn	nn	nn	--	np	np
567	LG3	M04243	58.86	lm	ll	lm	ll	lm	lm	lm	ll	ll	--	--	lm	ll	ll	lm	ll	lm	--	ll	lm	ll	lm	ll	lm	ll	ll	lm	ll	lm	ll	lm	ll	ll	lm	lm	ll	ll	ll	ll	ll	lm	ll	--	ll	lm	ll
568	LG3	M62502	59.174	nn	np	--	nn	nn	nn	nn	--	--	nn	np	nn	--	np	nn	nn	np	nn	np	nn	--	np	nn	--	nn	nn	nn	nn	np	nn	nn	--	--	nn	nn	nn	np	nn	nn	np	nn	nn	nn	--	np	np
569	LG3	M62500	59.227	nn	np	--	nn	nn	nn	nn	--	--	nn	np	nn	--	np	nn	nn	np	--	np	nn	--	np	nn	--	nn	nn	nn	nn	np	nn	nn	--	--	nn	nn	nn	np	nn	nn	np	nn	nn	nn	--	np	np
570	LG3	cms13353	59.381	nn	np	np	np	nn	nn	nn	np	np	nn	nn	nn	np	np	nn	np	nn	nn	np	nn	np	nn	np	nn	np	np	nn	np	nn	np	nn	np	np	nn	nn	nn	np	np	np	nn	nn	--	nn	nn	nn	np
571	LG3	M56806	60.2	nn	np	np	nn	nn	nn	nn	np	np	np	np	nn	np	np	nn	nn	np	nn	np	nn	np	np	nn	np	nn	nn	nn	nn	np	nn	nn	np	np	nn	nn	nn	--	nn	nn	np	nn	nn	nn	np	np	np
572	LG3	cms13376	60.703	hk	hk	hh	hk	hk	hk	hk	--	hk	kk	kk	hk	hk	hk	hk	hh	hk	hk	hk	hk	hk	kk	hh	kk	hh	--	kk	--	kk	hh	hk	hk	hk	hk	kk	hk	kk	hh	hh	--	hk	hh	hk	kk	kk	hk
573	LG3	M71597	60.874	hk	hk	kk	hk	hk	hk	hk	hk	hk	kk	kk	hk	hk	hk	hk	hh	hk	hk	hk	hk	hk	kk	hh	kk	hh	hh	hk	hh	kk	--	k-	hk	hk	hk	hk	hk	hk	hh	hh	hk	hk	hh	hk	kk	kk	hk
574	LG3	cms13341	61.253	lm	ll	ll	ll	lm	lm	lm	ll	ll	lm	lm	lm	ll	ll	lm	ll	lm	lm	ll	lm	ll	lm	ll	lm	ll	--	--	ll	lm	ll	lm	ll	ll	lm	lm	lm	ll	ll	lm	--	lm	ll	lm	lm	lm	ll
575	LG3	M05967	62.156	lm	ll	lm	lm	lm	lm	lm	ll	ll	lm	lm	lm	ll	ll	lm	ll	--	ll	ll	lm	ll	lm	ll	lm	ll	ll	lm	ll	lm	--	lm	ll	ll	lm	lm	lm	ll	ll	ll	ll	lm	ll	lm	lm	lm	ll
576	LG3	M05747	62.342	lm	ll	lm	lm	lm	lm	lm	ll	ll	lm	lm	lm	ll	ll	lm	ll	--	ll	ll	lm	ll	lm	ll	lm	ll	ll	lm	ll	lm	--	lm	ll	ll	lm	lm	lm	ll	ll	ll	ll	lm	ll	lm	lm	lm	ll
577	LG3	M01517	62.414	lm	ll	lm	lm	lm	lm	lm	ll	ll	lm	lm	lm	ll	ll	lm	ll	--	ll	ll	lm	ll	lm	ll	lm	ll	ll	lm	ll	lm	--	lm	ll	ll	lm	lm	lm	ll	ll	ll	ll	lm	ll	lm	lm	lm	ll
578	LG3	M08675	62.729	nn	np	np	nn	--	--	np	nn	np	np	np	np	nn	--	np	nn	np	nn	np	nn	--	nn	nn	np	nn	nn	nn	np	np	nn	--	nn	np	np	np	--	--	nn	--	--	np	nn	--	np	np	np
579	LG3	M04574	63.524	lm	ll	lm	lm	lm	lm	lm	ll	ll	lm	lm	lm	ll	ll	lm	ll	--	ll	ll	lm	ll	lm	--	lm	ll	ll	lm	ll	lm	--	lm	ll	ll	lm	lm	lm	ll	ll	ll	ll	lm	ll	lm	lm	lm	ll
580	LG3	M00539	63.851	hk	hk	kk	hk	hk	hk	kk	h-	hk	kk	kk	kk	h-	hk	hk	hh	k-	hk	hk	hk	k-	kk	hh	kk	hh	hh	hk	hk	kk	hh	--	hk	hk	kk	hk	hk	--	hh	hk	hk	hk	hk	hk	kk	kk	hk
581	LG3	M06211	64.505	lm	ll	lm	ll	lm	lm	lm	ll	ll	lm	lm	lm	ll	ll	lm	ll	lm	lm	ll	lm	ll	lm	ll	lm	ll	ll	lm	ll	lm	ll	lm	ll	ll	lm	lm	lm	ll	ll	ll	ll	lm	ll	lm	lm	lm	ll
582	LG3	M04998	65.319	nn	np	np	np	nn	nn	np	np	np	--	np	nn	nn	np	nn	nn	nn	nn	np	nn	np	np	nn	np	nn	nn	nn	np	np	nn	nn	np	np	np	nn	nn	np	nn	nn	np	nn	nn	nn	np	np	np
583	LG3	cms13390	65.545	nn	np	nn	np	nn	nn	np	--	np	np	np	nn	nn	np	nn	nn	nn	nn	np	nn	np	np	nn	np	nn	nn	nn	np	np	nn	nn	np	np	np	nn	nn	np	nn	nn	nn	nn	nn	nn	np	np	np
584	LG3	M51333	66.033	lm	ll	lm	ll	lm	lm	--	ll	ll	--	lm	lm	ll	ll	lm	--	lm	--	ll	lm	ll	--	ll	lm	ll	ll	--	ll	lm	--	--	ll	--	ll	lm	lm	lm	ll	--	--	lm	ll	--	lm	--	ll
585	LG3	M10506	66.087	nn	np	nn	--	nn	nn	nn	nn	--	nn	nn	--	nn	nn	np	np	--	np	np	np	--	nn	np	nn	np	np	np	np	nn	np	--	np	nn	nn	nn	nn	nn	np	np	np	--	np	--	nn	np	np
586	LG3	M71668	66.295	lm	ll	lm	lm	lm	lm	lm	ll	ll	--	lm	lm	ll	--	lm	ll	ll	lm	ll	lm	ll	lm	ll	lm	ll	ll	lm	ll	lm	--	--	ll	ll	lm	--	lm	--	ll	lm	ll	lm	ll	lm	lm	lm	ll
587	LG3	M71669	67.076	lm	ll	lm	lm	lm	lm	lm	ll	ll	--	lm	lm	ll	--	lm	ll	ll	lm	ll	lm	ll	lm	ll	lm	ll	ll	lm	ll	lm	--	--	ll	ll	lm	--	lm	--	ll	lm	ll	lm	ll	lm	lm	lm	ll
588	LG3	M03842	67.165	nn	np	np	np	nn	nn	np	np	np	--	np	nn	nn	nn	nn	nn	nn	--	np	nn	np	np	nn	np	nn	nn	nn	np	np	--	nn	np	np	--	nn	nn	np	nn	nn	np	nn	nn	nn	--	nn	np
589	LG3	M00010	67.657	nn	np	--	np	nn	nn	np	np	np	np	np	nn	nn	--	nn	--	nn	--	np	nn	np	nn	nn	np	nn	nn	nn	np	np	--	--	np	--	np	nn	nn	np	nn	nn	np	nn	nn	nn	np	nn	np
590	LG3	M08053	67.733	lm	ll	lm	ll	lm	lm	lm	ll	ll	lm	lm	lm	ll	ll	lm	ll	lm	lm	ll	lm	ll	lm	ll	lm	ll	ll	lm	ll	lm	ll	lm	ll	ll	lm	lm	lm	lm	ll	lm	ll	lm	ll	lm	lm	lm	ll
591	LG3	M04365	67.916	nn	np	--	np	nn	nn	np	np	np	np	np	nn	nn	--	nn	--	nn	--	np	nn	np	nn	nn	np	nn	nn	nn	np	np	--	--	np	np	np	nn	nn	np	nn	nn	np	nn	nn	nn	np	nn	np
592	LG3	M02798	68.12	lm	ll	lm	ll	--	lm	lm	ll	ll	lm	lm	lm	ll	ll	lm	ll	lm	lm	ll	lm	ll	lm	ll	lm	ll	ll	lm	ll	lm	ll	lm	ll	ll	lm	lm	lm	lm	ll	lm	ll	lm	ll	lm	lm	lm	ll
593	LG3	M05263	68.123	nn	np	--	np	nn	nn	np	np	np	np	np	nn	nn	--	nn	--	nn	--	np	nn	np	nn	nn	np	nn	nn	nn	np	np	--	--	np	--	np	nn	nn	np	nn	nn	np	nn	nn	nn	np	nn	np
594	LG3	M08511	68.82	lm	ll	ll	lm	--	ll	--	lm	lm	ll	ll	ll	lm	lm	--	lm	lm	ll	lm	ll	lm	--	lm	ll	lm	lm	ll	lm	ll	lm	ll	lm	--	ll	ll	--	ll	lm	ll	--	ll	lm	ll	ll	ll	lm
595	LG3	M05729	68.915	nn	np	np	nn	nn	nn	np	np	np	np	np	nn	nn	np	nn	nn	nn	nn	np	nn	--	--	nn	np	nn	nn	nn	np	np	nn	nn	np	np	np	nn	nn	np	nn	nn	np	nn	nn	nn	np	nn	np
596	LG3	M71185	69.169	nn	np	np	nn	nn	nn	np	np	np	--	np	nn	nn	np	nn	nn	nn	--	np	nn	np	np	nn	np	nn	nn	nn	np	np	nn	nn	np	np	np	nn	nn	np	nn	nn	np	nn	nn	nn	np	nn	np
597	LG3	M05994	69.651	hk	hk	kk	hk	hk	hk	kk	h-	hk	--	kk	hk	hk	hk	hk	hh	hk	hh	hk	hk	hk	kk	hh	kk	hh	hh	hk	hk	kk	hh	k-	hk	hk	kk	hk	hk	kk	hh	hk	hk	hk	hh	hk	kk	hk	hk
598	LG3	M00894	69.946	lm	ll	lm	lm	lm	lm	lm	ll	ll	lm	lm	lm	lm	ll	lm	ll	lm	ll	ll	lm	ll	lm	--	lm	ll	ll	lm	ll	lm	ll	lm	ll	ll	lm	lm	lm	lm	ll	lm	ll	lm	ll	lm	lm	lm	ll
599	LG3	M09900	70.177	nn	np	nn	--	np	np	nn	np	--	nn	nn	np	np	nn	np	np	np	np	np	np	np	nn	np	nn	np	np	--	--	nn	np	--	--	--	nn	nn	--	nn	np	np	--	np	np	nn	nn	np	nn
600	LG3	M05783	70.556	hk	hk	hh	hk	hk	hk	hh	hk	hk	hh	hh	hk	hk	hk	hk	kk	k-	--	hk	hk	hk	hh	kk	hh	kk	kk	hk	hk	hh	kk	hk	hk	hk	hh	hk	hk	hh	kk	hk	hk	hk	kk	hk	hh	hk	hk
601	LG3	M08266	70.663	hk	hk	kk	hk	hk	hk	kk	hk	hk	kk	kk	hk	hk	hk	hk	hh	h-	--	hk	hk	hk	kk	hh	kk	hh	hh	hk	hk	kk	hh	hk	hk	hk	kk	hk	hk	kk	hh	hk	hk	hk	hh	hk	kk	hk	hk
602	LG3	M63412	70.985	hk	hk	kk	hh	hk	hk	kk	hk	hk	kk	kk	hk	hk	hk	hk	hh	hk	hk	hk	hk	hk	kk	hh	kk	hh	hh	k-	hk	kk	--	hk	hk	hk	kk	hk	hk	kk	hh	hk	hk	hk	hh	hk	kk	hk	hk
603	LG3	M05419	71.096	nn	np	np	np	nn	nn	np	--	np	np	np	nn	nn	--	nn	nn	nn	nn	np	nn	np	np	nn	np	nn	nn	nn	np	np	nn	nn	np	np	np	nn	nn	np	nn	nn	np	nn	nn	nn	np	nn	np
604	LG3	M09300	71.197	lm	ll	ll	lm	lm	--	ll	--	--	ll	ll	--	lm	lm	lm	lm	lm	lm	lm	--	lm	ll	lm	ll	lm	lm	lm	lm	ll	lm	lm	lm	lm	ll	ll	lm	ll	lm	lm	ll	--	lm	ll	ll	--	ll
605	LG3	M64668	71.452	hk	hk	kk	--	hk	hk	kk	hk	hk	kk	kk	hk	hk	hk	hk	hh	hk	hk	hk	hk	hk	kk	hh	kk	hh	hh	hk	hk	kk	hh	hk	hk	hk	kk	hk	hk	--	hh	hk	--	hk	hh	hk	kk	hk	hk
606	LG3	M64667	71.463	hk	hk	hh	hk	hk	hk	hh	hk	hk	hh	hh	hk	hk	hk	hk	kk	hk	hk	hk	hk	hk	hh	kk	hh	kk	kk	hk	hk	hh	kk	hk	hk	hk	hh	hk	hk	--	kk	hk	--	hk	kk	hk	hh	hk	hk
607	LG3	M64666	71.484	hk	hk	hh	hk	hk	hk	hh	hk	hk	hh	hh	hk	hk	hk	hk	kk	hk	hk	hk	hk	hk	hh	kk	hh	kk	kk	hk	hk	hh	kk	hk	hk	hk	hh	hk	hk	--	kk	hk	--	hk	kk	hk	hh	hk	hk
608	LG3	M58657	71.749	nn	np	np	nn	nn	nn	np	np	np	--	np	nn	nn	np	nn	nn	nn	np	np	nn	np	np	nn	np	nn	nn	nn	np	np	nn	nn	np	np	np	nn	nn	--	nn	nn	np	nn	nn	nn	np	nn	np
609	LG3	M73390	71.985	lm	ll	ll	lm	lm	lm	ll	lm	lm	ll	ll	lm	lm	lm	lm	lm	lm	lm	lm	lm	lm	ll	lm	ll	lm	lm	lm	lm	ll	lm	ll	--	lm	ll	--	lm	ll	lm	lm	lm	--	lm	--	ll	lm	ll
610	LG3	M08557	72.027	nn	np	np	nn	nn	nn	np	--	np	--	np	nn	nn	np	nn	nn	nn	--	np	nn	np	--	nn	--	nn	nn	nn	np	--	nn	nn	np	--	np	nn	nn	np	nn	nn	np	nn	nn	nn	np	nn	np
611	LG3	M10554	72.173	hk	hk	kk	hk	hk	hk	kk	hk	hk	kk	kk	hk	hk	hk	hk	hh	h-	--	hk	hk	hk	kk	hh	kk	hh	hh	hk	hk	kk	hh	hk	hk	hk	kk	hk	hk	kk	hh	hk	hk	hk	hh	hk	kk	hk	hk
612	LG3	M71268	72.53	hk	hk	kk	hh	hk	k-	kk	h-	hk	kk	kk	hk	hk	hk	hk	hh	hk	hk	hk	hk	hk	kk	hh	kk	hh	hh	hk	hk	kk	hh	--	hk	hk	kk	hk	hk	kk	hh	hk	hk	hk	hh	h-	kk	h-	hk
613	LG3	M71267	72.629	hk	hk	kk	hh	hk	k-	kk	h-	hk	kk	kk	hk	hk	hk	hk	hh	hk	hk	hk	hk	hk	kk	hh	kk	hh	hh	hk	hk	kk	hh	--	hk	hk	kk	hk	hk	kk	hh	hk	hk	hk	hh	h-	kk	h-	hk
614	LG3	M71998	73.089	nn	np	np	np	nn	nn	--	np	np	--	np	nn	nn	--	nn	--	--	--	np	nn	np	np	nn	np	nn	nn	--	np	np	--	--	np	--	--	nn	nn	--	nn	nn	np	nn	nn	nn	np	nn	np
615	LG3	M03764	73.263	hk	hk	hh	hk	hk	hk	hh	hk	hk	hh	hh	hk	hk	--	hk	kk	hk	hk	hk	hk	hk	hh	kk	hh	kk	kk	hk	hk	hh	kk	hk	hk	hk	hh	hh	hk	hh	kk	hk	hk	hk	kk	hk	hh	hk	hk
616	LG3	M11168	73.286	hk	hk	kk	hk	hk	hk	kk	hk	hk	kk	kk	hk	hk	--	hk	hh	hk	hk	hk	hk	hk	kk	hh	kk	hh	hh	hk	hk	kk	hh	hk	hk	hk	kk	kk	hk	kk	hh	hk	hk	hk	hh	hk	kk	hk	hk
617	LG3	M54164	73.784	hk	hk	kk	hh	hk	hk	kk	hk	hk	--	kk	hk	hk	k-	hk	hh	hk	k-	hk	hk	hk	kk	hh	kk	hh	hh	--	hk	kk	hh	hk	hk	hk	kk	k-	hk	kk	hh	hk	hk	hk	hh	hk	kk	hk	hk
618	LG3	M55697	73.916	nn	np	np	nn	nn	nn	--	np	np	--	np	nn	nn	np	nn	nn	nn	--	np	nn	np	np	nn	np	nn	nn	nn	np	np	--	nn	np	np	np	nn	nn	--	nn	nn	np	--	nn	--	np	np	np
619	LG3	M52426	74.195	nn	np	np	nn	nn	nn	np	--	np	np	np	nn	nn	np	nn	nn	nn	--	np	nn	np	np	nn	np	nn	nn	nn	np	np	nn	nn	np	np	np	nn	nn	np	nn	nn	np	nn	nn	nn	np	nn	np
620	LG3	M61359	74.515	nn	np	np	nn	nn	nn	np	np	np	np	np	nn	nn	np	nn	nn	nn	nn	np	nn	np	np	nn	np	nn	nn	nn	np	np	nn	nn	np	np	np	nn	nn	np	nn	nn	np	nn	nn	nn	np	nn	np
621	LG3	M12108	74.728	nn	np	np	nn	nn	nn	np	np	np	--	np	nn	nn	np	nn	nn	nn	--	np	nn	np	np	nn	np	nn	nn	nn	np	np	nn	nn	np	np	np	nn	--	np	nn	nn	np	nn	nn	nn	np	nn	np
622	LG3	M54450	74.797	lm	ll	lm	lm	lm	lm	lm	ll	ll	lm	lm	lm	lm	ll	lm	ll	lm	--	ll	lm	ll	lm	ll	lm	ll	ll	lm	ll	lm	ll	lm	ll	ll	lm	lm	lm	lm	ll	lm	ll	lm	ll	lm	lm	lm	ll
623	LG3	M02163	75.014	hk	hk	kk	hk	hk	hk	kk	hk	hk	kk	kk	hk	hk	hk	hk	hh	hk	k-	hk	hk	hk	kk	hh	kk	hh	hh	hk	hk	kk	hh	kk	hk	hk	kk	hk	hk	kk	hh	hk	hk	hk	hh	hk	kk	hk	kk
624	LG3	M01380	75.184	hk	hk	hh	hk	hk	hk	hh	hk	hk	hh	hh	hk	hk	hk	hk	kk	hk	h-	hk	hk	hk	hh	kk	hh	kk	kk	hk	hk	hh	kk	hh	hk	hk	hh	hk	hk	hh	kk	hk	hk	hk	kk	hh	hh	hk	hh
625	LG3	M58656	75.602	lm	ll	lm	lm	lm	lm	lm	ll	ll	--	lm	lm	lm	ll	lm	ll	lm	lm	ll	lm	ll	lm	ll	lm	ll	ll	lm	ll	lm	ll	lm	ll	ll	lm	lm	lm	--	ll	lm	ll	lm	ll	lm	lm	lm	ll
626	LG3	M72545	75.919	hk	hk	kk	hk	hk	hk	--	hk	hk	--	k-	hh	hk	kk	hk	hh	hk	--	hk	hk	hk	kk	hh	kk	hh	hh	hk	hk	kk	hh	hk	hk	hk	kk	hk	hk	k-	hh	hk	hk	hk	hh	hk	kk	hk	kk
627	LG3	M72548	75.964	hk	hk	kk	hk	hk	hk	--	hk	hk	--	k-	hh	hk	kk	hk	hh	hk	--	hk	hk	hk	kk	hh	kk	hh	hh	hk	hk	kk	hh	hk	hk	hk	kk	hk	hk	k-	hh	hk	h-	hk	hh	hk	kk	hk	kk
628	LG3	M72544	76.11	hk	hk	kk	hk	hk	hk	--	hk	hk	--	k-	hh	hk	kk	hk	hh	hk	--	hk	hk	hk	kk	hh	kk	hh	hh	hk	hk	kk	hh	hk	hk	hk	kk	hk	hk	--	hh	hk	h-	hk	hh	hk	k-	hk	kk
629	LG3	M53360	76.679	lm	ll	lm	ll	lm	lm	lm	ll	ll	lm	lm	lm	lm	ll	lm	ll	lm	--	ll	lm	ll	lm	ll	lm	ll	ll	lm	ll	lm	ll	lm	ll	ll	lm	lm	lm	lm	ll	lm	--	lm	ll	lm	lm	lm	ll
630	LG3	M72377	76.871	lm	ll	lm	ll	lm	lm	lm	ll	ll	lm	lm	ll	lm	--	lm	ll	lm	--	ll	lm	ll	lm	ll	lm	ll	ll	lm	ll	lm	ll	lm	ll	ll	lm	lm	lm	--	ll	lm	ll	lm	ll	lm	lm	lm	ll
631	LG3	M72547	77.188	hk	hk	kk	hk	hk	hk	--	hk	hk	--	k-	hh	hk	kk	hk	hh	hk	--	hk	hk	hk	kk	hh	kk	hh	hh	hk	hk	kk	hh	hk	hk	hk	kk	hk	hk	hk	hh	hk	hh	hk	hh	hk	k-	hk	kk
632	LG3	M72546	77.27	hk	hk	kk	hk	hk	hk	--	hk	hk	--	k-	hh	hk	kk	hk	hh	hk	--	hk	hk	hk	kk	hh	kk	hh	hh	hk	hk	kk	hh	hk	hk	hk	kk	hk	hk	hk	hh	hk	hh	hk	hh	hk	k-	hk	kk
633	LG3	M62526	77.592	lm	ll	lm	ll	--	lm	lm	ll	ll	lm	lm	lm	--	ll	lm	ll	lm	lm	ll	lm	ll	lm	ll	lm	ll	ll	lm	ll	lm	ll	--	ll	ll	lm	lm	lm	lm	ll	lm	ll	lm	ll	lm	lm	lm	ll
634	LG3	M51055	77.971	nn	np	np	nn	nn	nn	np	nn	np	np	np	nn	nn	np	nn	nn	nn	nn	np	nn	np	np	nn	np	nn	nn	nn	np	np	nn	--	np	np	np	nn	nn	np	nn	nn	np	nn	nn	nn	np	nn	np
635	LG3	M51056	77.972	nn	np	np	nn	nn	nn	np	nn	np	--	np	nn	nn	np	nn	nn	nn	nn	np	nn	np	np	nn	np	nn	nn	nn	np	np	nn	--	np	np	np	nn	nn	np	nn	nn	np	nn	nn	nn	np	nn	np
636	LG3	M10394	78.124	lm	ll	lm	lm	lm	lm	lm	ll	ll	--	lm	lm	lm	ll	lm	ll	lm	--	ll	lm	ll	lm	ll	lm	ll	ll	lm	ll	lm	ll	lm	ll	ll	lm	lm	lm	--	ll	lm	--	lm	ll	lm	lm	lm	lm
637	LG3	M63080	78.779	lm	ll	lm	ll	lm	lm	lm	ll	ll	--	lm	lm	lm	ll	lm	ll	--	--	ll	lm	ll	lm	ll	lm	ll	ll	lm	ll	lm	ll	lm	ll	ll	lm	lm	lm	lm	ll	lm	ll	lm	ll	lm	lm	lm	lm
638	LG3	M04748	78.813	nn	np	np	nn	nn	nn	np	nn	np	np	np	nn	nn	np	nn	nn	nn	np	np	nn	np	np	nn	np	nn	nn	nn	np	np	nn	nn	np	np	np	nn	nn	np	nn	nn	np	nn	nn	nn	np	nn	np
639	LG3	M63079	78.928	lm	ll	lm	ll	lm	lm	lm	ll	ll	--	lm	lm	lm	ll	lm	ll	--	--	ll	lm	ll	lm	ll	lm	ll	ll	lm	ll	lm	ll	lm	ll	ll	lm	lm	lm	lm	ll	lm	ll	lm	ll	lm	lm	lm	lm
640	LG3	M09750	78.948	nn	np	np	nn	nn	nn	np	nn	np	np	np	nn	nn	np	nn	nn	nn	np	np	nn	np	np	nn	np	nn	nn	nn	np	np	nn	nn	np	np	np	nn	nn	np	nn	nn	np	nn	nn	nn	np	nn	np
641	LG3	M08460	79.183	lm	ll	lm	ll	lm	lm	lm	ll	ll	lm	lm	lm	lm	ll	lm	ll	lm	--	ll	lm	ll	lm	ll	lm	ll	ll	lm	ll	lm	ll	lm	ll	ll	lm	lm	lm	lm	ll	lm	ll	lm	ll	--	lm	lm	lm
642	LG3	M11175	79.584	nn	np	np	np	nn	nn	np	nn	np	np	np	nn	nn	np	nn	nn	nn	np	np	nn	np	np	nn	np	nn	nn	nn	np	np	nn	nn	np	np	np	nn	nn	np	nn	nn	np	nn	nn	nn	np	nn	np
643	LG3	M55900	80.048	nn	np	nn	nn	--	--	nn	np	np	nn	nn	--	--	--	--	np	nn	--	np	nn	np	nn	np	--	np	np	nn	np	nn	np	--	np	np	nn	nn	nn	np	np	--	np	--	np	np	nn	nn	np
644	LG3	M05981	80.065	lm	ll	lm	ll	lm	lm	--	ll	ll	--	lm	lm	lm	--	lm	ll	--	--	ll	lm	ll	lm	ll	lm	ll	ll	lm	ll	lm	ll	--	ll	--	lm	lm	lm	--	ll	lm	ll	lm	ll	lm	lm	lm	ll
645	LG3	M66818	80.563	nn	np	--	nn	nn	--	--	--	np	--	np	nn	nn	--	nn	nn	nn	--	np	nn	--	np	--	--	nn	nn	nn	np	--	--	nn	np	--	np	nn	nn	np	nn	nn	--	nn	nn	nn	np	nn	np
646	LG3	M66817	80.723	nn	np	--	nn	nn	nn	--	--	np	--	np	nn	nn	--	nn	nn	nn	--	np	nn	--	np	--	--	nn	nn	nn	np	--	--	nn	np	--	np	nn	nn	np	nn	nn	--	nn	nn	nn	np	nn	np
647	LG3	M53872	81.331	lm	ll	lm	ll	lm	lm	lm	ll	ll	lm	lm	lm	lm	ll	lm	ll	lm	--	ll	lm	ll	lm	ll	lm	ll	ll	lm	ll	lm	ll	lm	ll	ll	lm	lm	lm	lm	ll	lm	ll	lm	ll	lm	lm	lm	lm
648	LG3	M55896	81.643	nn	np	nn	nn	nn	--	nn	np	np	--	nn	nn	nn	--	nn	np	nn	nn	np	nn	np	nn	nn	nn	np	np	nn	np	nn	np	--	np	np	nn	nn	nn	nn	np	nn	np	nn	np	nn	nn	nn	np
649	LG3	M54747	81.662	nn	np	np	nn	nn	nn	--	np	np	np	np	nn	nn	np	nn	nn	nn	--	np	--	np	np	nn	np	nn	nn	nn	np	np	nn	nn	np	np	np	nn	nn	np	nn	nn	np	nn	nn	nn	--	nn	np
650	LG3	M04314	83.058	nn	np	np	nn	nn	nn	np	nn	np	np	np	nn	nn	np	nn	nn	nn	np	np	nn	np	np	nn	nn	nn	nn	nn	np	np	nn	nn	np	np	np	nn	nn	np	nn	nn	np	nn	nn	np	np	nn	np
651	LG3	M11294	83.661	nn	np	np	nn	nn	nn	np	nn	np	np	np	nn	nn	np	nn	nn	nn	np	np	nn	np	np	nn	nn	nn	nn	nn	np	np	nn	nn	np	np	np	nn	nn	np	nn	nn	np	nn	nn	--	np	nn	np
652	LG3	M03772	83.836	nn	np	np	nn	nn	nn	np	nn	np	np	np	nn	nn	np	nn	nn	nn	np	np	nn	np	np	nn	nn	nn	nn	nn	np	np	nn	nn	np	np	np	nn	nn	np	nn	nn	np	nn	nn	np	np	nn	np
653	LG3	M01758	84.331	hk	hk	kk	hh	hk	hk	kk	hk	hk	kk	kk	hk	hk	hk	hk	hh	hh	--	hk	hk	hk	kk	hh	hk	hh	hh	hk	hk	kk	hh	k-	hk	hk	kk	hk	hk	kk	hh	hk	hk	hk	hh	kk	kk	hk	kk
654	LG3	M10086	84.331	hk	hk	hh	kk	hk	hk	hh	hk	hk	hh	hh	hk	hk	hk	hk	kk	kk	--	hk	hk	hk	hh	kk	hk	kk	kk	hk	hk	hh	kk	h-	hk	hk	hh	hk	hk	hh	kk	hk	hk	hk	kk	hh	hh	hk	hh
655	LG3	M53785	85.441	lm	ll	lm	lm	lm	lm	lm	lm	lm	lm	lm	lm	lm	lm	lm	ll	lm	lm	ll	lm	ll	lm	ll	lm	ll	lm	lm	lm	lm	lm	lm	lm	lm	lm	lm	lm	--	ll	lm	ll	lm	ll	lm	lm	lm	lm
656	LG3	M64136	85.457	nn	np	np	np	nn	nn	np	nn	np	--	np	nn	nn	--	nn	nn	nn	--	np	nn	np	np	nn	nn	nn	nn	nn	np	np	nn	nn	np	np	np	nn	nn	np	nn	nn	nn	nn	nn	np	np	nn	np
657	LG3	M02983	85.898	nn	np	--	nn	nn	nn	--	nn	np	np	np	nn	nn	np	nn	nn	nn	--	np	nn	np	np	nn	nn	nn	nn	nn	--	np	nn	nn	np	np	np	nn	nn	np	nn	nn	np	nn	nn	np	np	nn	np
658	LG3	M05406	86.831	nn	np	nn	np	np	--	nn	np	np	nn	nn	np	nn	np	np	np	np	nn	nn	np	--	nn	np	np	np	np	nn	--	nn	np	np	--	np	nn	np	np	nn	np	np	np	np	np	nn	nn	nn	nn
659	LG3	M68124	87.319	lm	ll	lm	ll	lm	lm	lm	ll	ll	--	lm	lm	lm	ll	lm	ll	ll	--	lm	lm	ll	lm	ll	lm	ll	ll	lm	ll	lm	ll	lm	ll	ll	lm	lm	lm	--	ll	lm	ll	lm	ll	--	lm	lm	lm
660	LG3	M68125	87.674	nn	np	np	nn	nn	nn	np	nn	np	--	np	nn	nn	np	nn	nn	nn	nn	np	nn	np	np	nn	nn	nn	nn	np	np	np	nn	nn	np	nn	np	nn	nn	--	nn	nn	np	nn	nn	--	np	nn	np
661	LG3	M61789	87.763	lm	ll	lm	lm	lm	lm	lm	ll	ll	lm	lm	lm	lm	ll	lm	ll	ll	lm	lm	lm	ll	--	ll	lm	ll	ll	lm	ll	lm	ll	lm	ll	ll	lm	lm	lm	lm	ll	lm	ll	lm	ll	lm	lm	lm	lm
662	LG3	M09971	88.131	lm	ll	lm	lm	lm	lm	lm	ll	ll	lm	lm	--	lm	ll	lm	ll	ll	lm	--	lm	ll	--	ll	lm	ll	ll	--	ll	lm	ll	lm	ll	ll	lm	lm	lm	--	ll	lm	ll	lm	ll	lm	lm	lm	lm
663	LG3	M70477	88.258	nn	np	--	nn	nn	nn	np	nn	np	np	np	nn	nn	np	nn	nn	nn	--	np	nn	nn	np	nn	nn	nn	nn	--	np	np	nn	nn	np	nn	np	nn	nn	--	nn	nn	np	nn	nn	np	np	nn	--
664	LG3	M01932	88.618	hk	hk	hh	kk	hk	hk	hh	kk	hk	hh	hh	hk	hk	hk	hk	kk	kk	hh	hh	hk	hk	hh	kk	hk	kk	kk	hh	hk	hh	kk	hk	hk	hk	hh	hk	k-	hh	kk	hk	hk	hk	kk	hh	hh	hk	hh
665	LG3	M56489	88.65	lm	ll	lm	ll	lm	lm	lm	--	ll	lm	lm	lm	lm	ll	lm	ll	ll	lm	lm	lm	ll	lm	ll	lm	ll	ll	lm	ll	lm	ll	lm	ll	ll	lm	lm	lm	--	ll	lm	ll	lm	ll	lm	lm	lm	lm
666	LG3	M07428	89.049	nn	np	--	np	nn	nn	np	nn	np	np	np	nn	nn	--	nn	nn	nn	np	np	nn	np	np	nn	nn	nn	nn	nn	np	np	--	nn	--	np	np	nn	nn	--	nn	nn	--	nn	nn	np	np	nn	np
667	LG3	M11190	89.341	nn	np	--	np	nn	nn	np	nn	np	np	np	nn	nn	--	nn	nn	nn	np	np	nn	np	--	nn	nn	nn	nn	nn	np	np	--	nn	--	np	np	nn	nn	--	nn	nn	--	nn	nn	np	np	nn	np
668	LG3	M12443	89.656	lm	ll	--	ll	lm	ll	lm	--	ll	--	lm	--	lm	ll	lm	--	--	--	--	lm	ll	lm	ll	--	ll	ll	lm	ll	lm	--	lm	ll	ll	lm	lm	lm	lm	ll	lm	ll	lm	ll	lm	lm	lm	lm
669	LG3	M11273	89.863	lm	ll	--	ll	lm	ll	lm	--	ll	--	lm	--	lm	ll	lm	--	--	--	--	lm	ll	lm	ll	--	ll	ll	lm	ll	lm	--	lm	ll	ll	lm	lm	lm	lm	ll	lm	ll	lm	ll	lm	lm	lm	lm
670	LG3	M55832	90.573	nn	np	np	nn	nn	nn	np	nn	np	np	np	nn	nn	np	nn	nn	nn	--	np	nn	np	np	nn	nn	nn	np	np	np	np	nn	nn	np	nn	np	nn	nn	np	nn	nn	np	nn	nn	np	np	nn	np
671	LG3	M61943	90.87	lm	ll	--	ll	--	lm	--	ll	ll	--	--	lm	lm	ll	--	ll	lm	ll	ll	ll	ll	lm	ll	lm	ll	ll	--	ll	lm	ll	ll	ll	ll	lm	lm	--	lm	ll	lm	ll	lm	ll	--	ll	lm	lm
672	LG3	M50450	91.45	nn	np	np	nn	--	np	nn	nn	nn	nn	nn	np	np	nn	np	nn	np	--	nn	np	nn	np	nn	np	nn	nn	np	nn	np	nn	--	nn	nn	--	np	np	--	--	--	nn	--	nn	--	np	np	nn
673	LG3	M00168	91.514	nn	np	np	np	nn	nn	np	--	np	np	np	nn	nn	--	nn	nn	--	np	--	nn	nn	np	nn	nn	nn	np	nn	np	np	--	nn	np	nn	np	nn	np	--	nn	nn	--	nn	np	--	np	nn	np
674	LG3	M06062	91.916	lm	ll	ll	lm	lm	lm	lm	ll	ll	lm	lm	lm	lm	ll	lm	ll	ll	lm	lm	lm	ll	lm	ll	lm	ll	ll	lm	ll	lm	ll	lm	ll	ll	lm	lm	lm	--	ll	lm	ll	lm	ll	lm	lm	lm	lm
675	LG3	M07287	92.186	nn	np	np	--	nn	nn	np	nn	np	np	np	nn	nn	np	nn	nn	nn	np	np	nn	np	np	nn	nn	nn	np	np	np	np	nn	nn	np	nn	np	nn	nn	np	nn	nn	np	nn	nn	np	--	nn	np
676	LG3	M63734	92.394	lm	ll	ll	ll	lm	lm	lm	ll	ll	lm	lm	lm	lm	ll	lm	ll	ll	lm	lm	lm	ll	lm	ll	lm	ll	ll	lm	ll	lm	ll	lm	ll	ll	lm	lm	lm	lm	ll	lm	ll	lm	ll	lm	lm	lm	lm
677	LG3	M05205	92.762	nn	np	np	--	nn	nn	np	--	np	np	--	nn	nn	--	nn	nn	--	np	--	nn	nn	np	nn	nn	nn	np	nn	np	np	--	nn	np	nn	np	nn	np	nn	nn	nn	--	nn	nn	--	np	nn	np
678	LG3	M02516	93.003	nn	np	np	np	nn	nn	np	--	np	np	np	nn	nn	--	nn	nn	--	np	--	nn	nn	np	nn	nn	nn	np	nn	np	np	--	nn	np	nn	np	nn	np	nn	nn	nn	--	nn	nn	--	np	nn	np
679	LG3	M04840	93.161	lm	ll	ll	lm	lm	lm	--	ll	ll	lm	lm	lm	lm	ll	lm	ll	ll	lm	--	lm	ll	ll	ll	--	ll	ll	lm	ll	lm	ll	lm	ll	ll	--	--	lm	--	ll	--	ll	lm	ll	--	--	lm	lm
680	LG3	M00195	93.338	nn	np	np	np	nn	nn	np	--	np	np	np	nn	nn	--	nn	nn	--	np	--	nn	nn	np	nn	nn	nn	np	nn	np	np	--	nn	np	nn	np	nn	np	nn	nn	nn	--	nn	nn	--	np	nn	np
681	LG3	M03963	94.208	nn	np	np	np	nn	nn	np	nn	np	np	np	nn	nn	--	nn	nn	nn	np	np	nn	np	np	nn	nn	nn	np	--	np	np	nn	nn	np	nn	np	nn	nn	np	nn	nn	np	nn	nn	np	np	nn	np
682	LG3	M01024	94.714	nn	np	np	nn	nn	nn	np	nn	np	np	np	nn	nn	np	nn	nn	nn	--	np	nn	np	np	nn	nn	nn	np	np	np	np	nn	nn	np	nn	np	nn	nn	np	nn	nn	np	nn	nn	np	np	nn	np
683	LG3	M71046	95.044	lm	ll	lm	lm	lm	lm	lm	--	ll	--	--	ll	lm	--	--	ll	--	lm	lm	lm	ll	lm	ll	lm	ll	ll	ll	ll	lm	--	--	ll	ll	--	lm	ll	--	ll	lm	lm	lm	ll	--	--	lm	--
684	LG3	M08286	95.316	nn	np	nn	np	np	np	nn	np	nn	nn	nn	--	np	np	--	--	np	nn	nn	np	nn	nn	np	--	np	nn	nn	nn	nn	np	np	nn	np	nn	np	np	nn	np	np	nn	np	np	nn	nn	np	nn
685	LG3	M55915	95.359	nn	np	--	nn	np	nn	nn	np	np	nn	nn	nn	--	--	np	np	nn	nn	np	nn	np	--	np	np	np	np	--	np	--	np	--	np	np	nn	nn	nn	--	np	nn	np	nn	np	--	--	nn	np
686	LG3	M05812	95.615	nn	np	np	nn	nn	nn	np	nn	np	np	np	nn	nn	--	nn	nn	nn	--	np	nn	np	np	nn	nn	nn	np	np	np	np	nn	nn	np	nn	np	nn	nn	np	nn	nn	np	nn	nn	np	nn	nn	np
687	LG3	M02851	96.177	lm	ll	ll	lm	lm	lm	lm	ll	ll	lm	lm	lm	lm	ll	lm	ll	ll	lm	lm	lm	ll	ll	ll	lm	ll	ll	lm	ll	lm	ll	lm	ll	ll	lm	lm	lm	--	ll	lm	ll	lm	ll	--	lm	lm	lm
688	LG3	M11021	96.203	lm	ll	ll	lm	lm	lm	lm	ll	ll	lm	lm	lm	lm	ll	lm	ll	ll	lm	lm	lm	ll	ll	ll	lm	ll	ll	lm	ll	lm	ll	lm	ll	ll	--	lm	lm	--	ll	lm	ll	lm	ll	--	lm	lm	lm
689	LG3	M11350	97.173	lm	ll	ll	ll	lm	--	lm	ll	ll	lm	lm	lm	--	--	lm	ll	ll	ll	lm	lm	ll	lm	ll	lm	ll	ll	lm	ll	lm	ll	lm	ll	ll	--	lm	lm	lm	ll	ll	lm	lm	ll	ll	lm	lm	lm
690	LG3	M09974	97.3	nn	np	nn	nn	--	np	nn	np	--	nn	nn	--	--	np	--	np	np	np	nn	np	np	nn	np	np	np	np	nn	np	nn	np	nn	np	np	nn	np	--	nn	np	nn	nn	nn	np	nn	--	np	nn
691	LG3	M69802	98.134	nn	np	np	nn	nn	nn	np	nn	np	np	np	nn	nn	np	nn	nn	nn	--	np	nn	np	np	nn	nn	nn	np	np	np	np	nn	nn	np	nn	np	nn	nn	np	nn	nn	np	nn	nn	np	np	nn	np
692	LG3	M62561	98.89	nn	np	np	nn	nn	nn	np	nn	np	--	np	nn	nn	--	nn	nn	nn	--	np	nn	np	np	nn	nn	nn	np	np	np	np	nn	nn	np	--	np	nn	nn	np	nn	nn	--	nn	nn	np	np	nn	np
693	LG3	M09272	98.943	nn	np	np	nn	nn	nn	np	nn	np	np	np	nn	nn	np	nn	nn	nn	np	np	nn	np	--	nn	nn	nn	np	np	np	np	nn	nn	np	nn	np	nn	nn	--	nn	nn	nn	nn	nn	--	np	nn	np
694	LG3	M08017	98.999	lm	ll	--	ll	lm	lm	ll	lm	--	ll	ll	lm	lm	lm	lm	lm	lm	ll	ll	--	lm	ll	lm	lm	lm	lm	ll	lm	ll	lm	--	lm	lm	ll	--	lm	ll	lm	lm	ll	lm	lm	ll	ll	lm	ll
695	LG3	M00225	99.24	hk	hk	hk	hk	hk	hk	hh	kk	hk	hh	hh	hk	hk	hk	hk	kk	kk	hh	hh	hk	hk	hh	kk	hk	kk	hk	hh	hk	hh	kk	hk	hk	kk	hh	hk	hk	hh	hk	hk	hh	hk	kk	hh	hh	hk	hh
696	LG3	M03728	99.68	nn	np	np	nn	nn	nn	np	nn	np	--	np	nn	nn	np	nn	nn	nn	--	np	nn	np	np	nn	nn	nn	np	np	np	np	nn	nn	np	nn	np	nn	nn	np	nn	--	np	nn	nn	np	np	nn	np
697	LG3	M02536	100.05	nn	np	np	nn	nn	nn	np	nn	np	--	np	nn	nn	np	nn	nn	nn	--	np	nn	np	np	nn	nn	nn	np	np	np	np	nn	nn	np	nn	np	nn	nn	np	nn	nn	np	nn	nn	np	np	nn	np
698	LG3	M53789	100.112	lm	ll	ll	lm	lm	lm	lm	ll	ll	--	lm	lm	lm	ll	lm	ll	ll	ll	lm	lm	ll	lm	ll	lm	ll	ll	lm	ll	lm	ll	lm	ll	ll	lm	lm	lm	lm	ll	lm	lm	lm	ll	lm	ll	ll	--
699	LG3	M09219	100.379	nn	np	np	nn	nn	nn	np	nn	np	--	np	nn	nn	np	nn	nn	nn	--	np	nn	np	np	nn	nn	nn	np	np	np	np	nn	nn	np	nn	np	nn	nn	np	nn	--	np	nn	nn	np	np	nn	np
700	LG3	M58224	101.1	nn	np	np	nn	nn	nn	np	nn	np	np	np	nn	nn	np	nn	--	nn	--	np	nn	np	np	nn	nn	nn	np	np	np	np	--	nn	np	nn	np	nn	nn	--	nn	nn	np	--	nn	np	np	nn	np
701	LG3	M10017	101.523	lm	ll	ll	lm	lm	lm	lm	ll	ll	lm	lm	lm	lm	--	lm	ll	ll	ll	lm	lm	ll	lm	ll	lm	ll	ll	lm	ll	lm	ll	lm	ll	ll	lm	lm	lm	lm	ll	lm	ll	lm	ll	lm	ll	ll	lm
702	LG3	M69467	101.646	nn	np	np	nn	nn	nn	np	nn	np	--	np	nn	nn	np	nn	nn	nn	--	np	nn	np	np	nn	nn	nn	np	np	np	np	nn	nn	np	nn	np	nn	nn	--	nn	nn	--	nn	nn	--	np	nn	np
703	LG3	M72372	102.029	nn	np	np	np	nn	nn	np	nn	np	--	np	nn	nn	np	nn	nn	--	--	np	nn	np	nn	nn	nn	nn	np	--	np	np	--	nn	np	nn	--	nn	nn	--	nn	nn	nn	nn	nn	np	np	nn	np
704	LG3	M06475	102.764	lm	ll	ll	lm	lm	lm	lm	ll	ll	lm	lm	lm	lm	--	lm	ll	ll	ll	lm	lm	ll	lm	ll	lm	ll	ll	lm	ll	lm	ll	lm	ll	ll	lm	lm	lm	lm	ll	lm	ll	lm	ll	lm	ll	ll	lm
705	LG3	M03631	103.181	nn	np	np	nn	nn	nn	np	nn	np	np	np	nn	nn	np	nn	nn	nn	np	np	nn	np	np	nn	nn	nn	np	np	np	np	nn	nn	np	nn	np	nn	nn	--	nn	nn	nn	nn	nn	--	--	nn	np
706	LG3	M09363	103.376	nn	np	np	nn	nn	nn	np	nn	np	np	np	nn	nn	np	nn	nn	nn	np	np	nn	np	np	nn	nn	nn	np	np	np	np	nn	nn	np	nn	np	nn	nn	--	nn	nn	nn	nn	nn	--	--	nn	np
708	LG3	M00649	103.876	nn	np	np	nn	nn	nn	np	nn	np	np	np	nn	nn	np	nn	nn	nn	np	--	nn	np	--	nn	nn	nn	np	--	--	np	nn	--	np	nn	np	nn	nn	--	nn	nn	np	nn	nn	np	np	nn	np
707	LG3	M04653	103.882	lm	ll	ll	lm	lm	--	lm	ll	ll	lm	lm	lm	lm	ll	lm	ll	ll	ll	lm	lm	ll	--	ll	lm	ll	ll	lm	ll	lm	ll	lm	ll	ll	--	lm	lm	lm	ll	lm	lm	--	ll	lm	ll	ll	lm
709	LG3	M03250	103.948	lm	ll	ll	lm	lm	--	lm	ll	ll	lm	lm	lm	lm	ll	lm	ll	ll	ll	lm	lm	ll	--	ll	lm	ll	ll	lm	ll	lm	ll	lm	ll	ll	--	lm	lm	lm	ll	lm	lm	--	ll	lm	ll	ll	lm
710	LG3	M64230	104.828	nn	np	nn	np	nn	nn	np	nn	np	np	np	nn	nn	np	nn	nn	nn	--	np	nn	np	--	nn	nn	nn	--	--	np	--	nn	nn	--	nn	np	nn	nn	np	nn	nn	np	nn	nn	np	np	nn	np
711	LG3	M09805	105.486	nn	np	np	nn	nn	nn	np	nn	np	np	np	nn	nn	--	nn	nn	nn	np	np	nn	np	np	nn	--	nn	np	np	nn	np	nn	nn	np	nn	np	nn	nn	np	nn	np	np	nn	nn	np	np	nn	np
712	LG3	M08236	106.061	lm	ll	ll	--	--	lm	lm	ll	ll	--	--	lm	lm	lm	--	ll	ll	ll	ll	--	ll	lm	ll	ll	ll	ll	lm	ll	lm	ll	lm	ll	ll	ll	lm	--	lm	ll	ll	lm	lm	ll	lm	ll	ll	--
713	LG3	M01591	106.541	nn	np	np	nn	nn	nn	np	nn	np	--	--	--	nn	--	nn	nn	nn	np	np	nn	np	np	nn	nn	nn	np	np	nn	np	nn	nn	np	nn	np	nn	np	np	nn	np	np	nn	nn	np	np	nn	np
714	LG3	M00126	107.173	lm	ll	ll	lm	lm	lm	lm	ll	ll	lm	lm	lm	lm	lm	lm	ll	ll	ll	lm	lm	ll	lm	ll	lm	ll	lm	lm	ll	lm	ll	lm	ll	lm	lm	lm	lm	lm	ll	lm	lm	lm	ll	lm	ll	ll	lm
715	LG3	M05188	107.353	nn	np	np	nn	nn	nn	np	nn	np	np	np	nn	nn	np	nn	nn	nn	nn	np	nn	np	np	nn	nn	nn	np	np	nn	np	nn	nn	np	nn	--	nn	np	np	nn	np	np	nn	nn	np	--	nn	np
716	LG3	M05255	107.586	hk	hk	hk	hk	hk	hk	hk	kk	hk	hh	hh	hk	hk	hk	hk	kk	kk	--	h-	--	hk	hk	kk	hk	kk	hk	hh	kk	hh	kk	hk	hk	kk	hk	hk	hk	hk	kk	hh	hh	hk	kk	hh	hk	kk	hk
717	LG3	M03861	108.333	nn	np	np	--	nn	nn	np	nn	np	nn	--	nn	nn	np	nn	nn	nn	--	np	nn	np	np	nn	nn	nn	np	np	nn	np	nn	nn	np	nn	np	nn	np	np	nn	np	np	nn	nn	np	np	nn	np
718	LG3	M53304	108.534	lm	ll	ll	lm	lm	lm	lm	ll	ll	lm	lm	lm	lm	lm	lm	ll	ll	--	lm	lm	ll	lm	ll	lm	ll	lm	lm	ll	lm	ll	lm	ll	lm	lm	lm	lm	lm	ll	lm	lm	lm	ll	lm	ll	ll	lm
719	LG3	M52701	108.898	lm	ll	lm	lm	ll	ll	ll	lm	ll	ll	ll	ll	ll	ll	ll	lm	lm	--	ll	ll	lm	ll	lm	ll	lm	ll	ll	lm	ll	lm	ll	lm	--	ll	ll	ll	--	lm	ll	ll	ll	lm	ll	lm	lm	ll
720	LG3	M06454	109.065	nn	np	np	np	nn	nn	np	--	np	nn	np	nn	nn	--	nn	nn	np	np	np	nn	np	np	nn	nn	nn	np	np	nn	np	nn	nn	np	nn	np	nn	np	np	nn	np	np	nn	nn	--	--	nn	np
721	LG3	cms13399	109.653	nn	np	np	nn	nn	np	np	nn	np	nn	np	nn	nn	np	nn	nn	nn	np	np	nn	np	np	nn	nn	nn	--	--	--	np	nn	nn	np	nn	np	nn	np	--	nn	--	--	nn	nn	np	np	nn	np
722	LG3	M12605	110.511	lm	ll	ll	lm	lm	lm	lm	ll	ll	lm	lm	lm	lm	lm	lm	ll	ll	ll	lm	lm	ll	lm	ll	lm	ll	lm	lm	ll	lm	ll	ll	ll	lm	lm	lm	lm	lm	ll	lm	ll	--	ll	--	ll	ll	lm
723	LG3	M51850	110.655	nn	np	--	nn	nn	nn	np	--	np	--	np	nn	nn	--	nn	nn	--	np	np	nn	np	np	--	nn	nn	np	np	nn	np	nn	nn	np	nn	np	--	np	--	nn	np	np	nn	nn	np	np	nn	np
724	LG3	M12057	110.866	lm	ll	ll	lm	lm	lm	lm	ll	ll	lm	lm	lm	lm	lm	lm	ll	ll	ll	lm	lm	ll	lm	ll	lm	ll	lm	lm	ll	lm	ll	ll	ll	lm	lm	lm	lm	lm	ll	lm	ll	--	ll	--	ll	ll	lm
725	LG3	M07650	111.58	nn	np	np	np	nn	nn	np	nn	np	nn	np	nn	nn	np	nn	nn	nn	np	np	nn	np	np	nn	nn	nn	np	np	nn	np	nn	nn	np	nn	np	nn	np	np	nn	np	np	nn	nn	np	np	nn	np
726	LG3	M00655	112.223	hk	hk	h-	h-	kk	kk	h-	h-	kk	kk	h-	kk	kk	--	kk	h-	h-	--	h-	kk	h-	h-	--	kk	h-	h-	h-	--	h-	h-	kk	h-	kk	h-	kk	h-	--	kk	h-	h-	kk	h-	h-	h-	h-	h-
727	LG3	M04807	112.418	nn	np	np	np	nn	nn	np	nn	np	nn	np	nn	nn	np	nn	nn	nn	np	np	nn	np	np	nn	nn	nn	np	np	nn	np	nn	nn	np	nn	np	nn	np	np	nn	np	np	nn	nn	np	np	nn	np
728	LG3	M09863	112.835	hk	hk	hk	kk	hk	hk	kk	hh	hk	kk	kk	hk	hk	kk	hk	--	hh	hk	kk	hk	hk	kk	hh	hk	hh	kk	kk	hh	kk	hh	hk	hk	h-	kk	hk	kk	kk	hh	kk	kk	hk	hh	--	hk	hh	kk
729	LG3	M03973	113.006	hk	hk	hk	kk	hk	hk	kk	hh	hk	kk	kk	hk	hk	kk	hk	--	hh	hk	kk	hk	hk	kk	hh	hk	hh	kk	kk	hh	kk	hh	hk	hk	h-	kk	hk	kk	kk	hh	kk	kk	hk	hh	--	hk	hh	kk
730	LG3	M04232	113.27	hk	hk	hk	kk	hk	hk	kk	hh	hk	kk	kk	hk	hk	kk	hk	h-	hh	hk	kk	hk	hk	kk	hh	hk	hh	kk	kk	hh	kk	hh	hk	hk	hk	kk	hk	kk	kk	hh	kk	kk	hk	hh	hk	hk	hh	kk
731	LG3	M02055	113.458	hk	hk	hk	kk	hk	hk	kk	hh	hk	kk	kk	hk	hk	kk	hk	h-	hh	hk	kk	hk	hk	kk	hh	hk	hh	kk	kk	hh	kk	hh	hk	hk	h-	kk	hk	kk	kk	hh	kk	kk	hk	hh	hk	hk	hh	kk
732	LG3	M54343	114.172	nn	np	--	nn	nn	nn	--	nn	np	nn	np	nn	nn	np	nn	nn	nn	np	np	nn	np	np	nn	nn	nn	np	np	nn	--	nn	nn	--	nn	np	nn	--	np	nn	--	np	nn	nn	np	np	nn	np
733	LG3	M11555	114.339	lm	ll	lm	ll	lm	lm	ll	lm	lm	ll	ll	lm	lm	ll	lm	lm	lm	lm	ll	lm	lm	ll	lm	lm	lm	lm	ll	lm	ll	lm	ll	lm	lm	ll	lm	lm	ll	lm	ll	ll	lm	lm	--	--	lm	ll
734	LG3	M09248	114.58	hk	hk	hh	kk	kk	kk	hk	hk	kk	kk	hk	kk	kk	hk	kk	hk	hk	hh	hk	kk	hh	hk	hk	kk	hk	hk	hk	hk	hk	hk	kk	hh	kk	hh	kk	hk	hk	kk	hk	hk	k-	kk	hk	hh	hk	hk
735	LG3	M09171	114.726	hk	hk	kk	hh	hh	hh	hk	hk	hh	hh	hk	hh	hh	hk	hh	hk	hk	kk	hk	hh	kk	hk	hk	hh	hk	hk	hk	hk	hk	hk	hh	kk	hh	kk	hh	hk	hk	hh	hk	hk	h-	hh	hk	kk	hk	hk
736	LG3	M06652	115.47	lm	ll	ll	lm	--	lm	lm	ll	ll	lm	lm	lm	lm	ll	lm	ll	ll	ll	lm	lm	ll	lm	ll	lm	ll	lm	lm	ll	lm	ll	lm	ll	--	lm	lm	lm	lm	ll	lm	lm	lm	ll	lm	ll	ll	lm
737	LG3	M62282	115.64	nn	np	np	np	nn	nn	np	nn	np	nn	np	nn	nn	np	nn	nn	nn	--	np	nn	np	np	nn	nn	nn	np	np	nn	np	nn	nn	np	nn	np	nn	np	np	nn	np	np	nn	nn	np	np	nn	np
738	LG3	M03921	116.107	nn	np	--	nn	nn	nn	np	nn	nn	nn	np	nn	nn	np	nn	nn	nn	np	np	nn	np	np	nn	nn	nn	np	--	nn	np	nn	nn	--	nn	np	nn	np	np	nn	np	nn	nn	nn	--	np	nn	np
739	LG3	M12146	116.527	nn	np	nn	np	np	np	np	nn	nn	nn	np	np	np	np	np	nn	nn	nn	np	np	nn	np	nn	np	nn	np	np	nn	np	nn	np	nn	--	--	np	np	np	nn	--	--	np	nn	np	nn	nn	np
740	LG3	M50409	116.95	nn	np	np	nn	nn	nn	np	--	nn	--	np	nn	nn	np	nn	nn	--	--	np	nn	np	np	nn	nn	nn	np	np	nn	np	nn	nn	np	nn	np	nn	np	np	nn	np	np	nn	nn	np	np	nn	np
741	LG3	M68614	117.521	hk	hk	kk	hh	hh	hh	hk	k-	hh	hh	hk	hh	hh	hk	hh	hk	hk	--	hk	hh	kk	hk	hk	hh	hk	hk	hk	hk	hk	hk	hh	kk	hh	kk	hh	hk	hk	hk	hk	k-	hk	hk	hk	kk	hk	hk
742	LG3	M55816	117.979	nn	np	np	nn	nn	nn	np	nn	nn	--	np	nn	nn	np	nn	nn	nn	np	np	nn	np	np	nn	--	nn	np	np	nn	np	nn	nn	np	nn	np	nn	np	np	np	np	np	--	np	np	--	nn	np
743	LG3	M04888	118.019	lm	ll	lm	lm	lm	lm	ll	--	lm	--	ll	lm	lm	ll	lm	lm	lm	lm	ll	lm	lm	ll	lm	lm	lm	ll	ll	lm	ll	lm	lm	lm	lm	ll	lm	ll	ll	lm	ll	ll	lm	lm	ll	lm	lm	ll
744	LG3	M03639	118.553	nn	np	np	nn	nn	nn	np	nn	nn	nn	np	nn	nn	np	nn	nn	nn	np	np	nn	np	np	nn	nn	nn	np	np	nn	np	nn	nn	np	nn	np	nn	np	np	np	np	np	nn	--	np	np	nn	np
745	LG3	M12364	119.219	nn	np	np	nn	nn	nn	np	nn	nn	nn	np	nn	nn	np	nn	nn	nn	np	np	nn	np	np	nn	nn	nn	np	np	nn	np	nn	nn	np	nn	np	nn	np	np	np	np	np	nn	np	np	np	nn	np
746	LG3	M10758	119.801	nn	np	np	nn	nn	nn	np	nn	nn	nn	np	nn	nn	np	nn	nn	nn	--	np	nn	np	np	nn	nn	nn	np	np	nn	np	np	nn	np	nn	np	nn	np	np	np	np	np	nn	np	np	np	nn	np
747	LG3	M05617	119.815	nn	np	np	nn	nn	nn	np	nn	nn	nn	np	nn	nn	np	nn	nn	nn	--	np	nn	np	np	nn	nn	nn	np	np	nn	np	np	nn	np	nn	np	nn	np	np	np	np	np	nn	np	np	np	nn	np
748	LG3	M53654	120.019	hk	hk	hh	hk	kk	kk	hk	hk	kk	--	hk	kk	kk	--	kk	hk	hk	--	hk	kk	hh	hk	hk	kk	hk	hk	hk	hk	hk	hk	kk	hh	kk	hh	h-	hk	hk	hk	hk	hk	hk	hk	hk	hh	hk	hk
749	LG3	M04542	120.404	lm	ll	lm	ll	ll	ll	ll	lm	ll	ll	ll	ll	ll	ll	ll	ll	ll	ll	ll	ll	lm	ll	--	ll	lm	ll	ll	lm	ll	lm	ll	lm	ll	lm	ll	ll	ll	ll	ll	ll	ll	lm	ll	lm	lm	ll
750	LG3	M64227	121.431	nn	np	nn	--	nn	nn	np	nn	np	np	np	nn	nn	np	nn	nn	nn	--	np	nn	np	--	nn	nn	nn	--	--	np	--	nn	nn	--	nn	np	nn	nn	np	nn	nn	np	nn	nn	np	np	nn	np
751	LG3	M08347	123.462	nn	np	--	np	--	--	np	nn	np	np	np	np	--	nn	--	nn	nn	np	np	--	--	np	nn	--	nn	np	np	--	np	nn	--	nn	nn	np	np	np	np	nn	np	np	np	nn	np	nn	nn	np
752	LG3	M63355	123.514	lm	ll	lm	ll	lm	--	ll	lm	ll	lm	ll	lm	lm	ll	lm	lm	lm	lm	ll	lm	lm	ll	lm	lm	lm	ll	ll	lm	ll	lm	ll	lm	--	ll	--	ll	ll	lm	ll	ll	lm	lm	ll	lm	lm	ll
753	LG3	M73299	124.996	nn	np	np	nn	nn	nn	np	nn	nn	nn	nn	nn	nn	--	nn	nn	nn	--	np	nn	np	np	--	nn	nn	np	--	nn	nn	--	--	np	nn	--	nn	np	nn	nn	np	--	--	nn	np	np	nn	--
754	LG3	M50745	125.21	lm	ll	lm	ll	ll	ll	ll	lm	ll	ll	ll	ll	ll	ll	ll	lm	--	--	ll	ll	--	ll	--	ll	lm	ll	ll	lm	ll	lm	ll	lm	ll	lm	lm	ll	ll	ll	ll	ll	--	ll	ll	lm	--	ll
755	LG3	M02019	125.523	nn	np	np	nn	nn	nn	--	nn	nn	nn	--	nn	nn	--	nn	nn	nn	np	np	nn	nn	nn	nn	nn	nn	np	np	nn	np	nn	nn	np	nn	np	nn	np	np	nn	np	np	nn	nn	nn	np	nn	--
756	LG3	M01764	127.256	nn	np	np	nn	nn	nn	nn	nn	nn	--	np	nn	nn	np	nn	nn	nn	--	np	nn	np	np	nn	nn	nn	nn	np	nn	nn	nn	nn	--	nn	--	nn	np	np	--	np	--	nn	--	--	np	nn	np
757	LG3	M04015	129.79	nn	np	nn	np	np	np	nn	np	nn	np	nn	np	np	nn	np	np	np	np	nn	np	np	nn	np	np	np	nn	nn	np	nn	np	--	np	np	nn	np	nn	nn	np	nn	nn	--	np	nn	np	np	nn
758	LG3	M08939	130.042	nn	np	nn	np	np	np	nn	np	nn	np	nn	np	np	nn	np	np	np	np	nn	np	np	nn	np	np	np	nn	nn	np	nn	np	--	np	np	nn	np	nn	nn	np	nn	nn	--	np	nn	np	np	nn
759	LG3	M02914	130.453	lm	ll	lm	ll	ll	ll	ll	lm	ll	ll	ll	ll	ll	ll	ll	lm	lm	--	ll	ll	lm	ll	lm	ll	lm	ll	ll	lm	ll	lm	ll	lm	ll	lm	lm	ll	ll	ll	ll	ll	lm	ll	ll	lm	lm	ll
760	LG3	M53685	131.576	nn	np	--	nn	nn	nn	nn	nn	nn	nn	np	nn	nn	np	nn	nn	nn	np	nn	nn	nn	np	nn	nn	nn	np	--	nn	--	nn	nn	--	nn	--	nn	nn	nn	--	--	--	nn	--	np	np	nn	--
761	LG3	M53684	131.69	nn	np	--	nn	nn	nn	nn	nn	nn	nn	--	nn	nn	np	nn	nn	nn	np	nn	nn	nn	np	nn	nn	nn	np	--	nn	--	nn	nn	--	nn	--	nn	nn	nn	--	--	--	nn	--	np	np	nn	--
762	LG3	M08649	132.75	lm	ll	ll	ll	ll	ll	ll	lm	ll	ll	ll	ll	ll	ll	ll	lm	lm	--	ll	ll	--	ll	lm	ll	lm	ll	ll	lm	ll	--	ll	lm	ll	lm	lm	ll	ll	ll	ll	--	lm	ll	ll	lm	lm	ll
763	LG3	M07905	136.759	nn	np	np	np	np	nn	np	nn	nn	--	np	np	--	np	--	nn	nn	np	np	np	np	--	nn	np	nn	np	np	nn	np	nn	nn	--	nn	np	np	np	np	nn	np	np	np	nn	np	nn	nn	np
764	LG4	M12689	0	lm	ll	lm	lm	lm	ll	lm	ll	ll	--	--	lm	lm	ll	ll	ll	lm	lm	ll	lm	ll	lm	lm	lm	ll	ll	ll	ll	--	lm	lm	lm	lm	--	ll	lm	lm	ll	ll	ll	lm	ll	ll	--	ll	ll
765	LG4	M05849	2.234	lm	ll	lm	lm	lm	lm	lm	lm	lm	ll	lm	ll	ll	lm	lm	lm	lm	--	lm	ll	--	ll	ll	lm	lm	lm	lm	lm	ll	--	--	ll	lm	lm	lm	ll	--	ll	ll	--	ll	lm	lm	ll	lm	lm
766	LG4	M03238	2.978	hk	hk	hh	kk	hh	kk	hk	kk	kk	hk	hk	hh	hk	k-	kk	kk	hk	--	kk	hh	kk	hk	hk	hk	kk	kk	kk	kk	hk	--	hk	hh	hk	hk	k-	hh	kk	kk	hk	kk	hk	kk	--	hk	kk	kk
767	LG4	M03014	3.453	lm	ll	ll	lm	lm	lm	ll	lm	lm	ll	lm	ll	ll	--	lm	lm	lm	ll	lm	ll	lm	ll	lm	ll	lm	lm	lm	lm	lm	lm	ll	ll	lm	lm	lm	ll	--	lm	lm	lm	lm	lm	lm	ll	lm	lm
768	LG4	M04307	6.111	hk	hk	kk	hk	kk	hk	hk	hh	hk	hk	hk	kk	kk	hk	hk	hk	hk	kk	hh	kk	hh	kk	hk	kk	hk	hh	hk	hh	hk	kk	kk	kk	hk	hk	hk	kk	hh	hk	hk	hk	hk	hh	hk	hk	hk	hh
769	LG4	M02892	7.07	lm	ll	ll	lm	ll	lm	lm	lm	lm	lm	lm	ll	ll	lm	lm	lm	--	ll	lm	ll	lm	ll	lm	ll	lm	lm	lm	lm	lm	lm	ll	ll	lm	lm	lm	ll	lm	lm	lm	lm	lm	lm	lm	lm	lm	lm
770	LG4	M01018	7.096	lm	ll	ll	lm	ll	lm	lm	lm	lm	lm	lm	ll	ll	lm	lm	lm	lm	ll	lm	ll	lm	ll	lm	ll	lm	lm	lm	lm	lm	lm	ll	ll	lm	lm	lm	ll	lm	lm	lm	lm	lm	lm	lm	lm	lm	lm
771	LG4	M08484	7.164	nn	np	nn	np	nn	np	np	np	np	np	np	nn	nn	--	np	nn	np	nn	np	nn	np	nn	np	nn	nn	np	np	np	np	nn	--	nn	np	np	np	nn	np	np	np	--	np	--	--	--	np	np
772	LG4	M10472	7.761	lm	ll	ll	lm	ll	lm	lm	lm	lm	lm	lm	ll	ll	lm	lm	lm	lm	--	lm	ll	lm	ll	lm	ll	lm	lm	lm	lm	lm	lm	ll	ll	lm	lm	lm	ll	lm	lm	lm	lm	lm	lm	lm	lm	lm	lm
773	LG4	M03671	7.77	lm	ll	ll	--	ll	lm	lm	lm	lm	lm	lm	ll	ll	lm	lm	lm	lm	ll	lm	ll	lm	ll	lm	ll	lm	lm	lm	lm	lm	lm	ll	ll	lm	lm	lm	ll	lm	lm	lm	lm	lm	lm	lm	lm	lm	lm
774	LG4	M03087	8.186	lm	ll	lm	lm	lm	ll	lm	ll	ll	ll	--	lm	lm	lm	ll	ll	--	lm	ll	lm	ll	lm	--	lm	ll	ll	ll	ll	lm	lm	lm	lm	--	lm	ll	lm	lm	ll	--	ll	--	ll	--	lm	ll	ll
775	LG4	M03779	9.384	lm	ll	ll	lm	lm	--	lm	lm	lm	ll	lm	ll	ll	lm	lm	lm	lm	--	lm	ll	lm	ll	--	ll	lm	lm	lm	lm	ll	ll	ll	ll	ll	lm	lm	ll	lm	lm	lm	lm	lm	lm	lm	ll	lm	lm
776	LG4	M07400	10.063	nn	np	nn	np	np	np	--	np	--	np	nn	nn	nn	--	np	np	--	nn	np	nn	np	nn	--	nn	--	np	np	np	nn	np	nn	nn	np	--	np	nn	np	np	nn	nn	np	np	--	nn	np	np
777	LG4	M05053	11.163	lm	ll	lm	ll	ll	ll	lm	ll	lm	lm	lm	lm	lm	lm	ll	ll	lm	lm	ll	--	ll	lm	--	lm	lm	ll	ll	ll	lm	lm	lm	lm	lm	lm	ll	lm	lm	ll	lm	lm	lm	ll	lm	lm	lm	ll
778	LG4	M00381	11.713	lm	ll	lm	ll	ll	ll	lm	ll	lm	lm	lm	lm	lm	lm	ll	ll	lm	lm	ll	lm	ll	lm	lm	lm	lm	ll	ll	ll	lm	lm	lm	lm	lm	lm	ll	lm	lm	ll	lm	lm	lm	ll	lm	lm	lm	ll
779	LG4	M06396	12.042	lm	ll	lm	ll	ll	ll	lm	ll	lm	lm	lm	lm	lm	lm	ll	ll	lm	lm	ll	lm	ll	lm	lm	lm	lm	ll	ll	ll	lm	lm	lm	lm	lm	lm	ll	lm	lm	ll	lm	lm	lm	ll	lm	lm	lm	ll
780	LG4	M03822	14.53	lm	ll	lm	ll	ll	ll	ll	ll	lm	--	lm	lm	lm	lm	ll	ll	lm	lm	ll	lm	--	lm	lm	lm	lm	ll	ll	ll	lm	lm	lm	lm	lm	lm	ll	--	ll	ll	lm	lm	lm	lm	lm	lm	lm	ll
781	LG4	M11547	15.544	hk	hk	hk	kk	kk	kk	hk	kk	hk	hk	hk	hh	hh	hk	kk	kk	hk	hh	kk	hh	hk	hh	hk	hk	hk	kk	kk	kk	hh	hk	hh	hh	hk	hk	kk	hh	--	kk	hk	hk	hk	kk	k-	hh	hk	kk
782	LG4	M02792	15.82	hk	hk	hk	kk	kk	kk	hk	kk	hk	hk	hk	hh	hh	hk	kk	kk	hk	hh	kk	hh	hk	hh	hk	hk	hk	kk	kk	kk	hh	hk	hh	hh	hk	hk	kk	hh	--	kk	hk	hk	hk	kk	k-	hh	hk	kk
783	LG4	M09036	17.809	lm	ll	lm	ll	ll	ll	ll	ll	lm	lm	--	lm	lm	lm	ll	--	lm	lm	ll	lm	lm	--	lm	--	lm	ll	ll	ll	lm	ll	lm	lm	lm	lm	ll	lm	ll	ll	lm	lm	lm	lm	--	lm	ll	ll
784	LG4	M03075	18.003	lm	ll	lm	ll	ll	ll	ll	ll	lm	lm	--	lm	lm	lm	ll	--	lm	lm	ll	lm	lm	lm	lm	--	lm	ll	ll	ll	lm	ll	lm	lm	lm	lm	ll	lm	ll	ll	lm	lm	lm	lm	--	lm	ll	ll
785	LG4	M03005	19.184	hk	hk	hk	hk	kk	kk	kk	hk	hk	--	hk	hh	hh	hk	kk	k-	hk	hh	kk	hh	hk	hh	hk	hk	hk	kk	kk	kk	hh	hk	hh	hh	hk	hk	kk	hh	hk	kk	hk	hk	hk	kk	hk	hh	hk	kk
786	LG4	M01069	19.77	lm	ll	lm	ll	ll	ll	ll	ll	lm	lm	lm	lm	lm	--	ll	ll	lm	lm	ll	lm	lm	lm	lm	lm	lm	ll	ll	ll	lm	lm	lm	lm	ll	lm	ll	lm	ll	ll	lm	--	lm	lm	lm	lm	lm	ll
787	LG4	M03866	21.475	hk	hk	hk	kk	kk	kk	kk	kk	hk	hk	h-	hh	hh	hk	kk	k-	hk	hh	kk	h-	hk	hh	h-	hk	hk	kk	kk	kk	hh	hk	hh	hh	hk	hk	kk	hk	kk	kk	hk	hk	hk	hk	hk	hh	hk	kk
788	LG4	M61821	22.092	hk	hk	hk	hk	hh	hh	hh	hh	hk	hk	hk	kk	kk	k-	hh	hh	hk	kk	hh	hk	hk	kk	hk	hk	hk	hh	hh	hh	kk	hk	kk	kk	hk	hk	hh	hk	hh	hh	hk	kk	hk	hk	hk	kk	hk	hh
789	LG4	M03067	22.179	hk	hk	hk	hk	hh	hh	hh	hh	hk	--	hk	kk	hk	hk	hh	hh	hk	hk	hh	hk	hk	hk	hk	hk	hk	hh	hh	hh	hk	hk	hk	hk	hk	hk	hh	hk	hh	hh	hk	hk	hk	hk	hk	kk	hk	hh
790	LG4	M01799	22.247	lm	ll	lm	lm	lm	lm	lm	lm	--	--	lm	ll	ll	lm	lm	lm	lm	ll	lm	lm	lm	ll	lm	lm	--	lm	lm	lm	ll	ll	ll	ll	--	lm	lm	lm	lm	lm	lm	--	lm	lm	ll	ll	--	lm
791	LG4	M01722	22.786	hk	hk	hk	hk	hk	hk	hk	kk	hk	--	hk	hh	hh	hk	hk	hk	h-	hh	kk	hk	hk	hh	hk	hk	hk	kk	hk	kk	hh	hk	hh	hh	hk	hk	hk	hk	hk	kk	hk	h-	hk	hk	hk	hh	hk	k-
792	LG4	M53266	23.145	hk	hk	hk	hk	hk	hk	hk	kk	hk	hk	hk	hh	hh	hk	hk	hk	hh	hh	kk	hk	hk	hh	hk	hk	hk	kk	hk	kk	hh	kk	hh	hh	hk	hk	hk	hk	hk	kk	hk	hk	hk	k-	hk	hh	h-	hk
793	LG4	M07099	23.751	hk	hk	hk	hk	kk	kk	kk	kk	hk	hk	hk	hh	hh	kk	kk	kk	hk	hh	kk	hk	hk	hh	hk	hk	hk	kk	k-	hk	hh	hk	hh	hh	hk	hk	kk	hk	kk	kk	hk	hk	hk	hk	hk	hh	hk	kk
794	LG4	M08407	24.094	lm	ll	ll	lm	ll	ll	ll	--	lm	lm	lm	lm	lm	ll	ll	ll	ll	lm	ll	lm	lm	lm	ll	lm	lm	ll	lm	lm	--	lm	lm	lm	ll	lm	ll	lm	--	ll	ll	--	ll	lm	lm	lm	lm	ll
795	LG4	M62251	24.42	lm	ll	lm	ll	ll	ll	ll	ll	lm	lm	lm	lm	lm	ll	ll	ll	lm	lm	ll	lm	lm	lm	lm	lm	lm	ll	ll	lm	lm	--	lm	lm	--	lm	ll	--	--	ll	lm	--	lm	lm	lm	lm	lm	ll
796	LG4	M62248	24.483	lm	ll	lm	ll	ll	ll	ll	ll	lm	lm	lm	lm	lm	ll	ll	ll	lm	lm	ll	lm	lm	lm	lm	lm	lm	ll	ll	lm	lm	--	lm	lm	--	lm	ll	--	--	ll	lm	--	lm	lm	lm	lm	lm	ll
797	LG4	M72195	24.749	hk	hk	hk	kk	kk	kk	kk	kk	hk	hk	hk	hh	hh	kk	kk	kk	hk	h-	kk	hk	hk	hh	hk	hk	hk	kk	kk	hk	hh	hk	hh	hh	hk	hk	kk	hk	kk	kk	hk	hk	hk	hk	hk	hh	hk	kk
798	LG4	M55041	24.931	hk	hk	hk	kk	kk	kk	kk	kk	hk	hk	hk	hk	hh	kk	kk	kk	hk	--	kk	hk	hk	hh	hk	hk	hk	kk	kk	hk	hh	--	hh	hh	hk	hk	kk	k-	kk	kk	hk	hk	hk	hk	hk	hh	hk	kk
799	LG4	M69346	25.688	hk	hk	hh	hk	kk	kk	kk	kk	hk	--	hk	hh	hh	--	kk	kk	hk	hh	kk	hk	hk	hh	hk	hk	hk	kk	kk	hk	h-	--	--	hh	k-	hk	kk	hk	--	kk	hk	hk	hk	hk	hk	hh	h-	kk
800	LG4	M69345	26.093	hk	hk	kk	hh	hh	hh	hh	hh	hk	--	hk	kk	kk	--	hh	hh	hk	kk	hh	hk	hk	kk	hk	hk	hk	hh	hh	hk	k-	--	--	kk	h-	hk	hh	hk	--	hh	hk	hk	hk	hk	hk	kk	k-	hh
801	LG4	M01692	26.673	hk	hk	k-	hh	hh	hh	hh	hh	hk	h-	hk	kk	kk	hh	hh	hh	hk	kk	hh	hk	hk	kk	hk	hk	hk	hh	hh	hk	kk	hk	--	kk	hk	k-	hh	hk	hh	hh	hk	hk	hk	hk	hk	kk	hk	hh
802	LG4	M05903	27.002	hk	hk	k-	hh	hh	hh	hh	hh	hk	h-	hk	kk	kk	hh	hh	hh	hk	kk	hh	hk	hk	kk	hk	hk	hk	hh	hh	hk	kk	hk	--	kk	hk	k-	hh	hk	hh	hh	hk	hk	hk	hk	hk	kk	hk	hh
803	LG4	M05034	27.18	hk	hk	hk	hh	hh	hh	hh	hh	hk	h-	hk	kk	kk	hh	hh	hh	hk	kk	hh	hk	hk	kk	hk	hk	hk	hh	hh	hk	kk	hk	--	kk	hk	k-	hh	hk	hh	hh	hk	hk	hk	hk	hk	kk	hk	hh
804	LG4	M06461	27.191	hk	hk	k-	hh	hh	hh	hh	hh	hk	h-	hk	kk	kk	hh	hh	hh	hk	kk	hh	hk	hk	kk	hk	hk	hk	hh	hh	hk	kk	hk	--	kk	hk	hk	hh	hk	hh	hh	hk	hk	hk	hk	hk	kk	hk	hh
805	LG4	cms13289	29.265	hk	hk	hh	hk	hh	--	hh	hh	hk	hk	hk	kk	kk	hh	hh	hh	hk	kk	hh	hk	hk	kk	hk	hk	hk	hh	hh	hk	kk	hk	kk	kk	hk	hk	hh	hk	hh	hh	hk	kk	hk	hk	hk	kk	hk	hh
806	LG4	M10336	29.683	lm	ll	lm	lm	lm	lm	lm	lm	lm	lm	lm	ll	ll	--	lm	lm	ll	ll	lm	lm	lm	ll	--	lm	lm	lm	lm	lm	ll	ll	ll	--	lm	lm	lm	ll	lm	lm	lm	--	--	lm	--	ll	ll	lm
807	LG4	M67787	30.249	hk	hk	hk	hh	hh	hh	hh	hh	hh	kk	hk	kk	kk	hh	hh	hh	hk	--	hh	hk	hk	kk	h-	hk	hk	hh	hk	hk	kk	hk	--	kk	hk	hk	hh	hk	hh	hh	hk	kk	hk	hk	hk	kk	hk	hh
808	LG4	M68490	31.188	hk	hk	k-	kk	kk	kk	kk	kk	kk	hk	hk	h-	hh	kk	kk	kk	hk	hh	kk	hk	hk	hh	hk	hk	hk	kk	hk	hk	hh	hk	hh	hh	hk	hk	kk	hk	--	kk	hk	hk	hk	hk	hk	h-	hk	kk
809	LG4	M68115	32.081	hk	hk	hk	kk	kk	kk	hk	kk	kk	hk	h-	hh	hh	kk	kk	kk	hk	--	kk	hk	hk	hh	kk	hk	hk	kk	hk	hk	hk	hk	hh	hh	--	hk	kk	hk	kk	kk	hk	hk	hk	hk	hk	hh	hk	kk
810	LG4	M68113	32.665	hk	hk	hk	kk	kk	kk	hk	kk	kk	hk	h-	hh	hh	kk	kk	kk	hk	--	kk	hk	hk	hh	kk	hk	hk	kk	h-	hk	hk	hk	hh	hh	--	hk	kk	hk	kk	kk	hk	hk	hk	hk	hk	hh	hk	kk
811	LG4	M11485	33.007	lm	ll	lm	lm	lm	lm	lm	lm	lm	--	lm	ll	ll	lm	lm	lm	lm	lm	lm	lm	ll	ll	lm	lm	lm	lm	lm	lm	lm	lm	ll	ll	--	lm	lm	lm	lm	lm	lm	lm	lm	lm	lm	ll	lm	lm
812	LG4	M56037	33.513	hk	hk	hk	kk	kk	kk	hk	kk	kk	hk	hk	hh	hh	--	kk	kk	hk	--	kk	hk	hk	hh	kk	hk	hk	kk	hk	hk	hk	hk	hh	hh	hk	hk	kk	hk	kk	kk	hk	hk	hk	hk	hk	hh	hk	kk
813	LG4	M08702	36.437	lm	ll	lm	lm	lm	lm	ll	lm	lm	ll	ll	ll	ll	lm	lm	lm	ll	ll	lm	ll	lm	ll	lm	lm	lm	lm	lm	ll	lm	ll	ll	ll	lm	ll	lm	ll	lm	lm	ll	lm	ll	lm	lm	ll	lm	lm
814	LG4	M73144	36.636	lm	ll	lm	lm	lm	--	ll	lm	lm	ll	ll	ll	ll	--	lm	lm	ll	--	lm	ll	lm	ll	lm	lm	lm	lm	lm	ll	--	--	ll	ll	lm	ll	lm	ll	lm	lm	ll	--	ll	lm	ll	ll	lm	lm
815	LG4	M71945	37.456	lm	ll	lm	lm	lm	lm	ll	ll	lm	ll	ll	--	ll	ll	lm	lm	--	--	lm	ll	--	ll	lm	lm	lm	--	lm	ll	lm	ll	ll	ll	lm	ll	lm	ll	ll	lm	ll	--	ll	lm	ll	ll	lm	lm
816	LG4	M62144	38.611	lm	ll	lm	lm	lm	--	ll	lm	lm	ll	ll	ll	ll	--	lm	lm	ll	--	lm	ll	lm	ll	lm	lm	lm	lm	lm	ll	--	--	ll	ll	lm	ll	lm	ll	lm	lm	ll	--	ll	lm	ll	ll	lm	lm
817	LG4	M10931	40.418	lm	ll	lm	--	lm	lm	ll	lm	lm	ll	ll	ll	ll	lm	lm	lm	ll	--	lm	ll	lm	lm	lm	lm	lm	ll	lm	ll	lm	ll	ll	ll	lm	ll	ll	ll	--	lm	ll	lm	ll	lm	ll	ll	lm	lm
818	LG4	M62501	42.216	lm	ll	lm	lm	lm	--	ll	ll	lm	ll	ll	ll	ll	lm	lm	lm	ll	lm	lm	ll	lm	lm	--	lm	lm	ll	lm	ll	lm	ll	ll	ll	ll	ll	ll	ll	lm	lm	ll	ll	ll	--	ll	ll	--	lm
819	LG4	M11493	42.288	hk	hk	hk	hk	hk	hh	hk	kk	kk	h-	hk	hk	hk	kk	hk	hk	hk	kk	kk	--	hh	hh	--	h-	hh	hk	hh	hk	hh	hk	--	hk	hk	kk	hk	--	hk	hh	hh	--	hk	hh	kk	hk	hh	hk
820	LG4	M03465	42.334	hk	hk	hk	hk	hk	hh	hk	kk	kk	h-	hk	hk	hk	kk	hk	hk	hk	kk	kk	k-	hh	hh	--	h-	hh	hk	hh	hk	hh	hk	--	hk	hk	kk	hk	k-	hk	hh	hh	--	hk	hh	kk	hk	hh	hk
821	LG4	M54353	43.397	lm	ll	--	lm	lm	lm	lm	lm	lm	lm	lm	lm	lm	lm	lm	lm	lm	--	lm	lm	ll	ll	lm	ll	ll	lm	ll	lm	ll	lm	lm	lm	lm	lm	lm	lm	lm	lm	lm	ll	lm	ll	lm	lm	ll	lm
822	LG4	M54352	43.612	lm	ll	--	lm	lm	lm	lm	lm	lm	lm	lm	lm	lm	lm	lm	lm	lm	--	lm	lm	ll	ll	lm	ll	ll	lm	ll	lm	ll	--	lm	lm	lm	lm	lm	lm	lm	lm	lm	ll	lm	ll	lm	lm	ll	lm
823	LG4	M54354	43.735	lm	ll	--	ll	lm	lm	lm	lm	lm	lm	lm	lm	lm	lm	lm	lm	lm	--	lm	lm	ll	ll	lm	ll	ll	lm	ll	lm	ll	lm	lm	lm	lm	lm	lm	lm	lm	lm	lm	ll	lm	ll	lm	lm	ll	lm
824	LG4	M11413	44.451	lm	ll	lm	lm	lm	ll	ll	ll	lm	ll	ll	ll	ll	--	lm	lm	ll	ll	lm	ll	lm	lm	lm	lm	lm	ll	lm	ll	lm	ll	ll	ll	ll	ll	ll	ll	ll	--	ll	--	ll	lm	ll	ll	lm	lm
825	LG4	M62790	45.242	lm	ll	lm	ll	--	ll	lm	lm	lm	lm	lm	lm	lm	lm	lm	--	lm	lm	lm	lm	lm	--	ll	ll	ll	lm	--	lm	ll	lm	ll	lm	ll	lm	lm	--	--	lm	ll	--	lm	ll	lm	lm	ll	ll
826	LG4	M56707	45.657	lm	ll	lm	lm	ll	ll	lm	--	lm	--	lm	lm	lm	--	lm	--	--	--	lm	lm	--	ll	lm	ll	ll	lm	--	lm	ll	--	--	lm	--	lm	lm	lm	lm	lm	ll	--	lm	ll	lm	--	ll	lm
827	LG4	M56714	46.179	lm	ll	lm	lm	ll	ll	lm	--	lm	--	lm	lm	lm	--	lm	--	--	--	lm	lm	--	ll	lm	ll	ll	lm	--	lm	ll	--	--	lm	--	lm	lm	lm	lm	lm	--	--	lm	ll	lm	--	ll	lm
828	LG4	M56710	46.186	lm	ll	lm	lm	ll	ll	lm	--	lm	--	lm	lm	lm	--	lm	--	--	--	lm	lm	--	ll	lm	ll	ll	lm	--	lm	ll	--	--	lm	--	lm	lm	lm	lm	lm	ll	--	lm	ll	lm	--	ll	lm
829	LG4	M09040	46.734	lm	ll	lm	lm	ll	lm	lm	lm	lm	lm	lm	lm	lm	--	lm	lm	lm	lm	lm	lm	ll	ll	lm	ll	ll	lm	ll	lm	ll	lm	lm	lm	lm	lm	lm	lm	lm	lm	ll	ll	lm	ll	lm	lm	ll	lm
830	LG4	M09921	47.52	lm	ll	--	ll	lm	--	lm	lm	lm	lm	lm	--	lm	lm	--	lm	--	lm	--	lm	ll	ll	lm	ll	ll	lm	ll	lm	ll	--	lm	lm	lm	lm	lm	lm	lm	lm	lm	ll	lm	ll	lm	lm	ll	ll
831	LG4	M08198	47.839	hk	hk	hk	kk	hk	hk	hh	--	hk	--	hh	hk	hk	hh	hk	hk	--	--	hk	hh	kk	kk	hk	kk	kk	hh	kk	hh	kk	kk	hk	hk	hk	hh	hh	hh	hk	hk	hk	kk	hh	kk	hk	hk	kk	hk
832	LG4	M05314	48.046	lm	ll	ll	ll	--	lm	lm	lm	lm	lm	lm	ll	lm	--	lm	lm	lm	--	lm	lm	ll	--	lm	--	ll	lm	ll	lm	ll	lm	ll	lm	lm	lm	lm	lm	lm	lm	lm	ll	lm	ll	lm	lm	ll	lm
833	LG4	M54678	49.756	hk	hk	hk	kk	hk	hk	hh	hh	hk	hh	hh	hk	hk	hh	hk	hk	hh	hk	hk	hh	kk	kk	hk	kk	kk	hh	kk	hh	kk	hk	hk	hk	hk	k-	hh	hh	hk	hk	hk	kk	hh	kk	hk	hh	kk	hk
834	LG4	M54677	49.906	hk	hk	hk	kk	hk	hk	hh	hh	hk	hh	hh	hk	hk	hh	hk	hk	hh	hk	hk	hh	kk	kk	hk	kk	kk	hh	kk	hh	kk	hk	hk	hk	hk	k-	hh	hh	hk	hk	hk	kk	hh	kk	hk	hh	kk	hk
835	LG4	M12140	50.238	lm	ll	lm	lm	lm	lm	ll	ll	lm	ll	ll	lm	lm	ll	lm	lm	ll	lm	lm	ll	lm	lm	lm	lm	lm	ll	lm	ll	lm	lm	lm	ll	lm	lm	ll	ll	lm	lm	lm	lm	ll	lm	lm	ll	lm	--
836	LG4	M04061	50.774	lm	ll	--	ll	lm	lm	lm	lm	lm	lm	lm	lm	lm	lm	lm	ll	lm	--	lm	lm	ll	ll	lm	ll	ll	lm	ll	lm	ll	lm	lm	lm	--	lm	lm	lm	lm	lm	ll	ll	lm	ll	ll	lm	ll	lm
837	LG4	M12658	50.825	lm	ll	--	ll	lm	lm	lm	lm	lm	lm	lm	lm	lm	lm	lm	ll	lm	--	lm	lm	ll	ll	lm	ll	ll	lm	ll	lm	ll	lm	lm	lm	--	lm	lm	lm	lm	lm	ll	ll	lm	ll	ll	lm	ll	lm
838	LG4	M68149	51.182	hk	hk	hk	hh	hk	hk	kk	kk	hk	--	kk	hk	hk	kk	hk	hk	kk	hk	hk	kk	hh	hh	hk	hh	hh	kk	hh	kk	hh	hk	hk	hk	hk	hk	kk	kk	hk	hk	hh	hh	kk	hh	hh	kk	hh	hk
839	LG4	M06965	51.34	lm	ll	lm	ll	lm	lm	lm	lm	lm	lm	lm	--	lm	lm	lm	lm	lm	ll	lm	lm	ll	ll	lm	ll	ll	lm	ll	lm	ll	lm	lm	lm	lm	lm	lm	lm	lm	lm	ll	ll	--	ll	--	lm	ll	lm
840	LG4	M02026	51.455	lm	ll	lm	ll	lm	--	lm	lm	lm	lm	lm	--	lm	lm	lm	lm	lm	ll	lm	lm	ll	ll	lm	ll	ll	lm	ll	lm	ll	lm	lm	lm	lm	lm	lm	lm	lm	lm	ll	ll	--	ll	--	lm	ll	lm
841	LG4	M12002	51.467	lm	ll	lm	lm	lm	--	ll	ll	lm	--	ll	lm	lm	ll	lm	lm	ll	--	lm	ll	lm	lm	lm	lm	lm	ll	lm	ll	lm	ll	lm	--	lm	--	ll	ll	lm	lm	lm	lm	ll	lm	lm	ll	lm	lm
842	LG4	M05859	51.471	lm	ll	lm	lm	lm	--	ll	ll	lm	--	ll	lm	lm	ll	lm	lm	ll	--	lm	ll	lm	lm	lm	lm	lm	ll	lm	ll	lm	ll	lm	--	lm	--	ll	ll	lm	lm	lm	lm	ll	lm	lm	ll	lm	lm
843	LG4	M01688	51.494	lm	ll	lm	lm	lm	--	ll	ll	lm	--	ll	--	lm	ll	lm	lm	ll	--	lm	ll	lm	lm	lm	lm	lm	ll	lm	ll	lm	ll	lm	--	lm	--	ll	ll	lm	lm	lm	lm	ll	lm	lm	ll	lm	lm
844	LG4	M04766	51.552	lm	ll	lm	lm	lm	--	ll	ll	lm	--	ll	lm	lm	ll	lm	lm	ll	--	lm	ll	lm	lm	lm	lm	lm	ll	lm	ll	lm	ll	lm	--	lm	--	ll	ll	lm	lm	lm	lm	ll	lm	lm	ll	lm	lm
845	LG4	M62391	51.576	hk	hk	hk	hh	hk	hk	kk	kk	hk	kk	kk	hk	hk	kk	hk	hk	--	--	hk	kk	hh	hh	hk	hh	hh	kk	hh	kk	hh	hk	hk	hk	hk	hk	kk	kk	hk	hk	hh	hh	kk	hh	kk	kk	hh	hk
846	LG4	M67824	52.168	hk	hk	hk	hk	hk	hk	hh	hh	hk	--	hh	hk	hk	hh	hk	hk	hh	--	hk	hh	kk	kk	hk	kk	kk	hh	kk	hh	kk	hk	hk	hk	--	hk	hh	hh	hk	hk	kk	kk	hh	kk	hk	hh	kk	hk
847	LG4	M05804	52.709	hk	hk	hk	kk	hk	hk	hh	hh	hk	hh	hh	hk	hk	hh	hk	hk	hh	hh	hk	hh	kk	kk	hk	kk	kk	hh	kk	hh	kk	hk	hk	hk	hk	hk	hh	hh	hk	hk	kk	kk	hh	k-	hk	hh	kk	hk
848	LG4	M08790	53.038	hk	hk	hk	hh	hk	hk	kk	kk	hk	kk	kk	hk	hk	kk	hk	hk	kk	kk	hk	kk	hh	hh	hk	hh	hh	kk	hh	kk	hh	hk	hk	hk	hk	hk	kk	kk	hk	hk	hh	hh	k-	hh	h-	kk	hh	hk
849	LG4	M04148	53.176	hk	hk	hk	hh	hk	hk	kk	kk	hk	kk	kk	hk	hk	kk	hk	hk	kk	kk	hk	kk	hh	hh	hk	hh	hh	kk	hh	kk	hh	hk	hk	hk	hk	hk	kk	kk	hk	hk	hh	hh	--	hh	--	kk	hh	hk
850	LG4	M54994	53.455	lm	ll	lm	lm	lm	lm	ll	ll	lm	--	--	lm	lm	--	lm	lm	ll	lm	lm	ll	lm	lm	lm	lm	lm	ll	lm	ll	lm	--	lm	lm	lm	lm	ll	ll	lm	lm	lm	lm	ll	lm	lm	ll	lm	lm
851	LG4	M54992	53.496	lm	ll	lm	lm	lm	lm	ll	ll	lm	--	--	lm	lm	--	lm	lm	ll	lm	lm	ll	lm	lm	lm	lm	lm	ll	lm	ll	lm	--	lm	lm	lm	lm	ll	ll	lm	lm	lm	lm	ll	lm	lm	ll	lm	lm
852	LG4	M04417	53.605	nn	np	--	np	np	np	--	--	np	--	nn	--	np	--	--	np	--	--	nn	nn	np	np	np	--	np	nn	np	nn	np	nn	np	np	np	nn	nn	nn	nn	np	np	nn	--	np	np	nn	np	nn
853	LG4	M01477	53.888	lm	ll	--	lm	lm	ll	ll	ll	lm	--	ll	lm	--	--	--	lm	ll	lm	lm	ll	lm	lm	ll	--	lm	--	lm	ll	lm	--	--	lm	--	lm	ll	ll	--	lm	--	lm	ll	lm	lm	ll	lm	lm
854	LG4	M07578	53.931	lm	ll	--	lm	lm	ll	ll	--	lm	--	ll	lm	--	--	--	lm	ll	lm	lm	ll	lm	lm	ll	--	lm	--	lm	ll	lm	--	--	lm	--	lm	ll	ll	--	lm	--	lm	ll	lm	lm	ll	lm	lm
855	LG4	M04819	53.981	hk	hk	hk	hk	hk	hk	hh	hh	hk	hh	hh	hk	hk	hh	hk	kk	hh	--	hk	hh	kk	kk	hk	kk	kk	hh	kk	hh	kk	hk	--	hk	hk	hk	hh	h-	hk	hk	kk	kk	--	kk	hk	hh	kk	hk
856	LG4	M05450	54.229	hk	hk	hk	hk	hk	hk	kk	kk	hk	kk	kk	hk	hk	kk	hk	hh	kk	--	hk	kk	hh	hh	hk	hh	hh	kk	hh	kk	hh	hk	hh	hk	hk	hk	kk	kk	hk	hk	hh	hh	kk	hh	hk	kk	hh	hk
857	LG4	M06877	54.239	hk	hk	hk	hk	hk	hk	hh	hh	hk	hh	hh	hk	hk	hh	hk	kk	hh	--	hk	hh	kk	kk	hk	kk	kk	hh	kk	hh	kk	hk	kk	hk	hk	hk	hh	hh	hk	hk	kk	kk	hh	kk	hk	hh	kk	hk
858	LG4	M70112	54.724	hk	hk	hk	hk	hk	hk	hh	hh	hk	hh	hh	hk	hk	hh	hk	kk	hh	--	hk	hh	kk	k-	hk	kk	kk	hh	kk	hh	kk	hk	hk	hk	hk	hk	hh	hh	--	hk	kk	kk	hh	kk	hk	hh	kk	hk
859	LG4	M03801	55.047	lm	ll	lm	ll	lm	--	ll	lm	lm	lm	lm	lm	lm	lm	lm	ll	lm	--	lm	lm	ll	ll	lm	ll	ll	lm	ll	lm	ll	lm	ll	lm	lm	lm	lm	lm	ll	lm	ll	ll	lm	ll	ll	lm	ll	lm
860	LG4	M08539	55.146	lm	ll	lm	ll	lm	lm	lm	lm	lm	lm	lm	lm	lm	lm	lm	ll	lm	lm	lm	lm	ll	ll	lm	ll	ll	lm	ll	lm	ll	lm	lm	lm	--	lm	lm	lm	ll	lm	ll	--	lm	ll	lm	lm	ll	lm
861	LG4	M11286	55.416	lm	ll	lm	lm	lm	lm	lm	lm	lm	lm	lm	lm	lm	lm	lm	ll	lm	lm	lm	lm	ll	ll	lm	ll	ll	lm	ll	lm	ll	lm	lm	lm	--	lm	lm	lm	ll	lm	ll	--	lm	ll	lm	lm	ll	lm
862	LG4	M04616	55.447	hk	hk	h-	h-	h-	h-	h-	h-	h-	h-	h-	h-	h-	h-	h-	kk	h-	h-	h-	h-	kk	kk	h-	kk	kk	h-	kk	h-	kk	h-	h-	h-	--	h-	h-	h-	kk	h-	kk	--	h-	kk	h-	h-	kk	h-
863	LG4	M01745	55.697	hk	hk	h-	h-	h-	h-	h-	h-	h-	h-	h-	h-	h-	h-	h-	kk	h-	h-	h-	h-	kk	kk	h-	kk	kk	h-	kk	h-	kk	h-	h-	h-	--	h-	h-	h-	kk	h-	kk	--	h-	kk	h-	h-	kk	h-
864	LG4	M03143	56.075	hk	hk	hk	kk	hk	hk	hh	hh	hk	hh	hh	hk	hk	--	hk	kk	hh	hh	hk	hh	kk	kk	hk	kk	kk	hh	kk	hh	kk	hh	hk	hk	hk	hk	hh	hh	--	kk	kk	kk	hk	kk	kk	hh	kk	hk
865	LG4	M09145	56.424	hk	hk	hk	hh	hk	hk	kk	kk	hk	kk	kk	hk	hk	kk	hk	hh	kk	kk	hk	kk	hh	hh	hk	hh	hh	kk	hh	kk	hh	kk	h-	hk	hk	hk	kk	kk	hk	hk	hh	hh	kk	hh	hk	kk	hh	hk
866	LG4	M07183	56.653	lm	ll	lm	lm	lm	--	ll	ll	--	ll	ll	--	lm	ll	lm	lm	ll	lm	lm	ll	lm	lm	lm	lm	lm	ll	lm	ll	lm	lm	--	--	lm	lm	ll	ll	lm	lm	lm	lm	ll	lm	lm	ll	lm	lm
867	LG4	M69922	56.706	hk	hk	hk	hh	hk	hk	kk	kk	hk	kk	kk	hk	hk	kk	hk	hh	k-	hk	hk	kk	hh	hh	hk	hh	hh	kk	hh	kk	hh	kk	hk	hk	hk	hk	kk	kk	h-	hk	hh	hh	kk	hh	hk	kk	hh	h-
868	LG4	M55092	58.072	hk	hk	hk	--	hk	hk	--	hh	hk	--	hh	kk	hk	hh	hk	kk	h-	hh	hk	hh	kk	kk	kk	kk	kk	hh	kk	hh	kk	hh	kk	hk	hk	hk	hh	hh	--	hk	kk	--	hk	kk	hk	hh	kk	hk
869	LG4	M54486	58.766	hk	hk	hk	hh	hk	hk	kk	kk	hk	kk	kk	hk	hk	kk	hk	hh	kk	kk	hk	kk	hh	hh	hh	hh	hh	kk	hh	kk	hh	kk	hh	hk	hk	hk	kk	kk	hk	hk	hh	hh	hk	hh	hk	kk	hh	hk
870	LG4	M54488	58.891	hk	hk	hk	hh	hk	hk	kk	kk	hk	kk	kk	hk	hk	kk	hk	hh	kk	hk	hk	kk	hh	hh	hh	hh	hh	kk	hh	kk	hh	kk	hh	hk	hk	hk	kk	kk	hk	hk	hh	hh	hk	hh	hk	kk	hh	hk
871	LG4	M54456	59.125	hk	hk	hk	hh	hk	hh	--	kk	hk	kk	kk	--	hk	kk	hk	hh	--	kk	hk	kk	hh	hh	hh	hh	hh	kk	hh	kk	hh	kk	--	hk	hk	hh	kk	kk	--	hk	hh	hh	hk	hh	hk	kk	hh	hk
872	LG4	M62525	59.401	lm	ll	--	ll	lm	ll	lm	lm	--	lm	lm	--	ll	--	lm	ll	lm	--	lm	lm	ll	ll	ll	ll	ll	lm	ll	lm	ll	lm	ll	lm	lm	--	lm	lm	lm	lm	ll	ll	ll	ll	--	lm	ll	lm
873	LG4	M09568	59.831	lm	ll	lm	ll	lm	ll	lm	lm	lm	lm	lm	lm	lm	lm	lm	ll	lm	lm	lm	lm	ll	ll	ll	ll	ll	lm	ll	lm	ll	lm	ll	lm	--	lm	lm	lm	lm	lm	ll	ll	--	ll	lm	lm	ll	lm
874	LG4	M10903	59.95	lm	ll	lm	ll	lm	ll	lm	lm	lm	lm	lm	lm	lm	lm	lm	ll	lm	lm	lm	lm	ll	ll	ll	ll	ll	lm	ll	lm	ll	lm	ll	lm	--	lm	lm	lm	lm	lm	ll	ll	--	ll	lm	lm	ll	lm
875	LG4	cms13243	60.136	hk	hk	hh	kk	hk	hh	--	kk	hk	kk	kk	hk	hk	kk	hk	hh	--	kk	hk	kk	hh	hh	hh	hh	hh	kk	hh	kk	hh	kk	hh	hk	hk	hk	kk	kk	hk	hk	hh	--	hk	--	hk	kk	hh	hk
876	LG4	M04461	60.351	nn	np	--	np	np	np	--	--	np	--	nn	--	np	--	np	np	--	--	nn	nn	np	np	np	--	np	nn	np	nn	np	nn	np	np	np	nn	nn	nn	nn	np	np	nn	--	np	np	nn	np	nn
877	LG4	M05906	60.66	nn	np	--	np	np	np	--	--	np	--	nn	--	np	--	np	np	--	--	--	nn	np	np	np	--	np	nn	np	nn	np	nn	np	np	np	nn	nn	nn	nn	np	np	nn	--	np	np	nn	np	nn
878	LG4	M10359	60.804	lm	ll	lm	lm	lm	ll	lm	lm	lm	lm	lm	lm	lm	lm	lm	ll	lm	lm	lm	lm	--	ll	ll	ll	ll	lm	ll	lm	ll	lm	ll	lm	lm	lm	lm	lm	lm	lm	ll	ll	--	ll	--	lm	ll	lm
879	LG4	M03611	61.574	lm	ll	lm	lm	lm	lm	ll	ll	lm	ll	ll	lm	lm	--	lm	lm	ll	ll	lm	ll	lm	lm	lm	lm	lm	ll	lm	ll	lm	ll	lm	lm	lm	lm	ll	ll	lm	lm	lm	lm	lm	lm	lm	ll	lm	lm
880	LG4	M10217	61.68	hk	hk	hk	kk	hk	kk	hh	hh	hk	hh	hh	hk	hk	hh	hk	kk	hh	hh	hk	hh	kk	kk	kk	kk	kk	hh	kk	hh	kk	hh	kk	hk	hk	hk	hh	hh	hk	hk	kk	kk	hk	kk	k-	hh	kk	hk
881	LG4	M09610	61.691	hk	hk	hk	kk	hk	kk	hh	hh	hk	hh	hh	hk	hk	hh	hk	kk	hh	hh	hk	hh	kk	kk	kk	kk	kk	hh	kk	hh	kk	hh	kk	hk	hk	h-	hh	hh	hk	hk	kk	kk	hk	kk	k-	hh	kk	hk
882	LG4	M04277	62.171	lm	ll	lm	lm	--	--	ll	ll	lm	ll	ll	lm	--	ll	lm	lm	ll	ll	ll	ll	lm	lm	lm	lm	lm	ll	lm	ll	lm	ll	lm	lm	lm	--	ll	ll	lm	lm	lm	lm	--	lm	ll	ll	lm	lm
883	LG4	M72085	62.343	hk	hk	hk	hh	hk	hh	kk	kk	hk	kk	kk	hk	hk	kk	hk	hh	--	hk	hk	kk	hh	hh	hh	hh	hh	kk	hh	kk	hh	kk	--	hk	hk	hk	kk	kk	hk	hk	hh	hh	hk	hh	hk	kk	hh	h-
884	LG4	M02482	62.633	hk	hk	hk	hk	hk	hh	kk	kk	hk	kk	kk	hk	hk	kk	hk	hh	kk	kk	hk	kk	hh	hh	hh	hh	hh	kk	hh	kk	hh	kk	hh	hk	hk	hk	kk	kk	hk	hk	hh	hh	kk	hh	hk	kk	hh	hk
885	LG4	M07211	62.832	hk	hk	hk	hk	hk	hh	kk	kk	hk	kk	kk	hk	hk	kk	hk	hh	kk	kk	hk	kk	hh	hh	hh	hh	hh	kk	hh	kk	hh	kk	hh	hk	hk	hk	kk	kk	hk	hk	hh	hh	kk	hh	hk	kk	hh	hk
886	LG4	M03147	62.989	nn	np	np	--	np	np	nn	nn	np	nn	nn	np	--	np	np	np	nn	--	--	nn	np	np	np	np	np	nn	np	nn	np	nn	np	np	np	--	nn	nn	np	--	np	np	--	np	nn	nn	np	--
887	LG4	M04080	63.331	lm	ll	lm	ll	lm	ll	lm	lm	--	lm	lm	lm	lm	lm	lm	ll	lm	lm	--	lm	ll	ll	ll	ll	ll	lm	ll	lm	ll	lm	ll	lm	lm	lm	lm	lm	lm	ll	ll	ll	--	ll	lm	lm	ll	lm
888	LG4	M04545	63.45	hk	hk	--	hk	hk	kk	hh	hh	hk	hh	hh	h-	hk	hh	hk	kk	hh	hh	hk	hh	kk	kk	kk	kk	kk	hh	kk	hh	kk	hh	kk	hk	hk	hk	hh	hh	--	kk	kk	kk	hh	kk	--	hh	kk	hk
889	LG4	M01219	63.538	hk	hk	--	hk	hk	hh	kk	kk	hk	kk	kk	k-	hk	kk	hk	hh	kk	kk	hk	kk	hh	hh	hh	hh	hh	kk	hh	kk	hh	kk	hh	hk	hk	hk	kk	kk	--	hh	hh	hh	kk	hh	--	kk	hh	hk
890	LG4	M61942	63.614	lm	ll	lm	lm	lm	ll	lm	lm	lm	lm	lm	--	lm	lm	lm	ll	lm	lm	ll	lm	ll	ll	ll	ll	ll	lm	ll	lm	ll	lm	ll	lm	--	lm	lm	lm	--	ll	ll	ll	--	ll	lm	lm	ll	--
891	LG4	M05963	63.913	lm	ll	lm	ll	lm	ll	lm	lm	lm	lm	lm	lm	lm	lm	lm	ll	lm	lm	lm	lm	ll	ll	ll	ll	ll	lm	ll	lm	ll	lm	ll	lm	lm	lm	lm	lm	lm	ll	ll	ll	lm	ll	lm	--	ll	--
892	LG4	M03680	64.115	hk	hk	h-	h-	h-	kk	h-	h-	h-	--	h-	h-	h-	h-	h-	kk	h-	h-	h-	h-	kk	kk	--	kk	kk	h-	kk	h-	kk	h-	--	h-	h-	h-	h-	h-	h-	kk	kk	--	h-	kk	h-	h-	kk	h-
893	LG4	M03107	64.227	hk	hk	--	h-	h-	kk	h-	h-	h-	kk	h-	--	h-	h-	h-	kk	h-	h-	h-	h-	--	kk	kk	kk	kk	h-	kk	h-	kk	--	--	h-	h-	h-	h-	h-	h-	kk	kk	--	h-	--	h-	h-	kk	h-
894	LG4	M07674	64.659	hk	hk	hh	hk	hk	hh	kk	kk	hk	hh	kk	hk	hk	kk	hk	hh	--	kk	hk	kk	hh	hh	hh	hh	hh	k-	hh	kk	hh	kk	hh	hk	hk	hk	kk	kk	hk	hh	hh	hh	hk	hh	hk	kk	hh	hk
895	LG4	cms13350	64.974	hk	hk	kk	hh	hk	kk	hh	hh	hk	hh	hh	hk	hk	hh	hk	kk	hh	hh	hk	hh	kk	kk	kk	kk	kk	hh	kk	hh	kk	hh	kk	hk	hk	hk	hh	--	--	kk	kk	--	hk	kk	hk	hh	kk	hk
896	LG4	M04509	65.363	lm	ll	ll	--	lm	ll	lm	lm	lm	--	lm	lm	lm	lm	--	ll	lm	lm	lm	lm	ll	ll	ll	ll	ll	lm	ll	lm	ll	lm	ll	lm	ll	--	lm	lm	--	ll	ll	ll	--	ll	ll	lm	ll	lm
897	LG4	M04944	65.869	hk	hk	hk	hk	hk	kk	hh	hh	hk	hk	hh	hk	hk	hh	hk	kk	hh	hh	hk	hh	kk	kk	kk	kk	kk	hh	kk	hh	kk	--	kk	hk	k-	hk	hh	hh	hk	kk	kk	--	hk	kk	k-	hh	kk	hk
898	LG4	M01749	66.013	hk	hk	k-	hk	hk	kk	hh	hh	hk	hk	hh	hk	hk	hh	hk	kk	hh	hh	hk	hh	kk	kk	kk	kk	kk	hh	kk	hh	kk	--	kk	hk	k-	hk	hh	hh	hk	kk	kk	--	hk	kk	k-	hh	kk	hk
899	LG4	M01440	66.248	hk	hk	k-	hk	hk	kk	h-	hh	hk	hk	hh	hk	hk	hh	hk	kk	hh	hh	hk	hh	kk	kk	kk	kk	kk	hh	kk	hh	kk	--	kk	hk	k-	hk	hh	hh	hk	kk	kk	--	hk	kk	k-	hh	kk	hk
900	LG4	M05302	66.257	hk	hk	h-	hk	hk	hh	k-	kk	hk	hk	kk	hk	hk	kk	hk	hh	kk	kk	hk	kk	hh	hh	hh	hh	hh	kk	hh	kk	hh	--	hh	hk	h-	hk	kk	kk	hk	hh	hh	--	hk	hh	h-	kk	hh	hk
901	LG4	M06137	66.554	nn	np	nn	--	--	--	nn	nn	np	nn	nn	--	np	nn	--	--	nn	nn	nn	nn	--	np	np	np	np	nn	np	nn	--	nn	np	np	np	nn	nn	nn	nn	--	np	np	--	np	np	nn	nn	--
902	LG4	M11899	66.973	lm	ll	lm	lm	lm	lm	ll	ll	--	ll	ll	--	lm	ll	--	lm	ll	lm	lm	ll	lm	lm	lm	lm	lm	ll	lm	ll	lm	ll	lm	lm	lm	--	ll	ll	lm	lm	lm	lm	lm	lm	lm	ll	lm	lm
903	LG4	M54748	67.073	lm	ll	lm	lm	lm	lm	ll	ll	lm	lm	ll	lm	lm	ll	lm	lm	ll	--	lm	--	lm	lm	lm	lm	lm	ll	lm	ll	lm	ll	lm	lm	lm	lm	ll	ll	--	lm	lm	lm	lm	lm	lm	--	lm	lm
904	LG4	M02926	67.208	lm	ll	ll	--	--	--	ll	ll	lm	ll	ll	--	lm	ll	--	--	ll	ll	ll	ll	lm	lm	lm	lm	lm	ll	lm	ll	--	ll	lm	lm	lm	ll	ll	ll	ll	--	lm	lm	--	lm	lm	ll	ll	--
905	LG4	M11128	67.306	hk	hk	kk	hh	hk	hh	kk	kk	hk	hk	kk	hk	hk	kk	hk	hh	kk	kk	hk	kk	hh	hh	hh	hh	hh	kk	hh	kk	hh	kk	hh	hk	k-	hk	kk	kk	hk	hh	hh	hh	hk	hh	hk	kk	hh	hk
906	LG4	M04044	67.477	hk	hk	kk	hh	hk	hh	kk	kk	hk	hk	kk	hk	hk	kk	hk	hh	kk	kk	hk	kk	hh	hh	hh	hh	hh	kk	hh	kk	hh	kk	hh	hk	hk	hk	kk	kk	hk	hh	hh	hh	k-	hh	k-	kk	hh	hk
907	LG4	M04969	67.648	lm	ll	--	--	lm	lm	ll	ll	lm	lm	ll	--	lm	ll	lm	lm	ll	ll	--	ll	lm	lm	lm	lm	lm	ll	lm	ll	lm	ll	lm	lm	lm	lm	ll	ll	lm	lm	lm	lm	--	lm	lm	--	lm	lm
908	LG4	M10022	67.868	hk	hk	hh	kk	hk	kk	hh	hh	hk	h-	hh	hk	hk	hh	hk	kk	hh	hh	hk	hh	kk	kk	kk	kk	kk	hh	kk	hh	kk	hh	kk	hk	h-	hk	hh	hh	hk	kk	kk	kk	hk	kk	hk	hh	kk	hk
909	LG4	M07551	68.158	lm	ll	ll	lm	lm	lm	ll	ll	lm	lm	ll	lm	--	ll	lm	lm	ll	ll	lm	ll	lm	lm	lm	lm	--	ll	lm	ll	lm	ll	lm	lm	ll	ll	ll	ll	lm	lm	lm	lm	lm	lm	lm	ll	lm	lm
910	LG4	M04177	68.402	hk	hk	--	hh	hk	hh	kk	kk	hk	--	kk	hh	hk	kk	hk	hh	k-	kk	hk	kk	hh	hh	hh	hh	hh	kk	hh	kk	hk	kk	hh	hk	hk	hk	kk	kk	h-	hh	hh	hh	hk	hh	hk	k-	hh	hk
911	LG4	M10569	69.157	hk	hk	hh	kk	hk	kk	hh	hh	hk	hk	hh	hk	hk	hh	hk	kk	hh	hh	hk	hh	kk	kk	kk	kk	kk	hh	kk	hh	kk	hh	kk	hk	hk	hk	hh	hh	hk	kk	kk	kk	hk	kk	h-	hh	kk	hk
912	LG4	M08028	69.427	lm	ll	ll	lm	lm	lm	ll	ll	lm	lm	ll	lm	lm	ll	lm	lm	ll	ll	lm	ll	lm	lm	lm	lm	lm	ll	lm	ll	lm	ll	lm	lm	lm	lm	ll	ll	--	lm	lm	lm	lm	lm	--	ll	lm	lm
913	LG4	M10121	69.815	lm	ll	ll	lm	lm	lm	ll	--	lm	ll	lm	lm	lm	ll	lm	lm	ll	lm	lm	ll	lm	lm	lm	lm	lm	ll	lm	ll	lm	ll	lm	lm	lm	lm	ll	ll	--	lm	lm	lm	lm	lm	lm	ll	lm	lm
914	LG4	M00780	70.036	lm	ll	ll	lm	lm	lm	ll	lm	lm	ll	ll	--	lm	ll	lm	lm	ll	ll	lm	ll	lm	lm	lm	lm	lm	ll	lm	ll	lm	ll	lm	--	lm	lm	ll	ll	lm	lm	lm	lm	lm	lm	lm	--	lm	lm
915	LG4	M05734	70.317	lm	ll	ll	lm	lm	lm	ll	lm	lm	ll	ll	--	lm	ll	lm	lm	ll	ll	lm	ll	lm	lm	lm	lm	lm	ll	lm	ll	lm	ll	lm	--	lm	lm	ll	ll	lm	lm	lm	lm	lm	lm	lm	ll	lm	lm
916	LG4	M05942	70.48	hk	hk	hh	kk	hk	kk	hh	hh	hk	--	hk	hh	hk	hh	hk	kk	hh	hh	hk	hh	kk	kk	kk	kk	kk	hh	hk	hh	kk	hh	kk	hk	hk	hk	hh	hh	hk	kk	kk	kk	hk	kk	hk	hh	kk	hk
917	LG4	M53174	71.295	lm	ll	ll	lm	ll	lm	--	--	lm	lm	lm	lm	lm	ll	lm	lm	--	lm	lm	ll	--	lm	lm	ll	lm	lm	lm	lm	lm	ll	lm	lm	lm	ll	lm	ll	--	lm	lm	lm	lm	lm	lm	lm	--	lm
918	LG4	M53177	71.694	lm	ll	ll	lm	ll	lm	--	--	lm	lm	lm	lm	lm	ll	lm	lm	--	lm	lm	ll	--	lm	lm	ll	lm	lm	lm	lm	lm	ll	lm	lm	lm	ll	lm	ll	--	lm	lm	lm	lm	lm	lm	lm	--	lm
919	LG4	M53172	71.762	lm	ll	ll	lm	ll	lm	--	--	lm	lm	lm	lm	lm	ll	lm	lm	--	lm	lm	ll	--	lm	lm	ll	lm	lm	lm	lm	lm	ll	lm	lm	lm	ll	lm	ll	--	lm	lm	lm	lm	lm	lm	lm	--	lm
920	LG4	M08508	72.205	hk	hk	hh	hk	hk	kk	hh	hh	hk	hk	hk	hk	hk	hh	hk	kk	hh	--	hk	hh	kk	kk	kk	kk	kk	hh	hk	hh	kk	hh	kk	hk	hk	hk	hh	hh	hk	kk	kk	kk	hk	kk	hk	hh	kk	hk
921	LG4	M61906	73.096	nn	np	np	nn	np	nn	np	--	np	nn	nn	nn	nn	--	np	nn	np	--	np	np	nn	nn	nn	nn	nn	np	nn	np	nn	np	nn	nn	nn	nn	np	np	np	nn	nn	np	np	nn	nn	np	nn	np
922	LG4	cms13297	73.262	lm	ll	ll	lm	ll	--	lm	lm	ll	lm	lm	lm	lm	lm	ll	ll	lm	lm	ll	lm	ll	ll	ll	ll	ll	lm	lm	lm	ll	lm	ll	lm	lm	lm	lm	lm	ll	ll	ll	--	ll	ll	lm	lm	ll	ll
923	LG4	M61903	73.447	nn	np	np	nn	np	nn	np	--	np	nn	nn	nn	nn	--	np	nn	np	--	np	np	nn	nn	nn	nn	nn	np	nn	np	nn	np	nn	nn	nn	nn	np	np	np	nn	nn	nn	np	nn	nn	np	nn	np
924	LG4	M06653	73.984	lm	ll	lm	ll	ll	ll	lm	lm	ll	lm	lm	lm	lm	lm	ll	ll	lm	lm	ll	lm	ll	ll	ll	ll	ll	lm	lm	lm	ll	lm	--	lm	ll	lm	lm	lm	ll	ll	ll	ll	ll	ll	lm	lm	ll	ll
925	LG4	M10163	74.358	hk	hk	hh	hk	hh	kk	hh	hh	hk	h-	kk	hk	kk	hh	hk	kk	hh	--	hk	hh	kk	kk	kk	hk	kk	hh	hk	hh	kk	--	kk	hk	hk	hh	hh	hh	hk	kk	kk	kk	hk	kk	hk	hh	h-	hk
926	LG4	M05111	74.861	lm	ll	ll	lm	ll	lm	ll	ll	lm	--	lm	--	lm	--	lm	lm	ll	ll	lm	ll	lm	lm	lm	lm	lm	ll	lm	ll	lm	--	--	--	--	ll	--	ll	--	lm	lm	lm	ll	lm	lm	ll	ll	--
927	LG4	M56608	75.411	lm	ll	ll	--	lm	lm	ll	ll	lm	ll	--	ll	--	ll	lm	lm	ll	ll	ll	ll	lm	lm	lm	lm	lm	ll	--	ll	--	ll	ll	lm	--	lm	ll	ll	lm	lm	lm	ll	ll	lm	--	ll	lm	lm
928	LG4	M10256	76.066	lm	ll	lm	ll	ll	ll	lm	--	ll	ll	--	lm	ll	ll	ll	ll	lm	lm	ll	lm	ll	ll	ll	ll	ll	lm	--	lm	ll	lm	ll	lm	lm	lm	lm	lm	ll	ll	ll	ll	ll	ll	lm	lm	ll	ll
929	LG4	M04219	76.532	lm	ll	lm	ll	ll	ll	lm	lm	ll	lm	lm	lm	lm	--	ll	ll	lm	ll	ll	--	ll	ll	ll	ll	ll	lm	lm	lm	ll	lm	ll	lm	lm	lm	lm	lm	ll	ll	ll	ll	ll	ll	lm	lm	ll	ll
930	LG4	M54946	76.815	hk	hk	hh	kk	hh	kk	hh	hh	hk	hk	kk	hk	kk	hh	kk	kk	hh	--	hk	hh	kk	kk	kk	hk	kk	hh	hk	hh	kk	--	k-	hk	hk	hh	hh	hh	hk	kk	kk	kk	hk	kk	hh	hh	kk	hk
931	LG4	M54949	77.2	hk	hk	kk	hh	kk	hh	kk	kk	hk	hk	hh	hk	hh	kk	hh	hh	kk	--	hk	kk	hh	hh	hh	hk	hh	kk	hk	kk	hh	--	h-	hk	hk	kk	kk	kk	hk	hh	hh	hh	hk	hh	kk	kk	hh	hk
932	LG4	cms13395	78.022	nn	np	nn	nn	nn	np	nn	nn	np	nn	np	nn	np	nn	np	np	nn	nn	np	nn	np	np	np	np	np	--	np	np	np	nn	np	nn	nn	nn	nn	nn	np	np	np	--	np	np	nn	nn	nn	np
933	LG4	M56609	78.029	lm	ll	--	lm	lm	lm	lm	ll	lm	--	--	ll	lm	lm	lm	lm	ll	ll	--	ll	lm	lm	lm	lm	lm	lm	lm	ll	--	--	ll	lm	--	lm	--	ll	lm	lm	lm	ll	--	lm	--	ll	lm	lm
934	LG4	M01339	78.695	hk	hk	hk	hk	hk	hk	kk	--	hk	--	kk	hk	h-	--	hk	hh	--	--	h-	hk	hk	h-	hh	h-	hh	--	hh	hk	hk	--	hh	hk	h-	hk	kk	kk	hk	hh	hk	hh	hh	hh	h-	kk	h-	hk
935	LG4	M09231	79.204	lm	ll	ll	lm	ll	lm	ll	ll	lm	lm	lm	lm	lm	ll	lm	lm	ll	ll	lm	ll	lm	ll	lm	ll	lm	ll	lm	ll	lm	ll	lm	lm	lm	ll	ll	ll	lm	lm	lm	lm	--	lm	lm	ll	ll	lm
936	LG4	M05572	79.586	nn	np	np	nn	np	nn	np	np	np	nn	nn	nn	nn	--	np	nn	np	np	np	np	nn	nn	nn	np	nn	np	nn	np	nn	np	nn	nn	nn	np	--	np	np	nn	nn	nn	np	nn	nn	np	nn	np
937	LG4	M05043	79.811	lm	ll	lm	ll	lm	ll	lm	lm	ll	lm	ll	ll	ll	lm	ll	ll	lm	ll	ll	lm	ll	ll	ll	ll	ll	lm	lm	lm	ll	lm	--	lm	lm	lm	lm	lm	ll	ll	ll	ll	ll	ll	lm	lm	lm	ll
938	LG4	M08512	79.953	lm	ll	lm	ll	lm	ll	lm	lm	ll	lm	ll	ll	ll	lm	ll	ll	lm	ll	ll	lm	ll	ll	ll	ll	ll	lm	lm	lm	ll	lm	--	lm	lm	lm	lm	lm	ll	ll	ll	ll	ll	ll	lm	lm	lm	ll
939	LG4	M70828	80.144	nn	np	np	nn	np	nn	np	np	np	nn	nn	nn	nn	np	np	nn	np	--	np	np	nn	nn	nn	np	nn	np	nn	np	nn	--	nn	nn	nn	np	--	np	np	nn	nn	nn	np	nn	nn	np	nn	np
940	LG4	M71984	80.298	hk	hk	hh	k-	hh	hk	hh	hh	hk	hh	kk	hk	hk	hh	hk	k-	hh	--	kk	hh	kk	kk	hk	kk	hk	hh	hk	hh	k-	--	kk	hk	hk	hh	hh	hh	--	hk	hk	kk	hk	hk	hk	hh	hk	hk
941	LG4	M66286	81.067	hk	hk	hh	hk	hh	hk	hh	hh	hk	hk	hk	hk	hk	hh	kk	kk	hh	hh	hk	hh	kk	hk	kk	hh	kk	hh	hk	hh	hk	hh	hk	hk	h-	hh	hh	hh	hk	kk	kk	kk	hk	kk	k-	hk	hh	hk
942	LG4	M54950	81.379	nn	np	np	nn	np	nn	np	np	np	nn	nn	nn	nn	np	nn	nn	--	--	np	np	nn	nn	nn	np	nn	np	nn	np	nn	--	nn	nn	nn	np	np	np	np	nn	nn	nn	np	nn	nn	np	nn	np
943	LG4	M54945	81.531	nn	np	np	nn	np	nn	np	np	np	nn	nn	nn	nn	np	nn	nn	--	--	np	np	nn	nn	nn	np	nn	np	nn	np	nn	--	nn	nn	nn	np	np	np	np	nn	nn	nn	np	nn	nn	np	nn	np
944	LG4	M00983	81.733	lm	ll	ll	lm	ll	lm	ll	ll	lm	lm	lm	lm	lm	ll	lm	lm	ll	ll	lm	ll	lm	lm	lm	ll	lm	ll	lm	ll	lm	ll	lm	lm	ll	ll	ll	ll	lm	lm	lm	lm	lm	lm	lm	lm	ll	--
945	LG4	M54168	82.6	hk	hk	hh	kk	hh	kk	hh	hh	hk	hk	kk	hk	kk	hh	kk	kk	hh	hh	hk	hh	kk	hk	kk	hh	kk	hh	hk	hk	kk	hh	kk	hk	hk	hh	hh	hh	k-	kk	kk	kk	hk	kk	kk	hk	hh	hk
946	LG4	M05749	83.016	lm	ll	ll	lm	ll	lm	ll	ll	lm	--	lm	lm	lm	ll	lm	lm	ll	ll	lm	ll	lm	lm	lm	ll	lm	lm	lm	lm	lm	ll	lm	lm	lm	--	ll	ll	lm	lm	lm	--	lm	lm	lm	lm	ll	lm
947	LG4	M07316	83.046	lm	ll	ll	lm	ll	lm	ll	ll	lm	--	lm	lm	lm	ll	lm	lm	ll	ll	lm	ll	lm	lm	lm	ll	lm	lm	lm	lm	lm	ll	lm	lm	lm	--	ll	ll	lm	lm	lm	--	lm	lm	lm	lm	ll	lm
948	LG4	M64804	83.455	nn	np	nn	np	nn	--	nn	nn	--	np	np	nn	np	nn	np	np	nn	nn	nn	nn	np	np	np	nn	np	--	nn	--	--	nn	np	np	nn	nn	nn	nn	nn	np	np	nn	nn	np	--	nn	nn	nn
949	LG4	M00948	83.585	lm	ll	ll	lm	ll	lm	ll	ll	lm	--	lm	lm	lm	ll	lm	lm	ll	ll	lm	ll	lm	lm	lm	ll	lm	lm	lm	lm	lm	ll	lm	lm	lm	ll	ll	ll	lm	lm	lm	--	lm	lm	lm	lm	ll	lm
950	LG4	M64802	83.588	nn	np	nn	np	nn	--	nn	nn	--	np	np	nn	np	nn	np	np	nn	--	nn	nn	np	np	np	nn	np	--	nn	--	--	nn	np	np	nn	nn	nn	nn	nn	np	np	nn	nn	np	np	nn	nn	nn
951	LG4	M07649	84.073	hk	hk	h-	h-	h-	kk	h-	h-	h-	h-	kk	h-	kk	h-	kk	kk	h-	h-	h-	h-	kk	--	kk	h-	kk	h-	--	h-	kk	h-	kk	--	h-	h-	h-	h-	h-	kk	kk	kk	--	kk	kk	--	h-	--
952	LG4	M61630	84.636	lm	ll	ll	lm	ll	lm	ll	ll	lm	lm	lm	lm	lm	ll	lm	lm	ll	--	lm	ll	lm	lm	lm	ll	lm	lm	lm	lm	lm	--	lm	lm	lm	ll	ll	ll	lm	lm	lm	lm	lm	lm	lm	lm	ll	lm
953	LG4	M61629	84.646	lm	ll	ll	--	ll	lm	ll	ll	lm	lm	lm	lm	lm	ll	lm	lm	ll	--	lm	ll	lm	lm	lm	ll	lm	lm	lm	lm	lm	--	lm	lm	lm	ll	ll	ll	lm	lm	lm	lm	lm	lm	lm	lm	ll	lm
954	LG4	M02060	84.82	lm	ll	ll	lm	ll	lm	ll	ll	lm	lm	lm	--	lm	ll	lm	lm	ll	ll	lm	ll	lm	lm	lm	ll	lm	lm	lm	lm	lm	ll	lm	lm	lm	ll	ll	ll	lm	lm	lm	lm	lm	lm	lm	lm	ll	lm
955	LG4	M08394	85.44	hk	hk	hh	kk	hh	kk	hh	hh	kk	kk	kk	hk	kk	hk	kk	kk	--	--	kk	hh	kk	kk	kk	hh	kk	hk	hk	kk	kk	hh	kk	hk	hk	hh	hh	hh	kk	hk	kk	kk	kk	kk	kk	hk	hh	kk
956	LG4	M03596	85.777	lm	ll	ll	lm	ll	lm	ll	ll	lm	lm	lm	lm	lm	ll	lm	lm	ll	--	lm	ll	lm	lm	lm	ll	lm	lm	--	lm	lm	ll	lm	lm	lm	ll	ll	ll	ll	lm	lm	lm	lm	lm	lm	ll	ll	--
957	LG4	M01775	86.147	lm	ll	ll	lm	ll	lm	ll	ll	lm	lm	lm	lm	lm	ll	lm	lm	ll	ll	lm	ll	lm	lm	lm	ll	lm	lm	lm	lm	lm	ll	lm	lm	lm	ll	ll	ll	lm	--	lm	lm	lm	lm	lm	lm	ll	lm
958	LG4	M11486	86.506	lm	ll	ll	lm	ll	lm	ll	ll	lm	lm	lm	--	lm	ll	lm	lm	ll	ll	lm	ll	lm	lm	lm	ll	lm	lm	--	lm	lm	ll	lm	lm	lm	ll	ll	ll	lm	--	lm	lm	lm	lm	lm	lm	ll	lm
959	LG4	M62494	86.922	lm	ll	ll	--	ll	lm	ll	ll	lm	lm	lm	lm	lm	ll	lm	lm	ll	ll	lm	ll	lm	lm	lm	ll	lm	lm	lm	lm	lm	ll	lm	lm	lm	ll	--	ll	ll	lm	lm	lm	lm	lm	lm	--	ll	lm
960	LG4	M10171	86.968	nn	np	np	nn	np	nn	np	np	np	--	nn	--	nn	--	nn	nn	nn	np	--	np	nn	np	nn	np	nn	--	np	np	nn	np	nn	np	np	np	np	np	--	--	nn	nn	nn	nn	nn	nn	np	--
961	LG4	M00866	87.559	hk	hk	kk	hk	kk	hh	kk	kk	hk	hk	hh	hk	hh	kk	hh	hh	kk	kk	hk	kk	hh	hk	hh	kk	hh	hk	hk	hk	hh	kk	hh	hk	hk	kk	kk	kk	hk	hk	hh	hh	hk	hh	hh	hk	kk	hk
962	LG4	M03426	87.938	hk	hk	kk	hk	kk	hh	kk	kk	hk	hk	h-	hk	hh	kk	hh	hh	kk	kk	hk	kk	hh	hk	hh	kk	hh	hk	hk	hk	hh	kk	hh	hk	hk	kk	kk	kk	hk	hk	hh	hh	hk	hh	hh	hk	kk	hk
963	LG4	M00081	87.954	hk	hk	hh	hk	hh	kk	hh	hh	hk	hk	k-	hk	kk	hh	kk	kk	hh	hh	hk	hh	kk	hk	kk	hh	kk	hk	hk	hk	kk	hh	kk	hk	hk	hh	hh	hh	hk	hk	kk	kk	hk	kk	kk	hk	hh	hk
964	LG4	M03277	87.997	hk	hk	hh	hk	hh	kk	hh	hh	hk	hk	--	hk	kk	hh	kk	kk	hh	hh	hk	hh	kk	hk	kk	hh	kk	hk	hk	hk	kk	hh	kk	hk	hk	hh	hh	hh	hk	hk	kk	kk	hk	kk	kk	hk	hh	hk
965	LG4	M01862	88.377	nn	np	np	np	np	nn	np	nn	np	nn	nn	nn	nn	np	nn	nn	np	--	np	np	nn	np	nn	np	nn	np	nn	np	nn	np	nn	--	nn	np	np	np	nn	nn	nn	nn	nn	nn	nn	--	np	np
966	LG4	M06633	89.164	hk	hk	kk	hk	kk	hh	kk	kk	hk	hk	hh	hk	hh	kk	hh	hh	kk	kk	hk	kk	hh	hk	hh	kk	hh	hk	hk	hk	hh	kk	hh	hk	hk	kk	kk	kk	hk	hk	hh	hh	hk	hh	hh	hk	kk	hk
967	LG4	M06564	89.187	hk	hk	kk	hk	kk	hh	kk	kk	hk	hk	hh	hk	hh	kk	hh	hh	kk	kk	hk	kk	hh	hk	hh	kk	hh	hk	hk	hk	hh	kk	hh	hk	hk	kk	kk	kk	hk	hk	hh	hh	hk	hh	hh	hk	kk	hk
968	LG4	M54165	90.009	lm	ll	lm	ll	lm	ll	lm	lm	ll	lm	ll	lm	ll	ll	ll	ll	lm	lm	ll	lm	ll	ll	ll	lm	ll	lm	lm	ll	ll	lm	ll	lm	lm	lm	lm	lm	ll	ll	ll	ll	ll	ll	ll	lm	lm	ll
969	LG4	M06422	90.453	nn	np	np	nn	np	nn	np	nn	np	nn	nn	nn	nn	np	nn	nn	nn	nn	--	np	nn	np	nn	--	nn	--	nn	--	nn	np	nn	nn	nn	np	nn	--	np	nn	nn	nn	np	nn	nn	nn	np	np
970	LG4	M07741	90.647	lm	ll	ll	lm	lm	ll	lm	lm	lm	ll	ll	lm	ll	lm	ll	ll	lm	--	lm	lm	ll	lm	ll	lm	ll	lm	--	lm	ll	lm	--	--	--	lm	lm	lm	ll	ll	ll	ll	lm	ll	ll	lm	lm	--
971	LG4	M51856	91.3	hk	hk	hh	hk	hh	kk	hh	hh	hk	hk	kk	hh	kk	--	kk	kk	hh	--	hk	hh	kk	hk	kk	hh	kk	k-	k-	hk	kk	hh	kk	hk	--	hh	hh	hh	kk	hk	kk	kk	hk	kk	kk	hk	hh	hk
972	LG4	M53793	91.398	lm	ll	lm	lm	lm	ll	--	lm	ll	lm	ll	lm	ll	lm	ll	ll	lm	lm	ll	lm	ll	ll	ll	lm	ll	lm	lm	ll	ll	lm	ll	lm	lm	lm	lm	lm	--	lm	ll	ll	ll	ll	ll	lm	lm	ll
973	LG4	M07597	91.635	lm	ll	lm	lm	lm	ll	lm	lm	ll	lm	ll	lm	ll	lm	ll	ll	lm	lm	ll	lm	ll	ll	ll	lm	ll	lm	lm	ll	ll	lm	ll	lm	lm	lm	lm	lm	ll	lm	ll	ll	ll	ll	ll	lm	lm	ll
974	LG4	M00474	91.943	lm	ll	lm	lm	lm	ll	lm	lm	ll	lm	ll	lm	ll	lm	ll	ll	lm	lm	ll	lm	ll	ll	ll	lm	ll	lm	lm	ll	ll	lm	ll	lm	lm	lm	lm	lm	ll	lm	--	ll	--	ll	ll	lm	lm	ll
975	LG4	M69539	92.187	nn	np	--	nn	np	--	--	--	np	--	nn	--	nn	--	nn	nn	np	--	np	np	nn	np	nn	np	nn	np	nn	np	nn	--	nn	nn	nn	np	np	np	--	nn	nn	nn	np	nn	nn	nn	--	np
976	LG4	M04666	92.55	lm	ll	lm	ll	lm	ll	lm	lm	ll	lm	ll	lm	ll	--	ll	ll	lm	--	ll	lm	ll	ll	ll	lm	ll	lm	lm	ll	ll	lm	ll	lm	lm	lm	lm	lm	ll	lm	ll	--	ll	ll	ll	lm	lm	ll
977	LG4	M10559	92.764	nn	np	np	nn	np	nn	np	np	np	--	nn	nn	nn	--	nn	nn	np	nn	np	--	nn	np	nn	np	nn	nn	nn	np	nn	np	--	nn	nn	--	np	np	--	nn	nn	nn	nn	nn	nn	nn	np	np
978	LG4	M12111	93.496	hk	hk	kk	hk	kk	hk	kk	kk	hk	--	hh	hk	hk	k-	hk	hk	kk	kk	hk	kk	hk	hk	hk	kk	hk	hk	hk	hk	hh	kk	hk	hk	hk	kk	kk	kk	hk	hk	hh	hh	hk	hk	h-	hk	kk	hk
979	LG4	M05806	93.646	lm	ll	ll	lm	ll	lm	ll	ll	--	lm	lm	--	lm	lm	lm	lm	ll	--	lm	ll	lm	ll	lm	ll	lm	--	lm	lm	lm	ll	lm	--	lm	ll	ll	ll	--	lm	lm	--	lm	lm	--	lm	ll	lm
980	LG4	cms13356	94.763	lm	ll	lm	lm	lm	ll	lm	lm	ll	ll	ll	lm	ll	lm	ll	ll	lm	lm	ll	lm	ll	ll	ll	lm	ll	lm	lm	ll	ll	lm	ll	lm	lm	lm	lm	lm	ll	lm	ll	lm	ll	ll	ll	lm	lm	ll
981	LG4	M01728	94.782	nn	np	--	np	np	nn	np	np	np	--	nn	nn	nn	--	nn	nn	np	np	np	np	nn	np	nn	np	nn	nn	nn	np	nn	--	nn	nn	nn	np	--	np	--	nn	nn	nn	np	nn	nn	nn	np	np
982	LG4	M06544	95.723	nn	np	np	np	np	nn	np	np	np	nn	nn	nn	nn	--	nn	nn	nn	np	np	np	nn	--	nn	np	nn	nn	nn	np	nn	nn	nn	nn	nn	np	np	np	np	nn	nn	nn	np	nn	nn	nn	np	np
983	LG4	M10969	95.909	lm	ll	lm	lm	lm	ll	lm	ll	lm	ll	ll	ll	ll	lm	ll	ll	lm	--	lm	lm	ll	lm	ll	lm	ll	lm	ll	lm	ll	lm	ll	--	ll	lm	lm	lm	ll	ll	ll	ll	ll	ll	ll	--	lm	lm
984	LG4	M70184	96.509	lm	ll	lm	lm	lm	ll	lm	lm	ll	ll	ll	lm	ll	lm	ll	ll	lm	lm	ll	lm	ll	ll	ll	lm	ll	lm	lm	ll	ll	lm	ll	lm	lm	lm	lm	lm	ll	lm	ll	ll	ll	ll	ll	lm	lm	ll
985	LG4	M62088	96.748	lm	ll	lm	ll	lm	ll	--	lm	ll	ll	ll	lm	ll	lm	ll	ll	lm	--	ll	lm	ll	ll	ll	lm	ll	lm	lm	ll	ll	--	--	lm	lm	lm	lm	lm	ll	lm	ll	ll	ll	ll	ll	--	lm	ll
986	LG4	cms13398	96.889	nn	np	nn	np	np	--	np	np	np	nn	nn	nn	nn	np	nn	nn	np	np	np	np	nn	np	nn	np	nn	nn	nn	np	nn	np	nn	nn	nn	np	np	np	np	nn	nn	nn	np	nn	nn	nn	np	np
987	LG4	M04133	96.981	hk	hk	h-	kk	h-	kk	h-	h-	--	--	kk	h-	kk	--	kk	kk	h-	--	h-	h-	--	h-	kk	h-	kk	h-	h-	h-	h-	h-	kk	h-	h-	h-	h-	h-	h-	h-	kk	--	h-	kk	kk	h-	--	h-
988	LG4	M57015	97.593	nn	np	np	nn	np	nn	np	np	np	--	nn	nn	nn	np	nn	nn	np	--	np	np	np	np	nn	np	nn	nn	nn	np	nn	np	--	nn	nn	np	np	np	np	nn	nn	nn	np	nn	nn	nn	np	np
989	LG4	M00756	98.239	lm	ll	lm	ll	lm	ll	lm	lm	ll	ll	ll	lm	ll	lm	ll	ll	lm	lm	ll	lm	ll	ll	--	lm	ll	lm	lm	ll	ll	lm	ll	lm	lm	lm	lm	lm	ll	lm	ll	--	ll	ll	ll	lm	ll	ll
990	LG4	M69037	98.317	nn	np	np	np	np	nn	np	np	np	nn	nn	nn	nn	nn	nn	nn	np	np	np	np	nn	np	nn	np	nn	nn	nn	np	nn	np	nn	nn	nn	np	np	np	np	nn	nn	nn	np	nn	nn	nn	np	np
991	LG4	M50669	98.85	nn	np	--	nn	np	--	--	--	np	nn	nn	nn	nn	--	nn	nn	np	--	np	np	nn	np	nn	np	nn	nn	nn	np	nn	--	--	nn	nn	np	np	--	--	nn	nn	nn	np	nn	nn	nn	np	np
992	LG4	M50670	98.962	nn	np	--	nn	np	--	--	--	np	nn	nn	nn	nn	--	nn	nn	np	--	np	np	nn	np	nn	np	nn	nn	nn	np	nn	--	--	nn	nn	np	np	--	--	nn	nn	nn	np	nn	nn	nn	np	np
993	LG4	M09364	99.587	lm	ll	--	ll	lm	ll	lm	lm	ll	ll	ll	lm	ll	--	ll	ll	lm	ll	ll	lm	ll	ll	ll	lm	ll	--	lm	ll	ll	ll	ll	lm	ll	lm	lm	lm	ll	lm	ll	ll	ll	ll	ll	lm	ll	ll
994	LG4	M72475	99.822	nn	np	nn	--	--	nn	--	np	np	nn	nn	nn	nn	--	nn	nn	np	np	np	np	nn	np	nn	np	nn	np	nn	np	nn	nn	--	nn	nn	np	np	np	--	nn	nn	nn	--	nn	nn	nn	np	np
995	LG4	M03762	100.936	hk	hk	hk	hh	hk	hh	hk	hk	h-	--	hh	hk	hh	--	hh	hk	hk	--	hk	k-	--	hk	hh	hk	hh	hk	hk	hk	hk	k-	--	hk	hk	hk	k-	hk	hk	hk	--	--	hk	hh	hh	hk	hk	hk
996	LG4	M12323	101.096	lm	ll	lm	ll	lm	ll	lm	lm	ll	ll	ll	lm	ll	--	ll	ll	lm	ll	ll	lm	ll	ll	ll	lm	ll	lm	lm	ll	lm	lm	ll	lm	lm	lm	lm	lm	ll	lm	--	ll	ll	ll	ll	lm	lm	ll
997	LG4	M64986	101.692	nn	np	np	np	np	nn	np	nn	np	nn	nn	nn	nn	--	nn	--	np	--	np	np	nn	np	nn	np	nn	nn	nn	np	nn	np	nn	nn	nn	np	nn	np	--	nn	nn	--	np	nn	nn	nn	np	np
998	LG4	M64386	102.598	lm	ll	lm	ll	lm	ll	lm	lm	ll	ll	ll	lm	ll	lm	ll	ll	lm	ll	ll	lm	ll	ll	ll	lm	ll	lm	lm	ll	lm	lm	ll	lm	ll	lm	lm	lm	ll	lm	ll	ll	ll	ll	ll	lm	lm	ll
999	LG4	M72084	102.944	nn	np	--	nn	nn	np	nn	nn	nn	np	np	np	np	nn	np	np	nn	--	nn	nn	np	nn	np	nn	nn	np	np	nn	np	--	--	np	np	nn	nn	nn	--	np	np	np	nn	np	np	np	nn	nn
1000	LG4	M62154	103.43	lm	ll	ll	lm	ll	lm	ll	ll	lm	lm	lm	ll	lm	ll	lm	lm	ll	--	lm	ll	lm	lm	lm	ll	lm	ll	ll	lm	ll	ll	lm	ll	lm	ll	ll	ll	lm	ll	lm	lm	lm	lm	lm	ll	ll	lm
1001	LG4	M06825	103.781	nn	np	np	nn	np	nn	np	np	np	nn	nn	nn	nn	nn	nn	nn	np	np	np	np	nn	np	nn	np	nn	nn	nn	--	nn	np	nn	nn	nn	np	nn	np	np	nn	nn	nn	np	nn	nn	nn	np	np
1002	LG4	M62153	104.057	lm	ll	lm	ll	lm	ll	lm	lm	ll	ll	ll	lm	ll	lm	ll	ll	--	--	ll	lm	ll	ll	ll	lm	ll	lm	lm	ll	lm	lm	ll	lm	ll	lm	lm	lm	ll	lm	ll	ll	ll	ll	ll	lm	lm	ll
1003	LG4	M05708	104.17	nn	np	np	nn	np	nn	np	np	np	nn	nn	nn	nn	nn	nn	nn	np	--	np	np	nn	np	nn	np	nn	nn	nn	--	nn	np	nn	nn	nn	np	nn	np	--	nn	nn	nn	np	nn	nn	nn	np	np
1004	LG4	M68132	104.211	lm	ll	lm	ll	lm	ll	lm	lm	ll	ll	ll	lm	ll	lm	ll	ll	lm	ll	ll	lm	ll	ll	ll	lm	ll	lm	lm	ll	lm	lm	--	lm	--	lm	lm	lm	ll	lm	ll	ll	ll	ll	ll	lm	lm	ll
1005	LG4	M69516	104.788	nn	np	--	nn	np	nn	np	--	np	--	--	nn	nn	--	nn	--	np	--	np	np	--	np	--	np	np	nn	nn	np	nn	--	--	nn	--	--	nn	np	--	nn	nn	--	--	nn	nn	nn	np	np
1006	LG4	M54916	104.952	lm	ll	ll	lm	ll	lm	ll	ll	lm	--	lm	ll	lm	ll	lm	lm	ll	--	lm	ll	lm	lm	lm	ll	lm	ll	ll	lm	ll	ll	--	ll	lm	ll	ll	ll	lm	ll	--	lm	lm	lm	lm	ll	ll	lm
1007	LG4	M73331	105.309	nn	np	np	nn	np	nn	np	--	np	--	nn	nn	nn	--	nn	nn	np	--	np	np	nn	np	--	np	np	nn	nn	np	nn	--	--	nn	--	np	nn	np	--	nn	nn	nn	np	nn	nn	nn	np	np
1008	LG4	M08907	105.327	lm	ll	ll	lm	ll	lm	ll	ll	lm	lm	lm	ll	lm	ll	lm	lm	ll	lm	lm	ll	lm	lm	lm	ll	lm	ll	ll	lm	ll	ll	lm	ll	lm	ll	ll	ll	lm	ll	lm	lm	lm	lm	ll	ll	ll	lm
1009	LG4	M64385	105.515	lm	ll	ll	lm	ll	lm	ll	ll	lm	lm	lm	ll	lm	ll	lm	lm	ll	lm	lm	ll	lm	lm	lm	ll	lm	ll	ll	lm	ll	ll	ll	ll	lm	ll	ll	ll	lm	ll	lm	lm	lm	lm	lm	ll	ll	lm
1010	LG4	M71763	105.606	nn	np	nn	nn	nn	np	nn	nn	nn	--	np	np	np	--	np	np	nn	--	nn	nn	np	nn	np	nn	nn	np	np	nn	np	--	np	np	np	nn	np	nn	--	np	np	np	nn	np	np	np	nn	nn
1011	LG4	M53214	106.118	lm	ll	lm	ll	lm	ll	lm	lm	ll	ll	ll	lm	ll	lm	ll	ll	lm	--	ll	lm	ll	ll	ll	lm	ll	lm	lm	ll	lm	lm	ll	lm	ll	lm	lm	lm	ll	lm	ll	--	ll	ll	ll	lm	lm	ll
1012	LG4	M65614	106.45	nn	np	np	nn	np	nn	np	np	np	nn	nn	nn	nn	nn	nn	nn	np	nn	np	np	nn	np	nn	np	np	nn	nn	np	nn	np	nn	nn	nn	np	nn	np	np	nn	nn	nn	np	nn	nn	nn	np	np
1013	LG4	M04385	106.825	lm	ll	ll	lm	ll	lm	ll	ll	lm	lm	lm	ll	lm	ll	lm	lm	ll	lm	lm	ll	lm	lm	lm	ll	lm	ll	ll	lm	ll	ll	lm	ll	--	ll	ll	ll	--	ll	lm	lm	lm	lm	ll	ll	ll	lm
1014	LG4	M09416	107.376	lm	ll	ll	lm	ll	lm	ll	ll	lm	--	lm	ll	lm	ll	lm	lm	ll	lm	lm	ll	lm	lm	lm	ll	lm	ll	ll	lm	ll	ll	ll	ll	lm	ll	ll	ll	lm	ll	lm	lm	--	lm	ll	ll	ll	lm
1015	LG4	M00117	107.423	lm	ll	ll	lm	ll	lm	ll	ll	lm	lm	lm	ll	lm	ll	lm	lm	ll	lm	lm	ll	lm	lm	lm	ll	lm	ll	ll	lm	ll	ll	ll	ll	lm	ll	ll	ll	lm	ll	lm	lm	--	lm	ll	ll	ll	lm
1016	LG4	M08055	107.887	nn	np	nn	nn	nn	np	nn	nn	nn	np	np	np	np	np	np	np	nn	nn	nn	nn	np	nn	np	nn	nn	np	np	nn	np	nn	np	np	np	nn	np	nn	nn	np	np	np	nn	np	np	np	nn	nn
1017	LG4	M07181	108.515	nn	np	nn	nn	nn	np	nn	nn	nn	np	np	np	np	np	np	np	nn	nn	nn	nn	np	nn	np	nn	nn	np	np	nn	np	nn	np	np	np	nn	np	nn	nn	np	np	np	nn	np	np	np	nn	nn
1018	LG4	M04743	109.157	lm	ll	ll	--	ll	lm	ll	ll	lm	--	lm	ll	lm	--	lm	lm	ll	lm	lm	ll	--	lm	lm	ll	lm	ll	ll	lm	ll	ll	--	ll	--	ll	ll	ll	lm	ll	lm	lm	lm	lm	ll	--	ll	lm
1019	LG4	M11274	109.688	nn	np	nn	nn	nn	np	nn	nn	nn	np	np	np	np	nn	np	np	nn	nn	nn	nn	np	nn	np	nn	nn	np	np	nn	np	nn	--	np	np	nn	np	nn	nn	np	np	np	nn	np	np	np	nn	nn
1020	LG4	M53280	110.863	lm	ll	lm	ll	lm	ll	lm	lm	ll	ll	ll	lm	ll	lm	ll	ll	--	ll	ll	lm	ll	ll	ll	lm	ll	lm	lm	ll	lm	--	ll	lm	ll	lm	lm	lm	ll	lm	ll	ll	ll	ll	ll	lm	--	ll
1021	LG4	M05178	111.67	nn	np	nn	nn	nn	np	nn	nn	nn	np	np	np	np	--	np	np	nn	nn	nn	nn	np	nn	np	nn	nn	np	np	nn	np	nn	np	np	np	nn	np	nn	nn	np	np	np	nn	np	np	np	nn	nn
1022	LG4	M01670	112.583	lm	ll	--	lm	lm	ll	--	lm	ll	--	ll	lm	ll	--	ll	--	--	--	ll	lm	ll	ll	ll	lm	ll	lm	lm	ll	lm	--	--	lm	--	lm	--	ll	--	lm	ll	--	ll	ll	--	lm	--	ll
1023	LG4	M71893	112.666	nn	np	np	np	np	nn	np	nn	np	--	nn	nn	nn	np	nn	nn	nn	np	np	np	nn	np	nn	np	nn	nn	nn	np	nn	np	--	nn	nn	np	nn	np	--	nn	nn	--	--	nn	--	nn	np	np
1024	LG4	M00193	113.233	lm	ll	--	lm	lm	ll	--	lm	ll	--	ll	lm	ll	--	ll	--	--	--	ll	lm	ll	ll	ll	lm	ll	lm	lm	ll	lm	--	--	lm	--	lm	--	ll	--	lm	ll	--	ll	ll	--	lm	--	ll
1025	LG4	M64332	114.718	nn	np	--	nn	--	--	np	--	np	--	nn	nn	--	--	nn	nn	--	--	np	--	nn	np	nn	np	np	nn	--	np	nn	--	--	--	--	nn	nn	np	--	--	nn	--	np	nn	nn	nn	--	np
1026	LG4	M03027	115.312	lm	ll	lm	ll	lm	ll	ll	--	ll	ll	ll	--	ll	lm	ll	ll	--	--	ll	lm	ll	ll	ll	lm	ll	lm	ll	ll	lm	--	ll	lm	ll	lm	lm	--	ll	ll	ll	ll	ll	ll	ll	--	lm	ll
1027	LG4	M53277	119.438	lm	ll	lm	ll	lm	--	lm	lm	ll	ll	--	lm	--	lm	ll	ll	lm	--	lm	lm	ll	ll	ll	lm	ll	lm	lm	ll	lm	lm	ll	lm	ll	lm	lm	lm	ll	lm	lm	--	ll	lm	ll	lm	lm	lm
1028	LG4	M69520	123.116	nn	np	--	nn	nn	--	nn	nn	nn	--	nn	np	nn	--	np	--	nn	--	nn	nn	--	nn	--	nn	nn	np	np	nn	np	--	--	nn	--	nn	np	nn	nn	np	np	--	--	np	np	np	nn	nn
1029	LG4	M01985	129.336	lm	ll	lm	lm	lm	--	--	lm	lm	--	ll	--	lm	ll	lm	lm	--	lm	lm	lm	lm	lm	lm	lm	lm	ll	ll	lm	ll	ll	ll	ll	ll	--	ll	ll	lm	ll	lm	lm	lm	lm	lm	ll	lm	lm
1030	LG4	M00693	129.358	lm	ll	lm	lm	lm	--	--	lm	lm	--	ll	--	lm	ll	lm	lm	lm	lm	lm	lm	lm	lm	lm	lm	lm	ll	ll	lm	ll	ll	ll	ll	ll	--	ll	ll	lm	ll	lm	lm	lm	lm	lm	ll	lm	lm
1031	LG4	M12546	136.745	lm	ll	lm	lm	lm	lm	lm	lm	lm	--	lm	ll	lm	--	lm	lm	lm	--	lm	lm	--	lm	lm	lm	lm	ll	ll	lm	ll	--	lm	ll	--	--	ll	lm	lm	ll	lm	lm	lm	lm	--	ll	lm	lm
1032	LG5	M54999	0	lm	ll	lm	lm	lm	lm	lm	--	lm	ll	ll	ll	ll	lm	lm	lm	lm	lm	lm	lm	lm	lm	lm	lm	ll	lm	lm	lm	lm	ll	lm	lm	lm	lm	lm	lm	lm	lm	ll	lm	lm	lm	ll	lm	lm	lm
1033	LG5	M55000	0.727	lm	ll	lm	lm	lm	lm	lm	--	lm	ll	ll	ll	ll	lm	lm	lm	lm	lm	lm	lm	lm	lm	lm	lm	ll	lm	lm	lm	lm	ll	lm	lm	lm	lm	lm	lm	lm	lm	ll	lm	lm	lm	ll	lm	lm	lm
1034	LG5	M61190	3.073	hk	hk	hh	hk	hk	hh	hk	hk	hk	kk	kk	hk	hk	hk	hk	hh	hk	hh	hk	hk	hk	hk	hk	hh	hk	hh	hk	hk	hk	--	hk	hk	hk	hk	hh	h-	hh	hk	kk	hk	hh	hk	hk	hk	hh	hk
1035	LG5	M00845	4.101	lm	ll	lm	lm	lm	lm	lm	lm	lm	ll	ll	ll	ll	lm	lm	lm	lm	lm	lm	lm	lm	lm	lm	lm	ll	lm	--	lm	lm	ll	lm	lm	lm	lm	lm	lm	lm	lm	ll	lm	lm	lm	ll	lm	lm	ll
1036	LG5	M64672	8.891	hk	hk	kk	hk	hk	kk	hk	hk	hk	hh	hh	hh	hh	hk	hk	kk	hk	--	hk	hk	hk	hk	hk	kk	hh	kk	hk	hk	hk	--	hk	hk	hk	hk	kk	hk	kk	hk	hh	hk	kk	hk	hh	kk	kk	hh
1037	LG5	M64670	9.87	hk	hk	kk	hh	hk	kk	hk	hk	hk	--	hh	hh	hh	hk	hk	kk	hk	--	hk	hk	hk	hk	hk	kk	hh	kk	hk	hk	hk	--	hk	hk	hk	hk	kk	hk	kk	hk	hh	h-	kk	hk	hh	kk	kk	hh
1038	LG5	M66819	10.975	lm	ll	lm	ll	lm	lm	lm	ll	lm	--	lm	ll	ll	--	lm	ll	lm	--	ll	lm	lm	ll	lm	lm	ll	lm	lm	lm	ll	ll	lm	lm	ll	lm	lm	lm	--	ll	lm	lm	lm	lm	lm	lm	lm	lm
1039	LG5	M67905	11.22	nn	np	nn	np	np	np	np	nn	np	--	np	nn	nn	--	np	nn	np	--	nn	nn	nn	nn	np	np	nn	np	nn	--	nn	nn	--	np	--	nn	np	np	--	nn	nn	--	np	nn	--	--	nn	np
1040	LG5	M67912	11.805	nn	np	nn	np	np	np	np	nn	np	--	np	nn	nn	--	np	nn	np	--	nn	nn	nn	nn	np	np	nn	np	nn	--	nn	nn	--	np	--	nn	np	np	--	nn	nn	--	nn	nn	--	--	nn	np
1041	LG5	M67908	11.926	nn	np	nn	np	np	np	np	nn	np	--	np	nn	nn	--	np	nn	np	--	nn	nn	nn	nn	np	np	nn	np	nn	--	nn	nn	--	np	--	nn	np	np	--	nn	nn	--	nn	nn	--	--	nn	np
1042	LG5	M67911	13.126	nn	np	nn	nn	np	np	np	nn	np	--	np	nn	nn	--	np	nn	np	--	nn	nn	nn	nn	np	np	nn	np	nn	--	nn	nn	--	np	--	nn	np	np	--	nn	nn	--	nn	nn	--	--	nn	np
1043	LG5	M67910	13.129	nn	np	nn	nn	np	np	np	nn	np	--	np	nn	nn	--	np	nn	np	--	nn	nn	nn	nn	np	np	nn	np	nn	--	nn	nn	--	np	--	nn	np	np	--	nn	nn	--	nn	nn	--	--	nn	np
1044	LG5	M66822	15.389	nn	np	nn	nn	np	nn	np	nn	np	--	np	nn	nn	nn	np	nn	np	--	nn	nn	nn	nn	np	np	nn	np	nn	np	nn	nn	nn	np	nn	nn	nn	np	nn	nn	nn	np	nn	nn	np	np	nn	np
1045	LG5	M04136	18.229	nn	np	np	np	nn	nn	nn	np	nn	np	nn	np	np	nn	nn	np	nn	np	np	np	np	np	nn	nn	np	nn	np	nn	np	np	--	nn	np	np	nn	nn	np	np	np	nn	np	np	nn	nn	np	nn
1046	LG5	M00236	18.354	nn	np	np	np	nn	nn	nn	np	nn	np	nn	np	np	nn	nn	np	nn	np	np	np	np	np	nn	nn	np	nn	np	nn	np	np	--	nn	np	np	nn	nn	np	np	np	nn	np	np	nn	nn	np	nn
1047	LG5	M11181	18.662	lm	ll	lm	ll	lm	lm	ll	ll	ll	--	ll	ll	ll	--	ll	lm	ll	--	ll	lm	lm	lm	lm	ll	ll	--	lm	ll	ll	--	lm	--	ll	ll	lm	lm	--	lm	ll	--	lm	lm	--	lm	lm	ll
1048	LG5	M54409	19.798	lm	ll	ll	lm	ll	ll	lm	lm	lm	lm	lm	lm	lm	ll	lm	ll	lm	--	lm	ll	ll	lm	ll	lm	lm	ll	ll	lm	lm	lm	ll	lm	lm	ll	ll	ll	ll	lm	ll	lm	ll	ll	lm	ll	ll	lm
1049	LG5	M10371	21.85	lm	ll	lm	ll	lm	lm	ll	ll	ll	--	ll	ll	ll	--	ll	lm	ll	--	ll	lm	lm	lm	lm	ll	ll	--	lm	ll	ll	ll	lm	--	ll	ll	lm	lm	--	lm	ll	--	lm	lm	--	lm	lm	ll
1050	LG5	M00151	21.976	lm	ll	lm	ll	lm	lm	ll	ll	ll	--	ll	ll	ll	--	ll	lm	ll	--	ll	lm	lm	lm	lm	ll	ll	--	lm	ll	ll	ll	lm	--	ll	ll	lm	lm	--	lm	ll	--	lm	lm	--	lm	lm	ll
1051	LG5	M10994	22.704	lm	ll	lm	--	lm	lm	ll	ll	ll	ll	ll	ll	ll	lm	ll	lm	ll	lm	ll	lm	lm	--	lm	ll	ll	--	lm	ll	ll	ll	lm	ll	ll	lm	lm	lm	--	lm	ll	ll	lm	--	ll	lm	lm	ll
1052	LG5	M71162	23.067	hk	hk	--	hk	hh	hh	--	--	hk	--	hk	--	kk	--	hk	hk	hk	--	kk	hk	hk	k-	hh	hk	kk	hh	hk	hk	kk	kk	hk	hk	kk	hk	hh	hh	hh	hk	kk	k-	hh	hk	hk	hh	hk	hk
1053	LG5	M07541	23.253	hk	hk	kk	hk	kk	kk	hk	--	hk	--	hk	hh	hh	--	hk	--	hk	--	hk	hk	hk	hk	kk	hk	hh	kk	hk	hk	hh	hh	hk	hk	hh	hk	kk	kk	--	hk	hh	h-	--	hk	kk	kk	hk	hk
1054	LG5	M58204	23.952	lm	ll	lm	lm	lm	lm	ll	ll	ll	--	ll	ll	ll	lm	ll	lm	--	lm	ll	lm	lm	lm	lm	ll	ll	lm	lm	ll	ll	ll	lm	ll	ll	lm	lm	lm	--	lm	ll	ll	lm	lm	ll	lm	lm	ll
1055	LG5	cms13324	25.48	lm	ll	lm	lm	lm	lm	ll	ll	ll	ll	ll	ll	ll	lm	ll	lm	ll	lm	ll	lm	lm	lm	lm	ll	ll	lm	lm	ll	ll	ll	lm	ll	ll	lm	lm	lm	lm	lm	ll	ll	lm	lm	ll	lm	lm	ll
1056	LG5	M71161	27.129	lm	ll	--	ll	lm	lm	--	--	ll	--	ll	--	ll	--	ll	lm	ll	--	ll	lm	lm	--	lm	ll	ll	lm	lm	ll	ll	ll	lm	ll	ll	lm	lm	lm	--	lm	ll	ll	lm	lm	ll	lm	lm	ll
1057	LG5	M67907	28.393	lm	ll	lm	ll	lm	lm	ll	ll	ll	--	ll	ll	ll	--	ll	lm	ll	--	ll	ll	lm	ll	lm	ll	ll	lm	lm	ll	ll	ll	--	ll	--	lm	--	lm	--	ll	lm	--	lm	lm	--	lm	lm	ll
1058	LG5	M67906	28.92	lm	ll	lm	ll	lm	lm	ll	ll	ll	--	ll	ll	ll	--	ll	lm	ll	--	ll	ll	lm	ll	lm	ll	ll	lm	lm	ll	ll	ll	--	ll	--	lm	--	lm	--	ll	lm	--	lm	lm	--	--	lm	ll
1059	LG5	M02190	29.502	nn	np	np	nn	np	np	np	nn	np	nn	np	--	nn	--	np	nn	np	np	nn	nn	nn	nn	np	np	nn	np	nn	np	nn	--	--	np	--	nn	nn	np	nn	nn	nn	np	np	nn	np	np	nn	np
1060	LG5	M06734	29.625	nn	np	np	nn	np	np	np	nn	--	nn	np	nn	nn	nn	--	nn	--	np	nn	nn	nn	nn	np	np	nn	np	nn	np	nn	nn	nn	np	nn	nn	--	np	nn	nn	nn	np	np	nn	--	np	nn	np
1061	LG5	M53725	29.996	nn	np	nn	--	nn	nn	--	np	np	nn	np	np	np	nn	--	nn	--	nn	nn	nn	nn	np	nn	np	--	nn	nn	np	nn	nn	nn	np	--	nn	nn	nn	nn	np	nn	np	nn	nn	np	nn	nn	nn
1062	LG5	M06216	30.136	nn	np	nn	np	nn	nn	np	np	np	np	np	np	np	np	--	np	np	--	np	--	np	np	nn	np	np	nn	np	np	np	np	np	np	np	np	nn	nn	np	--	np	np	nn	np	np	nn	np	np
1063	LG5	cms13387	31.389	hk	hk	hh	hk	hh	hh	hk	kk	hk	kk	hk	kk	kk	hh	hk	hk	hk	hk	kk	hk	hk	kk	hh	hk	hk	hh	--	hk	kk	kk	hk	hk	kk	hk	hh	hh	hk	kk	hk	kk	hk	--	hk	hh	--	hk
1064	LG5	M10335	32.026	lm	ll	lm	ll	lm	lm	ll	ll	ll	--	ll	ll	ll	--	ll	lm	ll	--	ll	--	--	ll	ll	ll	ll	lm	ll	ll	ll	--	--	ll	ll	lm	lm	lm	--	ll	lm	ll	ll	ll	ll	--	lm	ll
1065	LG5	M63951	34.837	hk	hk	kk	k-	hk	hk	hk	hk	hk	hh	hk	hk	hk	hk	k-	hk	kk	--	hh	k-	hk	hk	hk	kk	kk	hk	h-	hk	h-	hk	hk	h-	hk	hh	h-	hk	hh	kk	hk	hk	hk	k-	--	hh	hk	--
1066	LG5	M08937	34.998	lm	ll	ll	lm	ll	ll	lm	lm	lm	lm	lm	lm	lm	ll	lm	ll	lm	--	lm	ll	ll	lm	ll	lm	lm	ll	ll	lm	lm	lm	ll	lm	lm	ll	ll	ll	--	lm	ll	lm	ll	ll	lm	ll	ll	lm
1067	LG5	M00739	36.208	lm	ll	lm	ll	lm	lm	ll	ll	ll	lm	ll	ll	ll	lm	ll	lm	--	--	lm	lm	lm	ll	lm	ll	ll	lm	lm	ll	lm	ll	--	ll	ll	lm	ll	--	--	ll	--	--	lm	lm	ll	lm	lm	ll
1068	LG5	M71429	36.668	lm	ll	--	ll	--	lm	--	--	ll	--	ll	--	--	lm	ll	lm	ll	--	lm	ll	ll	ll	ll	ll	ll	ll	lm	ll	ll	--	ll	ll	ll	lm	lm	ll	ll	ll	lm	--	lm	ll	ll	lm	--	lm
1069	LG5	M71430	36.93	lm	ll	--	ll	--	lm	--	--	ll	--	ll	--	--	lm	ll	lm	ll	--	lm	ll	ll	ll	ll	ll	ll	ll	lm	ll	ll	--	ll	ll	ll	lm	lm	ll	ll	--	lm	--	lm	ll	ll	lm	--	lm
1070	LG5	M06230	37.768	lm	ll	ll	lm	--	lm	lm	ll	lm	--	--	ll	lm	lm	lm	ll	lm	ll	--	--	--	--	lm	lm	lm	ll	ll	lm	lm	ll	lm	lm	lm	ll	lm	--	--	lm	ll	lm	ll	ll	lm	ll	lm	ll
1071	LG5	M57343	37.795	nn	np	--	nn	np	np	np	nn	np	--	np	--	nn	--	np	nn	--	--	nn	nn	nn	nn	--	np	np	nn	np	np	nn	--	--	np	nn	--	np	np	nn	nn	nn	--	nn	nn	np	--	nn	np
1072	LG5	M01221	37.875	nn	np	nn	nn	np	np	np	nn	np	nn	np	nn	nn	np	np	nn	np	--	nn	nn	nn	nn	np	np	np	np	np	np	nn	nn	nn	np	nn	nn	np	np	--	nn	nn	np	nn	nn	np	np	nn	np
1073	LG5	M02305	37.889	nn	np	nn	np	np	np	np	nn	np	--	np	nn	nn	np	np	nn	np	nn	nn	nn	nn	nn	np	np	np	np	--	np	nn	nn	nn	np	nn	nn	np	np	nn	nn	nn	np	nn	nn	np	np	nn	np
1074	LG5	M02333	37.892	lm	ll	ll	lm	ll	ll	ll	lm	--	--	--	lm	lm	ll	lm	--	lm	--	lm	lm	--	lm	ll	--	lm	ll	ll	lm	lm	lm	lm	lm	lm	--	ll	ll	ll	lm	lm	--	lm	--	lm	ll	lm	--
1075	LG5	M09108	37.893	lm	ll	ll	lm	ll	ll	ll	lm	--	--	--	lm	lm	ll	lm	--	lm	--	lm	lm	--	lm	ll	--	lm	ll	ll	lm	lm	lm	lm	lm	lm	--	ll	ll	--	lm	lm	--	lm	--	lm	ll	lm	--
1076	LG5	M00296	37.915	lm	ll	ll	lm	ll	ll	ll	lm	--	--	--	lm	lm	ll	lm	lm	--	--	lm	lm	--	lm	ll	--	lm	ll	ll	lm	lm	lm	lm	lm	lm	--	ll	ll	ll	lm	lm	--	lm	--	lm	ll	lm	--
1077	LG5	M62961	37.981	nn	np	np	nn	nn	nn	nn	np	nn	np	nn	np	np	nn	nn	--	--	np	np	np	np	np	nn	nn	nn	nn	nn	nn	np	np	--	nn	np	np	nn	nn	np	np	np	np	np	np	nn	nn	np	nn
1078	LG5	M07305	38.032	nn	np	np	nn	nn	nn	nn	np	nn	np	nn	np	np	nn	nn	np	nn	--	np	np	np	np	nn	nn	nn	nn	nn	nn	--	--	--	nn	np	np	nn	nn	np	np	np	nn	np	np	nn	nn	np	nn
1079	LG5	M09587	38.065	nn	np	nn	np	nn	np	np	nn	np	nn	np	nn	nn	np	np	nn	np	nn	nn	nn	nn	nn	np	np	np	np	np	np	nn	--	nn	np	nn	nn	--	np	nn	--	nn	np	nn	nn	np	--	nn	np
1080	LG5	M69811	38.519	nn	np	nn	nn	nn	np	np	nn	nn	nn	np	nn	nn	np	np	nn	np	nn	nn	nn	nn	nn	np	np	--	np	np	--	nn	nn	nn	np	nn	nn	--	--	nn	np	nn	np	nn	nn	np	np	nn	np
1081	LG5	M05688	38.528	nn	np	np	nn	np	nn	nn	np	nn	np	nn	np	np	nn	nn	np	nn	--	np	np	np	np	nn	nn	nn	nn	nn	nn	np	np	np	nn	nn	np	nn	nn	np	nn	np	nn	np	np	nn	nn	np	nn
1082	LG5	M52062	38.538	nn	np	nn	np	nn	--	np	nn	--	nn	np	nn	nn	nn	np	nn	np	--	nn	nn	nn	nn	np	np	np	--	np	np	nn	nn	nn	np	nn	nn	--	np	nn	np	nn	np	nn	nn	np	np	nn	np
1083	LG5	M00028	38.782	nn	np	nn	nn	nn	np	np	nn	nn	nn	np	nn	nn	--	np	nn	np	--	nn	nn	nn	--	np	--	np	np	np	np	nn	nn	--	np	nn	nn	np	np	nn	np	nn	--	nn	nn	np	np	nn	np
1084	LG5	M67732	38.811	lm	ll	lm	lm	lm	lm	ll	ll	ll	ll	ll	ll	ll	lm	ll	lm	--	lm	lm	lm	lm	ll	lm	ll	ll	lm	lm	ll	lm	--	lm	ll	ll	lm	lm	lm	--	ll	lm	ll	lm	lm	ll	lm	lm	ll
1085	LG5	M54936	39.541	lm	ll	ll	--	--	lm	ll	ll	ll	ll	ll	ll	ll	lm	ll	lm	ll	--	lm	lm	ll	ll	--	ll	ll	lm	--	ll	lm	--	lm	ll	--	--	lm	--	lm	ll	lm	ll	lm	lm	--	lm	lm	--
1086	LG5	M63933	40.255	lm	ll	lm	ll	lm	lm	ll	ll	ll	--	ll	ll	ll	lm	ll	lm	ll	--	lm	lm	lm	ll	lm	ll	ll	lm	lm	ll	--	--	--	ll	ll	lm	lm	lm	--	ll	lm	ll	--	--	--	lm	lm	ll
1087	LG5	M68589	40.927	lm	ll	lm	ll	lm	lm	ll	ll	ll	ll	ll	ll	ll	--	ll	--	ll	lm	lm	lm	lm	ll	lm	ll	ll	lm	lm	ll	lm	ll	--	ll	ll	lm	lm	lm	lm	ll	lm	ll	lm	--	ll	lm	lm	ll
1088	LG5	M68613	41.819	lm	ll	lm	ll	lm	--	ll	ll	ll	ll	ll	ll	ll	lm	ll	lm	ll	--	lm	lm	lm	ll	lm	ll	ll	lm	lm	ll	lm	ll	--	ll	--	lm	lm	--	--	ll	lm	--	lm	lm	ll	lm	--	ll
1089	LG5	M01362	42.247	hk	hk	hk	hh	hk	hk	kk	kk	kk	hk	kk	kk	hk	hk	k-	hk	--	--	hk	hk	hk	kk	hk	hk	kk	hk	hk	hk	hk	kk	hk	k-	kk	hk	hk	hk	hk	hk	hk	kk	hk	hk	hk	hk	hk	hk
1090	LG5	M04193	42.299	hk	hk	hk	hh	hk	hk	kk	kk	kk	hk	kk	kk	hk	hk	k-	hk	kk	--	hk	hk	hk	kk	hk	hk	kk	hk	hk	hk	hk	kk	hk	kk	kk	hk	hk	hk	hk	hk	hk	kk	hk	hk	k-	hk	hk	hk
1091	LG5	M09483	42.737	lm	ll	ll	lm	ll	ll	lm	lm	lm	--	lm	lm	lm	ll	lm	ll	lm	ll	ll	ll	ll	lm	ll	lm	lm	ll	ll	lm	ll	lm	ll	lm	lm	ll	ll	ll	ll	lm	ll	--	ll	ll	lm	ll	ll	lm
1092	LG5	M02263	42.967	hk	hk	hk	hh	hk	hk	kk	kk	kk	hk	kk	kk	hk	hk	k-	hk	--	--	hk	--	hk	kk	hk	hk	kk	hk	--	hk	hk	kk	hk	kk	kk	hk	hk	hk	hk	k-	hk	kk	hk	hk	--	hk	hk	hk
1093	LG5	M06978	43.209	hk	hk	hk	kk	hk	hk	hh	hh	hh	hk	hh	hh	hk	hk	h-	hk	hh	--	hk	hk	hk	hh	hk	hk	hh	hk	hk	hk	hk	hh	hk	hh	hh	hk	hk	hk	hk	--	hk	hh	hk	hk	h-	hk	hk	hk
1094	LG5	M04536	43.53	lm	ll	lm	ll	lm	lm	ll	ll	ll	lm	ll	ll	ll	lm	ll	lm	ll	--	lm	lm	lm	ll	lm	ll	ll	lm	lm	ll	lm	ll	lm	ll	ll	ll	lm	lm	lm	ll	lm	ll	lm	lm	ll	lm	lm	ll
1095	LG5	M06057	43.954	lm	ll	lm	lm	lm	lm	ll	ll	ll	lm	ll	ll	ll	lm	ll	lm	ll	lm	lm	lm	lm	ll	lm	ll	ll	lm	lm	ll	lm	ll	lm	ll	ll	lm	lm	lm	lm	ll	lm	ll	lm	lm	ll	lm	lm	ll
1096	LG5	M67725	44.722	lm	ll	ll	--	ll	ll	lm	--	lm	--	lm	lm	lm	ll	lm	ll	lm	ll	ll	ll	ll	lm	ll	--	lm	ll	ll	lm	ll	--	ll	lm	ll	ll	ll	ll	ll	lm	ll	lm	ll	ll	lm	ll	ll	lm
1097	LG5	M07173	45.508	lm	ll	ll	lm	ll	ll	lm	lm	lm	--	lm	lm	lm	ll	lm	ll	lm	ll	ll	ll	ll	lm	ll	lm	lm	ll	ll	lm	ll	lm	ll	lm	lm	ll	ll	ll	ll	lm	ll	lm	ll	ll	lm	ll	ll	lm
1098	LG5	M68612	45.956	hk	hk	kk	hk	kk	kk	hh	hk	hk	hk	hh	hk	hk	hk	hh	kk	hh	--	kk	kk	kk	hk	hk	hh	hh	hk	hk	hh	kk	hk	--	hh	--	kk	hk	--	--	hh	kk	--	kk	kk	hh	hk	--	hh
1099	LG5	M73346	48.151	lm	ll	ll	lm	ll	ll	lm	lm	--	ll	ll	lm	lm	ll	--	ll	lm	--	ll	ll	ll	lm	ll	lm	lm	ll	ll	lm	ll	ll	ll	lm	lm	ll	ll	ll	ll	--	ll	--	ll	ll	ll	ll	ll	ll
1100	LG5	M72473	48.224	lm	ll	ll	lm	ll	ll	lm	lm	--	ll	ll	lm	lm	ll	--	ll	lm	--	ll	ll	ll	lm	ll	lm	lm	ll	ll	lm	ll	ll	ll	lm	lm	ll	ll	ll	ll	--	ll	--	ll	ll	ll	ll	ll	ll
1101	LG5	M72472	48.235	lm	ll	ll	lm	ll	ll	lm	lm	--	ll	ll	lm	lm	ll	--	ll	lm	--	ll	ll	ll	lm	ll	lm	lm	ll	ll	lm	ll	ll	ll	lm	lm	ll	ll	ll	ll	--	ll	--	ll	ll	ll	ll	ll	ll
1102	LG5	M72474	48.486	lm	ll	ll	lm	ll	ll	lm	lm	--	ll	ll	lm	lm	ll	--	ll	lm	--	ll	ll	ll	lm	ll	lm	lm	ll	ll	lm	ll	ll	ll	lm	lm	ll	ll	ll	ll	--	ll	--	ll	ll	ll	ll	ll	ll
1103	LG5	M64744	49.539	lm	ll	ll	lm	ll	ll	lm	lm	lm	--	lm	--	lm	ll	lm	ll	lm	ll	ll	ll	ll	lm	ll	lm	lm	ll	ll	lm	ll	ll	--	lm	lm	ll	ll	ll	ll	lm	ll	lm	ll	ll	--	ll	ll	ll
1104	LG5	M02769	49.938	lm	ll	ll	lm	ll	ll	lm	lm	lm	ll	lm	lm	lm	ll	lm	ll	lm	--	ll	ll	ll	lm	ll	lm	lm	ll	ll	lm	ll	ll	--	lm	lm	ll	ll	ll	--	lm	ll	lm	ll	ll	lm	ll	ll	ll
1105	LG5	M11203	51.285	lm	ll	lm	lm	lm	lm	ll	ll	ll	lm	ll	ll	ll	lm	ll	lm	ll	--	--	--	--	ll	lm	ll	ll	lm	--	ll	lm	lm	lm	ll	ll	lm	lm	--	lm	ll	lm	ll	lm	lm	ll	lm	lm	lm
1106	LG5	M50359	51.931	lm	ll	lm	ll	lm	lm	ll	ll	ll	--	lm	ll	ll	lm	ll	lm	ll	lm	lm	lm	lm	ll	lm	ll	ll	lm	lm	ll	lm	--	--	ll	ll	lm	lm	lm	lm	ll	lm	ll	lm	lm	ll	lm	--	lm
1107	LG5	M68410	52.971	lm	ll	lm	ll	lm	lm	ll	--	ll	--	lm	ll	ll	lm	ll	lm	ll	--	lm	lm	lm	ll	lm	ll	ll	lm	lm	ll	--	--	lm	ll	ll	lm	lm	lm	lm	ll	lm	--	lm	lm	ll	lm	lm	lm
1108	LG5	M05647	53.668	lm	ll	lm	ll	lm	lm	ll	ll	ll	lm	lm	ll	ll	lm	ll	lm	ll	ll	lm	lm	lm	ll	lm	ll	ll	lm	lm	ll	lm	--	lm	ll	ll	lm	lm	lm	lm	ll	lm	ll	lm	lm	ll	lm	lm	lm
1109	LG5	M00477	53.999	lm	ll	lm	ll	lm	lm	ll	ll	ll	lm	--	ll	ll	--	ll	lm	ll	lm	lm	lm	lm	ll	lm	ll	ll	lm	--	ll	lm	lm	--	ll	--	lm	lm	lm	--	ll	--	ll	--	lm	ll	lm	--	lm
1110	LG5	M08423	55.491	lm	ll	lm	ll	lm	lm	ll	ll	ll	lm	lm	ll	ll	lm	ll	ll	ll	lm	lm	lm	lm	ll	ll	ll	ll	lm	lm	ll	lm	lm	ll	ll	ll	lm	lm	lm	lm	ll	lm	ll	lm	lm	ll	lm	lm	lm
1111	LG5	M04721	56.099	lm	ll	lm	ll	lm	lm	ll	ll	ll	lm	lm	ll	ll	lm	ll	ll	ll	lm	lm	lm	lm	ll	ll	ll	ll	lm	lm	ll	lm	lm	ll	ll	ll	lm	lm	lm	lm	ll	lm	ll	lm	lm	ll	lm	lm	lm
1112	LG5	M72671	57.03	lm	ll	ll	--	ll	ll	lm	lm	lm	ll	ll	lm	lm	ll	lm	ll	lm	ll	ll	ll	ll	lm	lm	lm	lm	ll	ll	lm	ll	ll	--	lm	lm	ll	ll	ll	--	lm	ll	lm	ll	ll	ll	ll	ll	ll
1113	LG5	M52550	57.584	lm	ll	ll	--	ll	ll	lm	lm	lm	ll	ll	lm	lm	ll	lm	ll	lm	ll	ll	ll	ll	lm	lm	lm	lm	ll	ll	lm	ll	ll	lm	lm	lm	ll	ll	ll	--	lm	ll	lm	ll	ll	lm	ll	ll	ll
1114	LG5	M54001	57.844	lm	ll	lm	ll	lm	lm	ll	ll	ll	lm	lm	ll	ll	lm	ll	lm	ll	--	lm	lm	lm	ll	ll	ll	ll	lm	lm	ll	lm	lm	ll	ll	ll	lm	lm	lm	lm	ll	lm	ll	lm	lm	ll	lm	lm	lm
1115	LG5	M63395	58.353	hk	hk	hh	kk	hk	h-	kk	kk	kk	h-	hk	kk	kk	hk	kk	hh	kk	--	hk	hk	hh	kk	kk	kk	kk	h-	hk	kk	hk	hh	kk	kk	kk	h-	hk	hk	--	kk	hk	kk	hh	hk	kk	hk	hh	hk
1116	LG5	M07401	59.21	lm	ll	ll	lm	lm	lm	ll	ll	ll	lm	lm	ll	ll	lm	ll	lm	ll	--	lm	lm	lm	ll	ll	ll	ll	lm	lm	ll	--	lm	ll	ll	ll	lm	lm	lm	lm	ll	ll	ll	lm	lm	ll	lm	lm	lm
1117	LG5	M09838	59.514	lm	ll	lm	lm	ll	ll	lm	lm	lm	ll	ll	lm	lm	ll	lm	ll	lm	--	ll	ll	ll	lm	lm	lm	lm	ll	ll	lm	ll	ll	lm	lm	lm	ll	ll	ll	--	lm	ll	lm	--	ll	lm	ll	ll	ll
1118	LG5	M56045	59.987	lm	ll	lm	lm	ll	ll	lm	lm	lm	ll	ll	lm	lm	ll	lm	ll	lm	ll	ll	ll	ll	lm	lm	lm	lm	ll	ll	lm	ll	ll	lm	lm	lm	ll	ll	ll	ll	lm	ll	lm	ll	ll	lm	ll	ll	ll
1119	LG5	M56186	60.416	lm	ll	ll	ll	lm	lm	ll	ll	ll	ll	lm	ll	ll	lm	ll	lm	ll	lm	lm	lm	lm	ll	ll	ll	ll	lm	lm	ll	lm	lm	ll	ll	ll	lm	lm	lm	lm	ll	lm	ll	lm	lm	ll	lm	lm	lm
1120	LG5	M56187	60.744	lm	ll	lm	lm	ll	ll	lm	lm	lm	ll	ll	lm	lm	ll	lm	ll	lm	ll	ll	ll	ll	lm	lm	lm	lm	ll	ll	lm	ll	ll	lm	lm	lm	ll	ll	ll	ll	lm	ll	lm	ll	ll	lm	ll	ll	ll
1121	LG5	M08952	62.055	lm	ll	ll	--	lm	lm	ll	ll	ll	lm	lm	ll	ll	--	ll	lm	ll	lm	--	--	ll	ll	ll	ll	ll	lm	lm	ll	lm	ll	ll	ll	ll	ll	lm	lm	ll	ll	lm	--	lm	--	ll	lm	--	lm
1122	LG5	cms13310	62.546	lm	ll	ll	lm	lm	lm	ll	ll	ll	lm	lm	ll	ll	lm	ll	lm	ll	lm	lm	lm	lm	ll	ll	ll	ll	lm	lm	ll	lm	lm	ll	ll	ll	lm	lm	lm	lm	ll	lm	ll	lm	--	ll	lm	lm	lm
1123	LG5	M12169	63.909	lm	ll	lm	lm	ll	ll	lm	lm	lm	ll	ll	lm	lm	ll	lm	ll	lm	--	ll	ll	lm	lm	lm	lm	lm	ll	ll	lm	ll	ll	lm	lm	lm	ll	ll	ll	lm	lm	ll	lm	ll	ll	lm	ll	ll	ll
1124	LG5	M07877	64.098	lm	ll	lm	lm	ll	ll	lm	lm	lm	ll	ll	lm	lm	ll	lm	ll	lm	--	ll	ll	lm	lm	lm	lm	lm	ll	ll	lm	ll	ll	lm	lm	lm	ll	ll	ll	lm	lm	ll	lm	ll	ll	lm	ll	ll	ll
1125	LG5	M10790	64.261	lm	ll	lm	lm	ll	ll	lm	lm	lm	ll	ll	lm	lm	ll	lm	ll	lm	--	ll	ll	lm	lm	lm	lm	lm	ll	ll	lm	ll	ll	lm	lm	lm	ll	ll	ll	--	lm	ll	lm	ll	ll	lm	ll	ll	ll
1126	LG5	M07582	64.749	lm	ll	lm	lm	ll	ll	lm	lm	lm	ll	ll	lm	lm	ll	lm	ll	lm	--	ll	ll	lm	lm	lm	lm	lm	ll	ll	lm	ll	ll	lm	lm	lm	ll	ll	ll	lm	lm	ll	lm	ll	ll	lm	ll	ll	ll
1127	LG5	M03144	65.249	lm	ll	lm	lm	ll	ll	lm	lm	lm	--	ll	lm	lm	--	lm	ll	lm	--	ll	ll	lm	lm	lm	lm	lm	ll	ll	lm	ll	ll	lm	lm	lm	ll	ll	ll	ll	lm	ll	lm	ll	ll	lm	ll	ll	ll
1128	LG5	M04600	65.38	lm	ll	lm	lm	ll	ll	lm	lm	lm	--	ll	lm	lm	--	lm	ll	lm	--	ll	ll	lm	lm	lm	lm	lm	ll	ll	lm	--	ll	lm	lm	lm	ll	ll	ll	ll	lm	ll	lm	ll	ll	lm	ll	ll	ll
1129	LG5	M08740	65.602	nn	np	np	np	nn	nn	np	np	np	nn	nn	np	np	nn	np	nn	nn	--	nn	nn	np	np	np	np	np	nn	nn	np	nn	nn	nn	np	np	nn	nn	nn	nn	np	nn	nn	nn	nn	--	nn	nn	nn
1130	LG5	M04924	65.838	lm	ll	lm	lm	ll	ll	lm	lm	lm	ll	ll	lm	lm	ll	lm	ll	lm	--	ll	ll	lm	lm	lm	lm	lm	ll	ll	lm	ll	ll	lm	lm	lm	ll	ll	ll	ll	lm	ll	lm	ll	ll	--	ll	ll	ll
1131	LG5	M54738	66.123	lm	ll	lm	lm	ll	ll	lm	lm	lm	ll	ll	lm	lm	ll	lm	ll	--	--	ll	ll	lm	lm	lm	lm	lm	ll	ll	lm	ll	ll	lm	lm	lm	ll	ll	ll	ll	lm	ll	lm	ll	ll	lm	ll	ll	ll
1132	LG5	M53433	66.322	lm	ll	ll	ll	lm	lm	ll	ll	ll	lm	lm	ll	ll	lm	ll	lm	ll	--	lm	lm	ll	ll	ll	ll	ll	lm	lm	ll	lm	lm	--	ll	ll	lm	lm	lm	lm	ll	lm	ll	lm	lm	ll	lm	lm	lm
1133	LG5	M72304	66.732	lm	ll	lm	--	ll	ll	lm	--	lm	--	ll	lm	lm	ll	lm	ll	--	--	ll	ll	lm	lm	lm	lm	lm	ll	ll	lm	ll	ll	--	lm	--	ll	ll	ll	ll	lm	ll	lm	ll	ll	lm	ll	ll	ll
1134	LG5	M06367	67.485	hk	hk	--	h-	k-	hk	--	hk	h-	--	hk	hh	h-	--	h-	hh	--	hk	hk	hk	hk	hh	hh	hh	hh	k-	hk	hk	kk	hk	--	--	hh	k-	kk	h-	--	hk	k-	--	hk	hk	hh	hk	hk	hk
1135	LG5	M02436	68.338	lm	ll	ll	lm	lm	lm	--	--	ll	--	--	--	ll	--	ll	lm	--	--	lm	ll	ll	ll	ll	ll	ll	lm	lm	ll	ll	lm	--	ll	ll	ll	lm	ll	--	ll	--	--	lm	--	ll	ll	ll	lm
1136	LG5	M08048	69.024	lm	ll	ll	ll	lm	lm	ll	ll	ll	lm	lm	ll	ll	--	ll	lm	--	ll	lm	lm	ll	ll	ll	ll	ll	lm	lm	ll	lm	ll	--	ll	--	lm	lm	ll	lm	ll	lm	ll	lm	--	ll	lm	--	lm
1137	LG5	M11303	69.668	lm	ll	ll	ll	lm	lm	ll	ll	ll	--	lm	lm	ll	lm	ll	lm	ll	lm	lm	lm	ll	ll	ll	ll	ll	lm	lm	ll	lm	lm	ll	ll	ll	lm	lm	ll	lm	ll	lm	ll	lm	lm	ll	lm	lm	lm
1138	LG5	M12266	69.923	lm	ll	ll	ll	lm	lm	ll	ll	ll	lm	lm	ll	ll	ll	ll	lm	ll	lm	lm	lm	ll	ll	ll	ll	ll	lm	lm	ll	lm	lm	ll	ll	ll	lm	lm	ll	lm	ll	lm	ll	lm	lm	ll	lm	lm	lm
1139	LG5	M63955	70.288	lm	ll	--	--	--	ll	ll	ll	ll	ll	ll	ll	ll	ll	--	lm	ll	--	lm	--	lm	ll	lm	ll	ll	--	--	ll	ll	ll	lm	ll	ll	--	--	lm	lm	ll	lm	ll	lm	lm	--	lm	lm	--
1140	LG5	M64749	70.323	lm	ll	lm	lm	ll	ll	lm	lm	lm	ll	ll	lm	lm	ll	lm	ll	lm	--	ll	ll	lm	--	lm	lm	lm	ll	ll	lm	ll	ll	--	lm	lm	ll	ll	lm	ll	lm	ll	lm	ll	ll	--	ll	ll	ll
1141	LG5	M71537	70.822	lm	ll	--	lm	ll	ll	lm	lm	lm	--	ll	lm	lm	--	lm	ll	lm	ll	ll	ll	lm	lm	lm	lm	lm	ll	ll	lm	ll	ll	--	lm	lm	ll	ll	lm	ll	lm	ll	lm	ll	ll	lm	ll	ll	ll
1142	LG5	M11236	71.269	lm	ll	lm	lm	ll	ll	lm	lm	lm	ll	ll	ll	lm	ll	lm	ll	lm	ll	ll	ll	lm	lm	lm	lm	lm	ll	ll	lm	ll	ll	lm	lm	lm	ll	ll	lm	ll	lm	ll	lm	ll	ll	lm	ll	ll	ll
1143	LG5	M10482	71.572	lm	ll	lm	lm	ll	ll	lm	lm	lm	ll	ll	ll	lm	ll	lm	ll	lm	ll	ll	ll	lm	lm	lm	lm	lm	ll	ll	lm	ll	ll	lm	lm	lm	ll	ll	lm	ll	lm	ll	lm	ll	ll	lm	ll	ll	ll
1144	LG5	M04217	71.888	lm	ll	lm	lm	ll	ll	lm	lm	lm	ll	ll	ll	lm	ll	lm	ll	lm	--	ll	ll	lm	lm	lm	lm	lm	ll	ll	lm	ll	ll	ll	lm	--	ll	ll	lm	ll	lm	ll	lm	ll	ll	lm	ll	ll	ll
1145	LG5	M72061	72.213	lm	ll	ll	ll	lm	lm	ll	--	ll	--	lm	lm	ll	--	ll	lm	--	--	lm	lm	ll	ll	--	ll	ll	lm	lm	ll	lm	--	ll	ll	--	lm	--	ll	--	ll	lm	ll	lm	lm	ll	lm	--	lm
1146	LG5	M09786	72.601	lm	ll	ll	--	lm	lm	ll	ll	ll	--	lm	lm	ll	--	ll	lm	ll	--	lm	lm	ll	ll	ll	ll	ll	lm	lm	ll	lm	lm	ll	ll	ll	lm	lm	ll	lm	ll	lm	ll	lm	lm	--	lm	ll	lm
1147	LG5	M63360	73.04	lm	ll	--	--	lm	--	ll	--	ll	lm	lm	lm	ll	--	ll	--	--	--	lm	lm	--	ll	--	ll	ll	lm	--	ll	lm	--	--	ll	ll	lm	lm	ll	--	ll	lm	ll	lm	lm	--	lm	lm	lm
1148	LG5	M07387	73.647	lm	ll	lm	--	ll	ll	lm	lm	lm	ll	ll	ll	lm	ll	lm	ll	lm	ll	ll	ll	lm	lm	lm	lm	lm	ll	lm	lm	ll	ll	lm	lm	lm	ll	ll	lm	ll	lm	ll	lm	ll	ll	lm	ll	ll	ll
1149	LG5	M06552	73.87	lm	ll	lm	--	ll	lm	lm	lm	lm	ll	ll	ll	lm	ll	lm	ll	lm	ll	ll	ll	lm	lm	lm	lm	lm	ll	lm	lm	ll	ll	lm	lm	lm	ll	ll	lm	ll	lm	ll	lm	ll	ll	lm	ll	ll	ll
1150	LG5	M69216	74.316	lm	ll	ll	ll	lm	ll	ll	ll	ll	--	lm	lm	ll	lm	ll	lm	ll	--	lm	lm	ll	ll	ll	ll	ll	lm	ll	ll	lm	lm	ll	ll	ll	lm	lm	ll	lm	ll	lm	ll	lm	lm	ll	lm	lm	lm
1151	LG5	M06229	74.891	lm	ll	ll	ll	lm	ll	ll	ll	ll	--	lm	ll	ll	--	ll	lm	ll	lm	lm	lm	ll	ll	ll	ll	ll	lm	ll	ll	lm	lm	ll	ll	ll	lm	lm	ll	lm	ll	lm	ll	lm	lm	ll	lm	lm	lm
1152	LG5	M12034	75.467	lm	ll	ll	ll	lm	ll	ll	ll	ll	--	lm	lm	ll	ll	ll	lm	ll	--	lm	lm	ll	ll	ll	ll	ll	lm	ll	ll	lm	lm	ll	ll	ll	lm	lm	ll	lm	ll	lm	ll	lm	lm	ll	lm	lm	lm
1153	LG5	M60942	76.348	lm	ll	ll	lm	ll	--	lm	lm	lm	ll	ll	ll	--	ll	lm	ll	--	--	ll	ll	lm	lm	lm	ll	lm	ll	lm	lm	ll	ll	--	--	lm	ll	ll	lm	ll	lm	ll	--	--	ll	lm	ll	ll	ll
1154	LG5	M11596	77.152	lm	ll	lm	--	ll	lm	lm	lm	lm	ll	ll	ll	lm	ll	lm	ll	lm	ll	ll	ll	lm	lm	lm	lm	ll	ll	lm	lm	ll	ll	lm	lm	lm	ll	ll	lm	ll	lm	ll	lm	ll	lm	lm	ll	ll	ll
1155	LG5	M04012	77.824	lm	ll	lm	lm	ll	lm	lm	lm	lm	ll	ll	ll	lm	ll	lm	ll	lm	ll	ll	ll	lm	lm	lm	lm	ll	ll	lm	lm	ll	ll	lm	lm	lm	ll	ll	lm	ll	lm	ll	lm	ll	lm	lm	ll	ll	ll
1156	LG5	M04781	77.829	lm	ll	lm	lm	ll	lm	lm	lm	lm	ll	ll	ll	lm	ll	lm	ll	lm	ll	ll	ll	lm	lm	lm	lm	ll	ll	lm	lm	ll	ll	lm	lm	lm	ll	ll	lm	ll	lm	ll	lm	ll	lm	lm	ll	ll	ll
1157	LG5	M61921	78.381	lm	ll	lm	--	ll	lm	lm	lm	lm	--	ll	ll	lm	ll	lm	ll	lm	--	ll	ll	lm	lm	lm	lm	ll	ll	lm	lm	ll	ll	--	lm	lm	ll	ll	lm	ll	lm	ll	lm	ll	lm	lm	ll	ll	ll
1158	LG5	M08280	78.952	lm	ll	lm	--	ll	lm	lm	lm	lm	ll	ll	ll	lm	ll	lm	ll	lm	--	ll	ll	lm	--	lm	lm	ll	ll	--	lm	ll	ll	lm	lm	lm	ll	ll	lm	ll	lm	ll	lm	ll	lm	lm	ll	ll	ll
1159	LG5	M09567	79.632	lm	ll	lm	--	ll	lm	lm	lm	lm	ll	ll	ll	lm	ll	lm	ll	--	ll	ll	ll	lm	lm	lm	lm	ll	ll	lm	lm	ll	ll	--	lm	lm	ll	ll	lm	ll	lm	ll	lm	--	lm	lm	ll	ll	ll
1160	LG5	M54336	79.87	lm	ll	lm	--	ll	lm	lm	lm	lm	--	ll	ll	lm	--	lm	ll	lm	ll	ll	ll	lm	lm	lm	lm	ll	ll	lm	lm	ll	ll	lm	lm	lm	ll	ll	lm	ll	lm	ll	lm	ll	lm	lm	ll	ll	ll
1161	LG5	M70247	80.874	lm	ll	lm	--	ll	lm	lm	lm	lm	ll	ll	ll	lm	ll	lm	ll	--	ll	ll	ll	lm	lm	lm	lm	ll	ll	lm	lm	ll	ll	--	lm	lm	ll	ll	lm	ll	lm	ll	--	ll	lm	lm	ll	ll	ll
1162	LG5	M63683	81.161	lm	ll	ll	ll	lm	ll	ll	ll	ll	lm	lm	lm	ll	lm	ll	lm	ll	lm	lm	lm	ll	ll	ll	ll	lm	lm	ll	ll	lm	lm	ll	ll	ll	lm	lm	ll	lm	ll	lm	ll	lm	ll	ll	--	lm	lm
1163	LG5	M09944	81.542	lm	ll	ll	ll	lm	ll	ll	ll	ll	--	lm	lm	ll	ll	ll	lm	ll	--	lm	lm	ll	ll	ll	ll	lm	lm	ll	ll	lm	lm	ll	ll	ll	lm	lm	ll	lm	ll	--	ll	lm	ll	ll	lm	lm	--
1164	LG5	M09319	81.933	lm	ll	ll	ll	lm	ll	ll	ll	ll	lm	lm	lm	ll	lm	ll	lm	ll	ll	lm	lm	ll	ll	ll	ll	lm	lm	ll	ll	lm	lm	ll	ll	ll	ll	lm	ll	lm	ll	lm	ll	lm	ll	ll	lm	lm	lm
1165	LG5	M11972	82.263	lm	ll	ll	ll	lm	ll	ll	ll	ll	lm	lm	lm	ll	lm	ll	lm	ll	ll	lm	lm	ll	ll	ll	ll	lm	lm	ll	ll	lm	lm	ll	ll	ll	ll	lm	ll	lm	ll	lm	ll	lm	ll	ll	ll	ll	lm
1166	LG5	M68999	82.898	lm	ll	lm	lm	ll	lm	lm	lm	lm	--	ll	ll	lm	ll	lm	ll	lm	ll	ll	ll	lm	lm	lm	lm	ll	ll	lm	lm	ll	ll	lm	lm	lm	lm	ll	--	ll	lm	ll	lm	--	lm	ll	ll	lm	ll
1167	LG5	M68998	83.384	lm	ll	lm	lm	ll	lm	lm	lm	lm	--	ll	ll	lm	ll	lm	ll	lm	ll	ll	ll	lm	lm	lm	lm	ll	ll	lm	lm	ll	ll	lm	lm	lm	lm	ll	--	ll	lm	ll	lm	--	lm	ll	ll	ll	ll
1168	LG5	M07854	83.868	lm	ll	lm	--	ll	lm	lm	lm	lm	ll	ll	ll	lm	ll	lm	ll	lm	ll	ll	ll	ll	lm	lm	lm	ll	ll	lm	lm	ll	ll	lm	lm	lm	lm	ll	lm	ll	lm	ll	lm	ll	--	lm	ll	ll	ll
1169	LG5	M10545	84.767	lm	ll	ll	lm	lm	ll	ll	ll	ll	lm	lm	lm	ll	lm	ll	lm	ll	ll	lm	lm	ll	ll	ll	ll	lm	lm	ll	ll	lm	lm	ll	ll	ll	ll	lm	ll	lm	ll	lm	ll	lm	ll	ll	lm	lm	lm
1170	LG5	M00241	85.27	lm	ll	ll	ll	lm	ll	ll	ll	ll	lm	lm	lm	ll	lm	ll	lm	ll	ll	lm	lm	ll	ll	ll	ll	lm	lm	ll	ll	lm	lm	ll	ll	ll	ll	lm	ll	lm	ll	lm	ll	lm	ll	ll	lm	lm	lm
1171	LG5	M03226	85.636	lm	ll	ll	lm	lm	ll	ll	ll	ll	lm	lm	lm	ll	lm	ll	lm	ll	ll	lm	lm	ll	ll	ll	ll	lm	lm	ll	ll	lm	lm	ll	ll	ll	ll	lm	ll	lm	ll	lm	ll	lm	ll	ll	lm	lm	lm
1172	LG5	M61974	86.215	lm	ll	lm	lm	ll	lm	lm	lm	lm	ll	ll	ll	lm	ll	lm	ll	lm	--	ll	ll	lm	lm	lm	lm	ll	ll	lm	lm	ll	ll	--	lm	lm	lm	ll	lm	ll	lm	ll	lm	ll	lm	lm	ll	ll	ll
1173	LG5	M61971	86.54	lm	ll	lm	lm	ll	lm	lm	lm	lm	ll	ll	ll	lm	ll	lm	ll	lm	--	ll	ll	lm	lm	lm	lm	ll	ll	lm	lm	ll	ll	lm	lm	lm	lm	ll	lm	ll	lm	ll	lm	ll	lm	lm	ll	ll	ll
1174	LG5	M02016	87.906	lm	ll	ll	ll	lm	ll	ll	ll	ll	--	lm	lm	ll	ll	ll	lm	ll	--	lm	lm	ll	ll	ll	ll	lm	lm	ll	ll	--	--	--	ll	ll	ll	lm	ll	lm	ll	lm	--	lm	ll	ll	lm	lm	lm
1175	LG5	M00599	88.533	lm	ll	ll	ll	lm	ll	--	ll	ll	lm	--	lm	ll	--	ll	lm	--	--	lm	lm	ll	ll	ll	ll	lm	lm	ll	ll	lm	ll	--	ll	ll	ll	lm	ll	lm	ll	lm	ll	lm	ll	--	lm	lm	lm
1176	LG5	M08208	89.526	hk	hk	hh	hh	hk	hh	kk	hh	hh	k-	hk	hh	h-	hh	h-	k-	--	hk	h-	hk	hh	--	hh	--	hk	hk	hh	hh	hh	hh	--	hh	hh	hk	kk	h-	hk	hh	k-	--	hh	hh	--	hk	kk	hh
1177	LG5	M06958	90.751	lm	ll	ll	ll	lm	ll	ll	ll	ll	lm	lm	lm	ll	--	ll	lm	ll	ll	lm	lm	ll	ll	ll	ll	lm	lm	ll	ll	lm	lm	ll	ll	ll	ll	lm	ll	lm	ll	lm	ll	lm	ll	ll	lm	--	ll
1178	LG5	M53963	91.085	lm	ll	ll	lm	lm	ll	ll	ll	ll	lm	--	lm	ll	lm	ll	lm	ll	ll	lm	lm	ll	ll	ll	ll	lm	lm	ll	ll	lm	lm	ll	ll	ll	ll	lm	ll	ll	ll	lm	ll	lm	ll	ll	--	lm	ll
1179	LG5	M00025	92.694	lm	ll	lm	lm	ll	lm	lm	lm	lm	--	ll	ll	lm	--	lm	ll	--	lm	ll	ll	--	lm	lm	--	ll	ll	lm	lm	ll	--	lm	lm	lm	lm	ll	lm	--	ll	lm	lm	ll	lm	--	ll	ll	lm
1180	LG5	M03051	92.852	lm	ll	lm	lm	ll	lm	lm	lm	lm	--	ll	ll	lm	--	lm	ll	--	lm	ll	ll	--	lm	lm	--	ll	ll	lm	lm	ll	--	lm	lm	lm	lm	ll	lm	--	ll	ll	lm	ll	lm	--	ll	ll	lm
1181	LG5	M06269	93.642	lm	ll	lm	lm	ll	lm	lm	lm	lm	lm	ll	ll	lm	lm	lm	ll	lm	--	ll	ll	lm	lm	lm	lm	ll	ll	lm	lm	ll	--	lm	lm	ll	lm	lm	lm	ll	lm	ll	lm	ll	lm	lm	ll	ll	lm
1182	LG5	M12206	94.091	lm	ll	lm	lm	ll	lm	lm	lm	lm	ll	ll	ll	lm	ll	lm	ll	lm	--	ll	ll	lm	lm	lm	lm	ll	ll	lm	lm	ll	ll	lm	lm	ll	lm	ll	lm	ll	lm	ll	lm	ll	lm	ll	ll	ll	lm
1183	LG5	M05759	94.417	nn	np	np	nn	np	nn	nn	nn	--	np	np	np	np	--	nn	np	nn	np	np	np	np	np	nn	nn	np	np	nn	np	np	np	nn	nn	np	nn	np	--	np	nn	np	--	np	nn	nn	np	--	nn
1184	LG5	M01091	95.241	lm	ll	lm	lm	ll	lm	lm	lm	lm	ll	ll	ll	lm	ll	lm	ll	lm	--	ll	ll	lm	lm	--	lm	ll	ll	lm	lm	ll	--	lm	lm	--	ll	--	lm	ll	lm	ll	ll	ll	lm	lm	ll	ll	lm
1185	LG5	M02057	95.545	lm	ll	lm	ll	lm	ll	ll	--	--	lm	--	lm	lm	ll	ll	lm	ll	ll	--	lm	lm	lm	ll	ll	lm	lm	ll	lm	lm	lm	ll	ll	--	ll	lm	lm	lm	ll	lm	--	lm	lm	ll	lm	lm	ll
1186	LG5	M10530	95.67	lm	ll	lm	ll	lm	ll	ll	--	--	lm	--	lm	lm	ll	ll	lm	ll	ll	--	lm	lm	lm	ll	ll	lm	lm	ll	lm	lm	lm	--	ll	--	ll	lm	lm	lm	ll	lm	--	lm	lm	ll	lm	lm	ll
1187	LG5	M01485	95.762	nn	np	nn	np	nn	np	np	np	--	nn	np	nn	nn	--	np	nn	np	np	np	nn	np	--	np	np	np	--	np	np	nn	nn	np	np	nn	np	--	--	nn	np	nn	--	nn	np	np	nn	np	np
1188	LG5	M08206	95.914	lm	ll	lm	lm	ll	lm	lm	lm	lm	ll	ll	ll	lm	ll	lm	ll	ll	lm	ll	ll	lm	lm	lm	lm	ll	ll	lm	lm	ll	ll	lm	lm	lm	lm	ll	lm	ll	lm	--	lm	ll	lm	lm	ll	ll	lm
1189	LG5	M11652	96.7	lm	ll	lm	lm	ll	lm	--	lm	lm	ll	ll	ll	lm	ll	lm	ll	lm	lm	ll	ll	lm	lm	lm	lm	ll	ll	lm	lm	ll	ll	lm	lm	lm	lm	ll	--	ll	lm	ll	lm	ll	lm	lm	ll	ll	lm
1190	LG5	M06456	97.203	lm	ll	lm	lm	ll	lm	--	lm	lm	ll	ll	ll	lm	ll	lm	ll	lm	lm	ll	ll	lm	lm	lm	lm	ll	ll	lm	lm	ll	ll	lm	lm	lm	lm	ll	--	ll	lm	ll	lm	ll	lm	--	--	ll	lm
1191	LG5	M06766	97.886	lm	ll	lm	lm	ll	lm	ll	lm	lm	ll	ll	ll	lm	ll	lm	ll	lm	--	ll	ll	lm	lm	lm	lm	ll	ll	lm	lm	ll	ll	lm	lm	lm	lm	ll	lm	ll	lm	ll	lm	ll	lm	lm	ll	ll	lm
1192	LG5	M69487	98.932	lm	ll	lm	lm	ll	lm	lm	lm	lm	ll	ll	ll	lm	ll	lm	ll	lm	--	ll	ll	lm	lm	lm	lm	ll	ll	lm	lm	ll	--	lm	lm	lm	lm	ll	lm	ll	lm	ll	lm	lm	lm	lm	ll	ll	lm
1193	LG5	M69486	98.98	lm	ll	lm	lm	ll	lm	lm	lm	lm	ll	ll	ll	lm	ll	lm	ll	lm	--	ll	ll	lm	lm	lm	lm	ll	ll	lm	lm	ll	--	lm	lm	lm	lm	ll	lm	ll	lm	ll	lm	lm	lm	lm	ll	ll	lm
1194	LG5	M02849	99.047	nn	np	nn	nn	nn	np	np	np	nn	nn	np	nn	nn	np	np	nn	np	--	np	nn	nn	nn	np	np	np	np	np	nn	nn	nn	nn	np	np	np	np	nn	nn	np	--	nn	--	nn	np	nn	np	np
1195	LG5	M11556	99.321	nn	np	nn	np	nn	nn	np	nn	nn	nn	np	nn	nn	np	np	nn	np	nn	np	nn	nn	--	np	np	np	np	np	nn	nn	nn	nn	np	np	np	np	--	nn	np	nn	nn	nn	--	np	np	np	np
1196	LG5	M06122	99.841	nn	np	nn	nn	nn	nn	np	nn	nn	nn	np	nn	nn	np	np	nn	np	nn	np	nn	nn	--	np	np	np	np	np	nn	nn	nn	nn	np	np	np	np	--	nn	np	nn	nn	nn	nn	np	nn	np	np
1197	LG5	M04150	100.015	hk	hk	hk	hk	hh	--	--	--	hk	--	hh	hh	hk	--	kk	hh	kk	hk	hh	hh	hk	hk	kk	kk	hh	hh	kk	hk	hh	--	hk	kk	kk	kk	hh	hk	hh	kk	hh	kk	hk	hk	kk	hh	hh	kk
1198	LG5	M07407	100.018	hk	hk	hk	hk	kk	--	--	--	hk	--	kk	kk	hk	--	hh	kk	hh	hk	kk	kk	hk	h-	hh	hh	kk	kk	hh	hk	kk	--	hk	hh	hh	hh	kk	hk	kk	hh	kk	hh	hk	hk	hh	kk	kk	hh
1199	LG5	M11400	100.825	lm	ll	lm	lm	ll	lm	lm	lm	lm	--	ll	ll	lm	ll	lm	ll	lm	lm	ll	ll	lm	lm	lm	lm	ll	ll	lm	lm	ll	ll	lm	lm	lm	lm	ll	lm	--	lm	ll	lm	ll	lm	lm	ll	ll	lm
1200	LG5	M53510	102.37	nn	np	np	nn	np	nn	np	nn	nn	nn	np	np	nn	--	nn	np	nn	np	--	np	np	--	np	nn	np	np	nn	nn	--	--	--	nn	nn	nn	np	np	--	nn	np	np	nn	nn	nn	np	np	nn
1201	LG5	M53507	102.531	nn	np	np	nn	np	nn	np	nn	nn	nn	np	np	nn	--	nn	np	nn	np	--	np	np	--	np	nn	np	np	nn	nn	--	--	--	nn	nn	nn	np	np	--	nn	np	np	nn	nn	nn	np	np	nn
1202	LG5	M04173	102.839	lm	ll	lm	lm	ll	lm	lm	lm	lm	ll	ll	ll	lm	lm	lm	ll	lm	--	ll	ll	lm	lm	lm	lm	ll	ll	lm	lm	lm	ll	--	lm	lm	lm	ll	lm	ll	lm	--	lm	lm	lm	lm	ll	ll	lm
1203	LG5	M68678	103.397	lm	ll	lm	lm	ll	lm	lm	lm	lm	ll	ll	--	lm	lm	lm	ll	lm	lm	ll	ll	lm	lm	lm	lm	ll	ll	lm	lm	lm	ll	lm	lm	lm	lm	ll	lm	--	lm	ll	lm	lm	lm	lm	ll	ll	lm
1204	LG5	M53504	103.66	nn	np	np	nn	np	nn	np	nn	nn	nn	np	np	nn	--	nn	np	nn	np	--	np	np	--	np	nn	np	np	nn	nn	--	--	--	nn	nn	nn	np	np	--	nn	np	np	nn	nn	nn	np	np	nn
1205	LG5	M70983	104.092	lm	ll	lm	lm	ll	lm	ll	lm	lm	--	ll	ll	lm	--	lm	ll	lm	ll	ll	ll	lm	lm	lm	lm	ll	ll	lm	lm	lm	--	lm	lm	lm	lm	ll	lm	ll	lm	ll	lm	lm	lm	lm	ll	ll	lm
1206	LG5	M01530	104.372	lm	ll	lm	--	ll	lm	ll	--	lm	--	ll	ll	lm	lm	lm	ll	lm	--	ll	ll	lm	ll	lm	lm	ll	ll	lm	lm	lm	ll	lm	lm	lm	lm	ll	lm	ll	lm	ll	lm	lm	lm	lm	ll	ll	lm
1207	LG5	M02023	105.21	hk	hk	hk	kk	hh	kk	kk	hk	hk	hh	hk	hh	hk	hk	kk	hh	kk	hh	hk	hh	hk	hk	kk	kk	hk	hk	kk	hk	hh	hh	hh	kk	kk	kk	hk	hk	hh	kk	hh	hk	hh	hk	kk	hk	hk	kk
1208	LG5	M00674	106.715	lm	ll	lm	lm	ll	lm	lm	lm	lm	lm	lm	ll	lm	--	lm	ll	lm	lm	lm	ll	--	lm	lm	lm	lm	--	lm	--	ll	ll	lm	lm	lm	lm	lm	lm	ll	lm	ll	--	ll	lm	lm	ll	--	lm
1209	LG5	M01747	107.407	hk	hk	hk	kk	hh	kk	hk	kk	hk	hk	hk	hh	hk	hk	kk	hh	kk	hk	hk	hh	hk	hk	kk	kk	hk	hk	kk	hk	hh	hh	hk	kk	kk	kk	hk	hk	hh	kk	hh	hk	hk	hk	kk	hh	hk	kk
1210	LG5	M01580	107.466	hk	hk	hk	hh	kk	hh	hk	hh	hk	hk	hk	kk	hk	hk	hh	kk	hh	hk	hk	kk	hk	hk	hh	hh	hk	hk	hh	hk	kk	kk	hk	hh	hh	hh	hk	hk	kk	hh	kk	hk	hk	hk	hh	kk	hk	hh
1211	LG5	M00834	107.933	lm	ll	lm	lm	lm	lm	lm	lm	lm	--	lm	ll	lm	ll	lm	ll	lm	ll	ll	ll	lm	lm	lm	lm	ll	lm	lm	lm	ll	--	lm	lm	lm	lm	ll	lm	ll	lm	lm	--	--	lm	lm	lm	lm	ll
1212	LG5	M07982	108.51	nn	np	np	nn	np	nn	np	nn	nn	nn	np	np	np	nn	nn	np	nn	--	np	np	--	np	nn	nn	np	np	nn	np	--	np	--	nn	nn	nn	np	np	np	nn	np	--	nn	np	nn	np	nn	nn
1213	LG5	M11127	108.687	lm	ll	ll	lm	ll	lm	lm	lm	lm	--	lm	ll	--	lm	lm	ll	--	--	--	ll	lm	ll	lm	lm	lm	lm	lm	--	ll	--	lm	lm	lm	lm	--	--	--	lm	ll	ll	ll	lm	lm	ll	ll	lm
1214	LG5	M61886	109.012	hk	hk	hk	hh	kk	hh	k-	hh	hk	hk	hk	kk	hk	k-	hh	kk	hk	hk	hk	kk	hk	hk	hh	hh	hk	hk	hh	hk	kk	kk	k-	hh	hh	hh	hk	hk	kk	hh	kk	hk	hk	hk	hh	kk	hk	hh
1215	LG5	M64407	109.952	lm	ll	--	lm	ll	lm	ll	lm	lm	ll	lm	ll	lm	--	lm	--	--	--	ll	ll	--	--	--	lm	ll	ll	lm	lm	lm	ll	lm	lm	lm	lm	ll	lm	ll	lm	ll	--	--	lm	--	ll	ll	lm
1216	LG5	M64406	110.235	lm	ll	--	lm	ll	lm	ll	lm	lm	ll	lm	ll	lm	--	lm	--	--	--	ll	ll	--	--	--	lm	ll	ll	lm	lm	lm	ll	lm	lm	lm	lm	ll	lm	ll	lm	ll	--	--	lm	--	ll	ll	lm
1217	LG5	M11458	110.6	nn	np	--	np	nn	np	--	--	np	nn	--	nn	np	np	np	nn	np	--	--	nn	--	np	np	np	--	--	np	--	--	nn	--	np	np	np	nn	np	nn	np	nn	--	--	--	np	nn	np	np
1218	LG5	M01291	111.154	lm	ll	lm	lm	ll	--	--	ll	lm	ll	ll	ll	lm	ll	lm	ll	lm	--	ll	ll	ll	lm	--	lm	ll	ll	lm	lm	ll	ll	lm	lm	ll	lm	ll	lm	ll	lm	ll	lm	lm	lm	ll	ll	ll	lm
1219	LG5	M68680	111.919	hk	hk	hk	hk	hh	kk	k-	kk	kk	hk	hk	--	hk	kk	kk	hh	kk	hk	hk	hh	hk	hk	kk	kk	hk	hk	kk	hk	hk	hh	hk	kk	kk	kk	hk	hk	--	kk	hh	hk	hk	hk	kk	hh	k-	kk
1220	LG5	M68679	112.234	hk	hk	hk	hk	kk	hh	h-	hh	hh	hk	hk	--	hk	hh	hh	kk	hh	hk	hk	kk	hk	hk	hh	hh	hk	hk	hh	hk	hk	kk	hk	hh	hh	hh	hk	hk	--	hh	kk	hk	hk	hk	hh	kk	h-	hh
1221	LG5	M10616	112.728	nn	np	--	--	nn	np	nn	np	np	--	np	nn	--	np	np	nn	np	np	np	nn	--	np	np	np	np	np	np	np	--	nn	np	np	np	np	--	--	nn	np	nn	--	np	np	np	nn	--	np
1222	LG5	M05262	112.879	lm	ll	--	lm	lm	ll	lm	ll	--	ll	lm	lm	lm	lm	ll	lm	ll	lm	lm	lm	lm	lm	ll	ll	lm	--	ll	--	lm	lm	--	ll	ll	ll	lm	lm	lm	ll	lm	--	--	lm	ll	lm	ll	ll
1223	LG5	M67819	113.578	hk	hk	hk	hk	kk	hh	hk	hh	hh	hk	hk	kk	hk	hh	hh	kk	hh	--	hk	kk	hk	hk	hh	hh	hk	hk	hh	hk	hk	kk	h-	hh	hh	hh	hk	hk	kk	hh	kk	hk	h-	hk	hh	kk	hk	hh
1224	LG5	M03704	113.819	lm	ll	ll	lm	ll	lm	lm	lm	lm	lm	lm	ll	lm	lm	lm	ll	lm	lm	lm	ll	lm	lm	lm	lm	lm	lm	lm	lm	ll	ll	ll	lm	lm	lm	--	lm	--	lm	ll	lm	lm	lm	lm	ll	lm	lm
1225	LG5	M51051	114.474	nn	np	nn	nn	nn	np	nn	--	nn	np	np	nn	nn	np	np	nn	np	nn	np	nn	nn	nn	np	np	np	np	np	nn	nn	--	nn	np	np	np	np	nn	nn	np	nn	nn	--	nn	np	nn	np	np
1226	LG5	M08220	115.713	nn	np	nn	nn	nn	np	nn	--	nn	np	np	nn	nn	np	np	nn	np	--	np	nn	nn	nn	np	np	np	np	np	nn	nn	nn	--	np	--	np	np	nn	nn	np	--	nn	nn	nn	np	nn	np	np
1227	LG5	M00969	115.804	nn	np	nn	nn	nn	np	nn	--	nn	np	np	nn	nn	np	np	nn	np	--	np	nn	nn	nn	np	np	np	np	np	nn	nn	nn	--	np	--	np	np	nn	nn	np	--	nn	nn	nn	np	nn	np	np
1228	LG5	M10055	116.451	nn	np	nn	nn	nn	np	nn	--	nn	np	np	nn	nn	np	np	nn	np	--	np	nn	nn	nn	np	np	np	np	np	nn	nn	nn	--	np	--	np	np	nn	nn	np	nn	nn	nn	nn	np	nn	np	np
1229	LG5	M68560	116.896	hk	hk	hk	kk	hh	kk	hh	kk	kk	hk	hk	hh	hk	kk	kk	hh	kk	hk	hk	hh	hk	hk	hk	kk	hk	hk	kk	hk	hk	hh	hk	kk	kk	kk	h-	hk	hh	kk	hh	hk	hk	hk	kk	hh	hk	kk
1230	LG5	M53502	117.818	hk	hk	hk	kk	hh	kk	hh	--	kk	hk	hk	hh	hk	--	kk	hh	kk	hh	hk	hh	hk	hk	hk	kk	hk	hk	kk	hk	hk	hh	hk	kk	kk	k-	hk	hk	hh	kk	hh	hk	hk	hk	kk	hh	hk	kk
1231	LG5	M11187	120.403	lm	ll	ll	lm	lm	ll	lm	ll	ll	lm	ll	lm	lm	ll	ll	lm	ll	lm	lm	lm	lm	--	lm	ll	lm	--	ll	--	--	lm	lm	ll	ll	ll	lm	lm	lm	ll	lm	lm	lm	lm	ll	lm	lm	ll
1232	LG5	M70062	120.454	nn	np	nn	nn	nn	np	nn	nn	np	nn	np	nn	nn	np	np	nn	--	nn	np	nn	nn	nn	np	np	np	np	np	nn	nn	nn	nn	--	np	np	--	nn	nn	np	nn	nn	nn	nn	np	nn	--	np
1233	LG5	M12119	121.685	nn	np	nn	nn	nn	np	nn	np	np	np	np	nn	nn	np	np	nn	np	nn	np	nn	nn	nn	np	np	np	np	np	nn	nn	nn	nn	np	--	np	np	nn	nn	np	nn	nn	nn	nn	np	nn	np	np
1234	LG5	M07492	122.3	lm	ll	lm	ll	lm	ll	lm	ll	ll	lm	lm	lm	lm	ll	ll	lm	ll	lm	lm	lm	lm	lm	lm	ll	lm	lm	ll	lm	lm	--	lm	ll	--	ll	lm	lm	lm	ll	lm	lm	lm	lm	--	lm	lm	ll
1235	LG5	M06156	122.953	lm	ll	lm	ll	lm	ll	lm	ll	ll	lm	ll	lm	lm	ll	ll	lm	ll	lm	lm	lm	lm	lm	lm	ll	lm	lm	ll	lm	lm	--	lm	ll	ll	ll	lm	lm	lm	ll	lm	lm	lm	lm	ll	lm	lm	ll
1236	LG5	M05171	123.721	lm	ll	lm	ll	lm	ll	lm	ll	ll	lm	ll	lm	lm	ll	ll	lm	ll	lm	lm	lm	lm	lm	lm	ll	lm	lm	ll	lm	lm	lm	lm	ll	ll	ll	lm	lm	lm	ll	lm	lm	lm	lm	ll	lm	lm	ll
1237	LG5	M01730	124.876	lm	ll	lm	lm	lm	ll	lm	ll	ll	lm	ll	lm	lm	ll	ll	lm	ll	--	lm	lm	lm	lm	lm	ll	lm	lm	ll	lm	lm	lm	lm	ll	ll	ll	lm	lm	lm	ll	lm	lm	lm	lm	--	lm	lm	ll
1238	LG5	M01683	125.665	lm	ll	lm	lm	lm	ll	lm	ll	ll	lm	ll	lm	lm	ll	ll	lm	ll	--	lm	lm	lm	lm	lm	ll	lm	lm	ll	lm	lm	lm	lm	ll	ll	ll	lm	lm	lm	ll	lm	lm	lm	lm	lm	lm	lm	ll
1239	LG5	M63890	127.041	nn	np	nn	nn	nn	np	nn	np	np	np	np	nn	nn	np	np	--	np	--	np	--	nn	nn	nn	np	--	np	np	nn	nn	nn	nn	np	np	np	np	nn	nn	np	--	--	nn	nn	np	--	--	np
1240	LG5	M63888	127.149	nn	np	nn	nn	nn	np	nn	np	np	np	np	nn	nn	np	np	--	np	--	np	--	nn	nn	nn	np	--	np	np	nn	nn	nn	nn	np	np	np	np	nn	nn	np	--	--	nn	nn	np	--	--	np
1241	LG5	M02175	128.924	lm	ll	--	ll	lm	ll	lm	ll	ll	lm	ll	lm	ll	--	ll	lm	ll	--	lm	lm	lm	lm	lm	lm	lm	lm	ll	lm	--	lm	ll	ll	ll	--	lm	lm	lm	ll	lm	lm	lm	lm	ll	lm	lm	ll
1242	LG5	M55376	132.026	nn	np	nn	nn	nn	np	nn	np	np	np	np	nn	nn	np	np	nn	np	nn	np	nn	nn	nn	nn	nn	np	nn	np	nn	nn	nn	nn	np	np	np	--	nn	--	np	nn	nn	nn	nn	--	nn	np	np
1243	LG5	M06674	134.248	nn	np	nn	nn	nn	np	nn	--	np	--	nn	nn	nn	np	np	nn	np	nn	np	nn	nn	nn	nn	nn	np	nn	np	nn	nn	nn	nn	np	np	np	--	nn	nn	np	nn	nn	nn	nn	nn	nn	--	np
1244	LG5	M09456	136.1	nn	np	nn	nn	nn	np	nn	np	nn	np	np	nn	nn	np	np	nn	np	nn	--	nn	nn	nn	nn	nn	np	nn	np	nn	nn	nn	nn	np	np	np	np	nn	nn	np	nn	nn	nn	nn	nn	nn	np	np
1245	LG5	M07875	138.243	lm	ll	lm	lm	lm	lm	ll	lm	lm	lm	lm	ll	lm	lm	lm	ll	lm	lm	lm	lm	--	lm	lm	lm	lm	ll	lm	lm	lm	ll	ll	lm	lm	lm	lm	lm	ll	lm	lm	lm	lm	lm	lm	ll	lm	lm
1246	LG5	M01122	139.148	hk	hk	h-	kk	hk	kk	hk	kk	kk	--	kk	hh	hk	--	kk	hh	kk	--	hk	hk	hk	h-	hk	hk	hk	hk	kk	hk	hk	--	hk	kk	kk	kk	k-	hk	hh	kk	kk	hk	hk	hk	kk	hk	kk	kk
1247	LG5	M68256	140.246	lm	ll	lm	lm	--	ll	lm	ll	ll	ll	ll	lm	lm	ll	ll	lm	ll	ll	--	--	lm	lm	lm	lm	--	lm	ll	--	--	ll	lm	ll	ll	ll	lm	lm	lm	ll	ll	ll	lm	lm	ll	lm	lm	ll
1248	LG5	M68254	142.782	nn	np	nn	nn	nn	np	nn	np	np	np	np	nn	nn	nn	np	nn	nn	nn	np	nn	nn	nn	nn	nn	--	nn	np	nn	nn	nn	nn	np	np	--	--	nn	nn	np	nn	nn	nn	nn	--	nn	np	np
1249	LG5	M72010	147.599	nn	np	nn	nn	nn	np	nn	nn	np	--	np	nn	nn	--	np	--	np	nn	np	nn	nn	nn	nn	nn	np	nn	np	nn	nn	nn	nn	np	--	np	np	nn	nn	np	nn	nn	nn	nn	np	nn	np	np
1250	LG5	M71699	149.146	nn	np	--	nn	nn	np	nn	nn	np	--	np	--	nn	--	np	np	--	--	np	nn	nn	nn	nn	nn	np	nn	--	nn	--	--	--	--	--	np	np	nn	nn	np	nn	nn	nn	nn	np	nn	np	np
1251	LG5	M07766	153.058	nn	np	--	np	nn	--	nn	--	--	--	--	--	nn	nn	np	nn	--	--	np	nn	nn	nn	nn	nn	np	nn	np	nn	--	--	--	np	nn	np	np	nn	--	np	nn	--	nn	nn	nn	nn	np	nn
1252	LG6	M71977	0	lm	ll	ll	--	ll	lm	ll	ll	lm	ll	ll	lm	lm	ll	lm	--	ll	--	ll	lm	ll	ll	lm	ll	lm	lm	ll	lm	--	--	ll	--	lm	ll	ll	ll	--	lm	lm	ll	lm	lm	lm	ll	lm	lm
1253	LG6	M57348	1.138	lm	ll	ll	ll	ll	ll	lm	ll	lm	--	lm	lm	lm	lm	lm	lm	ll	ll	lm	lm	lm	ll	--	lm	lm	--	ll	lm	lm	--	--	lm	lm	ll	ll	ll	lm	lm	ll	ll	lm	lm	lm	ll	lm	lm
1254	LG6	M07571	2.542	hk	hk	kk	kk	kk	hh	hk	kk	h-	hk	hk	hk	hk	hh	hk	hk	--	--	hk	hh	hh	kk	h-	hk	hh	h-	kk	hh	hh	kk	--	hh	h-	hk	kk	kk	hh	h-	kk	hk	hh	hk	hh	hk	hk	hk
1255	LG6	M61585	4.316	lm	ll	lm	lm	ll	lm	--	ll	lm	ll	lm	--	lm	lm	lm	lm	--	lm	lm	lm	lm	lm	lm	lm	lm	--	ll	lm	--	ll	--	lm	--	--	ll	ll	lm	--	ll	lm	--	lm	lm	ll	--	--
1256	LG6	M71978	5.995	lm	ll	ll	--	ll	--	ll	ll	lm	ll	ll	lm	lm	ll	lm	--	ll	--	ll	lm	ll	ll	lm	ll	lm	lm	ll	lm	--	--	ll	--	lm	ll	ll	ll	--	lm	--	ll	--	lm	lm	ll	lm	lm
1257	LG6	M11392	7.497	lm	ll	ll	ll	ll	ll	ll	ll	lm	--	ll	ll	lm	--	--	lm	ll	lm	ll	lm	ll	ll	lm	--	lm	lm	ll	lm	lm	ll	ll	ll	lm	ll	ll	ll	lm	--	ll	ll	lm	lm	--	ll	lm	lm
1258	LG6	M53428	9.511	lm	ll	ll	ll	--	--	--	ll	lm	ll	ll	--	lm	lm	lm	lm	ll	--	ll	lm	ll	ll	lm	lm	lm	lm	ll	--	lm	ll	ll	lm	lm	ll	ll	--	lm	lm	lm	ll	lm	lm	lm	ll	lm	lm
1259	LG6	M52795	10.227	hk	hk	h-	h-	h-	h-	h-	h-	h-	h-	h-	h-	h-	kk	h-	h-	h-	h-	h-	kk	h-	h-	h-	h-	kk	h-	h-	kk	h-	h-	h-	kk	h-	h-	h-	h-	kk	h-	h-	h-	kk	h-	kk	h-	kk	h-
1260	LG6	M52796	10.39	hk	hk	h-	h-	h-	h-	h-	h-	h-	h-	h-	h-	h-	kk	h-	h-	h-	h-	h-	kk	h-	h-	h-	h-	kk	h-	h-	kk	h-	h-	h-	kk	h-	h-	h-	h-	kk	h-	h-	h-	kk	h-	kk	h-	kk	h-
1261	LG6	M52797	10.946	hk	hk	h-	h-	h-	h-	h-	h-	h-	h-	h-	h-	h-	kk	h-	h-	h-	h-	h-	kk	h-	h-	h-	h-	kk	h-	h-	kk	h-	h-	h-	--	h-	h-	h-	h-	kk	h-	h-	h-	kk	h-	kk	h-	kk	h-
1262	LG6	M71980	11.047	lm	ll	ll	--	ll	ll	ll	ll	lm	ll	ll	lm	lm	ll	lm	--	ll	--	ll	lm	ll	ll	lm	ll	lm	lm	ll	lm	--	--	ll	--	lm	ll	ll	ll	--	lm	ll	ll	ll	lm	lm	ll	lm	lm
1263	LG6	M55360	12.062	lm	ll	--	ll	ll	ll	ll	ll	lm	ll	ll	lm	lm	--	lm	lm	ll	lm	ll	lm	ll	ll	lm	lm	lm	lm	ll	lm	lm	--	ll	lm	--	ll	ll	ll	--	lm	ll	ll	lm	lm	lm	ll	lm	lm
1264	LG6	M00930	12.612	hk	hk	kk	kk	kk	hk	hk	kk	hk	hk	hk	hk	hk	--	hk	hk	kk	hk	hk	hh	hk	kk	hk	hk	hh	hk	kk	hh	hk	kk	--	hh	kk	k-	kk	kk	hh	hk	kk	--	hh	hk	hh	hk	hk	hk
1265	LG6	M04486	13.143	hk	hk	hh	hh	hh	hk	hk	hh	hk	hk	hk	hk	hk	--	hk	hk	hh	hk	hk	kk	hk	hh	hk	hk	kk	hk	hh	kk	hk	hh	--	kk	hh	h-	hh	hh	kk	hk	hh	--	kk	hk	kk	hk	hk	hk
1266	LG6	M00466	13.39	hk	hk	kk	kk	kk	hk	hk	kk	hk	hk	hk	hk	hk	--	hk	hk	kk	hk	hk	hh	hk	kk	hk	hk	hh	hk	kk	hh	hk	kk	--	hh	kk	k-	kk	kk	hh	hk	kk	--	hh	hk	hh	hk	hk	hk
1267	LG6	M07021	14.449	hk	hk	kk	kk	kk	hk	hk	kk	hk	hk	hk	hk	hk	--	hk	hk	kk	hk	hk	hh	hk	kk	hk	hk	hh	hk	kk	hh	hk	kk	--	hh	kk	k-	kk	kk	hh	hk	kk	--	hh	hk	hh	hk	hk	hk
1268	LG6	M03981	14.668	hk	hk	kk	kk	kk	hk	hk	kk	hk	hk	hk	hk	hk	--	hk	hk	kk	hk	hk	hh	hk	k-	hk	hk	hh	hk	kk	hh	hk	kk	--	hh	kk	k-	kk	kk	hh	hk	kk	--	hh	hk	hh	hk	hk	hk
1269	LG6	M72700	18.599	hk	hk	hh	hh	hh	hk	h-	hh	hk	--	hk	hk	hk	--	kk	hk	hh	--	hk	kk	hk	hh	hk	hk	kk	hk	hh	kk	hk	--	--	kk	hk	hk	hh	hh	kk	hk	hh	hk	kk	hk	kk	hk	hk	hk
1270	LG6	M51467	18.733	lm	ll	ll	ll	ll	lm	lm	ll	lm	lm	lm	lm	lm	lm	lm	--	ll	lm	lm	lm	lm	ll	lm	lm	lm	lm	ll	lm	lm	ll	ll	lm	lm	lm	ll	ll	lm	lm	ll	lm	lm	lm	lm	lm	lm	lm
1271	LG6	M00157	19.877	lm	ll	lm	lm	ll	lm	lm	lm	lm	lm	lm	lm	ll	ll	lm	--	lm	ll	lm	ll	lm	lm	lm	lm	ll	lm	lm	ll	ll	ll	lm	lm	lm	ll	lm	lm	lm	ll	lm	lm	lm	--	lm	lm	lm	ll
1272	LG6	M10206	19.985	lm	ll	lm	lm	ll	lm	lm	lm	lm	lm	lm	lm	ll	ll	lm	--	lm	ll	lm	ll	lm	lm	lm	lm	ll	lm	lm	ll	ll	ll	lm	lm	lm	ll	lm	lm	lm	ll	lm	lm	lm	--	lm	lm	lm	ll
1273	LG6	M11609	20.56	hk	hk	kk	kk	kk	hk	hk	kk	hk	kk	hk	hk	hk	hh	hh	hk	kk	--	hk	hh	hk	kk	h-	hk	hh	hk	kk	hh	hk	--	kk	hh	hk	hk	kk	kk	hh	hk	kk	hk	hh	hk	hh	hk	hk	hk
1274	LG6	M02220	21.106	hk	hk	hh	hh	hh	hk	hk	hh	hk	hh	hk	hk	hk	kk	kk	hk	hh	--	hk	kk	hk	hh	k-	hk	kk	hk	hh	kk	hk	--	hh	kk	hk	hk	hh	hh	kk	hk	hh	hk	kk	hk	kk	hk	hk	hk
1275	LG6	M00545	22.93	lm	ll	lm	lm	lm	--	lm	lm	ll	lm	lm	lm	lm	--	ll	lm	lm	ll	lm	ll	--	lm	ll	lm	ll	--	lm	ll	--	lm	--	ll	--	lm	lm	--	ll	lm	lm	lm	ll	lm	ll	lm	lm	lm
1276	LG6	M11546	23.66	hk	hk	hh	hk	hh	hk	hh	hh	kk	hk	hk	hk	hk	hk	kk	hk	hh	kk	hk	kk	hk	hh	kk	hk	kk	hk	hh	kk	hk	hk	hk	kk	hk	hk	hh	hh	kk	hk	hh	kk	kk	hk	kk	hk	hk	hk
1277	LG6	M12621	23.963	lm	ll	lm	lm	lm	lm	lm	lm	ll	--	lm	lm	lm	lm	ll	lm	lm	ll	ll	ll	lm	lm	ll	ll	ll	lm	lm	ll	lm	lm	lm	ll	lm	lm	lm	lm	--	lm	lm	ll	ll	lm	ll	--	lm	lm
1278	LG6	M04532	24.057	lm	ll	lm	lm	lm	lm	lm	lm	ll	lm	lm	lm	lm	lm	ll	--	lm	ll	ll	ll	lm	lm	ll	lm	ll	lm	lm	ll	lm	--	--	ll	lm	lm	lm	lm	ll	lm	lm	lm	ll	lm	ll	lm	lm	lm
1279	LG6	M51464	24.569	lm	ll	ll	ll	ll	lm	lm	ll	lm	lm	lm	lm	lm	lm	lm	--	ll	lm	lm	lm	lm	ll	lm	lm	lm	lm	ll	lm	lm	ll	ll	lm	lm	lm	ll	ll	lm	lm	ll	lm	lm	lm	lm	lm	lm	lm
1280	LG6	M05659	24.796	lm	ll	lm	lm	lm	lm	lm	lm	ll	lm	lm	lm	lm	lm	ll	--	lm	ll	ll	ll	lm	lm	ll	lm	ll	lm	lm	ll	lm	--	--	ll	lm	lm	lm	lm	ll	lm	lm	lm	--	lm	lm	lm	lm	lm
1281	LG6	M12400	25.04	hk	hk	kk	hk	kk	hk	kk	kk	hh	hk	hk	hk	hk	hk	hh	hk	kk	hh	hk	hh	hk	kk	hh	hk	hh	hk	kk	hh	hk	hk	hk	hh	hk	hk	kk	kk	hh	hk	kk	hk	hh	hk	hh	hk	hk	hk
1282	LG6	M01531	25.485	lm	ll	lm	lm	lm	lm	lm	lm	ll	lm	lm	--	lm	lm	ll	lm	lm	ll	ll	ll	lm	lm	ll	lm	ll	lm	ll	ll	--	lm	lm	ll	--	lm	lm	lm	ll	--	lm	lm	ll	lm	ll	--	--	--
1283	LG6	M04735	26.858	hk	hk	hk	kk	kk	hk	kk	kk	hh	hk	hk	hh	hk	--	hh	hk	kk	hh	hh	hh	hk	kk	hh	hk	hh	hh	hk	hh	hk	kk	--	hh	--	hk	kk	kk	--	hk	kk	hk	hh	k-	hh	hk	kk	hk
1284	LG6	M53935	27.826	hk	hk	hk	hh	hh	hk	hh	hh	kk	hk	hk	hk	hk	hk	kk	hk	hh	kk	kk	kk	hk	hh	kk	hk	kk	hk	hk	kk	hk	hk	hk	kk	hk	hk	hh	hh	kk	hk	hh	hk	kk	hk	kk	hk	hk	hk
1285	LG6	M02540	28.608	lm	ll	ll	lm	ll	lm	ll	ll	lm	lm	--	lm	--	lm	lm	lm	ll	--	lm	lm	--	ll	lm	lm	lm	lm	--	lm	--	lm	--	lm	lm	lm	ll	ll	--	lm	ll	lm	lm	lm	lm	lm	lm	--
1286	LG6	M01056	29.478	hk	hk	kk	kk	kk	hk	kk	kk	hk	k-	hk	hk	hk	hk	hk	hk	kk	hh	hk	hk	hk	kk	hh	hk	hk	hk	hk	hk	hk	k-	hk	hk	k-	hk	kk	kk	h-	hk	kk	hk	hh	k-	hk	hk	k-	hk
1287	LG6	M08661	31.256	lm	ll	lm	lm	lm	lm	lm	lm	ll	lm	lm	ll	ll	ll	ll	ll	--	ll	ll	ll	lm	lm	ll	ll	ll	ll	lm	ll	ll	lm	--	ll	ll	ll	lm	lm	ll	ll	lm	lm	ll	ll	ll	lm	ll	ll
1288	LG6	M72191	32.846	lm	ll	--	ll	lm	lm	--	lm	ll	--	--	ll	ll	--	ll	ll	--	--	ll	ll	--	lm	ll	ll	ll	ll	lm	ll	ll	lm	lm	ll	ll	ll	lm	lm	--	ll	lm	--	ll	ll	ll	lm	ll	ll
1289	LG6	M53802	33.417	lm	ll	--	--	lm	lm	lm	lm	ll	lm	lm	lm	ll	ll	ll	ll	lm	--	ll	ll	lm	lm	ll	ll	ll	ll	lm	ll	ll	lm	lm	ll	ll	ll	lm	lm	ll	ll	lm	lm	ll	ll	ll	lm	ll	ll
1290	LG6	M57995	35.35	lm	ll	lm	lm	ll	--	lm	ll	ll	lm	lm	--	ll	ll	ll	ll	--	ll	ll	ll	--	ll	ll	--	ll	ll	ll	ll	ll	--	ll	ll	ll	ll	ll	ll	ll	ll	--	ll	ll	--	ll	lm	ll	ll
1291	LG6	M54111	37.388	lm	ll	lm	lm	ll	lm	lm	lm	ll	--	lm	lm	ll	ll	ll	ll	lm	--	ll	ll	lm	lm	ll	ll	ll	ll	lm	ll	ll	ll	lm	ll	ll	ll	lm	lm	--	ll	lm	lm	ll	ll	--	lm	ll	ll
1292	LG6	M02967	38.332	lm	ll	lm	--	ll	lm	lm	lm	ll	lm	lm	lm	ll	ll	ll	ll	lm	ll	ll	ll	lm	lm	ll	ll	ll	ll	lm	ll	ll	ll	lm	ll	ll	ll	lm	lm	ll	ll	lm	lm	ll	ll	ll	lm	ll	ll
1293	LG6	cms13306	39.305	lm	ll	lm	ll	ll	lm	lm	lm	ll	lm	lm	lm	ll	ll	ll	ll	lm	ll	ll	ll	lm	lm	ll	ll	--	ll	lm	ll	ll	lm	lm	ll	ll	ll	lm	lm	ll	ll	lm	lm	ll	--	ll	lm	ll	ll
1294	LG6	M62077	40.33	lm	ll	lm	lm	ll	lm	lm	lm	ll	lm	lm	lm	ll	ll	ll	ll	ll	ll	ll	ll	lm	lm	ll	ll	ll	ll	lm	ll	ll	--	lm	ll	ll	ll	lm	lm	ll	ll	lm	lm	ll	ll	ll	lm	ll	ll
1295	LG6	M53318	41.495	nn	np	--	--	nn	np	np	np	nn	np	np	np	nn	nn	nn	nn	np	nn	nn	nn	--	--	nn	nn	nn	nn	np	nn	nn	nn	np	--	nn	nn	--	np	nn	nn	nn	--	nn	nn	nn	np	nn	nn
1296	LG6	M71118	41.516	lm	ll	--	--	ll	lm	--	lm	ll	--	--	--	ll	--	ll	ll	ll	ll	ll	ll	--	lm	--	ll	ll	ll	lm	ll	ll	ll	--	lm	--	ll	lm	lm	--	ll	lm	lm	ll	ll	ll	--	ll	ll
1297	LG6	M69886	41.816	lm	ll	lm	lm	ll	lm	lm	lm	ll	lm	lm	lm	ll	ll	ll	ll	--	ll	ll	ll	lm	lm	ll	ll	ll	ll	lm	ll	ll	ll	lm	lm	ll	ll	lm	--	ll	ll	lm	lm	ll	ll	ll	lm	ll	ll
1298	LG6	M09031	45.084	lm	ll	lm	--	ll	lm	lm	lm	ll	ll	lm	lm	ll	ll	ll	ll	lm	ll	ll	ll	lm	lm	ll	lm	ll	ll	lm	ll	ll	ll	lm	lm	ll	ll	lm	lm	ll	ll	--	lm	ll	ll	ll	lm	ll	ll
1299	LG6	M03285	45.088	lm	ll	lm	--	ll	lm	lm	lm	ll	ll	lm	lm	ll	ll	ll	ll	lm	ll	ll	ll	lm	lm	ll	lm	ll	ll	lm	ll	ll	ll	lm	lm	ll	ll	lm	lm	ll	ll	--	lm	ll	ll	ll	lm	ll	ll
1300	LG6	M06507	46.943	lm	ll	lm	--	ll	lm	lm	ll	ll	lm	lm	lm	ll	ll	ll	ll	lm	ll	ll	ll	lm	lm	ll	lm	ll	ll	lm	--	ll	ll	lm	lm	ll	ll	lm	lm	ll	ll	lm	lm	ll	ll	ll	lm	ll	ll
1301	LG6	M53248	48.945	lm	ll	lm	lm	ll	lm	--	ll	ll	ll	lm	lm	ll	--	ll	ll	lm	--	ll	ll	lm	lm	ll	lm	ll	ll	lm	ll	ll	--	lm	lm	ll	ll	ll	lm	ll	ll	lm	lm	ll	ll	ll	lm	ll	ll
1302	LG6	M69665	50.308	lm	ll	lm	lm	ll	lm	lm	ll	ll	lm	lm	lm	ll	ll	ll	ll	lm	--	ll	ll	--	lm	ll	--	ll	ll	lm	ll	ll	--	lm	lm	--	ll	ll	lm	ll	ll	--	--	lm	ll	ll	lm	--	ll
1303	LG6	M07361	52.574	lm	ll	ll	lm	ll	lm	lm	ll	ll	lm	lm	--	ll	--	ll	ll	lm	ll	ll	ll	lm	lm	ll	lm	ll	ll	lm	ll	ll	lm	lm	--	ll	ll	ll	lm	ll	ll	lm	lm	lm	lm	ll	--	ll	ll
1304	LG6	M00544	53.434	lm	ll	lm	lm	ll	lm	lm	--	ll	--	lm	--	ll	ll	ll	ll	lm	ll	ll	ll	lm	lm	ll	lm	ll	ll	--	ll	ll	--	--	lm	--	ll	ll	--	ll	ll	lm	lm	lm	lm	ll	lm	ll	ll
1305	LG6	M01416	54.4	lm	ll	lm	--	ll	lm	lm	ll	ll	lm	lm	lm	ll	ll	ll	ll	lm	ll	ll	ll	lm	lm	ll	lm	ll	ll	lm	ll	ll	lm	--	lm	ll	ll	ll	lm	ll	ll	lm	lm	lm	lm	ll	lm	ll	ll
1306	LG6	M66220	56.599	lm	ll	--	ll	ll	lm	lm	ll	ll	lm	lm	ll	ll	ll	lm	ll	lm	ll	ll	ll	lm	lm	ll	lm	ll	lm	lm	lm	ll	lm	lm	lm	--	ll	--	lm	--	ll	lm	lm	lm	--	--	lm	lm	lm
1307	LG6	M55182	57.637	lm	ll	lm	lm	ll	lm	lm	ll	ll	lm	lm	lm	ll	ll	ll	ll	lm	--	ll	ll	lm	lm	ll	lm	ll	lm	lm	ll	ll	lm	lm	lm	ll	ll	ll	lm	ll	ll	lm	lm	lm	lm	ll	lm	lm	ll
1308	LG6	cms13286	58.621	lm	ll	lm	lm	ll	lm	lm	ll	ll	lm	lm	lm	ll	ll	ll	ll	lm	ll	ll	ll	lm	lm	ll	lm	ll	lm	lm	ll	ll	lm	lm	lm	ll	ll	ll	lm	ll	ll	lm	--	lm	--	ll	lm	lm	ll
1309	LG6	M60464	59.413	nn	np	np	nn	nn	nn	np	nn	nn	nn	--	--	nn	nn	--	nn	np	nn	nn	nn	np	np	nn	np	nn	--	np	--	nn	np	np	np	nn	nn	nn	np	nn	nn	nn	nn	np	np	nn	np	np	nn
1310	LG6	M12060	59.628	lm	ll	lm	lm	ll	lm	lm	ll	ll	lm	lm	lm	ll	ll	ll	ll	--	--	ll	ll	lm	lm	ll	lm	ll	lm	lm	ll	ll	lm	--	lm	ll	ll	ll	lm	ll	ll	lm	ll	lm	lm	--	--	lm	ll
1311	LG6	M58753	60.712	lm	ll	lm	--	ll	ll	ll	ll	--	lm	lm	ll	--	lm	lm	--	lm	ll	ll	ll	lm	lm	--	lm	ll	lm	lm	lm	--	lm	--	lm	ll	lm	--	lm	ll	ll	lm	lm	lm	lm	ll	lm	lm	ll
1312	LG6	cms13370	62.243	lm	ll	lm	lm	ll	lm	lm	ll	ll	lm	lm	lm	ll	ll	ll	ll	lm	ll	ll	ll	lm	lm	ll	lm	ll	lm	lm	lm	ll	lm	lm	lm	ll	ll	ll	lm	ll	ll	lm	lm	lm	lm	ll	lm	lm	ll
1313	LG6	M56267	63.349	lm	ll	lm	--	ll	lm	--	ll	ll	lm	lm	lm	ll	ll	--	ll	lm	ll	ll	ll	ll	--	ll	lm	ll	lm	lm	lm	ll	ll	lm	lm	ll	ll	ll	lm	ll	ll	--	lm	lm	lm	ll	lm	lm	ll
1314	LG6	M54335	63.87	lm	ll	--	lm	ll	lm	lm	--	ll	--	lm	lm	ll	ll	lm	ll	lm	--	ll	ll	--	lm	ll	lm	ll	lm	lm	lm	ll	lm	lm	lm	--	ll	ll	lm	ll	ll	lm	--	lm	lm	ll	lm	lm	ll
1315	LG6	M60471	63.989	nn	np	np	nn	nn	nn	np	nn	nn	nn	np	np	--	nn	np	nn	np	--	nn	nn	np	np	--	np	nn	--	np	--	nn	np	np	np	nn	nn	nn	np	--	nn	nn	nn	np	np	nn	np	np	nn
1316	LG6	M63653	65.683	lm	ll	lm	--	ll	lm	lm	--	ll	--	lm	lm	ll	ll	lm	ll	lm	lm	ll	ll	lm	lm	ll	lm	ll	lm	lm	ll	ll	--	lm	lm	ll	ll	ll	lm	--	ll	lm	lm	lm	lm	ll	lm	lm	ll
1317	LG6	M02824	66.757	lm	ll	lm	lm	ll	--	lm	ll	ll	lm	lm	lm	ll	ll	lm	ll	lm	ll	ll	ll	lm	lm	ll	lm	ll	lm	lm	lm	ll	lm	lm	lm	ll	ll	ll	lm	ll	ll	lm	lm	lm	lm	ll	lm	lm	ll
1318	LG6	M01673	67.013	lm	ll	lm	lm	ll	--	lm	ll	ll	lm	lm	lm	ll	ll	lm	ll	lm	ll	ll	ll	lm	lm	ll	lm	ll	lm	lm	lm	ll	lm	lm	lm	ll	ll	ll	lm	ll	ll	lm	lm	lm	lm	ll	lm	lm	ll
1319	LG6	M02650	67.595	lm	ll	lm	lm	ll	lm	lm	ll	ll	lm	lm	lm	ll	ll	lm	ll	lm	ll	ll	ll	lm	lm	ll	lm	ll	lm	lm	lm	ll	lm	lm	lm	ll	ll	ll	lm	ll	ll	lm	lm	lm	lm	ll	lm	lm	ll
1320	LG6	M61745	68.089	lm	ll	lm	lm	ll	lm	lm	ll	ll	--	lm	lm	ll	ll	lm	ll	--	--	ll	ll	lm	lm	ll	lm	ll	lm	lm	lm	ll	--	--	lm	ll	ll	ll	lm	--	ll	lm	lm	lm	lm	ll	lm	lm	ll
1321	LG6	M58279	68.637	lm	ll	lm	lm	ll	lm	lm	ll	ll	--	lm	lm	ll	ll	lm	ll	lm	ll	ll	ll	lm	lm	ll	lm	ll	lm	lm	lm	ll	lm	lm	lm	ll	ll	ll	lm	--	ll	lm	lm	lm	lm	ll	lm	lm	ll
1322	LG6	M05333	69.957	lm	ll	lm	lm	ll	lm	lm	ll	ll	lm	--	lm	ll	ll	lm	ll	lm	--	ll	ll	lm	lm	ll	lm	ll	lm	ll	lm	ll	lm	lm	lm	ll	ll	ll	lm	--	ll	lm	lm	lm	lm	ll	lm	lm	ll
1323	LG6	M10387	70.525	lm	ll	lm	lm	ll	--	lm	ll	ll	lm	--	lm	ll	ll	lm	ll	lm	ll	ll	ll	lm	lm	ll	lm	ll	lm	ll	lm	ll	lm	lm	lm	ll	ll	ll	lm	--	ll	lm	lm	lm	lm	ll	lm	lm	ll
1324	LG6	M07789	70.674	lm	ll	--	lm	ll	--	lm	ll	ll	lm	--	lm	ll	ll	lm	ll	lm	ll	ll	ll	lm	lm	ll	lm	ll	lm	ll	lm	ll	lm	lm	lm	ll	ll	ll	lm	--	ll	lm	lm	lm	lm	ll	lm	lm	ll
1325	LG6	M06707	71.558	lm	ll	lm	lm	ll	lm	--	ll	ll	lm	lm	lm	ll	--	lm	ll	lm	--	ll	ll	lm	lm	ll	lm	ll	lm	--	lm	ll	--	--	lm	ll	ll	ll	lm	ll	ll	lm	--	--	lm	--	lm	lm	ll
1326	LG6	M61601	72.391	lm	ll	lm	lm	ll	lm	--	ll	lm	lm	lm	lm	ll	ll	lm	ll	lm	ll	ll	ll	lm	lm	ll	lm	ll	lm	ll	lm	ll	--	--	lm	ll	ll	ll	--	ll	ll	lm	lm	lm	lm	ll	lm	lm	ll
1327	LG6	M54912	73.089	lm	ll	lm	lm	ll	lm	lm	ll	lm	--	lm	lm	ll	ll	lm	ll	lm	ll	ll	ll	lm	lm	ll	lm	ll	lm	lm	lm	ll	lm	--	lm	ll	ll	ll	--	ll	ll	lm	--	lm	lm	ll	lm	lm	ll
1328	LG6	M63229	73.943	lm	ll	--	--	ll	lm	lm	ll	lm	lm	lm	ll	ll	ll	lm	ll	--	ll	ll	ll	lm	lm	ll	lm	ll	lm	lm	lm	ll	lm	lm	lm	ll	ll	ll	lm	ll	ll	lm	lm	lm	lm	ll	lm	lm	ll
1329	LG6	M63227	74.339	lm	ll	--	lm	ll	lm	lm	ll	lm	lm	lm	ll	ll	ll	lm	ll	--	ll	ll	ll	lm	lm	ll	lm	ll	lm	lm	lm	ll	lm	lm	lm	ll	ll	ll	lm	ll	ll	lm	lm	lm	lm	ll	lm	lm	ll
1330	LG6	M10494	75.202	lm	ll	lm	lm	ll	lm	lm	ll	lm	ll	lm	ll	ll	ll	lm	ll	ll	ll	ll	ll	lm	lm	ll	lm	ll	lm	lm	lm	ll	lm	--	lm	ll	--	ll	lm	ll	ll	lm	lm	lm	lm	--	ll	lm	ll
1331	LG6	M03516	77.23	lm	ll	lm	--	ll	lm	lm	ll	lm	lm	lm	ll	ll	--	lm	ll	lm	ll	ll	ll	lm	lm	ll	lm	ll	lm	lm	lm	ll	lm	lm	lm	ll	ll	ll	lm	ll	ll	lm	--	lm	lm	ll	lm	lm	ll
1332	LG6	M62993	77.765	lm	ll	lm	--	ll	lm	lm	ll	lm	--	lm	ll	--	ll	lm	ll	lm	ll	ll	ll	lm	lm	ll	lm	ll	lm	lm	lm	ll	lm	--	lm	ll	ll	ll	lm	ll	ll	lm	lm	lm	lm	ll	lm	lm	ll
1333	LG6	M11024	79.551	lm	ll	lm	--	ll	lm	lm	ll	lm	--	lm	ll	ll	ll	lm	ll	lm	ll	ll	ll	lm	lm	ll	lm	ll	lm	lm	lm	ll	ll	lm	lm	ll	ll	ll	lm	ll	lm	lm	lm	lm	lm	ll	lm	lm	ll
1334	LG6	M00984	80.064	lm	ll	lm	--	ll	lm	lm	ll	lm	--	lm	ll	ll	ll	lm	ll	lm	ll	ll	ll	lm	lm	ll	lm	ll	lm	lm	lm	ll	lm	lm	lm	ll	ll	ll	lm	ll	lm	lm	lm	lm	lm	ll	lm	lm	ll
1335	LG6	M06643	80.972	lm	ll	lm	--	ll	lm	lm	ll	lm	--	lm	ll	ll	ll	lm	ll	lm	ll	ll	ll	lm	lm	lm	lm	ll	lm	lm	lm	ll	ll	lm	lm	ll	ll	ll	lm	ll	lm	lm	--	lm	lm	ll	lm	lm	ll
1336	LG6	M07702	82.053	nn	np	np	np	nn	np	np	nn	np	--	nn	nn	nn	--	np	nn	np	--	nn	nn	np	np	nn	np	nn	np	--	np	nn	nn	np	np	nn	nn	nn	np	nn	nn	np	np	np	np	--	np	np	nn
1337	LG6	M69927	82.218	lm	ll	lm	lm	ll	lm	lm	--	lm	--	lm	ll	ll	--	lm	ll	lm	lm	ll	ll	lm	lm	lm	lm	ll	lm	lm	lm	ll	lm	--	--	ll	ll	ll	lm	ll	lm	lm	--	lm	lm	ll	lm	lm	ll
1338	LG6	M55287	83.392	lm	ll	lm	--	lm	lm	lm	ll	lm	ll	lm	ll	ll	ll	lm	ll	lm	--	ll	ll	lm	lm	lm	lm	ll	lm	lm	lm	ll	ll	--	lm	ll	ll	ll	ll	ll	lm	lm	--	lm	lm	ll	lm	lm	ll
1339	LG6	M55284	83.442	lm	ll	lm	--	lm	lm	lm	ll	lm	ll	lm	ll	ll	ll	lm	ll	lm	--	ll	ll	lm	lm	lm	lm	ll	lm	lm	lm	ll	ll	--	lm	ll	ll	ll	ll	ll	lm	lm	--	lm	lm	ll	lm	lm	ll
1340	LG6	M00735	84.943	lm	ll	lm	--	lm	lm	--	ll	lm	lm	lm	ll	ll	ll	lm	ll	lm	lm	ll	ll	lm	lm	lm	lm	ll	lm	lm	lm	ll	lm	lm	lm	ll	ll	ll	ll	ll	lm	lm	lm	lm	lm	ll	lm	lm	ll
1341	LG6	M73341	86.363	lm	ll	lm	--	lm	lm	lm	ll	lm	--	lm	ll	ll	ll	lm	ll	lm	--	ll	ll	lm	lm	lm	lm	ll	lm	lm	lm	ll	lm	lm	lm	ll	ll	ll	ll	ll	lm	lm	lm	lm	lm	ll	lm	lm	ll
1342	LG6	M71146	86.753	lm	ll	lm	lm	lm	lm	lm	--	lm	lm	lm	ll	--	--	lm	ll	lm	--	ll	ll	lm	lm	lm	lm	ll	lm	lm	lm	ll	--	lm	lm	ll	ll	ll	ll	ll	lm	lm	lm	lm	lm	ll	lm	lm	ll
1343	LG6	M00237	87.336	lm	ll	lm	lm	lm	lm	lm	ll	lm	--	lm	ll	ll	ll	lm	ll	lm	lm	ll	ll	lm	lm	lm	lm	ll	lm	lm	lm	ll	lm	ll	lm	ll	ll	ll	ll	ll	lm	lm	lm	lm	lm	ll	lm	lm	ll
1344	LG6	M11481	87.716	lm	ll	lm	lm	lm	lm	lm	ll	lm	--	lm	ll	ll	ll	lm	ll	lm	lm	ll	ll	lm	lm	lm	lm	ll	lm	lm	lm	ll	lm	lm	lm	ll	ll	ll	ll	ll	lm	lm	lm	lm	lm	ll	lm	lm	ll
1345	LG6	M03775	88.191	lm	ll	lm	lm	lm	lm	lm	ll	lm	--	lm	ll	ll	ll	lm	ll	lm	lm	ll	ll	lm	lm	lm	lm	ll	lm	lm	lm	ll	lm	ll	lm	ll	ll	ll	ll	ll	lm	lm	lm	lm	lm	ll	lm	lm	ll
1346	LG6	M07348	88.738	lm	ll	--	lm	lm	lm	lm	ll	lm	--	lm	ll	ll	ll	lm	ll	lm	ll	ll	ll	lm	lm	lm	lm	ll	lm	lm	lm	ll	--	lm	lm	ll	ll	ll	ll	ll	lm	lm	lm	--	lm	ll	lm	lm	ll
1347	LG6	M10589	89.175	lm	ll	lm	lm	lm	lm	lm	ll	lm	--	lm	ll	ll	ll	lm	ll	lm	--	ll	ll	lm	lm	lm	lm	ll	lm	lm	lm	ll	lm	lm	lm	ll	ll	ll	ll	ll	lm	lm	--	lm	lm	ll	lm	lm	ll
1348	LG6	M04620	90.686	lm	ll	lm	lm	lm	lm	lm	ll	lm	--	lm	ll	ll	ll	lm	lm	lm	--	ll	ll	lm	lm	--	lm	ll	lm	lm	lm	ll	lm	--	--	ll	ll	ll	ll	ll	lm	lm	lm	lm	lm	--	--	lm	ll
1349	LG6	M01222	90.734	lm	ll	lm	lm	lm	lm	lm	ll	lm	--	lm	ll	ll	ll	lm	lm	lm	--	ll	ll	lm	lm	--	lm	ll	lm	lm	lm	ll	lm	--	lm	ll	ll	ll	ll	ll	lm	lm	lm	lm	lm	lm	lm	lm	ll
1350	LG6	M68669	91.436	lm	ll	--	lm	lm	--	lm	ll	lm	lm	lm	ll	ll	ll	lm	ll	lm	--	ll	ll	lm	lm	--	--	ll	--	lm	lm	ll	ll	lm	--	ll	ll	ll	ll	ll	--	lm	lm	lm	--	ll	lm	lm	ll
1351	LG6	M54032	92.589	lm	ll	lm	--	lm	lm	lm	ll	lm	lm	lm	ll	ll	ll	lm	lm	lm	--	ll	ll	lm	lm	lm	lm	ll	lm	lm	lm	ll	lm	--	lm	ll	ll	ll	ll	ll	lm	lm	lm	lm	lm	lm	lm	lm	ll
1352	LG6	M06892	93.37	lm	ll	lm	lm	lm	ll	--	ll	lm	lm	lm	ll	ll	lm	lm	ll	--	--	ll	ll	--	lm	--	ll	ll	lm	lm	--	ll	lm	lm	lm	ll	ll	ll	ll	ll	--	lm	--	--	--	--	lm	lm	ll
1353	LG6	M05511	94.527	lm	ll	lm	lm	lm	lm	lm	ll	lm	lm	lm	lm	ll	lm	lm	lm	lm	--	lm	lm	lm	ll	lm	lm	lm	lm	ll	lm	lm	lm	lm	lm	ll	ll	lm	ll	lm	--	lm	--	lm	lm	lm	lm	lm	lm
1354	LG6	M68076	94.87	lm	ll	lm	lm	lm	lm	lm	ll	lm	lm	lm	ll	ll	ll	lm	lm	lm	--	ll	ll	lm	lm	lm	lm	lm	lm	ll	lm	ll	lm	lm	lm	ll	ll	ll	ll	--	--	lm	lm	lm	ll	lm	lm	lm	ll
1355	LG6	M03905	97.206	lm	ll	lm	--	lm	lm	lm	ll	lm	--	lm	ll	ll	ll	lm	lm	lm	--	ll	ll	lm	lm	lm	lm	lm	lm	ll	lm	ll	lm	lm	lm	ll	ll	ll	ll	ll	lm	lm	ll	lm	ll	lm	lm	ll	ll
1356	LG6	M56502	97.539	lm	ll	lm	--	lm	lm	--	ll	lm	lm	lm	ll	ll	ll	lm	--	--	lm	ll	ll	lm	lm	lm	lm	lm	lm	ll	lm	ll	lm	--	lm	ll	ll	ll	ll	ll	lm	lm	lm	lm	ll	lm	lm	lm	ll
1357	LG6	M03468	97.892	lm	ll	lm	--	lm	lm	lm	ll	lm	lm	lm	ll	ll	lm	lm	lm	lm	lm	ll	ll	lm	lm	lm	lm	lm	lm	ll	lm	ll	lm	lm	lm	ll	ll	ll	ll	ll	lm	lm	lm	lm	ll	lm	lm	lm	ll
1358	LG6	M07330	98.194	nn	np	nn	nn	nn	nn	nn	np	nn	nn	nn	np	np	np	nn	nn	nn	nn	np	np	nn	nn	nn	nn	np	nn	nn	nn	np	nn	nn	nn	np	np	np	np	np	nn	nn	nn	nn	nn	np	nn	nn	np
1359	LG6	M68231	98.239	lm	ll	lm	lm	lm	lm	lm	ll	lm	lm	lm	ll	ll	ll	lm	lm	lm	lm	ll	ll	lm	lm	lm	lm	lm	lm	ll	lm	ll	lm	lm	lm	ll	ll	ll	ll	ll	lm	lm	lm	lm	ll	lm	lm	lm	ll
1360	LG6	M52947	99.237	lm	ll	lm	lm	lm	lm	lm	ll	lm	lm	ll	ll	ll	ll	lm	lm	lm	--	ll	ll	lm	lm	lm	lm	lm	lm	ll	lm	ll	lm	lm	lm	ll	ll	ll	ll	ll	lm	lm	lm	lm	ll	lm	lm	lm	ll
1361	LG6	M63215	100.551	lm	ll	ll	--	lm	lm	lm	ll	lm	lm	ll	ll	ll	ll	ll	ll	ll	--	ll	ll	ll	ll	ll	ll	ll	lm	ll	lm	ll	lm	lm	lm	--	ll	ll	ll	ll	ll	ll	--	ll	ll	ll	ll	--	ll
1362	LG6	M00029	100.692	lm	ll	lm	lm	lm	lm	lm	ll	lm	lm	ll	ll	ll	ll	lm	lm	lm	lm	ll	ll	lm	lm	lm	lm	lm	lm	ll	lm	ll	lm	lm	lm	--	ll	ll	--	--	lm	lm	lm	lm	--	lm	lm	lm	ll
1363	LG6	M03351	100.97	lm	ll	lm	--	lm	lm	lm	ll	lm	lm	ll	ll	ll	ll	lm	lm	lm	lm	ll	ll	lm	lm	lm	lm	lm	lm	ll	lm	ll	lm	lm	lm	ll	ll	ll	ll	ll	lm	lm	lm	lm	ll	lm	lm	lm	ll
1364	LG6	M12560	101.186	lm	ll	lm	--	lm	lm	lm	ll	lm	lm	ll	ll	ll	ll	lm	lm	lm	lm	ll	ll	lm	lm	lm	lm	lm	lm	ll	lm	ll	lm	lm	lm	ll	ll	ll	ll	ll	lm	lm	lm	lm	ll	lm	lm	lm	ll
1365	LG6	M69831	101.528	lm	ll	lm	--	lm	lm	lm	ll	lm	--	ll	ll	ll	ll	lm	lm	lm	lm	ll	ll	lm	lm	lm	lm	lm	lm	--	lm	ll	lm	lm	lm	ll	ll	ll	ll	ll	lm	lm	lm	lm	ll	lm	lm	lm	ll
1366	LG6	M08008	102.14	lm	ll	lm	--	lm	lm	lm	ll	lm	lm	ll	ll	ll	ll	lm	lm	lm	lm	ll	ll	lm	lm	lm	lm	lm	lm	--	lm	ll	lm	lm	lm	ll	ll	ll	ll	ll	lm	lm	lm	lm	ll	lm	lm	lm	ll
1367	LG6	M09238	104.212	hk	hk	hk	hh	hh	hh	hh	kk	hk	hk	kk	kk	hk	hk	hk	hh	hh	--	kk	kk	hh	hk	hk	hh	hk	h-	kk	hh	kk	hh	hh	hk	hk	kk	hk	hk	--	hh	hh	hh	hk	hk	hk	hk	hh	hk
1368	LG6	M09651	105.679	lm	ll	lm	lm	lm	lm	lm	ll	lm	--	ll	ll	lm	--	lm	lm	lm	lm	ll	ll	lm	lm	--	lm	--	lm	ll	lm	ll	lm	--	--	ll	ll	lm	lm	ll	lm	lm	lm	--	lm	ll	--	lm	--
1369	LG6	M03412	105.85	lm	ll	lm	lm	lm	lm	lm	ll	lm	lm	ll	ll	lm	--	lm	lm	lm	lm	ll	ll	lm	lm	lm	lm	lm	lm	ll	lm	ll	lm	lm	lm	--	ll	lm	lm	ll	lm	lm	lm	lm	lm	ll	lm	lm	lm
1370	LG6	M06108	106.529	lm	ll	--	ll	ll	ll	ll	lm	lm	ll	lm	lm	lm	ll	lm	ll	ll	ll	lm	lm	ll	lm	lm	ll	lm	lm	lm	ll	lm	ll	ll	lm	lm	lm	lm	--	lm	ll	ll	ll	lm	--	lm	lm	ll	lm
1371	LG6	M01438	106.65	lm	ll	--	ll	ll	ll	ll	lm	lm	ll	lm	lm	lm	ll	lm	ll	ll	ll	lm	lm	ll	lm	lm	ll	lm	lm	lm	ll	lm	ll	ll	lm	lm	lm	lm	--	lm	ll	ll	ll	lm	--	lm	lm	ll	lm
1372	LG6	M10819	107.164	lm	ll	--	ll	ll	ll	ll	lm	lm	ll	lm	lm	lm	ll	lm	ll	ll	ll	lm	lm	ll	lm	lm	ll	lm	lm	lm	ll	lm	ll	ll	lm	lm	lm	lm	--	lm	ll	ll	ll	lm	--	lm	lm	ll	lm
1373	LG6	M02837	107.929	lm	ll	lm	lm	ll	ll	ll	--	lm	ll	lm	lm	lm	lm	lm	ll	ll	ll	lm	lm	ll	--	lm	ll	lm	--	lm	ll	lm	ll	ll	lm	lm	lm	lm	lm	lm	lm	ll	lm	--	lm	lm	ll	ll	lm
1374	LG6	M11666	108.078	lm	ll	lm	ll	ll	ll	ll	lm	lm	lm	lm	lm	lm	lm	lm	ll	ll	ll	lm	lm	ll	lm	lm	ll	lm	lm	lm	ll	lm	ll	ll	lm	lm	lm	lm	lm	lm	lm	ll	ll	lm	lm	--	lm	ll	lm
1375	LG6	M12193	108.225	hk	hk	hk	hk	hh	hh	hh	kk	hk	hk	kk	kk	hk	hk	hk	hh	hh	hh	kk	kk	hh	hk	hk	hh	hk	hk	kk	hh	kk	hh	hh	hk	hk	kk	hk	hk	kk	hk	hh	hk	hk	hk	hk	hk	hh	hk
1376	LG6	M04751	108.555	hk	hk	hk	hk	hh	hh	hh	kk	hk	hk	kk	kk	hk	hk	hk	hh	hh	hh	kk	kk	hh	hk	hk	hh	hk	hk	kk	hh	kk	hh	hh	hk	hk	kk	hk	hk	kk	hk	hh	hk	hk	hk	hk	hk	hh	hk
1377	LG6	M10723	109.353	lm	ll	lm	ll	ll	ll	--	lm	lm	--	lm	lm	lm	ll	lm	ll	ll	--	lm	lm	ll	lm	lm	ll	ll	--	lm	ll	lm	--	ll	lm	lm	lm	lm	lm	--	--	ll	ll	lm	lm	ll	lm	ll	lm
1378	LG6	M10401	109.596	hk	hk	h-	h-	kk	kk	kk	h-	h-	h-	h-	h-	h-	h-	h-	kk	kk	kk	h-	h-	kk	h-	h-	kk	h-	h-	h-	kk	h-	kk	kk	h-	h-	h-	h-	h-	h-	h-	kk	h-	h-	h-	h-	h-	kk	h-
1379	LG6	M07868	109.701	hk	hk	h-	h-	kk	kk	kk	h-	h-	h-	h-	h-	h-	h-	h-	kk	kk	kk	h-	h-	kk	h-	h-	kk	h-	h-	h-	kk	h-	kk	kk	h-	h-	h-	h-	h-	h-	h-	kk	h-	h-	h-	h-	h-	kk	h-
1380	LG6	M01090	110.612	hk	hk	hk	hk	kk	kk	kk	hh	hk	hk	hh	hh	hk	hk	hk	kk	kk	kk	hh	hh	kk	hk	hk	kk	hk	hk	hh	kk	hh	kk	kk	hk	hk	hh	hk	hk	hh	hk	kk	hk	hk	hk	hk	hk	kk	hk
1381	LG6	M09963	111.622	nn	np	np	np	np	np	np	nn	np	np	nn	nn	--	nn	np	np	np	np	nn	np	np	nn	np	np	np	np	nn	np	np	np	np	np	--	nn	--	nn	nn	--	np	np	np	np	np	np	np	np
1382	LG6	M00941	112.562	lm	ll	lm	lm	lm	lm	lm	ll	lm	lm	ll	ll	lm	ll	lm	lm	lm	lm	ll	lm	lm	ll	lm	lm	lm	lm	ll	lm	lm	lm	lm	lm	ll	ll	--	ll	ll	lm	lm	lm	--	lm	lm	lm	lm	lm
1383	LG6	M00817	113.166	lm	ll	--	lm	lm	lm	--	ll	--	ll	ll	ll	lm	ll	--	lm	lm	--	ll	lm	lm	ll	lm	lm	lm	lm	ll	lm	--	lm	lm	lm	--	ll	lm	ll	ll	--	lm	lm	ll	--	--	lm	lm	lm
1384	LG6	M08606	114.635	nn	np	--	nn	nn	nn	nn	np	np	np	np	np	np	np	np	nn	--	nn	np	np	nn	np	--	nn	nn	np	np	nn	np	nn	nn	nn	np	np	np	np	np	np	nn	nn	np	np	--	np	nn	np
1385	LG6	M05308	115.066	hk	hk	hk	hk	hh	hh	hh	kk	hk	hk	kk	kk	hk	kk	hk	hh	hh	hh	kk	hk	hh	kk	hk	hh	hh	hk	kk	hh	hk	hh	hh	hh	k-	kk	hk	kk	--	hk	hh	hk	hk	hk	hk	hk	hh	hk
1386	LG6	M68768	115.091	hk	hk	hk	hh	hh	hh	hh	kk	hk	hk	kk	kk	hk	hk	hk	hh	hh	h-	kk	h-	hh	kk	hk	hh	hh	hk	kk	hh	kk	hh	hh	hk	hk	kk	hk	hk	kk	hk	hh	hk	hk	hk	hk	hk	hh	hk
1387	LG6	M03267	115.11	hk	hk	hk	hh	hh	hh	hh	kk	hk	--	kk	kk	hk	kk	hh	hh	hh	--	kk	hk	hh	kk	hk	hh	hh	kk	kk	hh	hk	hh	hh	hh	hk	kk	hk	kk	hk	hk	hh	hk	hk	hk	hk	hk	hh	kk
1388	LG6	M53025	115.111	lm	ll	lm	ll	ll	ll	ll	lm	lm	lm	lm	lm	lm	lm	ll	ll	ll	ll	lm	lm	ll	lm	lm	ll	ll	lm	lm	ll	lm	ll	ll	ll	lm	--	lm	lm	--	lm	ll	ll	lm	lm	lm	lm	ll	lm
1389	LG6	M12254	115.556	lm	ll	lm	ll	ll	ll	ll	lm	lm	lm	lm	lm	lm	ll	lm	ll	ll	ll	lm	lm	ll	lm	lm	ll	ll	lm	lm	ll	lm	ll	ll	--	lm	lm	lm	lm	lm	lm	ll	lm	lm	lm	lm	lm	ll	lm
1390	LG6	M11967	115.71	hk	hk	hk	hk	hh	hh	hh	kk	hk	k-	kk	kk	hk	kk	hh	hh	hh	--	kk	hk	hh	kk	hk	hh	hh	kk	kk	hh	hk	hh	hh	hh	hk	kk	hk	kk	hk	hk	hh	kk	hk	hk	hk	hk	hh	kk
1391	LG6	M00118	115.821	lm	ll	--	lm	lm	ll	lm	--	lm	--	ll	ll	lm	ll	lm	lm	lm	--	ll	lm	lm	ll	--	lm	lm	ll	ll	lm	--	lm	ll	lm	lm	ll	ll	ll	--	--	--	lm	lm	--	--	ll	--	lm
1392	LG6	M07074	115.89	lm	ll	--	lm	lm	ll	lm	--	lm	--	ll	ll	lm	ll	lm	lm	lm	--	ll	lm	lm	ll	--	lm	lm	ll	ll	lm	--	lm	ll	lm	lm	ll	ll	ll	--	--	--	lm	lm	--	--	ll	--	lm
1393	LG6	M12612	116.188	lm	ll	--	lm	lm	ll	lm	--	lm	--	ll	ll	lm	ll	lm	lm	lm	--	ll	lm	lm	ll	--	lm	lm	ll	ll	lm	--	lm	ll	lm	lm	ll	ll	ll	--	--	--	lm	lm	--	--	ll	--	lm
1394	LG6	M00093	116.23	hk	hk	hk	hk	kk	kk	kk	hh	hk	hk	hh	hh	hk	hk	hk	kk	kk	--	hh	hk	kk	hh	k-	kk	kk	hk	hh	kk	hk	--	--	kk	hk	hh	hk	hh	--	hk	kk	kk	hh	hk	--	hk	--	hk
1395	LG6	M01774	116.42	lm	ll	--	lm	lm	lm	lm	--	lm	lm	ll	--	lm	ll	lm	lm	lm	ll	ll	lm	lm	ll	lm	lm	lm	lm	ll	lm	lm	lm	lm	lm	lm	ll	ll	ll	--	--	lm	lm	lm	lm	--	lm	lm	lm
1396	LG6	M03998	116.671	lm	ll	--	lm	lm	lm	lm	--	lm	lm	ll	--	lm	ll	lm	lm	lm	ll	ll	lm	lm	ll	lm	lm	lm	lm	ll	lm	lm	lm	lm	lm	lm	ll	ll	ll	--	--	lm	lm	lm	lm	--	lm	lm	lm
1397	LG6	M11207	117.144	lm	ll	--	ll	ll	ll	ll	lm	--	ll	lm	lm	--	lm	ll	ll	ll	ll	lm	lm	ll	lm	lm	ll	ll	lm	lm	ll	lm	ll	ll	ll	--	lm	lm	lm	lm	--	ll	--	--	lm	lm	lm	ll	lm
1398	LG6	M06314	117.288	hk	hk	h-	hh	hh	hh	hh	k-	hk	--	kk	kk	hk	kk	hh	hh	hh	hh	hk	k-	hh	kk	h-	hh	hh	kk	kk	hh	k-	hh	hh	hh	kk	kk	hk	kk	hk	hk	hh	hk	hk	hk	hk	hk	hh	kk
1399	LG6	M55632	117.632	hk	hk	h-	kk	kk	kk	kk	h-	--	h-	h-	h-	h-	h-	kk	kk	kk	kk	h-	h-	kk	h-	h-	kk	kk	h-	h-	kk	h-	kk	h-	kk	h-	h-	h-	h-	h-	--	kk	h-	h-	h-	h-	h-	kk	h-
1400	LG6	M08442	117.934	lm	ll	lm	--	ll	ll	ll	lm	--	ll	lm	lm	lm	lm	ll	ll	ll	ll	--	lm	ll	lm	lm	ll	ll	lm	lm	ll	--	ll	ll	ll	--	lm	lm	lm	lm	--	ll	--	lm	--	ll	lm	ll	lm
1401	LG6	M07149	118.382	hk	hk	hk	hh	hh	hh	hh	kk	hk	--	kk	kk	hk	kk	hk	hh	hh	hh	kk	hk	hh	kk	hk	hh	hh	hk	kk	hh	hk	hh	hh	hh	hk	kk	hk	kk	kk	hk	hh	hk	hk	hk	hk	hk	--	hk
1402	LG6	M02264	118.983	hk	hk	hk	hk	kk	kk	kk	hh	hk	hk	hh	hh	hk	hh	kk	kk	kk	kk	hh	hk	kk	hh	hk	kk	kk	hh	hh	kk	hk	--	kk	kk	hk	hh	hk	hh	hh	--	kk	hk	hk	hk	hk	hk	kk	hh
1403	LG6	M08763	119.824	hk	hk	hk	hk	h-	hh	h-	kk	hk	--	kk	kk	hk	kk	hk	hh	hk	hk	hk	hk	hh	kk	hk	hh	h-	kk	kk	hh	hk	hh	hk	hh	--	kk	hk	kk	hk	hk	hk	hk	hk	hk	h-	hk	h-	kk
1404	LG6	M07856	120.514	lm	ll	lm	lm	ll	ll	ll	lm	lm	lm	lm	lm	lm	lm	lm	ll	ll	ll	lm	lm	ll	lm	--	ll	ll	lm	lm	ll	lm	ll	ll	ll	lm	lm	lm	lm	lm	lm	ll	lm	lm	lm	lm	lm	ll	lm
1405	LG6	M05365	120.634	lm	ll	lm	lm	ll	ll	ll	lm	lm	lm	lm	lm	lm	lm	lm	ll	ll	ll	lm	lm	ll	lm	--	ll	ll	lm	lm	ll	lm	ll	ll	ll	lm	lm	lm	lm	lm	lm	ll	lm	lm	lm	lm	lm	ll	lm
1406	LG6	M08214	120.663	hk	hk	hk	kk	kk	kk	kk	hh	hk	hk	hh	hh	hk	--	hk	kk	kk	--	hh	hk	kk	hh	hk	kk	kk	hk	hh	kk	hk	--	kk	kk	hk	hh	hk	hh	hk	hk	kk	hk	hk	hk	hk	hk	kk	hk
1407	LG6	M08760	123.06	hk	hk	hk	hh	hh	hh	hh	kk	hk	k-	kk	kk	hk	kk	hh	hh	hh	hh	hk	hk	hh	kk	hk	hh	hh	kk	kk	hh	hk	hh	hh	hh	k-	kk	hk	kk	hk	hk	hh	hk	hk	hk	hk	hk	hh	kk
1408	LG6	M06888	123.304	lm	ll	lm	lm	lm	lm	lm	ll	lm	lm	ll	ll	lm	ll	lm	lm	lm	lm	lm	lm	lm	ll	lm	lm	lm	ll	ll	lm	lm	lm	lm	lm	lm	ll	lm	ll	--	lm	lm	lm	lm	lm	lm	lm	lm	ll
1409	LG6	M05004	123.402	hk	hk	hk	hk	hh	hh	hh	kk	hk	hk	kk	kk	hk	kk	hh	hh	hh	--	hk	hk	hh	kk	hk	hh	hh	kk	kk	hh	hk	hh	hh	hh	hk	kk	hk	kk	hk	hk	hh	hk	hk	hk	hk	hk	hh	kk
1410	LG6	M09394	123.719	hk	hk	hk	kk	kk	kk	kk	hh	hk	--	hh	hh	hk	hh	kk	kk	kk	kk	hk	hk	kk	hh	hk	kk	kk	hh	hh	kk	hk	kk	kk	kk	h-	hh	hk	hh	hk	hk	kk	hk	hk	hk	hk	hk	kk	hh
1411	LG6	M70063	124.062	lm	ll	lm	lm	lm	lm	lm	ll	lm	lm	ll	ll	lm	ll	lm	lm	lm	lm	lm	lm	lm	ll	lm	lm	lm	ll	ll	lm	lm	lm	lm	lm	lm	ll	lm	ll	lm	lm	lm	lm	lm	lm	lm	lm	lm	ll
1412	LG6	M70064	124.118	lm	ll	lm	lm	lm	lm	lm	ll	lm	lm	ll	ll	lm	ll	lm	lm	lm	lm	lm	lm	lm	ll	lm	lm	lm	ll	ll	lm	lm	lm	lm	lm	lm	ll	lm	ll	lm	lm	lm	lm	lm	lm	lm	lm	lm	ll
1413	LG6	M52748	127.47	lm	ll	ll	ll	lm	lm	lm	lm	ll	ll	lm	lm	lm	--	lm	ll	lm	lm	lm	lm	ll	lm	ll	ll	--	lm	lm	lm	lm	lm	--	lm	lm	lm	lm	--	lm	lm	lm	ll	ll	lm	ll	lm	lm	lm
1414	LG6	M55781	128.438	lm	ll	--	lm	lm	ll	lm	ll	lm	lm	ll	ll	ll	ll	lm	lm	--	--	lm	--	lm	ll	lm	lm	lm	ll	ll	lm	lm	--	lm	lm	ll	ll	ll	ll	--	lm	lm	lm	lm	lm	ll	lm	lm	ll
1415	LG6	M12274	128.997	lm	ll	lm	lm	lm	lm	lm	--	lm	ll	ll	ll	ll	ll	lm	lm	lm	lm	lm	--	lm	ll	lm	lm	lm	ll	ll	lm	lm	--	--	lm	--	ll	lm	ll	lm	ll	lm	lm	lm	--	ll	ll	lm	ll
1416	LG6	M68701	129.265	nn	np	nn	np	nn	np	np	np	nn	--	np	--	nn	--	np	nn	--	--	np	np	np	nn	nn	np	np	nn	nn	np	np	np	np	np	np	nn	--	nn	np	np	np	nn	nn	np	nn	nn	nn	nn
1417	LG6	M62330	129.405	hk	hk	hk	hk	hh	hh	hh	kk	hk	--	kk	kk	kk	kk	hh	hh	hh	hh	hk	hk	hh	kk	h-	hh	hh	kk	kk	hh	hk	hh	hh	hk	hk	kk	hk	kk	hk	hk	hk	hk	hk	hk	--	kk	hh	kk
1418	LG6	M62329	129.745	hk	hk	hk	kk	kk	kk	kk	hh	hk	--	hh	hh	hh	hh	kk	kk	kk	kk	hk	hk	kk	hh	k-	kk	kk	hh	hh	kk	hk	kk	kk	hk	hk	hh	hk	hh	hk	hk	hk	hk	hk	hk	--	hh	kk	hh
1419	LG6	M63129	130.319	nn	np	nn	nn	np	np	np	nn	nn	nn	nn	nn	nn	nn	np	np	np	np	np	np	np	nn	nn	np	np	nn	nn	np	np	--	np	np	np	nn	np	nn	np	np	np	nn	nn	np	nn	nn	np	nn
1420	LG6	M52826	131.359	hk	hk	kk	kk	hk	hk	hk	h-	kk	kk	hk	hk	hk	hk	hk	kk	hh	hk	hh	hh	hk	hk	kk	hk	hk	hk	hk	hk	hh	hk	hk	hh	hh	hk	hh	hk	hh	hh	hh	kk	kk	hh	kk	hk	hk	hk
1421	LG6	M64313	132.591	hk	hk	hh	hh	hk	hk	hk	hk	hh	--	hk	hk	hk	hk	hk	hh	--	--	kk	kk	hk	hk	hh	hk	hk	hk	hk	hk	kk	hk	hk	kk	kk	hk	kk	hk	kk	kk	kk	hh	hh	kk	hk	hk	hk	hk
1422	LG6	M68276	132.747	nn	np	nn	nn	nn	np	nn	nn	nn	nn	nn	nn	nn	nn	--	np	np	np	--	np	np	nn	nn	np	--	nn	nn	nn	np	--	--	np	--	nn	nn	nn	np	np	--	nn	nn	--	nn	nn	--	nn
1423	LG6	M05814	133.222	lm	ll	ll	ll	ll	ll	ll	lm	ll	ll	lm	lm	lm	--	ll	ll	lm	ll	--	lm	ll	lm	ll	ll	ll	lm	lm	ll	lm	ll	ll	lm	lm	lm	lm	lm	lm	--	--	ll	ll	lm	ll	lm	ll	lm
1424	LG6	M06247	133.249	lm	ll	lm	ll	ll	ll	ll	lm	lm	lm	lm	lm	lm	lm	ll	ll	lm	ll	lm	lm	ll	lm	ll	ll	ll	lm	lm	ll	lm	ll	ll	lm	--	lm	lm	lm	lm	lm	lm	--	lm	lm	lm	lm	ll	lm
1425	LG6	M02653	133.269	lm	ll	ll	ll	lm	lm	lm	ll	ll	--	lm	lm	--	--	lm	ll	lm	--	lm	lm	lm	lm	ll	lm	lm	lm	lm	lm	lm	lm	--	lm	lm	lm	lm	lm	lm	lm	lm	ll	ll	lm	lm	lm	lm	lm
1426	LG6	M04863	133.619	lm	ll	ll	ll	lm	lm	lm	ll	ll	--	lm	lm	--	--	--	ll	lm	--	lm	lm	lm	lm	ll	lm	lm	lm	lm	lm	lm	lm	--	lm	lm	lm	lm	lm	lm	lm	lm	ll	ll	lm	--	lm	lm	lm
1427	LG6	M67788	133.935	nn	np	nn	nn	np	np	np	nn	nn	--	nn	nn	nn	--	np	nn	np	--	np	np	np	nn	nn	np	np	nn	nn	np	np	--	np	np	np	nn	np	nn	np	np	np	nn	nn	np	nn	nn	np	nn
1428	LG6	M67790	134.382	nn	np	nn	nn	np	np	np	nn	nn	--	nn	nn	nn	--	np	nn	np	--	np	np	np	nn	nn	np	np	nn	nn	np	np	--	np	np	np	nn	np	nn	np	np	np	nn	nn	np	nn	nn	np	nn
1429	LG6	M50736	134.46	lm	ll	ll	ll	ll	ll	ll	lm	ll	ll	lm	lm	lm	lm	ll	ll	lm	ll	lm	lm	ll	lm	ll	ll	ll	lm	lm	ll	lm	ll	ll	lm	--	lm	lm	lm	ll	lm	lm	ll	ll	lm	ll	lm	ll	lm
1430	LG6	M50734	134.806	lm	ll	ll	ll	ll	ll	ll	lm	ll	ll	lm	lm	lm	lm	ll	ll	lm	ll	lm	lm	ll	lm	ll	ll	ll	lm	lm	ll	lm	ll	ll	lm	--	lm	lm	lm	ll	lm	lm	ll	ll	lm	ll	lm	ll	lm
1431	LG6	M53101	135.459	lm	ll	ll	ll	ll	ll	ll	lm	ll	--	lm	lm	lm	lm	--	lm	--	ll	lm	lm	ll	lm	ll	ll	ll	lm	lm	ll	lm	--	ll	lm	lm	lm	lm	lm	--	--	lm	--	ll	lm	ll	lm	ll	--
1432	LG6	M02320	135.843	nn	np	nn	np	np	np	np	nn	nn	nn	nn	nn	nn	nn	np	nn	np	np	np	np	np	nn	nn	np	np	nn	nn	np	np	np	np	np	--	nn	np	nn	np	np	np	nn	nn	np	nn	nn	--	nn
1433	LG6	M70867	137.64	nn	np	nn	np	np	np	--	nn	nn	--	nn	nn	nn	--	np	nn	--	np	np	np	--	nn	nn	np	np	nn	--	np	np	--	np	--	np	--	np	nn	--	np	np	nn	--	np	nn	nn	np	nn
1434	LG6	M64361	139.448	lm	ll	ll	ll	ll	ll	ll	lm	ll	ll	lm	lm	lm	lm	ll	ll	lm	ll	lm	lm	ll	lm	ll	ll	ll	lm	--	ll	lm	ll	ll	lm	ll	lm	lm	lm	ll	lm	lm	ll	ll	lm	ll	lm	ll	lm
1435	LG6	M11026	141.037	hk	hk	hh	hh	hh	hk	--	kk	hk	hh	kk	hh	hk	kk	hk	hh	kk	--	kk	kk	--	hk	hh	hh	hk	hk	hk	hh	kk	--	--	kk	kk	hk	kk	hk	kk	kk	kk	hh	hh	kk	hk	hk	hk	k-
1436	LG6	M05283	142.908	lm	ll	lm	ll	ll	ll	ll	lm	--	lm	lm	lm	lm	lm	ll	ll	ll	--	lm	lm	ll	lm	lm	ll	ll	lm	lm	ll	lm	ll	ll	lm	lm	lm	lm	lm	lm	ll	lm	lm	lm	ll	--	lm	ll	lm
1437	LG6	M55022	143.819	hk	hk	hh	hk	hh	hk	hk	hk	hh	hh	kk	hk	hk	hk	hk	hh	kk	--	kk	kk	hk	hk	hh	hk	hk	hk	hk	hk	kk	hk	hk	kk	kk	hk	kk	hk	kk	kk	kk	hh	hh	kk	--	hk	hk	hk
1438	LG6	M55024	143.827	hk	hk	kk	hk	kk	hk	hk	hk	kk	kk	hh	hk	hk	hk	hk	kk	hh	--	hh	hh	hk	hk	kk	hk	hk	hk	hk	hk	hh	hk	hk	hh	hh	hk	hh	hk	hh	hh	hh	kk	kk	hh	--	hk	hk	hk
1439	LG6	M55023	144.031	hk	hk	hh	hh	hh	hk	hk	hk	hh	hh	kk	hk	hk	hk	hk	hh	kk	--	kk	kk	hk	hk	hh	hk	hk	hk	hk	hk	kk	hk	hk	kk	kk	hk	kk	hk	kk	kk	kk	hh	hh	kk	--	hk	hk	hk
1440	LG6	M64739	144.4	nn	np	nn	np	nn	np	np	nn	nn	nn	np	nn	nn	nn	np	nn	--	nn	np	np	np	nn	nn	np	np	nn	nn	np	np	np	--	np	np	nn	np	nn	np	np	np	np	nn	np	nn	nn	np	nn
1441	LG6	M03967	146.079	nn	np	nn	nn	nn	np	np	nn	nn	nn	np	nn	nn	nn	np	nn	np	--	np	np	np	nn	--	np	np	nn	nn	np	np	--	--	np	np	nn	np	nn	np	np	np	nn	nn	np	nn	nn	np	--
1442	LG6	M01881	150.609	lm	ll	ll	ll	ll	lm	lm	lm	ll	--	lm	ll	lm	--	lm	ll	lm	--	lm	lm	lm	ll	ll	lm	lm	--	lm	lm	lm	--	lm	lm	lm	lm	lm	lm	ll	lm	lm	ll	ll	lm	ll	lm	lm	lm
1443	LG6	M00662	151.488	lm	ll	ll	lm	ll	lm	lm	lm	ll	--	lm	ll	lm	--	lm	ll	lm	--	lm	lm	lm	ll	ll	lm	lm	--	lm	lm	lm	--	lm	lm	lm	lm	lm	lm	ll	lm	lm	ll	ll	lm	ll	lm	lm	lm
1444	LG6	M12023	152.424	nn	np	nn	np	nn	np	--	nn	nn	nn	np	nn	nn	nn	np	nn	np	nn	np	np	np	nn	nn	np	np	nn	nn	nn	np	np	nn	np	np	nn	nn	nn	np	np	np	nn	nn	np	nn	nn	np	nn
1445	LG7	M00635	0	lm	ll	ll	ll	lm	ll	lm	--	lm	lm	lm	lm	ll	--	ll	lm	lm	--	lm	lm	lm	lm	ll	lm	lm	ll	lm	ll	lm	lm	lm	lm	ll	ll	--	lm	ll	ll	lm	lm	lm	--	ll	ll	lm	lm
1446	LG7	M11459	0.769	lm	ll	ll	ll	lm	ll	lm	--	lm	lm	lm	lm	--	--	ll	lm	lm	--	lm	lm	lm	lm	ll	lm	lm	ll	lm	ll	lm	lm	lm	lm	ll	ll	--	lm	ll	ll	lm	lm	--	--	ll	ll	lm	lm
1447	LG7	M10789	0.77	lm	ll	ll	ll	lm	ll	lm	--	lm	lm	lm	lm	--	--	ll	lm	lm	--	lm	lm	lm	lm	ll	lm	lm	ll	lm	ll	lm	lm	lm	lm	ll	ll	--	lm	ll	ll	lm	lm	lm	--	ll	ll	lm	lm
1448	LG7	M01257	0.806	lm	ll	ll	ll	lm	ll	lm	--	lm	lm	lm	lm	--	--	ll	lm	lm	--	lm	lm	lm	lm	ll	lm	lm	ll	lm	ll	lm	lm	lm	lm	ll	ll	--	lm	ll	ll	lm	lm	lm	--	ll	ll	lm	lm
1449	LG7	M08911	2.365	lm	ll	--	ll	lm	--	lm	--	lm	--	lm	lm	lm	--	ll	lm	lm	--	lm	lm	--	lm	ll	lm	lm	ll	lm	ll	lm	lm	lm	lm	ll	--	--	lm	ll	--	lm	lm	lm	--	ll	--	lm	lm
1450	LG7	M01528	2.648	lm	ll	--	ll	lm	--	lm	--	lm	--	lm	lm	lm	--	ll	lm	lm	--	lm	lm	--	lm	ll	lm	lm	ll	lm	ll	lm	lm	lm	lm	ll	--	lm	lm	ll	lm	lm	lm	lm	--	ll	--	lm	lm
1451	LG7	M00641	3.707	lm	ll	--	ll	lm	ll	lm	--	lm	--	lm	lm	lm	--	ll	lm	lm	--	lm	lm	--	lm	ll	lm	lm	ll	lm	ll	lm	lm	lm	lm	ll	--	--	lm	ll	ll	lm	lm	lm	--	ll	ll	lm	lm
1452	LG7	M51406	6.246	nn	np	np	np	np	np	np	np	np	np	np	np	np	nn	nn	np	np	--	nn	np	nn	nn	nn	np	nn	nn	np	nn	np	np	np	nn	np	nn	np	np	nn	nn	np	nn	np	np	nn	nn	nn	np
1453	LG7	M01506	7.438	nn	np	np	nn	np	np	np	--	np	np	np	np	--	nn	nn	np	--	nn	nn	np	nn	nn	nn	--	nn	nn	np	nn	np	np	np	nn	--	nn	np	np	nn	nn	np	nn	np	np	nn	nn	nn	np
1454	LG7	M64989	9.651	lm	ll	lm	lm	ll	lm	ll	lm	ll	--	lm	--	lm	lm	lm	lm	ll	lm	lm	ll	ll	lm	lm	lm	lm	lm	ll	lm	ll	--	--	lm	lm	lm	lm	ll	lm	lm	ll	lm	ll	lm	--	lm	lm	ll
1455	LG7	M72049	10.094	nn	np	--	nn	np	np	--	np	np	--	np	np	np	--	nn	nn	nn	nn	nn	nn	nn	nn	nn	nn	nn	nn	np	nn	np	np	np	nn	np	nn	np	np	--	nn	nn	nn	nn	nn	nn	nn	nn	nn
1456	LG7	M64991	11.621	lm	ll	lm	lm	ll	lm	ll	lm	ll	--	lm	--	lm	lm	lm	lm	ll	lm	lm	ll	ll	lm	lm	lm	lm	lm	ll	lm	ll	--	--	lm	lm	lm	lm	ll	lm	lm	ll	lm	ll	lm	--	lm	lm	ll
1457	LG7	M64988	11.895	lm	ll	lm	lm	ll	lm	ll	lm	ll	--	lm	--	lm	lm	lm	lm	ll	lm	lm	--	ll	lm	lm	lm	lm	lm	ll	lm	ll	--	--	lm	lm	lm	lm	ll	lm	lm	ll	lm	ll	lm	--	lm	lm	ll
1458	LG7	M56940	13.761	hk	hk	hh	hh	kk	hk	kk	hk	kk	kk	hk	kk	hk	hk	hh	hk	hk	--	hh	kk	kk	hh	hh	hk	hh	hh	kk	hh	kk	kk	--	hk	hk	hh	hh	kk	h-	hh	kk	--	kk	hk	--	hh	--	kk
1459	LG7	M56938	13.867	hk	hk	hh	hh	kk	hk	kk	hk	kk	kk	hk	kk	hk	hk	hh	hk	hk	--	hh	kk	kk	hh	hh	hk	hh	hh	kk	hh	kk	kk	--	hk	hk	hh	hh	kk	h-	hh	kk	--	kk	hk	--	hh	--	kk
1460	LG7	M68191	14.597	lm	ll	lm	lm	ll	lm	ll	lm	ll	--	lm	ll	lm	--	lm	lm	lm	lm	lm	ll	lm	lm	lm	lm	lm	lm	ll	lm	ll	lm	ll	lm	lm	lm	lm	ll	lm	lm	ll	lm	ll	lm	lm	lm	lm	ll
1461	LG7	M56615	18.442	nn	np	np	nn	--	np	np	--	np	nn	np	np	np	--	nn	np	--	nn	nn	np	nn	nn	nn	np	nn	nn	np	nn	np	np	np	nn	np	np	np	np	nn	nn	np	nn	np	np	--	nn	nn	--
1462	LG7	M01035	19.417	lm	ll	ll	ll	lm	ll	--	ll	lm	lm	ll	lm	ll	--	ll	--	ll	--	lm	lm	lm	lm	ll	ll	lm	ll	lm	ll	lm	--	--	lm	--	ll	lm	lm	--	--	lm	--	--	ll	lm	--	ll	lm
1463	LG7	M72765	20.386	nn	np	np	np	np	--	np	nn	np	--	np	--	np	--	nn	np	--	--	nn	np	nn	nn	nn	np	nn	nn	np	nn	np	--	--	nn	--	nn	np	np	--	nn	--	nn	np	np	nn	nn	--	np
1464	LG7	M56600	22.24	nn	np	np	nn	np	np	np	--	np	nn	np	np	np	np	nn	np	np	nn	nn	np	nn	nn	nn	--	nn	nn	np	nn	np	np	np	nn	np	np	np	np	nn	nn	np	--	np	np	--	nn	nn	--
1465	LG7	M01646	22.711	lm	ll	ll	ll	lm	ll	lm	ll	lm	--	ll	--	ll	lm	lm	ll	ll	lm	lm	--	lm	lm	--	ll	lm	lm	lm	lm	lm	ll	lm	lm	ll	lm	lm	lm	lm	lm	--	lm	lm	ll	lm	lm	lm	lm
1466	LG7	M56607	23.331	nn	np	np	nn	--	np	np	--	np	nn	np	np	np	nn	nn	--	nn	nn	nn	np	nn	nn	nn	--	nn	nn	np	nn	np	np	np	nn	nn	np	--	np	nn	nn	np	nn	np	np	--	nn	nn	--
1467	LG7	M56602	24.153	nn	np	np	nn	--	np	np	--	np	nn	np	np	np	nn	nn	--	nn	nn	nn	np	nn	nn	nn	np	nn	--	np	nn	np	np	np	nn	nn	np	--	np	nn	nn	np	nn	np	np	--	nn	nn	--
1468	LG7	M53885	25.35	nn	np	np	nn	np	np	--	nn	np	--	np	np	np	--	nn	--	--	--	nn	np	nn	nn	nn	--	nn	nn	--	nn	np	--	--	nn	np	nn	np	np	nn	nn	np	nn	np	nn	--	nn	nn	--
1469	LG7	M06390	25.583	lm	ll	--	ll	lm	ll	lm	--	lm	--	ll	--	ll	lm	--	ll	ll	--	--	lm	lm	lm	lm	ll	lm	lm	lm	lm	lm	--	lm	lm	ll	lm	lm	--	--	lm	lm	lm	--	ll	lm	lm	--	lm
1470	LG7	M53986	29.12	lm	ll	ll	ll	lm	ll	lm	ll	lm	lm	ll	lm	ll	--	ll	ll	ll	ll	lm	lm	lm	lm	ll	ll	lm	ll	lm	ll	lm	lm	lm	lm	ll	ll	ll	lm	ll	ll	lm	lm	lm	ll	lm	ll	lm	lm
1471	LG7	M69170	29.253	lm	ll	ll	ll	lm	ll	lm	ll	lm	--	ll	lm	ll	lm	ll	ll	ll	--	lm	lm	lm	lm	ll	ll	lm	ll	lm	ll	lm	--	lm	lm	ll	ll	ll	lm	--	ll	lm	lm	lm	ll	lm	ll	lm	lm
1472	LG7	M52802	30.418	lm	ll	ll	ll	lm	ll	lm	ll	lm	lm	ll	lm	ll	--	ll	ll	--	ll	lm	lm	lm	lm	ll	ll	lm	ll	lm	ll	lm	lm	--	lm	ll	ll	ll	lm	ll	ll	lm	ll	lm	ll	lm	ll	lm	lm
1473	LG7	M62099	30.76	nn	np	np	--	np	np	np	--	np	nn	--	--	np	nn	nn	np	nn	--	nn	np	nn	nn	nn	np	nn	nn	np	nn	np	nn	np	nn	np	np	--	np	nn	nn	np	--	np	np	--	nn	nn	np
1474	LG7	M62100	30.986	nn	np	np	--	np	np	np	--	np	nn	--	--	np	nn	nn	np	nn	--	nn	np	nn	nn	nn	np	nn	nn	np	nn	np	nn	np	nn	np	np	--	np	nn	nn	np	--	np	np	--	nn	nn	np
1475	LG7	M52803	31.058	lm	ll	ll	ll	lm	ll	lm	ll	lm	lm	ll	lm	ll	--	ll	ll	--	ll	lm	lm	lm	lm	ll	ll	lm	ll	lm	ll	lm	lm	--	lm	ll	ll	ll	lm	ll	ll	lm	ll	lm	ll	lm	ll	lm	lm
1476	LG7	M62098	31.51	nn	np	np	--	np	np	np	--	np	nn	--	--	np	nn	nn	--	nn	--	nn	np	nn	nn	nn	np	nn	nn	np	nn	np	nn	np	nn	np	np	--	np	nn	nn	np	--	np	np	--	nn	nn	np
1477	LG7	M06898	32.127	lm	ll	ll	lm	lm	ll	lm	ll	lm	lm	ll	lm	ll	ll	ll	ll	--	--	lm	lm	lm	lm	ll	ll	lm	ll	lm	lm	lm	--	--	lm	ll	ll	lm	lm	ll	ll	lm	--	lm	ll	ll	ll	lm	lm
1478	LG7	M06318	33.016	nn	np	--	np	np	np	np	--	np	np	np	--	np	--	nn	np	--	--	nn	np	--	nn	--	np	nn	nn	np	nn	np	np	np	nn	np	np	np	np	--	nn	np	--	np	np	--	nn	nn	np
1479	LG7	M64325	34.213	nn	np	--	nn	np	np	np	--	np	--	np	np	np	--	nn	np	--	--	nn	np	nn	nn	nn	np	nn	nn	np	--	np	--	np	nn	--	--	--	np	--	nn	np	np	np	np	--	nn	--	np
1480	LG7	M05671	34.268	lm	ll	lm	lm	ll	lm	ll	lm	ll	--	lm	--	lm	--	lm	lm	lm	--	ll	ll	ll	ll	lm	lm	ll	lm	ll	ll	ll	--	ll	ll	lm	lm	--	ll	ll	lm	ll	lm	ll	lm	ll	lm	--	ll
1481	LG7	M64326	34.499	nn	np	--	nn	np	np	np	--	np	--	np	np	np	--	nn	np	--	--	nn	np	nn	nn	nn	np	nn	nn	np	--	np	--	np	nn	--	--	--	np	nn	nn	np	np	np	np	--	nn	--	np
1482	LG7	M00380	34.509	lm	ll	lm	lm	ll	lm	ll	lm	ll	--	lm	--	lm	--	lm	lm	lm	--	ll	ll	ll	ll	lm	lm	ll	lm	ll	ll	ll	--	ll	ll	lm	lm	ll	ll	ll	lm	ll	lm	ll	lm	ll	lm	--	ll
1483	LG7	M53453	35.475	lm	ll	ll	lm	--	lm	lm	--	--	lm	ll	--	ll	lm	lm	ll	--	--	lm	lm	lm	lm	--	ll	lm	lm	lm	--	lm	--	lm	lm	--	ll	lm	--	--	lm	ll	lm	ll	ll	lm	ll	lm	ll
1484	LG7	M51902	36.421	hk	hk	hh	hk	hk	hh	hk	hh	hk	--	hh	hk	hh	kk	hk	h-	h-	hk	kk	hk	kk	kk	hk	hh	kk	hk	hk	kk	hk	k-	--	kk	hh	hk	hk	hk	hk	hk	hk	kk	k-	hh	kk	hk	kk	hk
1485	LG7	M58846	36.926	lm	ll	lm	--	ll	lm	ll	--	ll	ll	lm	ll	lm	--	lm	lm	lm	--	ll	ll	ll	ll	ll	lm	ll	lm	ll	ll	--	--	--	ll	--	lm	ll	ll	lm	lm	ll	--	ll	lm	ll	lm	ll	ll
1486	LG7	M54529	37.057	lm	ll	lm	--	--	lm	--	lm	--	lm	lm	--	lm	ll	--	lm	ll	ll	ll	lm	ll	ll	--	lm	ll	lm	--	ll	lm	lm	ll	ll	lm	lm	ll	lm	--	ll	--	ll	lm	lm	ll	lm	ll	lm
1487	LG7	M54302	37.1	lm	ll	ll	ll	lm	lm	lm	ll	lm	ll	--	lm	ll	lm	lm	ll	lm	lm	lm	lm	lm	lm	lm	ll	lm	--	lm	ll	lm	ll	ll	lm	lm	ll	lm	lm	ll	lm	lm	--	--	lm	lm	ll	lm	ll
1488	LG7	M54527	37.14	lm	ll	lm	--	--	lm	--	lm	--	lm	lm	--	lm	ll	--	lm	ll	ll	ll	lm	ll	ll	--	lm	ll	lm	--	ll	lm	lm	--	ll	lm	lm	--	lm	--	--	--	ll	lm	lm	ll	lm	ll	lm
1489	LG7	M54303	37.591	lm	ll	ll	ll	lm	lm	lm	ll	lm	ll	--	lm	ll	lm	lm	ll	lm	lm	lm	lm	lm	lm	lm	ll	lm	--	lm	ll	lm	ll	ll	lm	lm	ll	lm	lm	ll	lm	lm	--	--	lm	lm	ll	lm	ll
1490	LG7	M51903	37.614	hk	hk	hh	hk	hk	hh	hk	hh	hk	--	hh	hk	hh	kk	hk	hh	h-	hk	kk	hk	kk	kk	hk	hh	kk	hk	hk	kk	hk	k-	--	kk	hh	hk	hk	hk	hk	hk	hk	kk	k-	hh	kk	hk	kk	hk
1491	LG7	M02334	37.807	lm	ll	lm	lm	ll	lm	ll	lm	ll	ll	lm	ll	lm	ll	lm	lm	lm	lm	ll	ll	ll	ll	lm	lm	ll	lm	ll	ll	ll	ll	ll	ll	lm	lm	ll	ll	lm	lm	ll	ll	ll	lm	ll	lm	ll	ll
1492	LG7	M11708	37.83	lm	ll	lm	lm	ll	lm	ll	--	ll	ll	lm	ll	lm	--	lm	--	--	--	ll	ll	ll	ll	ll	lm	ll	lm	ll	ll	ll	--	ll	ll	lm	lm	ll	ll	--	lm	ll	--	ll	--	ll	lm	--	ll
1493	LG7	M02143	37.853	lm	ll	lm	lm	ll	lm	ll	--	ll	ll	lm	ll	lm	--	lm	--	lm	--	ll	ll	ll	ll	ll	lm	ll	lm	ll	ll	ll	--	ll	ll	lm	lm	ll	ll	--	lm	ll	--	ll	--	ll	lm	--	ll
1494	LG7	M06610	37.926	lm	ll	lm	lm	ll	lm	ll	--	ll	ll	lm	ll	lm	--	lm	--	lm	--	ll	ll	ll	ll	ll	lm	ll	lm	ll	ll	ll	--	ll	ll	lm	lm	ll	ll	--	lm	ll	--	ll	--	ll	lm	--	ll
1495	LG7	M72539	38.058	hk	hk	--	kk	hk	kk	--	kk	hk	--	kk	hk	kk	--	hk	kk	hk	--	hh	hk	hh	hh	--	kk	hh	hk	hk	hh	hk	--	kk	hh	--	hk	hk	hk	hk	hk	hk	hh	hk	kk	--	hk	hh	hk
1496	LG7	M00367	38.949	nn	np	np	np	np	nn	np	np	np	np	np	np	np	--	nn	np	nn	nn	nn	np	nn	nn	nn	np	nn	nn	np	np	np	np	--	nn	nn	np	np	np	nn	nn	np	np	np	np	nn	np	nn	np
1497	LG7	M02199	38.981	hk	hk	hh	hk	hk	hk	hk	hh	hk	hk	hh	hk	hh	kk	hk	hh	kk	--	kk	hk	kk	kk	hk	hh	kk	hk	hk	hk	hk	hh	hk	kk	hk	hh	hk	hk	hk	hk	k-	kk	hk	hh	kk	hh	kk	hh
1498	LG7	M07497	39.123	hk	hk	hh	hh	hk	hk	hk	hh	hk	--	hh	hk	hh	kk	hk	hh	hk	k-	kk	hk	kk	kk	hk	hh	kk	hk	hk	hk	hk	hh	hk	kk	hk	hh	hk	k-	hk	hk	hk	kk	hk	hh	kk	hh	kk	hh
1499	LG7	M11943	39.431	nn	np	np	nn	np	nn	np	np	np	np	np	np	np	nn	nn	np	nn	nn	nn	np	nn	nn	nn	np	nn	nn	np	np	np	np	np	nn	nn	np	np	np	nn	nn	np	nn	np	np	nn	np	nn	np
1500	LG7	M00661	39.657	nn	np	np	nn	np	nn	np	np	np	np	np	np	np	nn	nn	np	nn	nn	nn	np	nn	nn	nn	np	nn	nn	np	np	np	np	np	nn	nn	np	--	np	nn	nn	np	nn	np	np	nn	np	nn	np
1501	LG7	M61531	39.796	lm	ll	ll	ll	lm	lm	lm	ll	lm	lm	ll	lm	ll	lm	lm	ll	lm	lm	lm	lm	lm	lm	lm	ll	lm	lm	ll	lm	lm	ll	lm	lm	lm	ll	lm	lm	lm	lm	lm	ll	lm	ll	lm	ll	lm	ll
1502	LG7	M02611	40.208	nn	np	np	np	np	nn	np	np	np	np	np	np	np	nn	nn	np	nn	--	nn	np	nn	nn	nn	np	nn	nn	np	np	np	np	np	nn	nn	np	np	np	nn	nn	np	nn	np	np	--	np	nn	np
1503	LG7	M11717	40.548	lm	ll	ll	ll	--	lm	lm	ll	lm	--	ll	ll	ll	lm	--	ll	lm	lm	lm	lm	lm	lm	lm	ll	lm	lm	lm	lm	lm	ll	ll	lm	lm	ll	lm	lm	--	lm	lm	lm	lm	ll	lm	lm	lm	ll
1504	LG7	M04841	41.342	lm	ll	ll	lm	lm	lm	lm	ll	lm	lm	ll	--	ll	lm	lm	ll	--	--	lm	lm	lm	lm	lm	ll	lm	lm	lm	lm	lm	--	lm	lm	--	ll	lm	lm	lm	lm	lm	lm	lm	ll	lm	ll	lm	ll
1505	LG7	M03449	41.492	lm	ll	ll	lm	lm	lm	lm	ll	lm	lm	ll	--	ll	lm	lm	ll	--	--	lm	lm	lm	lm	lm	ll	lm	lm	lm	lm	lm	--	lm	lm	--	ll	lm	lm	lm	lm	lm	lm	lm	ll	lm	ll	lm	ll
1506	LG7	M09132	41.563	lm	ll	ll	lm	lm	lm	lm	ll	lm	lm	ll	--	ll	lm	lm	ll	--	--	lm	lm	lm	lm	lm	ll	lm	lm	lm	lm	lm	--	lm	lm	--	ll	lm	lm	lm	lm	lm	lm	lm	ll	lm	ll	lm	ll
1507	LG7	M61532	41.711	nn	np	np	np	np	nn	np	--	np	nn	np	np	np	nn	nn	np	nn	nn	nn	np	nn	nn	nn	np	nn	nn	np	np	np	np	np	nn	nn	np	--	np	nn	nn	np	np	np	np	nn	np	nn	np
1508	LG7	M61539	41.751	nn	np	np	np	np	nn	np	--	np	nn	np	np	np	nn	nn	np	nn	nn	nn	np	nn	nn	nn	np	nn	nn	np	np	np	np	np	nn	nn	np	--	np	nn	nn	np	np	np	np	nn	np	nn	np
1509	LG7	M52576	42.624	nn	np	np	nn	np	nn	np	np	np	np	np	np	np	--	nn	np	nn	--	nn	np	--	nn	nn	np	nn	nn	np	np	np	np	np	nn	nn	np	--	np	nn	nn	np	np	np	nn	--	np	nn	np
1510	LG7	M52578	42.663	nn	np	np	nn	np	nn	np	np	np	np	np	np	np	--	nn	np	nn	--	nn	np	--	nn	nn	np	nn	nn	np	np	np	np	np	nn	nn	np	--	np	nn	nn	np	np	np	nn	--	np	nn	np
1511	LG7	M52579	42.702	nn	np	np	--	np	nn	np	np	np	np	np	np	np	--	nn	np	nn	--	nn	np	--	nn	nn	np	nn	nn	np	np	np	np	np	nn	nn	np	--	np	nn	nn	np	np	np	nn	--	np	nn	np
1512	LG7	M52577	43.396	nn	np	np	np	np	nn	np	np	np	np	np	np	np	--	nn	np	nn	--	nn	np	--	nn	nn	np	nn	nn	np	np	np	np	np	nn	nn	np	--	np	nn	nn	np	np	np	nn	--	np	nn	np
1513	LG7	M00451	44.444	lm	ll	lm	lm	ll	lm	ll	lm	ll	ll	lm	ll	lm	ll	lm	lm	lm	lm	ll	ll	ll	ll	lm	lm	ll	lm	ll	ll	ll	lm	ll	ll	lm	lm	ll	ll	lm	lm	ll	ll	ll	lm	ll	lm	ll	lm
1514	LG7	M01243	44.495	lm	ll	lm	lm	ll	lm	ll	lm	ll	ll	lm	ll	lm	ll	lm	lm	lm	lm	ll	ll	ll	ll	lm	lm	ll	lm	ll	ll	ll	lm	ll	ll	lm	lm	ll	ll	lm	lm	ll	ll	ll	lm	ll	lm	ll	lm
1515	LG7	M72412	45.546	lm	ll	--	lm	ll	--	ll	--	ll	--	lm	ll	lm	--	lm	lm	--	--	ll	ll	ll	--	--	lm	ll	lm	ll	ll	ll	--	ll	ll	lm	--	ll	ll	lm	lm	ll	--	--	lm	--	lm	--	lm
1516	LG7	M54301	45.599	nn	np	np	nn	np	nn	np	np	np	--	nn	np	np	np	nn	np	np	nn	nn	np	nn	nn	nn	np	nn	nn	np	np	np	np	--	nn	nn	np	np	np	nn	nn	np	--	np	nn	nn	np	nn	np
1517	LG7	M00916	46.655	lm	ll	lm	lm	ll	lm	ll	lm	ll	ll	lm	ll	lm	ll	lm	lm	lm	lm	ll	ll	ll	ll	lm	lm	ll	lm	ll	ll	ll	lm	ll	ll	lm	lm	ll	ll	lm	lm	ll	ll	ll	lm	ll	lm	ll	lm
1518	LG7	M00229	47.081	nn	np	np	np	np	nn	np	--	np	--	nn	np	np	nn	nn	np	nn	nn	nn	np	nn	nn	nn	np	nn	nn	np	np	np	--	np	nn	nn	np	np	np	nn	nn	np	--	nn	nn	nn	np	nn	np
1519	LG7	M05218	47.183	lm	ll	lm	lm	ll	lm	ll	lm	ll	ll	lm	ll	lm	ll	lm	lm	lm	lm	ll	ll	ll	ll	lm	lm	ll	lm	ll	ll	ll	lm	ll	ll	lm	lm	ll	ll	lm	lm	ll	ll	ll	lm	ll	lm	ll	lm
1520	LG7	M03007	47.364	hk	hk	h-	h-	kk	h-	kk	h-	kk	kk	h-	h-	h-	h-	h-	h-	h-	h-	kk	h-	kk	kk	h-	h-	kk	h-	h-	h-	kk	h-	kk	kk	h-	h-	h-	kk	h-	h-	h-	kk	h-	h-	kk	h-	kk	h-
1521	LG7	M03025	47.936	lm	ll	lm	lm	ll	ll	ll	lm	ll	ll	lm	ll	lm	ll	lm	lm	lm	lm	ll	ll	ll	ll	lm	lm	ll	lm	ll	ll	ll	lm	ll	ll	lm	lm	ll	ll	lm	lm	ll	ll	ll	lm	ll	lm	ll	lm
1522	LG7	M06959	48.08	hk	hk	kk	hk	hk	hh	hk	kk	hk	--	hk	hk	kk	hh	hk	kk	--	hk	hh	hk	hh	hh	hk	kk	hh	hk	hk	hk	hk	kk	hk	hh	hk	kk	hk	hk	hk	hk	kk	hk	hh	hk	hk	kk	hh	kk
1523	LG7	M57363	49.624	lm	ll	--	--	ll	ll	ll	--	ll	ll	--	ll	--	ll	lm	ll	lm	lm	ll	ll	ll	ll	lm	--	ll	--	ll	ll	ll	lm	ll	ll	--	--	ll	ll	--	lm	lm	ll	ll	--	ll	--	ll	--
1524	LG7	M02555	49.792	hk	hk	hh	hh	hk	hk	h-	hh	hk	hk	hk	hk	hh	kk	hk	hh	hk	hh	kk	hk	kk	kk	hk	hh	kk	hk	hk	hk	hk	hh	--	kk	hk	hh	k-	h-	hk	hk	hk	hh	hk	hk	kk	hh	kk	hh
1525	LG7	M02598	49.986	nn	np	np	np	np	nn	np	np	np	--	nn	np	np	nn	nn	np	nn	nn	nn	np	nn	nn	nn	np	nn	nn	np	np	np	--	np	nn	nn	np	np	np	nn	nn	np	--	nn	nn	nn	np	nn	np
1526	LG7	M01109	50.447	lm	ll	lm	lm	ll	ll	ll	lm	ll	ll	lm	ll	lm	ll	lm	lm	lm	lm	ll	ll	ll	ll	lm	lm	ll	lm	ll	ll	ll	lm	ll	ll	lm	lm	ll	ll	lm	lm	ll	ll	ll	lm	ll	lm	ll	lm
1527	LG7	M51860	50.761	lm	ll	lm	lm	ll	ll	ll	lm	ll	ll	lm	ll	lm	ll	lm	lm	lm	--	ll	ll	ll	ll	lm	lm	ll	lm	ll	ll	ll	--	ll	ll	lm	lm	ll	ll	lm	lm	lm	--	ll	lm	ll	lm	ll	lm
1528	LG7	M51859	50.793	lm	ll	lm	lm	ll	ll	ll	lm	ll	ll	lm	ll	lm	ll	lm	lm	lm	--	ll	ll	ll	ll	lm	lm	ll	lm	ll	ll	ll	--	ll	ll	lm	lm	ll	ll	lm	lm	lm	--	ll	lm	ll	lm	ll	lm
1529	LG7	M52627	51.722	hk	hk	hh	hh	hk	kk	hk	hh	hk	kk	hk	hk	hh	kk	hk	hh	hk	--	kk	hk	kk	kk	hk	hh	kk	hk	h-	hk	hk	hk	hk	kk	hk	hh	k-	hk	hk	hk	hh	hk	kk	hk	kk	hh	kk	hh
1530	LG7	M09621	52.009	lm	ll	lm	--	ll	ll	ll	lm	ll	--	lm	ll	lm	ll	lm	lm	lm	lm	ll	ll	ll	ll	lm	lm	ll	lm	ll	ll	ll	--	ll	ll	lm	lm	ll	ll	lm	lm	lm	ll	ll	lm	--	lm	ll	lm
1531	LG7	M57295	52.33	nn	np	np	nn	np	nn	np	--	--	nn	nn	np	--	--	--	np	nn	nn	nn	nn	nn	nn	nn	np	nn	nn	np	--	np	np	np	nn	nn	np	np	--	nn	nn	np	np	nn	nn	nn	--	nn	np
1532	LG7	M53465	52.357	lm	ll	lm	lm	ll	ll	ll	lm	ll	ll	lm	ll	lm	ll	lm	lm	lm	--	ll	ll	ll	ll	lm	lm	ll	lm	ll	ll	ll	lm	ll	ll	--	lm	ll	ll	lm	lm	lm	ll	ll	lm	--	lm	ll	lm
1533	LG7	M57289	52.568	nn	np	np	nn	np	nn	np	--	--	nn	nn	np	nn	nn	nn	--	nn	nn	nn	nn	nn	nn	--	np	nn	nn	np	--	np	np	np	nn	nn	np	--	--	nn	nn	np	np	nn	nn	nn	--	nn	np
1534	LG7	M52316	53.289	nn	np	np	nn	np	--	np	--	np	nn	nn	--	np	--	nn	--	nn	--	nn	--	nn	nn	nn	nn	nn	nn	np	np	np	np	--	nn	nn	np	--	np	--	np	np	np	--	--	nn	np	nn	np
1535	LG7	M53451	54.921	lm	ll	ll	ll	lm	lm	ll	ll	--	ll	ll	lm	ll	lm	lm	--	--	--	lm	--	lm	--	lm	ll	lm	lm	lm	lm	lm	--	--	lm	--	ll	lm	--	--	ll	lm	lm	ll	ll	lm	ll	lm	ll
1536	LG7	M53452	54.968	lm	ll	ll	ll	lm	lm	ll	ll	--	ll	ll	lm	ll	lm	lm	--	--	--	lm	ll	lm	--	lm	ll	lm	lm	lm	lm	lm	--	ll	lm	--	ll	lm	ll	--	ll	lm	lm	ll	ll	lm	ll	lm	ll
1537	LG7	M67976	55.876	nn	np	np	np	np	nn	np	nn	np	--	nn	np	np	nn	nn	np	nn	nn	nn	np	nn	nn	nn	nn	nn	nn	np	np	np	np	np	nn	nn	np	--	np	nn	np	np	np	nn	nn	nn	np	nn	np
1538	LG7	M06589	57.68	hk	hk	hk	kk	kk	hh	hk	hk	hk	hh	hk	hk	kk	hh	hk	kk	hk	kk	h-	hk	hh	hh	hk	hk	hh	hk	hk	hk	hk	kk	hk	hh	hk	kk	hk	hk	hk	kk	kk	hk	hk	hk	hh	kk	hh	kk
1539	LG7	M08954	59.885	lm	ll	--	--	--	--	ll	lm	ll	--	lm	ll	--	ll	lm	lm	--	ll	--	--	lm	ll	--	lm	ll	lm	ll	--	--	--	ll	ll	--	lm	ll	lm	lm	--	--	--	--	lm	ll	--	ll	lm
1540	LG7	M05322	60.544	nn	np	np	nn	np	nn	np	nn	np	nn	nn	np	np	nn	nn	np	nn	nn	nn	np	nn	nn	nn	nn	nn	nn	--	np	np	--	np	nn	nn	np	np	--	nn	--	np	nn	nn	nn	nn	np	nn	np
1541	LG7	M01489	61.063	nn	np	np	nn	np	nn	np	nn	np	nn	nn	np	np	nn	nn	np	nn	nn	nn	np	nn	nn	nn	nn	nn	nn	--	np	np	--	np	nn	nn	np	np	--	nn	--	np	nn	nn	nn	nn	np	nn	np
1542	LG7	M08419	61.167	lm	ll	lm	lm	--	lm	lm	lm	lm	--	lm	--	lm	ll	--	lm	lm	lm	ll	lm	ll	--	lm	lm	--	lm	lm	ll	lm	lm	lm	ll	lm	lm	--	lm	lm	--	lm	--	lm	lm	--	ll	ll	lm
1543	LG7	M06924	61.57	lm	ll	lm	ll	lm	ll	lm	--	lm	lm	ll	lm	lm	lm	ll	lm	lm	ll	lm	lm	lm	lm	ll	--	lm	ll	lm	lm	lm	lm	lm	lm	ll	lm	lm	lm	ll	ll	lm	lm	lm	ll	lm	lm	lm	lm
1544	LG7	M01367	62.212	lm	ll	ll	--	lm	lm	lm	--	lm	lm	lm	lm	ll	lm	lm	ll	lm	--	lm	lm	lm	lm	lm	ll	lm	lm	lm	lm	lm	--	lm	lm	lm	ll	lm	lm	lm	lm	ll	--	lm	lm	lm	ll	lm	ll
1545	LG7	M07399	63.637	lm	ll	ll	--	lm	lm	lm	--	lm	lm	lm	lm	ll	lm	lm	ll	lm	--	lm	lm	lm	lm	lm	ll	lm	lm	lm	lm	lm	--	lm	lm	lm	ll	lm	lm	lm	lm	ll	--	lm	lm	lm	ll	lm	ll
1546	LG7	M07846	64.081	nn	np	--	nn	np	--	--	--	np	--	nn	np	np	nn	nn	np	nn	--	nn	np	nn	nn	nn	nn	nn	nn	np	np	np	np	--	nn	nn	np	np	np	--	np	np	--	nn	nn	nn	np	nn	np
1547	LG7	M62732	64.295	lm	ll	lm	lm	lm	lm	--	lm	lm	lm	lm	lm	lm	ll	--	lm	lm	ll	ll	lm	ll	ll	lm	lm	ll	--	lm	lm	lm	lm	--	ll	lm	lm	--	lm	--	ll	lm	lm	--	lm	ll	lm	ll	lm
1548	LG7	M03196	64.591	nn	np	nn	nn	nn	np	--	--	nn	np	np	np	nn	np	np	nn	np	np	np	--	np	np	np	--	np	--	np	--	--	nn	np	np	np	nn	np	--	nn	nn	nn	nn	np	--	np	nn	np	nn
1549	LG7	M00764	64.662	lm	ll	lm	lm	lm	ll	ll	--	--	--	lm	lm	lm	--	lm	lm	--	--	ll	--	ll	ll	lm	lm	ll	lm	lm	--	lm	lm	lm	ll	lm	lm	lm	lm	lm	lm	lm	lm	ll	lm	ll	lm	ll	lm
1550	LG7	M08171	65.376	lm	ll	lm	lm	lm	ll	ll	--	--	--	lm	lm	lm	--	lm	lm	--	--	ll	--	ll	ll	lm	lm	ll	lm	lm	--	lm	lm	lm	ll	lm	lm	lm	lm	--	lm	lm	lm	ll	lm	ll	lm	ll	lm
1551	LG7	M70539	66.98	hk	hk	hk	kk	kk	hh	hk	hk	hk	hh	hk	hk	kk	hh	hh	kk	hk	hk	hh	hk	hh	hh	hk	hk	hh	hk	hh	hk	hk	kk	hk	hk	h-	kk	h-	hk	--	kk	hk	h-	hh	hk	hh	kk	hh	kk
1552	LG7	M70542	67.016	hk	hk	hk	kk	kk	hh	hk	hk	hk	hh	hk	hk	kk	hh	hh	kk	hk	hk	hh	hk	hh	hh	hk	hk	hh	hk	hh	hk	hk	kk	hk	hk	h-	kk	h-	hk	--	kk	hk	h-	hh	hk	hh	kk	hh	kk
1553	LG7	M03950	67.492	hk	hk	hk	h-	hk	kk	hk	hk	hk	--	hk	hk	hk	kk	hk	hk	hk	hk	kk	hk	kk	kk	hk	hk	kk	hk	hk	hk	hk	hk	--	kk	hk	hh	hk	hh	hk	h-	hk	k-	kk	k-	hk	hk	--	hk
1554	LG7	M03723	67.493	hk	hk	hk	k-	hk	hh	hk	hk	hk	--	hk	hk	hk	hh	hk	hk	hk	hk	hh	hk	hh	hh	hk	hk	hh	hk	hk	hk	hk	hk	--	hh	hk	kk	hk	kk	hk	k-	hk	h-	hh	h-	hk	hk	--	hk
1555	LG7	M08075	67.838	hk	hk	hk	k-	hk	hh	hk	hk	hk	--	hk	hk	hk	hh	hk	hk	hk	hk	hh	hk	hh	hh	hk	hk	hh	hk	hk	hk	hk	hk	--	hh	hk	kk	hk	kk	hk	k-	hk	h-	hh	h-	hh	hk	--	hk
1556	LG7	M70543	67.848	nn	np	--	nn	np	nn	np	nn	np	nn	nn	np	--	nn	nn	np	nn	nn	nn	np	nn	nn	nn	nn	nn	nn	nn	np	np	np	np	np	nn	np	--	np	--	np	nn	--	nn	nn	nn	np	nn	np
1557	LG7	M06222	68.02	lm	ll	ll	lm	lm	ll	ll	--	ll	--	lm	ll	lm	--	lm	--	--	--	ll	ll	ll	ll	lm	lm	ll	lm	ll	ll	ll	--	ll	ll	lm	--	ll	ll	lm	lm	lm	ll	ll	lm	ll	--	ll	lm
1558	LG7	M02009	68.626	lm	ll	ll	lm	lm	ll	ll	--	ll	ll	lm	ll	lm	ll	ll	lm	lm	lm	ll	ll	ll	ll	lm	lm	ll	lm	ll	ll	ll	--	ll	ll	lm	lm	ll	ll	lm	lm	lm	ll	ll	lm	ll	lm	ll	lm
1559	LG7	M07763	69.573	lm	ll	ll	lm	lm	ll	ll	lm	ll	ll	lm	ll	lm	ll	ll	lm	lm	--	ll	ll	ll	ll	lm	lm	ll	lm	ll	ll	ll	lm	ll	ll	lm	lm	ll	ll	lm	lm	lm	ll	ll	lm	ll	lm	ll	lm
1560	LG7	M65479	71.786	lm	ll	ll	--	lm	ll	ll	lm	ll	--	lm	ll	ll	ll	ll	lm	lm	--	ll	ll	ll	ll	lm	--	ll	lm	ll	ll	ll	--	ll	ll	lm	--	ll	ll	lm	lm	lm	ll	ll	lm	ll	lm	lm	lm
1561	LG7	M09337	72.913	nn	np	np	nn	np	nn	np	nn	np	nn	nn	np	np	--	nn	np	nn	nn	nn	np	nn	nn	nn	nn	nn	nn	nn	np	np	np	np	--	nn	--	--	np	nn	np	nn	np	nn	nn	nn	np	nn	np
1562	LG7	M73465	73.27	nn	np	np	nn	nn	--	nn	nn	np	--	nn	nn	np	np	--	nn	nn	--	np	np	--	np	nn	nn	np	nn	--	np	np	nn	--	np	nn	nn	np	np	nn	nn	nn	np	nn	nn	--	nn	nn	nn
1563	LG7	M07260	74.816	nn	np	np	nn	np	nn	np	nn	np	nn	nn	np	np	nn	nn	np	nn	nn	nn	np	nn	nn	nn	nn	nn	nn	nn	np	np	--	np	np	nn	--	np	np	nn	np	nn	np	nn	nn	nn	np	nn	np
1564	LG7	M05264	76.2	lm	ll	ll	--	lm	ll	ll	lm	ll	--	lm	ll	ll	ll	ll	lm	lm	--	ll	ll	ll	ll	lm	lm	ll	lm	ll	ll	ll	lm	ll	lm	lm	lm	ll	ll	--	lm	lm	ll	ll	lm	ll	ll	lm	lm
1565	LG7	M05721	76.974	lm	ll	ll	--	lm	ll	ll	lm	ll	--	lm	ll	ll	ll	ll	lm	lm	--	ll	ll	ll	ll	lm	lm	ll	lm	ll	ll	ll	lm	ll	lm	lm	lm	ll	ll	--	lm	lm	ll	ll	lm	ll	ll	lm	lm
1566	LG7	M59290	77.442	nn	np	nn	nn	nn	np	--	np	nn	np	nn	nn	--	np	np	nn	np	nn	np	nn	np	np	nn	nn	nn	np	np	nn	nn	nn	nn	nn	--	nn	nn	nn	np	nn	np	np	np	--	--	nn	np	nn
1567	LG7	M54140	77.708	lm	ll	ll	--	lm	ll	ll	lm	ll	--	lm	ll	ll	ll	ll	lm	lm	--	ll	ll	ll	ll	lm	lm	ll	lm	ll	ll	ll	--	--	lm	lm	lm	ll	ll	lm	lm	lm	ll	ll	lm	ll	ll	lm	lm
1568	LG7	M59288	78.393	nn	np	nn	nn	nn	np	nn	np	nn	np	nn	nn	--	--	np	--	np	nn	np	nn	np	np	nn	nn	nn	np	np	nn	nn	nn	np	nn	--	nn	nn	nn	np	nn	np	np	np	np	--	nn	np	nn
1569	LG7	M01053	78.491	lm	ll	ll	--	lm	ll	ll	lm	ll	lm	lm	ll	ll	ll	ll	lm	--	ll	ll	ll	ll	ll	lm	lm	ll	lm	ll	ll	ll	lm	--	lm	lm	lm	ll	ll	lm	lm	lm	ll	ll	lm	lm	ll	lm	ll
1570	LG7	M09733	78.632	lm	ll	ll	--	lm	ll	ll	lm	ll	lm	lm	ll	ll	ll	ll	lm	lm	lm	ll	ll	ll	ll	lm	lm	ll	lm	ll	ll	ll	lm	ll	lm	lm	lm	ll	ll	lm	lm	lm	ll	ll	lm	lm	ll	lm	ll
1571	LG7	M10623	78.874	lm	ll	--	lm	--	--	ll	--	ll	lm	lm	ll	ll	--	ll	lm	lm	--	ll	ll	ll	ll	lm	lm	ll	lm	ll	--	ll	--	ll	lm	--	lm	ll	ll	--	--	lm	--	ll	lm	lm	ll	lm	ll
1572	LG7	M12327	79.068	lm	ll	ll	--	lm	ll	ll	ll	ll	--	lm	ll	ll	ll	ll	lm	lm	--	ll	ll	ll	ll	--	ll	ll	lm	ll	lm	ll	lm	ll	lm	lm	lm	ll	lm	--	--	lm	ll	ll	lm	--	ll	lm	ll
1573	LG7	cms13325	79.309	lm	ll	lm	ll	--	ll	lm	ll	lm	ll	ll	ll	ll	ll	ll	lm	ll	ll	ll	lm	ll	ll	ll	lm	ll	--	ll	lm	lm	lm	lm	lm	ll	lm	lm	lm	ll	lm	--	--	ll	ll	ll	lm	ll	lm
1574	LG7	M11753	79.934	nn	np	nn	np	nn	np	nn	--	nn	--	np	np	np	--	np	nn	np	nn	np	nn	np	np	nn	nn	np	np	np	nn	nn	nn	nn	nn	np	nn	nn	--	np	nn	np	nn	np	np	np	nn	np	nn
1575	LG7	M10814	80.689	lm	ll	lm	ll	lm	lm	lm	ll	lm	ll	ll	lm	lm	lm	lm	lm	ll	ll	lm	lm	--	--	lm	lm	lm	ll	lm	--	lm	lm	lm	lm	ll	ll	lm	--	ll	lm	ll	lm	lm	ll	ll	lm	ll	lm
1576	LG7	M06245	81.046	lm	ll	ll	lm	lm	ll	ll	lm	ll	lm	lm	ll	ll	ll	ll	ll	lm	--	ll	ll	ll	ll	lm	lm	ll	lm	ll	lm	ll	lm	ll	lm	lm	lm	ll	lm	--	lm	lm	ll	ll	lm	lm	ll	lm	ll
1577	LG7	M09777	81.346	hk	hk	hh	hk	hk	hk	hh	hk	hh	hk	kk	hk	hk	hk	hk	hh	hk	hk	hk	hh	hk	hk	hk	hk	hk	kk	hk	hk	hh	hh	hh	hk	hk	hk	hh	h-	hk	hk	hk	hk	hk	hk	hk	hh	k-	hh
1578	LG7	M65763	81.508	lm	ll	--	lm	--	--	--	lm	ll	--	lm	--	ll	ll	ll	ll	lm	--	ll	ll	ll	--	lm	lm	ll	lm	--	lm	ll	--	--	lm	--	lm	ll	lm	ll	lm	lm	--	ll	lm	lm	--	--	ll
1579	LG7	M02295	81.858	nn	np	nn	nn	nn	np	nn	np	nn	np	np	np	np	np	np	nn	np	--	np	nn	--	np	nn	nn	np	np	np	nn	nn	nn	nn	nn	np	nn	nn	nn	np	nn	np	np	np	np	np	nn	np	nn
1580	LG7	M51049	82.515	lm	ll	ll	--	lm	ll	ll	--	ll	--	lm	ll	ll	--	ll	lm	lm	lm	ll	ll	ll	ll	lm	lm	ll	lm	ll	lm	ll	--	--	lm	--	--	ll	--	ll	ll	--	--	ll	lm	lm	ll	--	ll
1581	LG7	M11280	82.893	lm	ll	ll	lm	lm	ll	ll	lm	ll	lm	lm	ll	ll	ll	ll	ll	lm	lm	ll	ll	ll	ll	lm	lm	ll	lm	ll	lm	ll	lm	ll	--	lm	lm	ll	lm	lm	lm	lm	ll	ll	lm	lm	ll	--	ll
1582	LG7	M64127	83.046	hk	hk	kk	hh	hk	hk	kk	hh	kk	--	hh	hk	hk	hk	hk	kk	hh	--	hk	kk	hk	hk	hk	hk	hk	hh	hk	hk	kk	hk	kk	hk	hh	k-	kk	hk	hh	hk	hh	kk	hk	hh	hh	kk	hh	kk
1583	LG7	M11208	83.385	nn	np	nn	nn	nn	--	nn	--	nn	np	np	np	np	np	np	nn	np	--	np	nn	np	np	nn	nn	np	np	np	nn	nn	--	nn	nn	np	nn	nn	nn	nn	nn	np	--	np	np	np	nn	np	nn
1584	LG7	M11361	84.863	nn	np	nn	np	nn	np	nn	nn	nn	--	np	np	np	np	np	nn	np	--	np	nn	np	--	nn	nn	nn	np	np	nn	nn	nn	nn	nn	np	nn	nn	nn	np	nn	np	np	np	np	np	nn	--	nn
1585	LG7	M02737	86.076	nn	np	nn	nn	nn	np	nn	np	nn	np	np	np	np	--	np	nn	np	np	--	nn	np	np	nn	nn	np	np	np	nn	nn	nn	nn	nn	np	nn	nn	nn	np	nn	np	np	np	np	np	nn	np	nn
1586	LG7	M52382	87.331	hk	hk	kk	hk	hk	hk	kk	hh	kk	hh	hh	hk	hk	hk	hk	kk	hh	--	hk	kk	hk	hk	hk	hk	hk	hh	hk	hk	kk	hk	kk	hk	hh	hk	kk	hk	hh	hk	hh	kk	hk	hh	hh	kk	hh	kk
1587	LG7	M52381	87.332	hk	hk	hh	hk	hk	hk	hh	kk	hh	kk	kk	hk	hk	hk	hk	hh	kk	--	hk	hh	hk	hk	hk	hk	hk	kk	hk	hk	hh	hk	hh	hk	kk	hk	hh	hk	kk	hk	kk	hh	hk	kk	kk	hh	kk	hh
1588	LG7	M03083	88.396	nn	np	--	nn	np	nn	np	nn	np	nn	nn	nn	--	np	np	np	nn	nn	np	np	--	--	nn	nn	np	nn	--	--	np	np	np	np	nn	np	np	np	np	--	nn	np	np	nn	nn	np	nn	np
1589	LG7	M09110	88.919	nn	np	nn	np	nn	np	nn	np	nn	np	np	--	np	np	np	nn	nn	--	nn	nn	np	np	nn	nn	nn	np	np	nn	nn	--	nn	nn	np	nn	nn	nn	np	nn	np	np	np	np	np	nn	np	nn
1590	LG7	M08926	88.967	nn	np	nn	np	nn	np	nn	np	nn	np	np	--	np	np	np	nn	nn	--	nn	nn	np	np	nn	nn	nn	np	np	nn	nn	--	nn	nn	np	nn	nn	nn	np	nn	np	np	np	np	np	nn	np	nn
1591	LG7	cms13417	89.314	nn	np	np	np	nn	nn	np	nn	np	nn	nn	np	np	np	np	nn	nn	nn	np	np	np	np	nn	nn	np	--	--	--	np	nn	np	nn	nn	nn	np	--	nn	nn	--	--	np	nn	nn	np	nn	np
1592	LG7	M54658	90.289	nn	np	nn	nn	nn	np	nn	--	nn	np	np	--	np	nn	np	nn	np	np	nn	nn	--	np	nn	nn	nn	np	np	nn	nn	nn	nn	nn	--	nn	nn	nn	nn	nn	np	np	np	nn	nn	nn	np	nn
1593	LG7	M54660	90.313	nn	np	nn	nn	nn	np	nn	--	nn	np	np	--	np	nn	np	nn	np	np	nn	nn	--	np	nn	nn	nn	np	np	nn	nn	nn	nn	nn	--	nn	nn	nn	nn	nn	np	np	np	nn	nn	nn	np	nn
1594	LG7	M04350	90.332	lm	ll	ll	lm	lm	ll	ll	lm	ll	lm	lm	ll	ll	ll	ll	ll	lm	--	ll	ll	ll	ll	lm	lm	ll	lm	ll	lm	ll	lm	ll	lm	ll	lm	ll	lm	lm	lm	lm	ll	ll	lm	lm	ll	lm	ll
1595	LG7	M02652	91.012	lm	ll	ll	lm	lm	ll	ll	lm	ll	lm	lm	ll	ll	ll	ll	ll	lm	--	ll	ll	ll	ll	lm	lm	ll	lm	ll	lm	ll	lm	ll	lm	ll	lm	ll	lm	lm	lm	lm	ll	ll	lm	lm	ll	lm	ll
1596	LG7	M00453	91.078	lm	ll	ll	lm	lm	ll	ll	lm	ll	lm	lm	ll	ll	ll	ll	ll	lm	--	ll	ll	ll	ll	lm	lm	ll	lm	ll	lm	ll	lm	ll	lm	ll	lm	ll	lm	lm	lm	lm	ll	ll	lm	lm	ll	lm	ll
1597	LG7	M02852	91.671	lm	ll	ll	lm	lm	ll	ll	lm	ll	lm	lm	ll	ll	ll	ll	ll	lm	--	ll	ll	ll	ll	lm	lm	ll	lm	ll	lm	ll	lm	ll	lm	ll	lm	ll	lm	lm	lm	lm	ll	ll	lm	lm	ll	lm	ll
1598	LG7	M01853	93.028	hk	hk	kk	hh	hk	kk	kk	hh	kk	hh	hh	kk	kk	kk	kk	kk	hk	hh	kk	kk	kk	kk	hk	hk	kk	hh	kk	hk	kk	hk	kk	hk	--	hk	kk	hk	hh	hk	hh	--	kk	hh	hk	kk	hh	kk
1599	LG7	M00679	93.37	lm	ll	ll	--	lm	ll	ll	lm	ll	--	lm	ll	ll	ll	ll	ll	lm	--	ll	ll	ll	ll	lm	lm	ll	lm	ll	lm	ll	lm	--	lm	--	lm	ll	lm	--	lm	lm	ll	ll	lm	lm	ll	lm	ll
1600	LG7	M00516	95.147	hk	hk	kk	hk	hk	hk	kk	hh	kk	--	hh	h-	hk	--	hk	kk	hk	hh	kk	kk	hk	hk	k-	hk	kk	hh	hk	hk	kk	hk	kk	hk	hh	hk	kk	hk	hh	hk	hh	hk	hk	hh	--	kk	hh	kk
1601	LG7	M05502	95.241	nn	np	nn	nn	nn	np	nn	np	nn	np	np	np	np	np	np	nn	np	--	nn	nn	np	np	nn	nn	nn	np	np	nn	nn	nn	nn	nn	--	nn	nn	nn	nn	nn	np	np	np	np	np	nn	np	nn
1602	LG7	M09285	95.653	lm	ll	ll	--	lm	ll	ll	lm	ll	lm	lm	ll	ll	ll	ll	ll	ll	--	ll	ll	ll	ll	lm	lm	ll	lm	ll	lm	ll	--	ll	lm	lm	lm	ll	lm	--	lm	lm	ll	ll	lm	lm	ll	lm	ll
1603	LG7	M55544	96.023	lm	ll	ll	--	lm	ll	ll	lm	ll	ll	lm	ll	ll	ll	ll	ll	--	lm	ll	ll	ll	ll	lm	lm	ll	lm	ll	lm	ll	lm	ll	lm	lm	lm	ll	lm	--	lm	lm	ll	ll	lm	lm	ll	lm	ll
1604	LG7	M03521	96.503	nn	np	nn	nn	nn	np	nn	np	nn	np	np	np	np	np	np	nn	np	--	nn	nn	np	np	nn	nn	nn	np	np	nn	nn	nn	nn	nn	np	nn	nn	nn	nn	nn	np	np	np	np	np	nn	np	nn
1605	LG7	M64587	96.552	lm	ll	ll	--	lm	ll	ll	lm	ll	lm	lm	ll	ll	ll	ll	ll	lm	--	ll	ll	ll	ll	lm	lm	ll	lm	ll	lm	ll	--	--	lm	lm	lm	ll	lm	lm	lm	lm	ll	ll	lm	lm	ll	lm	ll
1606	LG7	cms13413	96.778	hk	hk	kk	kk	hk	hk	kk	hh	kk	hh	hh	hk	hk	hk	hk	kk	hh	hh	kk	kk	hk	hk	hk	hk	kk	hh	hk	hk	kk	hk	kk	hk	hh	hk	kk	hk	hk	hk	hh	hk	hk	hh	hh	kk	hh	kk
1607	LG7	M07613	96.985	nn	np	nn	nn	nn	np	nn	np	nn	np	np	np	np	np	np	nn	np	np	nn	nn	np	np	nn	nn	nn	np	np	nn	nn	np	nn	nn	np	nn	nn	nn	nn	nn	np	np	np	np	np	nn	np	nn
1608	LG7	M69897	97.897	nn	np	nn	nn	nn	np	nn	np	nn	--	np	np	np	--	--	nn	np	--	nn	nn	nn	np	nn	nn	nn	np	np	nn	nn	nn	--	nn	np	nn	nn	nn	nn	nn	np	np	np	np	nn	nn	np	nn
1609	LG7	M62566	98.396	hk	hk	kk	hh	hk	hk	kk	hh	kk	hh	hh	hk	hk	hk	hk	kk	hh	hh	kk	kk	hk	hk	hk	hk	kk	hh	hk	hk	kk	--	--	hk	hh	hk	kk	hk	hk	hk	hh	hk	hk	hh	hh	kk	hh	kk
1610	LG7	M06499	99.359	lm	ll	lm	ll	lm	--	lm	ll	lm	ll	ll	lm	lm	ll	lm	lm	ll	ll	lm	lm	ll	ll	ll	lm	lm	ll	lm	lm	lm	lm	lm	lm	ll	lm	lm	lm	--	--	ll	--	lm	ll	ll	lm	ll	lm
1611	LG7	M06575	100.226	lm	ll	lm	lm	lm	lm	lm	ll	lm	ll	ll	lm	--	lm	lm	lm	ll	ll	lm	lm	lm	lm	--	lm	lm	ll	lm	lm	lm	ll	--	lm	ll	--	lm	lm	--	lm	ll	lm	lm	ll	ll	lm	ll	lm
1612	LG7	M62136	100.371	nn	np	nn	nn	nn	nn	nn	np	nn	--	np	np	np	np	np	nn	np	np	nn	nn	--	np	nn	nn	nn	np	np	nn	nn	np	nn	nn	np	nn	nn	nn	--	nn	np	np	np	np	np	nn	np	nn
1613	LG7	M02362	100.935	hk	hk	hh	kk	hk	hh	hh	kk	hh	kk	kk	hk	hk	hk	hk	hh	kk	--	hh	hh	hk	hk	hk	hk	hh	kk	hk	hk	hh	kk	h-	hk	kk	hk	hh	hk	hk	hk	kk	hk	hk	kk	kk	hh	kk	hh
1614	LG7	M00759	101.42	nn	np	nn	nn	nn	nn	nn	np	nn	np	np	np	np	np	np	nn	np	--	nn	nn	np	np	nn	nn	nn	np	np	nn	nn	np	nn	nn	np	nn	nn	nn	nn	nn	np	np	np	np	np	nn	np	nn
1615	LG7	M51210	101.632	lm	ll	lm	--	--	lm	lm	ll	lm	ll	--	lm	lm	--	--	lm	lm	ll	lm	lm	lm	--	--	lm	lm	ll	--	ll	lm	ll	lm	lm	ll	ll	lm	lm	ll	--	ll	lm	lm	ll	ll	lm	ll	lm
1616	LG7	M11184	101.67	lm	ll	ll	lm	lm	ll	ll	lm	ll	lm	lm	ll	ll	ll	ll	ll	ll	ll	ll	ll	ll	ll	lm	lm	ll	lm	ll	lm	ll	lm	ll	lm	lm	lm	ll	lm	lm	lm	lm	ll	ll	lm	--	ll	lm	ll
1617	LG7	M72121	101.863	nn	np	nn	nn	nn	nn	nn	np	nn	nn	np	np	np	np	np	nn	np	--	nn	nn	np	np	nn	nn	nn	np	np	nn	nn	--	nn	nn	np	nn	nn	nn	nn	nn	np	np	np	np	np	nn	np	nn
1618	LG7	M05726	101.881	nn	np	nn	nn	nn	nn	nn	np	nn	--	np	np	np	nn	np	--	--	--	nn	nn	--	np	nn	nn	nn	np	np	nn	nn	np	--	nn	np	nn	nn	nn	--	nn	--	nn	np	np	np	nn	np	nn
1619	LG7	M00454	102.442	nn	np	nn	nn	nn	nn	nn	np	nn	np	np	np	np	np	np	nn	nn	np	nn	nn	nn	np	nn	nn	nn	np	np	nn	nn	np	nn	nn	np	nn	nn	nn	nn	nn	np	nn	np	nn	np	nn	np	nn
1620	LG7	M00167	102.568	nn	np	nn	nn	nn	nn	nn	np	nn	np	np	np	np	np	np	nn	nn	np	nn	nn	nn	np	nn	nn	nn	np	np	nn	nn	np	nn	nn	np	nn	nn	nn	nn	nn	np	nn	np	nn	np	nn	np	nn
1621	LG7	M05657	103.069	nn	np	--	np	np	nn	nn	--	nn	--	np	nn	nn	--	nn	nn	nn	nn	nn	--	nn	nn	np	nn	nn	np	nn	np	nn	np	--	--	--	np	nn	np	--	np	np	nn	nn	np	np	nn	--	nn
1622	LG7	M10238	103.494	nn	np	nn	np	nn	nn	nn	np	nn	np	np	np	np	np	np	nn	nn	np	nn	nn	np	np	nn	nn	nn	np	np	nn	nn	np	nn	nn	--	nn	nn	nn	nn	nn	np	np	np	np	np	nn	np	nn
1623	LG7	M05343	104.123	nn	np	nn	np	nn	nn	nn	np	nn	np	np	np	np	np	np	nn	nn	np	nn	nn	np	np	nn	nn	nn	np	np	nn	nn	np	nn	nn	--	nn	nn	nn	nn	nn	np	np	np	np	np	nn	np	nn
1624	LG7	M03148	104.216	lm	ll	ll	lm	lm	ll	ll	lm	ll	lm	ll	ll	ll	ll	ll	ll	ll	lm	ll	ll	ll	ll	lm	lm	ll	lm	ll	lm	lm	lm	ll	lm	lm	lm	ll	lm	lm	lm	lm	ll	ll	lm	lm	ll	lm	ll
1625	LG7	cms13256	104.988	hk	hk	hk	kk	hk	kk	hk	hh	kk	hh	hk	hk	hk	hk	hk	kk	kk	hh	kk	kk	kk	hk	hk	hk	kk	hh	--	--	hk	hh	kk	hk	hh	hh	--	--	hh	hk	hh	--	hk	hh	hh	kk	hh	kk
1626	LG7	M55488	105.952	lm	ll	ll	lm	lm	lm	ll	lm	ll	lm	lm	lm	lm	--	lm	ll	lm	lm	ll	ll	ll	--	lm	lm	ll	lm	lm	lm	ll	ll	ll	lm	lm	lm	ll	--	lm	lm	lm	lm	lm	lm	lm	ll	lm	ll
1627	LG7	M11681	106.12	lm	ll	ll	lm	lm	--	ll	lm	ll	lm	lm	lm	lm	lm	lm	ll	lm	lm	ll	ll	lm	lm	lm	lm	ll	lm	--	lm	ll	lm	ll	lm	lm	lm	ll	--	lm	lm	lm	--	lm	lm	lm	ll	lm	ll
1628	LG7	M58467	106.261	nn	np	nn	nn	nn	--	--	--	nn	--	np	np	np	np	np	nn	--	--	nn	nn	np	--	nn	nn	nn	np	np	nn	nn	np	--	nn	--	nn	nn	nn	--	nn	np	np	np	np	np	nn	np	nn
1629	LG7	M58468	106.56	nn	np	nn	nn	nn	--	--	--	nn	--	np	np	np	np	np	nn	--	--	nn	nn	np	--	nn	nn	nn	np	np	nn	nn	np	--	nn	--	nn	nn	nn	--	nn	np	np	np	np	np	nn	np	nn
1630	LG7	M01087	109.178	hk	hk	kk	h-	h-	kk	kk	h-	kk	--	h-	h-	h-	h-	h-	--	kk	h-	kk	kk	h-	h-	h-	h-	kk	h-	h-	h-	h-	h-	--	h-	h-	h-	kk	h-	h-	h-	h-	h-	h-	h-	h-	kk	h-	kk
1631	LG7	M06860	110.143	hk	hk	kk	h-	h-	kk	kk	h-	kk	h-	h-	h-	h-	h-	h-	--	kk	--	kk	kk	h-	h-	h-	h-	kk	h-	h-	h-	h-	h-	--	h-	h-	h-	kk	h-	h-	h-	h-	h-	h-	h-	h-	h-	h-	kk
1632	LG7	M02363	110.644	lm	ll	ll	lm	lm	ll	ll	lm	ll	lm	lm	lm	lm	lm	lm	ll	ll	lm	ll	ll	lm	lm	lm	lm	ll	lm	lm	lm	--	lm	ll	lm	lm	lm	ll	--	lm	lm	lm	lm	lm	lm	lm	ll	lm	ll
1633	LG7	M11983	111.372	hk	hk	hh	kk	hk	hh	hk	kk	hh	kk	hk	hk	hk	--	hk	hh	hh	kk	hh	hh	hk	hk	hk	hk	hh	kk	hk	kk	hk	kk	hh	hk	kk	kk	hh	hk	kk	hk	kk	hk	hk	kk	hk	hh	kk	hh
1634	LG7	M03459	111.693	hk	hk	kk	hk	hk	kk	hk	hh	kk	hh	hk	hk	hk	--	hk	kk	kk	hh	kk	kk	hk	hk	hk	hk	kk	hh	hk	hh	hk	hh	kk	hk	hh	hh	kk	hk	hh	hk	hh	hk	hk	hh	hh	kk	--	kk
1635	LG7	M12540	111.852	lm	ll	lm	--	lm	lm	--	ll	lm	ll	lm	ll	lm	ll	lm	lm	lm	--	lm	lm	--	ll	ll	lm	lm	ll	lm	ll	ll	ll	--	lm	ll	ll	lm	--	ll	--	ll	lm	ll	ll	ll	lm	ll	lm
1636	LG7	M08481	112.625	lm	ll	lm	ll	lm	lm	lm	ll	lm	ll	lm	--	lm	lm	lm	lm	lm	ll	lm	lm	lm	lm	ll	--	lm	ll	--	ll	lm	ll	lm	--	ll	ll	lm	lm	ll	--	ll	lm	--	ll	ll	lm	ll	lm
1637	LG7	M07079	112.67	lm	ll	lm	ll	ll	lm	lm	ll	lm	--	lm	lm	lm	lm	lm	lm	lm	ll	lm	lm	lm	lm	ll	ll	lm	ll	lm	ll	ll	ll	lm	ll	ll	ll	lm	ll	ll	ll	ll	lm	lm	ll	ll	lm	ll	lm
1638	LG7	M04128	112.786	lm	ll	lm	lm	ll	lm	lm	ll	lm	ll	lm	lm	lm	lm	lm	lm	lm	--	lm	lm	lm	lm	ll	ll	lm	ll	lm	ll	ll	ll	lm	ll	ll	ll	lm	ll	ll	ll	ll	lm	lm	ll	--	lm	ll	lm
1639	LG7	M72088	113.076	nn	np	nn	nn	nn	nn	np	np	nn	--	np	np	np	np	np	nn	nn	np	nn	nn	np	np	nn	nn	nn	np	np	np	nn	np	--	nn	np	np	nn	nn	np	nn	np	np	np	np	np	nn	np	nn
1640	LG7	M72089	113.101	nn	np	nn	nn	nn	nn	np	np	nn	--	np	np	np	np	np	nn	nn	np	nn	nn	np	np	nn	nn	nn	np	np	np	nn	np	--	nn	np	np	nn	nn	np	nn	np	np	np	np	np	nn	np	nn
1641	LG7	M04479	113.436	nn	np	np	np	nn	np	np	nn	np	nn	np	np	np	np	np	--	np	nn	np	np	np	np	nn	nn	np	nn	nn	nn	nn	nn	np	nn	nn	nn	np	nn	nn	nn	nn	np	np	nn	nn	np	nn	np
1642	LG7	M08495	113.781	hk	hk	hh	hk	hk	hh	hk	hk	hh	--	hk	hh	hk	--	hk	hh	hh	--	hh	hh	hk	hk	hk	hk	hh	kk	hk	hk	hk	kk	--	hk	kk	k-	hh	hk	hk	hk	hk	hh	k-	hk	k-	hh	hk	hh
1643	LG7	M62399	114.008	lm	ll	lm	lm	ll	lm	lm	ll	lm	ll	lm	lm	lm	--	lm	lm	lm	--	lm	ll	lm	lm	ll	lm	--	ll	ll	ll	ll	ll	lm	ll	ll	ll	lm	ll	ll	ll	ll	lm	lm	ll	ll	lm	ll	--
1644	LG7	M01815	114.135	lm	ll	lm	lm	ll	lm	lm	ll	lm	ll	lm	lm	lm	lm	lm	lm	lm	ll	lm	ll	lm	lm	ll	lm	lm	ll	ll	ll	ll	lm	--	ll	ll	ll	ll	ll	ll	ll	ll	lm	lm	ll	ll	lm	ll	lm
1645	LG7	M02596	115.343	nn	np	nn	nn	nn	nn	np	np	nn	np	np	np	np	np	np	nn	nn	np	nn	nn	nn	np	nn	nn	nn	np	np	nn	nn	np	nn	nn	np	nn	nn	nn	--	nn	np	np	--	np	--	nn	np	nn
1646	LG7	M09149	115.911	hk	hk	kk	hk	hk	kk	hk	hh	kk	hk	hk	hk	hk	hk	hk	kk	kk	--	kk	kk	kk	hk	hk	hk	kk	hh	hk	hh	hk	h-	--	hk	hh	hh	kk	hk	hk	hk	hk	hk	hk	hk	--	kk	hh	kk
1647	LG7	M04530	116.017	hk	hk	hh	hk	hk	hh	hk	kk	hh	hk	hk	hk	hk	hk	hk	hh	hh	--	hh	hh	hh	hk	hk	hk	hh	kk	hk	kk	hk	k-	--	hk	kk	kk	hh	hk	hk	hk	hk	hk	hk	hk	--	hh	kk	hh
1648	LG7	M02712	116.337	lm	ll	ll	lm	lm	ll	lm	lm	ll	lm	lm	--	lm	--	--	ll	ll	ll	ll	ll	lm	--	--	lm	ll	lm	lm	lm	lm	--	ll	lm	--	lm	ll	lm	--	lm	lm	ll	ll	lm	lm	ll	lm	ll
1649	LG7	M02677	116.656	lm	ll	ll	lm	lm	ll	lm	lm	ll	--	lm	--	lm	--	--	ll	ll	ll	ll	ll	lm	--	--	lm	ll	lm	lm	lm	lm	lm	ll	lm	--	lm	ll	lm	--	lm	lm	--	ll	lm	lm	ll	lm	ll
1650	LG7	M03682	117.4	lm	ll	--	lm	lm	ll	ll	lm	ll	lm	lm	lm	lm	lm	lm	--	lm	lm	ll	ll	lm	lm	lm	lm	ll	lm	--	lm	ll	lm	ll	lm	lm	lm	ll	lm	lm	lm	lm	lm	lm	lm	lm	--	lm	ll
1651	LG7	M71985	117.912	hk	hk	hh	kk	hh	hk	kk	hk	hk	hk	kk	kk	kk	--	kk	kk	hk	hh	hk	hh	hk	kk	h-	kk	hk	hk	hk	hk	hh	hk	hk	hh	hh	hk	hh	hh	--	hh	hk	kk	kk	hk	hk	hh	kk	hh
1652	LG7	M12337	117.999	lm	ll	--	lm	lm	ll	ll	lm	ll	lm	lm	lm	lm	lm	lm	--	lm	lm	ll	ll	lm	lm	lm	lm	ll	lm	--	lm	ll	lm	ll	lm	lm	lm	ll	lm	lm	lm	lm	lm	lm	lm	lm	ll	lm	ll
1653	LG7	M62543	119.052	hk	hk	hh	kk	hh	hk	kk	hk	hk	k-	kk	kk	kk	hk	kk	kk	hk	--	hk	hh	hk	kk	hh	kk	hk	hk	hk	hk	hh	kk	k-	hh	hh	hk	hh	hh	hk	hh	hk	kk	kk	hk	--	hh	hk	hh
1654	LG7	M61876	119.45	hk	hk	h-	kk	h-	--	kk	h-	h-	--	kk	kk	kk	h-	kk	kk	h-	h-	h-	h-	h-	kk	h-	kk	h-	h-	h-	h-	h-	kk	h-	h-	h-	h-	h-	h-	h-	h-	h-	kk	kk	--	h-	h-	--	h-
1655	LG7	M09616	120.949	hk	hk	hk	kk	h-	hk	kk	h-	hk	hh	kk	kk	kk	kk	kk	kk	k-	hh	hk	hk	hk	kk	hk	hk	hk	hh	hk	hk	hk	hh	hk	hh	hh	hh	k-	hh	h-	h-	hk	kk	kk	hk	hk	hk	--	hk
1656	LG7	M53385	121.443	lm	ll	--	lm	lm	ll	lm	lm	ll	--	--	lm	lm	--	ll	--	--	--	ll	ll	lm	lm	lm	lm	ll	lm	lm	lm	lm	--	--	lm	lm	lm	ll	lm	lm	lm	lm	lm	lm	lm	lm	ll	lm	ll
1657	LG7	M08551	122.114	hk	hk	hk	hk	hh	hk	kk	--	hk	hh	kk	kk	kk	--	kk	kk	hk	--	hk	hh	hk	kk	hh	hk	hk	hh	hh	hh	hh	--	hk	hh	hh	hh	hk	hh	hh	hh	hh	kk	kk	hh	hh	hk	hh	hk
1658	LG7	M53386	122.542	lm	ll	--	lm	lm	ll	lm	lm	ll	--	--	lm	lm	--	ll	--	ll	--	ll	--	lm	lm	lm	lm	ll	lm	lm	lm	lm	--	--	lm	lm	lm	ll	lm	lm	lm	lm	lm	lm	lm	lm	ll	lm	ll
1659	LG7	M07599	122.844	lm	ll	--	ll	lm	--	ll	lm	lm	lm	ll	ll	ll	ll	ll	ll	--	lm	lm	lm	ll	ll	lm	lm	lm	lm	lm	lm	lm	lm	lm	lm	lm	--	--	lm	ll	lm	--	ll	ll	lm	--	lm	--	lm
1660	LG7	M57651	122.892	nn	np	nn	nn	nn	nn	np	np	nn	np	np	np	np	np	np	np	nn	np	nn	nn	nn	np	nn	nn	nn	np	np	np	nn	--	--	nn	nn	np	nn	nn	np	nn	np	np	np	np	np	nn	np	nn
1661	LG7	M12652	123.338	lm	ll	--	ll	lm	--	ll	lm	lm	lm	ll	ll	ll	ll	ll	ll	--	lm	lm	lm	ll	ll	lm	lm	lm	lm	lm	lm	lm	lm	lm	lm	lm	--	--	lm	ll	lm	--	ll	ll	lm	lm	lm	--	lm
1662	LG7	M53659	125.498	nn	np	nn	--	nn	nn	np	np	nn	np	np	np	np	np	np	np	nn	np	nn	nn	nn	np	nn	np	nn	np	np	np	nn	np	nn	nn	nn	np	nn	nn	np	nn	np	--	np	np	np	nn	np	nn
1663	LG7	M56862	129.991	nn	np	nn	np	nn	nn	np	np	nn	--	np	np	nn	--	--	nn	nn	--	nn	nn	nn	--	nn	nn	nn	--	nn	np	nn	--	--	nn	nn	np	nn	nn	--	nn	np	np	--	np	np	nn	np	nn
1664	LG8	M06097	0	lm	ll	--	lm	ll	ll	lm	--	ll	--	lm	lm	ll	ll	ll	ll	ll	--	ll	ll	--	ll	lm	ll	lm	lm	ll	ll	ll	ll	ll	ll	--	lm	lm	--	ll	lm	lm	ll	ll	lm	ll	lm	ll	lm
1665	LG8	M10006	2.009	nn	np	np	nn	np	np	np	nn	np	--	np	nn	np	nn	nn	nn	nn	np	np	nn	np	np	np	nn	np	np	nn	nn	nn	nn	np	nn	nn	np	nn	nn	nn	np	nn	--	nn	nn	np	np	nn	--
1666	LG8	M61806	4.597	nn	np	np	nn	np	np	np	--	np	np	np	nn	np	nn	nn	nn	nn	np	np	nn	np	np	np	nn	np	np	nn	nn	nn	nn	np	nn	nn	np	nn	nn	nn	np	nn	--	nn	nn	np	np	nn	np
1667	LG8	M05754	5.016	nn	np	np	nn	nn	nn	np	nn	nn	np	np	np	nn	--	--	--	nn	nn	nn	--	--	nn	np	--	--	np	--	nn	nn	np	np	nn	--	--	np	np	--	--	np	nn	np	np	nn	--	np	--
1668	LG8	M07194	5.668	nn	np	np	nn	nn	nn	np	nn	nn	np	np	np	nn	--	--	--	nn	nn	nn	--	--	nn	np	--	--	np	--	nn	nn	np	np	nn	--	--	np	np	--	--	np	nn	np	np	nn	--	np	--
1669	LG8	M02288	5.709	nn	np	np	nn	nn	nn	np	nn	nn	np	np	np	nn	--	--	--	nn	nn	nn	--	--	nn	np	--	--	np	--	--	nn	np	np	nn	--	--	np	np	--	--	np	nn	np	np	nn	--	np	--
1670	LG8	M64992	5.988	nn	np	np	--	np	np	np	np	np	--	np	--	--	nn	nn	nn	nn	--	np	nn	np	np	np	nn	np	np	nn	nn	nn	--	--	nn	nn	np	nn	nn	nn	np	nn	np	nn	nn	--	np	nn	np
1671	LG8	M51728	6.44	nn	np	np	nn	np	nn	--	--	np	--	--	nn	np	nn	nn	nn	np	nn	np	nn	np	nn	nn	np	np	nn	nn	nn	nn	--	np	np	nn	np	nn	--	nn	np	nn	np	nn	nn	np	--	--	np
1672	LG8	M65879	6.88	lm	ll	--	lm	lm	lm	--	lm	lm	ll	ll	ll	ll	lm	lm	lm	--	--	lm	lm	ll	lm	ll	ll	ll	ll	lm	lm	lm	--	--	lm	--	ll	ll	ll	lm	ll	ll	--	ll	ll	ll	lm	lm	ll
1673	LG8	M63411	7.61	nn	np	np	nn	np	np	np	np	np	np	np	nn	np	nn	nn	nn	nn	np	np	nn	np	np	np	nn	np	np	nn	nn	nn	nn	np	nn	nn	np	nn	nn	nn	np	nn	np	nn	nn	np	np	nn	np
1674	LG8	M62350	8.779	lm	ll	ll	lm	lm	lm	ll	lm	lm	--	ll	ll	ll	lm	lm	lm	ll	--	lm	lm	ll	lm	lm	ll	ll	ll	ll	lm	lm	ll	ll	lm	lm	ll	ll	ll	lm	ll	ll	lm	lm	ll	lm	lm	lm	ll
1675	LG8	M68100	9.116	nn	np	np	nn	np	--	np	nn	np	--	np	nn	np	nn	nn	nn	nn	np	np	nn	np	np	np	np	np	np	nn	nn	nn	nn	--	nn	nn	np	nn	nn	--	np	nn	np	nn	nn	np	np	nn	np
1676	LG8	M04843	10.212	nn	np	nn	nn	nn	nn	--	nn	nn	nn	nn	nn	nn	np	np	np	np	nn	nn	np	nn	nn	nn	nn	nn	nn	np	np	np	--	nn	np	--	nn	np	np	nn	nn	np	nn	np	np	nn	nn	np	nn
1677	LG8	M57124	11.209	nn	np	nn	nn	nn	nn	nn	nn	nn	nn	nn	np	nn	np	np	np	np	nn	nn	np	nn	nn	nn	nn	nn	nn	np	np	np	np	--	np	np	nn	np	np	np	nn	np	--	np	np	nn	nn	--	nn
1678	LG8	M65878	12.542	nn	np	--	nn	nn	nn	--	nn	nn	nn	nn	np	nn	np	np	--	--	--	nn	np	nn	nn	nn	nn	nn	nn	np	np	np	--	--	np	--	nn	np	np	np	nn	np	--	--	np	nn	nn	np	nn
1679	LG8	M07589	14.238	nn	np	np	nn	np	nn	--	nn	np	--	np	nn	--	nn	nn	nn	np	--	--	nn	np	nn	np	--	nn	np	nn	nn	np	nn	np	--	nn	nn	nn	np	nn	nn	nn	np	nn	nn	np	--	nn	np
1680	LG8	M04579	15.058	nn	np	np	nn	np	nn	--	nn	np	--	--	nn	--	nn	nn	nn	np	--	--	nn	np	np	np	--	nn	np	nn	nn	np	nn	np	--	nn	nn	nn	np	nn	nn	nn	np	nn	nn	np	--	nn	np
1681	LG8	M51320	16.297	nn	np	--	np	nn	nn	nn	nn	nn	nn	nn	--	nn	--	--	np	--	--	nn	np	nn	nn	nn	nn	nn	nn	np	np	--	--	nn	np	--	nn	np	np	--	nn	np	--	np	np	--	--	np	nn
1682	LG8	M06549	16.481	lm	ll	--	ll	ll	ll	ll	--	ll	--	lm	--	ll	ll	ll	ll	ll	--	ll	ll	lm	ll	lm	--	lm	lm	ll	ll	ll	--	--	ll	ll	ll	lm	lm	--	lm	--	ll	ll	lm	ll	lm	ll	lm
1683	LG8	M51318	16.75	nn	np	--	np	nn	nn	nn	nn	nn	nn	nn	--	nn	--	--	np	--	--	nn	np	nn	nn	nn	nn	nn	nn	np	np	--	--	nn	np	--	nn	np	np	--	nn	np	--	np	np	--	--	np	nn
1684	LG8	M02498	17.385	nn	np	np	nn	np	nn	np	np	np	np	np	nn	np	--	nn	nn	--	--	np	nn	np	np	np	np	np	np	nn	nn	np	--	--	np	--	np	nn	np	--	np	nn	--	nn	nn	np	np	nn	np
1685	LG8	M55213	17.56	lm	ll	--	ll	ll	ll	lm	ll	ll	lm	lm	--	ll	ll	ll	ll	lm	ll	ll	ll	lm	ll	lm	lm	lm	lm	ll	ll	ll	lm	--	ll	ll	--	lm	lm	ll	--	lm	ll	ll	--	ll	--	ll	lm
1686	LG8	M06852	19.252	nn	np	nn	np	nn	np	nn	nn	nn	nn	nn	np	nn	--	np	np	--	--	nn	np	nn	nn	nn	nn	nn	nn	np	nn	nn	--	nn	nn	--	nn	--	nn	--	nn	nn	--	np	np	nn	nn	np	nn
1687	LG8	M01108	19.864	nn	np	nn	np	nn	np	nn	nn	nn	nn	nn	np	nn	--	np	np	--	--	nn	np	nn	nn	nn	nn	nn	nn	np	nn	nn	--	nn	nn	--	nn	--	nn	--	nn	nn	--	np	np	nn	nn	np	nn
1688	LG8	M11269	20.173	nn	np	nn	nn	nn	np	nn	nn	nn	nn	nn	np	nn	--	np	np	--	--	nn	np	nn	nn	nn	nn	nn	nn	np	nn	nn	--	nn	nn	--	nn	--	nn	--	nn	nn	--	np	np	nn	nn	np	nn
1689	LG8	M58009	20.879	nn	np	nn	nn	nn	np	nn	nn	nn	nn	nn	np	nn	np	np	np	--	nn	nn	np	nn	nn	nn	nn	nn	nn	np	np	nn	np	nn	nn	nn	nn	np	nn	np	nn	np	nn	np	np	nn	nn	np	nn
1690	LG8	M62311	21.871	nn	np	np	nn	np	nn	np	np	np	np	np	nn	np	nn	nn	nn	np	np	np	nn	np	np	np	np	np	np	nn	nn	np	nn	np	np	nn	np	nn	np	nn	np	nn	--	nn	nn	np	np	nn	np
1691	LG8	M68752	22.681	nn	np	np	nn	np	nn	np	--	np	--	np	nn	np	nn	nn	nn	np	--	np	nn	--	np	np	np	np	np	nn	nn	np	nn	np	np	nn	np	nn	np	nn	--	nn	--	nn	nn	np	np	nn	np
1692	LG8	M68751	22.774	nn	np	np	nn	np	nn	np	--	np	--	np	nn	np	nn	nn	nn	np	--	np	nn	--	np	np	np	np	np	nn	nn	np	nn	np	np	nn	np	nn	np	nn	--	nn	np	nn	nn	np	np	nn	np
1693	LG8	M00341	23.752	nn	np	np	nn	np	nn	np	np	np	np	np	nn	np	nn	nn	nn	np	--	np	nn	np	np	np	np	np	np	nn	nn	np	--	--	np	nn	np	nn	np	nn	np	nn	--	nn	nn	np	np	nn	np
1694	LG8	M04903	24.057	hk	hk	hk	hk	hk	hk	h-	k-	hk	--	hk	hh	hk	--	hk	hk	hk	hk	kk	h-	kk	kk	hk	hk	kk	hk	hk	hk	hk	hh	--	kk	--	hk	hh	hk	hk	--	hh	kk	hk	hh	k-	h-	kk	hk
1695	LG8	M08429	24.204	hk	hk	hk	hk	hk	hk	h-	k-	hk	--	hk	hh	hk	--	hk	hk	hk	hk	kk	h-	kk	kk	hk	hk	kk	hk	hk	hk	hk	hh	--	kk	--	hk	hh	hk	hk	--	hk	kk	hk	h-	kk	hk	kk	hk
1696	LG8	M63408	25.005	nn	np	nn	nn	nn	np	nn	nn	nn	nn	nn	np	nn	np	np	np	nn	nn	nn	np	nn	nn	nn	nn	nn	nn	np	np	nn	--	nn	nn	--	nn	np	nn	np	nn	np	nn	np	np	--	nn	np	nn
1697	LG8	M72930	25.614	nn	np	nn	nn	nn	np	nn	nn	nn	--	nn	np	nn	nn	np	np	nn	nn	nn	--	nn	nn	nn	nn	nn	nn	np	np	nn	--	--	nn	np	nn	np	nn	np	nn	np	--	np	np	nn	nn	np	nn
1698	LG8	M72928	25.792	nn	np	nn	nn	nn	np	nn	nn	nn	--	nn	np	nn	nn	np	np	nn	nn	nn	--	nn	nn	nn	nn	nn	nn	np	np	nn	--	--	nn	np	nn	np	nn	np	nn	np	--	np	np	nn	nn	np	nn
1699	LG8	M01282	26.374	lm	ll	lm	ll	ll	ll	lm	ll	ll	lm	lm	lm	ll	ll	ll	ll	lm	lm	ll	ll	lm	ll	lm	lm	lm	lm	ll	ll	ll	lm	lm	ll	ll	--	lm	lm	ll	--	--	ll	ll	lm	ll	lm	ll	lm
1700	LG8	M61677	27.212	nn	np	nn	nn	nn	np	nn	nn	nn	nn	nn	np	nn	--	np	--	nn	nn	nn	--	nn	nn	nn	nn	nn	--	np	np	nn	--	nn	nn	np	nn	nn	nn	np	nn	np	nn	--	np	nn	nn	nn	nn
1701	LG8	M09879	27.411	lm	ll	lm	ll	ll	ll	lm	ll	ll	lm	lm	lm	ll	ll	ll	ll	lm	--	ll	ll	lm	ll	lm	lm	lm	lm	ll	ll	ll	lm	lm	ll	lm	lm	lm	lm	ll	lm	lm	lm	ll	lm	ll	lm	ll	lm
1702	LG8	M63704	28.233	lm	ll	ll	lm	lm	--	ll	lm	lm	ll	ll	ll	lm	lm	lm	lm	ll	--	lm	lm	ll	lm	ll	ll	ll	ll	lm	lm	lm	ll	ll	lm	ll	ll	ll	ll	ll	ll	ll	ll	lm	ll	lm	ll	lm	ll
1703	LG8	M05337	28.34	nn	np	nn	np	nn	np	nn	nn	nn	--	nn	np	nn	np	np	np	nn	nn	nn	np	nn	nn	nn	nn	nn	np	np	np	nn	np	nn	nn	np	nn	np	nn	--	nn	np	nn	--	np	np	--	nn	nn
1704	LG8	M02031	28.356	nn	np	nn	np	nn	np	nn	nn	nn	--	nn	np	nn	np	np	np	nn	nn	nn	np	nn	nn	nn	nn	nn	np	np	np	nn	np	nn	nn	np	nn	np	nn	--	nn	np	nn	np	np	np	np	nn	nn
1705	LG8	M64759	28.97	hk	hk	kk	hh	hk	hh	hk	h-	hk	hk	hk	hk	hk	hh	hh	hh	kk	--	hk	hh	kk	hk	kk	kk	kk	h-	hh	hh	hh	hk	hk	hk	h-	hk	hk	hk	hh	kk	hk	kk	hh	hk	hk	kk	hk	kk
1706	LG8	M64758	28.971	hk	hk	kk	hh	hk	hh	hk	h-	hk	hk	hk	hk	hk	hh	hh	hh	kk	--	hk	hh	kk	hk	kk	kk	kk	h-	hh	hh	hh	hk	hk	hk	h-	hk	hk	hk	hh	kk	hk	kk	hh	hk	hk	kk	hk	kk
1707	LG8	M06966	29.092	lm	ll	lm	--	ll	ll	lm	ll	ll	lm	lm	lm	--	ll	ll	--	lm	lm	--	ll	lm	--	lm	--	lm	lm	ll	ll	lm	lm	lm	--	--	lm	lm	lm	lm	lm	lm	lm	ll	lm	--	lm	ll	lm
1708	LG8	M11859	29.135	lm	ll	lm	--	ll	ll	lm	ll	ll	lm	lm	lm	ll	ll	ll	--	lm	lm	--	ll	lm	--	lm	--	lm	lm	ll	ll	lm	lm	lm	--	--	lm	lm	lm	lm	lm	lm	lm	ll	lm	--	lm	ll	lm
1709	LG8	M03670	29.305	lm	ll	lm	--	ll	ll	lm	ll	ll	lm	lm	lm	ll	ll	ll	--	lm	lm	--	ll	lm	--	lm	--	lm	lm	ll	ll	lm	lm	lm	--	--	lm	lm	lm	lm	lm	lm	lm	ll	lm	--	lm	ll	lm
1710	LG8	M01428	29.4	lm	ll	lm	--	ll	ll	lm	ll	ll	lm	lm	lm	ll	ll	ll	--	lm	lm	--	ll	lm	--	lm	--	lm	lm	ll	ll	lm	lm	lm	--	--	lm	lm	lm	lm	lm	lm	lm	ll	lm	--	lm	ll	lm
1711	LG8	M09065	29.541	lm	ll	lm	--	ll	ll	lm	ll	ll	lm	lm	lm	ll	ll	ll	--	lm	lm	--	ll	lm	--	lm	--	lm	lm	ll	ll	lm	lm	lm	--	--	lm	lm	lm	lm	lm	lm	lm	ll	lm	--	lm	ll	lm
1712	LG8	M05908	29.61	lm	ll	lm	--	ll	ll	lm	ll	ll	lm	lm	lm	ll	ll	ll	--	--	lm	--	ll	lm	--	lm	--	lm	lm	ll	ll	lm	lm	lm	ll	--	lm	lm	lm	--	lm	lm	lm	ll	lm	--	lm	ll	lm
1713	LG8	M04883	29.62	nn	np	nn	np	nn	--	--	--	nn	nn	nn	np	nn	nn	np	--	--	np	nn	--	nn	nn	--	nn	nn	nn	--	np	--	np	--	nn	np	nn	np	nn	--	nn	np	--	np	np	np	--	nn	nn
1714	LG8	M07625	29.901	lm	ll	lm	ll	ll	ll	lm	ll	ll	lm	lm	lm	ll	ll	ll	ll	--	lm	ll	ll	lm	ll	ll	lm	lm	lm	ll	ll	ll	lm	lm	ll	lm	lm	lm	lm	ll	--	lm	ll	ll	lm	ll	lm	ll	lm
1715	LG8	M07501	30.628	nn	np	nn	nn	nn	np	nn	nn	nn	nn	nn	np	nn	np	np	np	np	nn	nn	np	nn	nn	nn	nn	nn	np	np	np	nn	np	nn	nn	np	nn	np	nn	np	nn	np	nn	np	np	nn	nn	nn	nn
1716	LG8	M01827	31.019	lm	ll	ll	lm	lm	lm	ll	--	lm	--	ll	lm	lm	lm	lm	lm	ll	ll	lm	lm	ll	lm	ll	ll	ll	lm	lm	lm	lm	lm	ll	lm	lm	ll	lm	ll	lm	ll	lm	ll	lm	lm	lm	ll	lm	ll
1717	LG8	M05189	31.251	nn	np	nn	np	nn	np	nn	nn	nn	nn	nn	np	nn	nn	np	np	nn	nn	nn	np	nn	nn	nn	nn	nn	np	np	np	nn	np	nn	nn	np	nn	np	nn	np	nn	np	nn	np	np	nn	nn	nn	nn
1718	LG8	M03200	31.427	hk	hk	kk	hh	hk	hh	kk	hk	k-	kk	kk	hk	hk	--	hh	hh	kk	k-	hk	h-	kk	hk	kk	kk	kk	hk	hh	hh	hk	hk	kk	hk	hk	kk	kk	kk	hh	hk	hk	kk	hh	hk	hk	kk	hk	kk
1719	LG8	M00770	31.482	lm	ll	lm	--	lm	ll	lm	--	lm	lm	lm	lm	lm	ll	ll	ll	lm	--	lm	ll	lm	lm	lm	lm	lm	lm	ll	ll	lm	--	lm	lm	lm	lm	lm	lm	ll	lm	--	lm	ll	lm	lm	lm	--	lm
1720	LG8	M09304	31.528	hk	hk	hh	kk	hk	kk	hh	k-	hk	hh	hh	hk	hk	kk	kk	kk	hh	--	hk	kk	hh	hk	hh	hh	hh	hk	kk	kk	hk	hk	hh	hh	hk	hh	hk	hh	kk	hh	hk	hh	kk	hk	hh	hh	hk	hh
1721	LG8	M08611	31.986	hk	hk	kk	hh	hk	hh	kk	hk	hk	kk	kk	hk	hk	hh	hh	hh	kk	--	hk	hh	kk	hk	kk	kk	kk	hh	hh	hh	hk	kk	kk	kk	--	kk	hk	kk	hh	kk	hk	kk	hh	hk	kk	kk	hk	kk
1722	LG8	M53806	32.057	lm	ll	lm	ll	ll	ll	--	ll	ll	lm	--	--	ll	ll	ll	ll	--	--	ll	ll	ll	ll	lm	--	lm	lm	ll	ll	ll	ll	lm	ll	lm	lm	lm	lm	lm	ll	lm	lm	ll	lm	ll	--	ll	--
1723	LG8	M50545	32.129	nn	np	nn	--	nn	np	nn	--	nn	--	nn	np	nn	--	np	nn	nn	--	nn	np	nn	nn	nn	nn	nn	--	nn	np	nn	np	--	nn	--	--	np	nn	--	nn	nn	nn	np	np	--	nn	nn	nn
1724	LG8	M61686	32.534	nn	np	nn	nn	nn	np	nn	nn	nn	nn	nn	nn	nn	np	np	np	nn	nn	nn	np	nn	nn	nn	nn	nn	np	np	np	nn	np	nn	nn	--	nn	np	nn	np	nn	np	nn	np	--	nn	nn	nn	nn
1725	LG8	M03091	32.905	nn	np	np	np	np	nn	nn	--	nn	np	np	--	np	--	nn	nn	np	--	--	nn	np	np	nn	np	np	np	nn	nn	np	--	--	--	--	np	np	np	--	--	--	np	nn	np	np	np	--	np
1726	LG8	M00508	33.003	nn	np	np	np	np	nn	nn	--	nn	np	np	--	np	--	nn	nn	np	--	--	nn	np	np	nn	np	np	--	nn	nn	np	--	--	--	--	np	np	np	--	--	--	np	nn	np	np	--	--	np
1727	LG8	M07554	33.063	nn	np	np	np	np	nn	nn	--	nn	np	np	--	np	--	nn	nn	np	--	--	nn	np	np	nn	np	np	np	nn	nn	np	--	--	--	--	np	np	np	--	--	--	np	nn	np	np	np	--	np
1728	LG8	M03913	33.118	lm	ll	lm	--	lm	--	--	lm	--	lm	lm	ll	lm	--	lm	--	--	lm	lm	lm	lm	lm	lm	lm	lm	ll	lm	--	lm	ll	--	lm	ll	lm	ll	lm	lm	lm	ll	lm	lm	ll	lm	lm	lm	lm
1729	LG8	M08613	33.311	hk	hk	h-	kk	hk	kk	hh	hk	hk	hh	hh	hk	hk	kk	kk	kk	hk	hh	hk	kk	hh	hk	hh	hh	hh	hk	kk	kk	hk	hk	hh	hk	hk	hh	hk	hh	kk	hk	hk	hh	kk	hk	hk	hh	hk	hh
1730	LG8	M11544	33.696	nn	np	nn	nn	nn	np	--	np	nn	--	nn	np	nn	--	--	--	nn	--	nn	np	nn	nn	nn	nn	nn	np	np	np	nn	--	nn	nn	--	--	--	nn	nn	nn	np	nn	--	--	--	nn	nn	nn
1731	LG8	cms13403	34.812	lm	ll	ll	lm	ll	ll	lm	ll	ll	lm	lm	ll	ll	ll	ll	ll	lm	lm	ll	ll	lm	ll	lm	lm	lm	lm	ll	ll	ll	lm	lm	ll	lm	lm	lm	lm	ll	ll	lm	ll	ll	--	ll	lm	ll	lm
1732	LG8	M04549	35.484	nn	np	nn	np	nn	np	nn	nn	nn	nn	nn	np	nn	--	np	np	nn	nn	nn	np	nn	nn	nn	nn	nn	--	np	np	nn	np	nn	nn	np	nn	nn	nn	--	nn	np	nn	np	np	nn	nn	nn	nn
1733	LG8	M11538	35.592	lm	ll	lm	lm	lm	lm	lm	lm	lm	--	lm	--	lm	lm	lm	--	lm	lm	lm	lm	lm	lm	--	--	lm	ll	lm	--	--	ll	lm	lm	ll	lm	ll	lm	lm	lm	ll	ll	lm	ll	lm	lm	lm	lm
1734	LG8	M72251	36.177	nn	np	nn	nn	nn	np	nn	nn	np	nn	nn	np	nn	np	np	np	--	nn	nn	np	nn	nn	nn	nn	nn	np	np	np	nn	np	nn	nn	np	nn	np	nn	np	nn	np	nn	--	np	nn	nn	nn	nn
1735	LG8	M64860	36.526	hk	hk	hk	hh	hh	hk	hh	hh	hk	--	hk	kk	hh	hk	hk	hk	h-	--	hh	hk	hk	hh	hk	hk	hk	kk	hk	hk	hh	kk	hk	hh	kk	hk	kk	hk	hk	hh	kk	hk	hk	kk	hh	hk	hh	hk
1736	LG8	M64724	36.928	nn	np	nn	nn	nn	np	nn	--	np	--	nn	np	nn	nn	np	np	nn	--	nn	np	nn	nn	nn	nn	nn	np	np	np	nn	np	nn	nn	np	nn	np	nn	np	nn	np	nn	np	np	nn	nn	nn	nn
1737	LG8	cms13406	37.684	nn	np	np	np	nn	np	nn	nn	np	nn	nn	np	nn	np	np	np	nn	nn	nn	np	nn	nn	nn	nn	nn	np	nn	np	nn	np	nn	nn	np	nn	np	nn	np	nn	--	--	np	np	nn	nn	nn	nn
1738	LG8	M70305	38.171	nn	np	--	nn	nn	np	nn	nn	np	--	nn	np	nn	--	np	np	nn	--	nn	np	--	nn	nn	nn	nn	np	np	np	nn	np	--	nn	np	--	np	nn	--	nn	np	nn	np	np	nn	nn	nn	nn
1739	LG8	M08780	38.261	lm	ll	lm	ll	ll	ll	lm	ll	ll	lm	lm	ll	ll	--	ll	ll	lm	--	ll	ll	lm	ll	lm	lm	lm	lm	ll	ll	lm	--	--	ll	lm	lm	lm	lm	ll	ll	lm	ll	ll	lm	ll	lm	ll	lm
1740	LG8	M04224	38.281	lm	ll	lm	ll	ll	ll	lm	ll	ll	lm	lm	ll	ll	--	ll	ll	lm	--	ll	ll	lm	ll	lm	lm	lm	lm	ll	ll	lm	--	--	ll	lm	lm	lm	lm	ll	ll	lm	ll	ll	lm	ll	lm	ll	lm
1741	LG8	M08093	38.546	nn	np	nn	np	nn	np	nn	nn	np	nn	nn	np	nn	np	np	np	nn	nn	nn	np	nn	nn	nn	nn	nn	np	np	np	nn	--	nn	nn	np	nn	np	nn	np	nn	np	nn	np	np	nn	nn	nn	nn
1742	LG8	M03553	38.989	lm	ll	lm	--	ll	ll	lm	ll	ll	lm	lm	ll	ll	ll	ll	ll	lm	lm	ll	ll	lm	ll	lm	lm	lm	lm	ll	ll	lm	lm	lm	ll	lm	lm	lm	lm	ll	ll	--	lm	ll	lm	ll	lm	ll	lm
1743	LG8	M00987	39.059	lm	ll	lm	--	ll	ll	lm	ll	ll	lm	--	ll	ll	ll	ll	ll	lm	lm	ll	ll	lm	ll	lm	lm	lm	lm	ll	ll	lm	lm	lm	ll	lm	lm	lm	lm	ll	ll	--	lm	ll	lm	ll	lm	ll	lm
1744	LG8	M01195	39.363	nn	np	nn	np	nn	np	nn	nn	np	nn	nn	np	nn	np	np	np	nn	nn	nn	np	nn	nn	nn	nn	nn	np	np	np	nn	np	nn	nn	np	nn	np	nn	np	nn	np	nn	np	np	nn	nn	nn	nn
1745	LG8	M00523	40.321	lm	ll	lm	--	ll	ll	lm	ll	ll	lm	lm	ll	ll	ll	ll	ll	lm	lm	ll	ll	lm	ll	lm	lm	lm	lm	ll	ll	lm	lm	lm	ll	lm	lm	lm	lm	ll	ll	lm	lm	ll	lm	ll	lm	ll	lm
1746	LG8	M69423	40.501	nn	np	nn	nn	nn	np	nn	nn	np	nn	nn	np	nn	np	np	np	nn	--	nn	np	nn	nn	nn	nn	nn	np	np	np	nn	np	nn	nn	np	nn	np	nn	np	nn	np	--	np	np	nn	nn	nn	nn
1747	LG8	M04971	41.43	hk	hk	hk	kk	kk	hk	hk	kk	hk	hk	hk	hk	kk	hk	hk	hk	hk	--	kk	hk	hk	kk	hk	hk	hk	h-	hk	hk	hk	hk	hk	kk	hh	hk	hh	hk	hk	kk	hh	hk	hk	hh	kk	hk	kk	hk
1748	LG8	M06717	41.798	lm	ll	lm	lm	ll	ll	lm	ll	ll	lm	lm	ll	ll	ll	ll	ll	lm	lm	ll	ll	lm	ll	lm	lm	lm	lm	ll	ll	lm	lm	lm	ll	lm	lm	lm	lm	ll	ll	lm	lm	ll	lm	ll	lm	ll	lm
1749	LG8	M71859	44.049	lm	ll	lm	ll	ll	ll	lm	ll	ll	lm	lm	ll	ll	ll	ll	ll	--	lm	ll	ll	lm	ll	lm	lm	lm	lm	ll	ll	lm	ll	--	ll	lm	lm	lm	lm	--	ll	lm	lm	ll	lm	lm	lm	--	lm
1750	LG8	cms13435	45.049	nn	np	np	np	nn	np	nn	nn	np	np	nn	np	nn	np	np	np	nn	nn	nn	np	nn	nn	nn	nn	nn	np	np	np	nn	np	nn	nn	np	nn	np	nn	nn	np	np	nn	np	nn	nn	nn	nn	nn
1751	LG8	M07520	45.156	lm	ll	lm	ll	ll	lm	lm	--	ll	lm	lm	ll	ll	ll	ll	ll	lm	--	ll	ll	lm	ll	lm	lm	lm	lm	ll	ll	lm	ll	lm	ll	lm	lm	lm	lm	ll	ll	lm	lm	ll	lm	lm	lm	ll	lm
1752	LG8	M69530	46.1	nn	np	nn	nn	nn	np	nn	nn	np	--	nn	np	nn	np	np	np	nn	nn	nn	np	nn	nn	nn	nn	nn	np	np	np	nn	np	nn	nn	np	nn	np	nn	nn	np	np	np	np	nn	nn	nn	nn	nn
1753	LG8	M73000	46.114	lm	ll	lm	ll	ll	lm	--	ll	ll	ll	lm	ll	ll	ll	ll	ll	lm	lm	ll	ll	lm	ll	lm	lm	lm	lm	ll	ll	lm	ll	lm	ll	lm	lm	lm	lm	ll	ll	lm	lm	ll	lm	ll	lm	ll	lm
1754	LG8	M04733	46.787	lm	ll	lm	ll	ll	lm	lm	ll	ll	lm	lm	ll	ll	ll	ll	ll	lm	lm	ll	ll	lm	ll	lm	lm	lm	lm	ll	ll	lm	ll	lm	ll	lm	lm	lm	lm	ll	ll	lm	lm	ll	lm	ll	lm	ll	lm
1755	LG8	M02428	47.403	nn	np	nn	np	np	--	nn	nn	np	--	nn	np	nn	--	np	np	nn	--	nn	--	nn	nn	nn	nn	nn	np	--	nn	nn	np	nn	nn	np	nn	np	nn	--	nn	np	np	np	nn	nn	nn	nn	nn
1756	LG8	M68970	48.016	nn	np	nn	np	nn	np	nn	nn	np	np	nn	np	nn	np	np	np	--	--	nn	np	nn	nn	--	nn	nn	np	np	np	nn	np	--	nn	np	nn	np	nn	nn	np	np	np	np	nn	nn	nn	nn	nn
1757	LG8	M09357	48.068	lm	ll	lm	ll	ll	lm	--	ll	ll	--	lm	ll	ll	ll	ll	ll	lm	lm	ll	ll	lm	ll	lm	lm	lm	lm	ll	ll	lm	ll	lm	ll	lm	lm	lm	lm	lm	ll	lm	lm	ll	lm	ll	lm	ll	lm
1758	LG8	M12372	48.495	hk	hk	hk	h-	hk	kk	hk	hh	hk	kk	hk	hk	hh	hk	hk	hk	hk	--	hh	hk	hk	hh	hk	hk	hk	kk	hk	hh	hk	hk	hk	hk	kk	hk	kk	hk	hk	hk	kk	kk	hk	hk	hh	hk	hh	hk
1759	LG8	M54208	48.745	hk	hk	h-	hh	hk	kk	k-	--	h-	--	hk	hh	hh	--	hk	h-	hk	--	hh	hk	--	h-	hk	hk	hk	kk	hh	hh	hk	h-	--	hk	kk	hk	k-	hk	--	hk	kk	--	hk	hk	hh	hk	hh	hk
1760	LG8	M05140	49.025	lm	ll	lm	ll	ll	lm	lm	ll	ll	lm	lm	ll	ll	ll	ll	ll	lm	lm	ll	ll	lm	ll	lm	lm	lm	lm	ll	ll	lm	ll	lm	ll	lm	lm	lm	lm	lm	ll	lm	lm	ll	lm	ll	lm	ll	lm
1761	LG8	M54206	49.764	nn	np	nn	nn	np	np	np	--	--	--	nn	nn	nn	--	np	--	nn	--	nn	np	--	--	nn	nn	nn	np	nn	nn	nn	--	--	nn	np	nn	np	nn	--	np	np	--	np	nn	nn	nn	nn	nn
1762	LG8	M71854	49.928	lm	ll	lm	ll	ll	lm	--	ll	ll	lm	lm	ll	ll	ll	ll	ll	lm	lm	ll	ll	lm	ll	lm	lm	lm	--	ll	ll	lm	ll	lm	ll	lm	lm	lm	lm	lm	ll	lm	--	ll	lm	ll	lm	ll	lm
1763	LG8	M62078	50.629	hk	hk	hk	kk	hk	hh	hk	kk	hk	--	hk	hk	kk	hk	hk	hk	--	--	kk	hk	hk	kk	hk	hk	hk	hh	hk	kk	hk	hk	--	hk	hh	hk	h-	hk	hk	hk	hh	hh	k-	hk	kk	hk	kk	hk
1764	LG8	M50467	51.337	lm	ll	--	ll	ll	lm	lm	ll	ll	lm	lm	ll	ll	ll	ll	ll	lm	--	ll	ll	lm	ll	lm	--	lm	lm	ll	ll	lm	ll	lm	lm	lm	lm	lm	lm	lm	ll	lm	lm	ll	lm	--	lm	ll	lm
1765	LG8	M61042	51.604	nn	np	nn	nn	np	np	nn	nn	np	--	nn	np	nn	np	np	np	nn	nn	nn	np	nn	nn	nn	nn	nn	np	np	nn	nn	--	nn	nn	np	nn	np	nn	nn	np	np	np	np	nn	nn	nn	nn	nn
1766	LG8	M56250	53.46	nn	np	nn	nn	--	np	nn	nn	--	--	nn	nn	nn	--	nn	np	nn	nn	nn	--	nn	nn	nn	nn	--	np	np	nn	nn	np	nn	nn	np	nn	--	nn	nn	np	np	--	--	nn	nn	nn	nn	nn
1767	LG8	M07271	54.538	lm	ll	lm	lm	lm	ll	lm	lm	lm	ll	lm	lm	lm	ll	lm	lm	lm	lm	lm	lm	lm	lm	lm	lm	lm	lm	ll	lm	--	lm	lm	--	ll	--	ll	--	lm	lm	ll	ll	lm	--	lm	lm	lm	lm
1768	LG8	M69772	55.273	nn	np	nn	nn	np	np	nn	nn	np	np	nn	np	nn	np	nn	np	nn	--	nn	np	nn	nn	nn	nn	nn	np	np	nn	nn	np	nn	nn	np	nn	np	nn	nn	np	np	np	np	nn	nn	nn	nn	nn
1769	LG8	M69771	55.566	hk	hk	hk	kk	hk	hh	hk	kk	hk	hh	kk	hk	kk	hk	kk	hk	kk	--	kk	hk	hk	kk	hk	hk	hk	hk	hk	kk	hk	hk	hk	hk	hh	hk	hh	hk	hk	hk	hh	hh	hk	hk	kk	hk	kk	hk
1770	LG8	M00376	56.075	lm	ll	lm	ll	ll	lm	lm	ll	lm	lm	ll	ll	ll	ll	ll	ll	ll	--	ll	ll	lm	ll	lm	lm	lm	ll	ll	ll	lm	ll	--	lm	lm	lm	lm	lm	lm	ll	--	lm	ll	lm	ll	lm	ll	lm
1771	LG8	M12580	56.165	nn	np	nn	nn	--	--	nn	nn	np	np	nn	--	nn	np	nn	np	nn	--	nn	np	nn	nn	nn	nn	np	np	np	nn	nn	np	nn	nn	np	nn	np	nn	nn	np	np	--	np	nn	nn	nn	--	nn
1772	LG8	M04525	56.691	nn	np	nn	nn	np	np	nn	nn	np	np	nn	np	nn	nn	nn	np	nn	--	nn	--	nn	nn	nn	nn	np	np	np	nn	nn	np	--	nn	np	nn	np	nn	nn	np	np	np	--	nn	nn	nn	nn	nn
1773	LG8	M05237	56.731	lm	ll	lm	ll	ll	lm	lm	ll	ll	--	ll	ll	ll	ll	ll	ll	ll	ll	ll	ll	lm	ll	lm	lm	lm	ll	ll	ll	lm	ll	lm	lm	lm	lm	lm	--	lm	ll	lm	lm	ll	lm	ll	lm	ll	lm
1774	LG8	M62401	56.768	lm	ll	ll	lm	ll	--	ll	ll	lm	lm	ll	ll	lm	lm	ll	ll	ll	--	ll	ll	ll	ll	ll	lm	lm	ll	ll	ll	lm	ll	ll	lm	--	lm	lm	lm	ll	ll	lm	--	ll	lm	ll	lm	ll	lm
1775	LG8	M12430	57.356	nn	np	np	nn	np	nn	np	np	nn	nn	--	--	np	nn	np	nn	np	--	np	np	nn	nn	np	--	nn	np	np	np	--	--	np	np	nn	np	nn	--	--	nn	nn	nn	np	nn	np	np	--	np
1776	LG8	M04726	57.537	nn	np	nn	np	np	np	nn	nn	np	np	nn	np	nn	nn	nn	np	nn	--	nn	--	nn	nn	nn	nn	np	np	np	nn	nn	np	--	nn	np	nn	np	nn	nn	np	np	np	--	nn	nn	nn	nn	nn
1777	LG8	M06726	58.213	lm	ll	lm	ll	ll	lm	lm	ll	lm	lm	ll	ll	ll	ll	ll	ll	ll	--	ll	ll	lm	ll	lm	--	lm	ll	ll	ll	lm	ll	lm	--	lm	lm	lm	lm	lm	ll	lm	lm	ll	lm	ll	lm	ll	lm
1778	LG8	M06429	58.728	nn	np	--	nn	np	np	nn	--	np	--	nn	np	nn	--	nn	np	nn	np	nn	--	nn	nn	nn	nn	np	np	np	nn	nn	--	--	nn	np	nn	np	nn	nn	nn	np	np	np	nn	nn	nn	nn	nn
1779	LG8	M69973	59.221	hk	hk	hk	kk	hk	kk	hk	hh	kk	kk	hh	hk	hh	kk	hh	hk	hh	hh	hh	hk	hk	hh	hk	hk	kk	hk	hk	hh	hk	hk	kk	hk	kk	hk	kk	hk	hk	hk	kk	kk	hk	hk	hh	hk	hh	hk
1780	LG8	M03925	59.311	nn	np	--	nn	np	np	nn	--	np	--	nn	np	nn	--	nn	np	nn	np	nn	--	nn	nn	nn	nn	np	np	np	nn	nn	--	--	nn	np	nn	np	nn	nn	nn	np	--	np	nn	nn	nn	nn	nn
1781	LG8	M02628	59.87	lm	ll	lm	--	--	lm	ll	ll	lm	lm	ll	ll	lm	ll	ll	--	ll	ll	ll	--	--	ll	lm	lm	lm	lm	lm	ll	lm	lm	lm	lm	--	lm	lm	lm	lm	ll	lm	lm	ll	lm	ll	lm	ll	lm
1782	LG8	M01888	60.346	nn	np	nn	nn	np	np	nn	nn	np	np	nn	--	nn	nn	nn	np	--	--	nn	np	nn	nn	nn	nn	np	np	np	nn	nn	np	np	nn	np	nn	np	nn	nn	np	np	np	np	nn	nn	nn	nn	nn
1783	LG8	M02395	60.489	nn	np	nn	nn	np	np	nn	nn	np	np	nn	--	nn	nn	nn	np	--	--	nn	np	nn	nn	nn	nn	np	np	np	nn	nn	np	np	nn	np	nn	np	nn	nn	np	np	np	np	nn	nn	nn	nn	nn
1784	LG8	M51617	61.139	nn	np	nn	np	np	np	nn	nn	np	np	nn	np	nn	np	nn	np	nn	nn	nn	np	nn	nn	nn	nn	np	np	np	nn	nn	np	np	nn	np	nn	np	nn	nn	np	np	np	np	nn	nn	nn	nn	nn
1785	LG8	M71380	61.347	lm	ll	lm	lm	lm	lm	ll	ll	lm	lm	ll	lm	lm	lm	ll	lm	ll	ll	ll	lm	lm	ll	lm	lm	lm	lm	lm	ll	lm	lm	lm	--	lm	lm	lm	--	lm	ll	lm	lm	lm	lm	ll	lm	ll	lm
1786	LG8	M11866	61.836	hk	hk	hk	hk	hk	hh	kk	kk	hh	hh	kk	hh	hk	hh	kk	hk	k-	--	kk	hk	hk	kk	hk	hk	hh	hk	hk	kk	hk	hk	hh	hk	hh	hk	hh	hk	hk	hk	hh	hh	hk	hk	kk	hk	kk	hk
1787	LG8	M02225	62.277	nn	np	nn	nn	np	np	nn	nn	np	--	nn	np	nn	np	nn	np	nn	nn	nn	np	nn	nn	nn	nn	np	np	np	nn	nn	np	np	nn	--	nn	np	--	nn	nn	np	np	np	nn	nn	nn	nn	nn
1788	LG8	M05250	62.393	hk	hk	hk	hk	hk	hh	kk	kk	hh	hh	kk	hk	hk	hh	kk	hk	kk	kk	kk	hk	hk	kk	hk	hk	hh	hk	hk	kk	hk	hk	hh	hk	hh	hk	hh	hk	hk	hk	hh	hh	hk	hk	kk	hk	kk	hk
1789	LG8	M51294	62.495	lm	ll	ll	ll	lm	ll	lm	lm	ll	ll	lm	lm	--	--	lm	lm	lm	--	lm	ll	lm	lm	lm	--	ll	--	lm	lm	lm	lm	ll	ll	ll	lm	ll	ll	lm	ll	ll	--	ll	lm	lm	lm	lm	ll
1790	LG8	M72239	62.657	hk	hk	hk	hk	hk	kk	hh	hh	kk	k-	hh	hk	hk	k-	hh	hk	hh	--	hh	hk	hk	hh	hk	hk	kk	hk	hk	hh	hk	--	--	hk	kk	hk	k-	hk	hk	hk	kk	kk	hk	hk	hh	hk	hh	hk
1791	LG8	M66830	62.889	hk	hk	hk	kk	hk	kk	hh	hh	kk	kk	hh	hk	hk	kk	hh	hk	hh	--	hh	hk	hk	hh	hk	hk	kk	hk	hk	hh	hk	k-	kk	hk	kk	hk	kk	hk	--	hk	kk	kk	hk	hk	hh	hk	hh	hk
1792	LG8	M68342	63.204	nn	np	--	--	np	np	--	--	np	np	nn	nn	nn	np	nn	np	--	--	nn	np	nn	nn	nn	nn	np	np	np	nn	nn	np	--	nn	np	nn	np	nn	--	nn	--	nn	np	--	nn	nn	--	nn
1793	LG8	M08156	63.634	lm	ll	lm	lm	--	lm	ll	ll	lm	lm	ll	--	lm	--	ll	lm	ll	lm	ll	--	--	ll	ll	--	lm	lm	lm	ll	lm	--	lm	lm	lm	ll	lm	lm	ll	ll	lm	lm	--	--	ll	lm	ll	lm
1794	LG8	M05094	63.852	nn	np	nn	np	np	np	nn	nn	np	np	nn	np	nn	np	nn	np	nn	np	nn	np	nn	nn	nn	nn	np	np	np	nn	nn	np	np	nn	np	nn	np	nn	nn	nn	np	--	np	nn	nn	nn	nn	nn
1795	LG8	M62048	64.543	hk	hk	hk	hh	hk	hh	kk	--	hh	hh	kk	hk	hk	--	kk	hk	kk	--	kk	hk	hk	kk	hk	hk	hh	hk	hk	kk	hk	hk	hh	hk	hh	hk	hh	hk	h-	kk	hh	hh	hk	hk	kk	hk	kk	hk
1796	LG8	M63222	64.726	nn	np	nn	nn	np	np	nn	nn	np	np	nn	np	nn	np	nn	np	nn	nn	nn	np	nn	nn	nn	nn	np	np	np	nn	nn	np	np	nn	np	nn	np	nn	nn	nn	np	np	np	nn	nn	nn	nn	nn
1797	LG8	M72242	64.915	lm	ll	lm	lm	ll	lm	ll	ll	lm	lm	ll	ll	lm	lm	ll	ll	ll	--	ll	ll	lm	ll	lm	lm	lm	ll	ll	ll	lm	--	--	lm	lm	lm	lm	lm	lm	ll	lm	lm	ll	lm	ll	lm	ll	lm
1798	LG8	M53576	65.137	hk	hk	hk	kk	hk	kk	hh	hh	kk	kk	hh	hk	hk	hk	hh	hk	hh	hh	hh	hk	hk	hh	hk	hk	kk	hk	hk	hh	hk	hk	kk	hk	kk	hk	kk	hk	hk	hh	kk	kk	hk	hk	hh	hk	hh	hk
1799	LG8	M50527	65.34	nn	np	--	nn	--	nn	np	--	nn	nn	np	--	np	--	np	--	np	np	np	np	--	np	np	nn	nn	np	--	np	nn	nn	nn	--	nn	--	nn	nn	np	np	nn	nn	nn	nn	np	--	np	--
1800	LG8	M69012	65.397	hk	hk	hk	hh	hk	hh	kk	kk	hh	hh	kk	hk	hk	hk	kk	hk	kk	--	kk	hk	hk	kk	hk	hk	hh	hk	hk	kk	hk	hk	hh	hk	hh	hk	hh	hk	hk	kk	hh	hh	hk	hk	kk	hk	kk	hk
1801	LG8	M00676	65.456	hk	hk	hk	hh	hk	hh	kk	kk	hh	hh	kk	hk	hk	k-	kk	hk	kk	--	kk	hk	hk	kk	hk	hk	hh	hk	hk	kk	hk	hk	hh	hk	hh	hk	hh	hk	hk	kk	hh	hh	hk	hk	kk	hk	kk	hk
1802	LG8	M63223	65.598	hk	hk	hk	hk	hk	hh	kk	kk	hh	hh	kk	hk	hk	hk	kk	hk	kk	kk	kk	hk	hk	kk	hk	hk	hh	hk	hk	kk	hk	hk	hh	hk	hh	hk	hh	hk	hk	kk	hh	hh	hk	hk	kk	hk	kk	hk
1803	LG8	M08498	66.115	lm	ll	lm	--	ll	lm	ll	ll	lm	lm	ll	ll	lm	lm	ll	ll	ll	--	ll	ll	lm	ll	lm	lm	lm	ll	ll	ll	lm	--	--	lm	lm	lm	lm	lm	--	ll	lm	lm	ll	lm	ll	lm	ll	lm
1804	LG8	M70219	66.192	nn	np	nn	nn	np	np	nn	nn	np	np	nn	np	nn	np	nn	np	--	--	nn	np	nn	nn	nn	nn	np	np	np	nn	nn	--	--	--	--	nn	--	nn	nn	nn	np	--	np	nn	nn	nn	nn	nn
1805	LG8	M09222	66.332	hk	hk	hk	kk	hk	kk	hh	hh	kk	kk	hh	hk	hk	hk	hh	hk	hh	k-	hh	hk	hk	hh	hk	hk	kk	hk	hk	hh	hk	hk	kk	hk	kk	hh	kk	hk	hk	hh	kk	kk	hk	hk	h-	hk	hh	hk
1806	LG8	M03992	66.596	hk	hk	hk	kk	hk	kk	hh	hh	kk	kk	hh	hk	hk	hk	hh	hk	hh	k-	hh	hk	hk	hh	hk	hk	kk	hk	hk	hh	hk	hk	kk	hk	kk	hh	kk	hk	hk	hh	kk	kk	hk	hk	--	hk	hh	hk
1807	LG8	M00719	67.077	nn	np	nn	nn	np	np	nn	nn	np	--	nn	np	nn	np	nn	np	nn	--	nn	np	nn	nn	nn	nn	np	np	np	nn	nn	np	np	nn	np	nn	np	nn	nn	nn	np	--	np	nn	nn	nn	nn	nn
1808	LG8	M02511	67.412	nn	np	nn	nn	np	np	nn	nn	np	--	nn	np	nn	np	nn	np	nn	np	nn	np	nn	nn	nn	nn	np	np	np	nn	nn	np	np	nn	np	nn	np	nn	nn	nn	np	np	np	nn	nn	nn	nn	nn
1809	LG8	M69399	67.75	hk	hk	hk	kk	hk	k-	hh	hh	kk	kk	hh	hk	hk	hk	hh	hk	hh	h-	hh	hk	hk	hh	hk	hk	kk	hk	hk	hh	hk	hk	kk	hk	kk	hh	kk	hk	hk	hh	kk	kk	kk	hk	hh	hk	hh	hk
1810	LG8	M69397	67.761	hk	hk	hk	kk	hk	k-	hh	hh	kk	kk	hh	hk	hk	hk	hh	hk	h-	h-	hh	hk	hk	hh	hk	hk	kk	hk	hk	hh	hk	hk	kk	hk	kk	hh	kk	hk	hk	hh	kk	kk	kk	hk	hh	hk	hh	hk
1811	LG8	M03125	68.138	hk	hk	hk	hk	hk	hh	kk	kk	hh	hh	kk	hk	hk	hk	kk	hk	kk	hk	kk	hk	hk	kk	hk	hk	hh	hk	hk	kk	hk	hk	hh	hk	hh	kk	hh	hk	hk	kk	hh	hh	hh	hk	--	--	kk	hk
1812	LG8	M04102	68.14	lm	ll	lm	lm	ll	lm	ll	ll	lm	lm	ll	ll	lm	ll	ll	ll	ll	ll	ll	ll	lm	ll	lm	lm	lm	ll	ll	ll	lm	ll	lm	lm	lm	ll	lm	lm	lm	ll	lm	lm	lm	lm	ll	lm	ll	lm
1813	LG8	M03269	68.426	lm	ll	lm	lm	ll	lm	ll	ll	lm	ll	ll	ll	lm	ll	ll	ll	ll	ll	ll	ll	lm	ll	lm	lm	lm	ll	ll	ll	lm	ll	lm	lm	lm	ll	lm	lm	lm	ll	lm	lm	lm	lm	ll	lm	ll	lm
1814	LG8	M69221	68.456	nn	np	nn	nn	np	nn	nn	nn	np	np	nn	--	nn	--	nn	--	nn	np	nn	np	nn	nn	nn	np	np	--	--	nn	nn	--	np	nn	nn	nn	np	nn	nn	nn	np	--	np	nn	nn	nn	nn	nn
1815	LG8	M64439	68.777	hk	hk	hk	hk	hk	hh	kk	kk	hh	hh	kk	hk	hk	hk	kk	hk	kk	hk	kk	hk	hk	kk	hk	hh	hh	hk	hk	kk	hk	hk	hh	hk	hh	kk	hh	hk	hk	kk	hh	h-	hh	hk	kk	hk	kk	hk
1816	LG8	M11791	68.861	lm	ll	lm	--	ll	--	ll	ll	lm	lm	ll	ll	lm	ll	ll	ll	ll	ll	ll	--	lm	ll	lm	lm	lm	ll	ll	ll	lm	ll	--	lm	lm	ll	lm	lm	--	ll	lm	lm	--	lm	ll	lm	ll	lm
1817	LG8	M00408	68.916	lm	ll	lm	--	ll	--	--	ll	lm	lm	ll	ll	lm	ll	ll	ll	ll	ll	ll	--	lm	ll	lm	lm	lm	ll	ll	ll	lm	ll	--	lm	lm	ll	lm	lm	--	ll	lm	lm	--	lm	ll	lm	ll	lm
1818	LG8	M10144	69.167	nn	np	nn	nn	np	np	nn	nn	np	np	nn	np	nn	nn	nn	np	nn	np	nn	np	nn	nn	nn	np	np	np	np	nn	nn	--	np	nn	np	nn	np	nn	nn	nn	np	np	np	nn	nn	nn	nn	nn
1819	LG8	M64440	69.54	hk	hk	hk	hk	hk	hh	kk	kk	hh	hh	kk	hk	hk	hk	kk	hk	kk	hk	kk	hk	hk	kk	hk	hh	hh	hk	hk	kk	hk	hk	hh	hk	hh	kk	hh	hk	hk	kk	hh	h-	hh	hk	kk	hk	kk	hk
1820	LG8	M10009	70.014	lm	ll	lm	lm	ll	lm	ll	ll	lm	lm	ll	ll	lm	ll	ll	ll	ll	ll	ll	ll	lm	ll	lm	lm	lm	ll	ll	ll	lm	ll	lm	lm	lm	ll	lm	lm	ll	ll	lm	lm	lm	lm	ll	--	ll	lm
1821	LG8	M10361	70.125	nn	np	--	--	np	nn	np	np	nn	nn	np	np	--	--	np	--	--	--	np	--	np	np	np	nn	nn	--	--	np	np	--	nn	np	nn	np	nn	nn	nn	np	nn	nn	nn	--	np	--	np	--
1822	LG8	M12666	70.56	lm	ll	lm	--	ll	lm	ll	ll	lm	lm	ll	ll	lm	ll	ll	ll	ll	ll	ll	ll	lm	ll	lm	lm	lm	ll	ll	ll	lm	ll	ll	lm	lm	ll	lm	lm	lm	ll	lm	lm	lm	lm	lm	lm	ll	lm
1823	LG8	M04885	70.933	nn	np	nn	np	np	nn	nn	nn	np	np	nn	np	np	--	nn	--	nn	--	nn	np	nn	nn	nn	np	np	np	np	nn	nn	np	--	nn	--	nn	np	nn	--	nn	np	np	np	nn	nn	nn	nn	nn
1824	LG8	M54051	71.167	hk	hk	hk	kk	hk	kk	hh	hh	kk	kk	hh	hk	hk	hk	hh	hk	hh	hk	hh	hk	hk	hh	hh	kk	kk	hk	hk	hh	hk	hk	kk	hk	kk	hh	kk	hk	hk	hh	kk	kk	kk	hk	hk	hk	hh	hk
1825	LG8	cms13261	71.472	nn	np	np	--	np	--	nn	nn	np	np	nn	np	np	np	nn	np	nn	np	nn	np	nn	nn	nn	np	np	np	np	nn	nn	np	np	nn	np	nn	np	nn	nn	nn	np	nn	np	nn	nn	nn	nn	nn
1826	LG8	M63196	72.034	hk	hk	hk	kk	hk	hk	hh	hh	kk	kk	hh	hk	kk	hk	hh	hk	hh	hk	hh	hk	hk	hh	hh	kk	kk	hk	hk	hk	hk	hk	kk	hk	kk	hh	kk	hk	hk	hh	kk	kk	kk	hk	hk	hk	hh	hk
1827	LG8	M04071	72.392	lm	ll	lm	lm	ll	lm	ll	ll	lm	lm	ll	ll	lm	ll	ll	ll	ll	ll	ll	ll	lm	ll	ll	lm	lm	ll	ll	ll	lm	ll	lm	lm	lm	ll	lm	lm	lm	ll	--	lm	lm	lm	lm	lm	ll	lm
1828	LG8	M10967	72.526	lm	ll	lm	lm	ll	lm	ll	ll	lm	lm	ll	ll	lm	ll	ll	ll	ll	ll	ll	ll	lm	ll	ll	lm	lm	ll	ll	ll	lm	ll	lm	lm	lm	ll	lm	lm	lm	ll	--	lm	lm	lm	lm	lm	ll	lm
1829	LG8	M66506	72.7	nn	np	nn	nn	np	nn	nn	nn	np	np	nn	np	np	np	nn	np	nn	--	nn	np	nn	nn	nn	np	np	np	np	nn	nn	np	np	nn	np	nn	--	nn	nn	nn	np	np	np	nn	nn	nn	nn	nn
1830	LG8	M06372	73.117	hk	hk	hk	hh	hk	hk	kk	kk	hh	--	kk	hk	hh	hk	kk	hk	kk	--	kk	hk	hk	kk	kk	hh	hh	hk	hk	hk	hk	hk	hh	hk	hh	kk	hh	hk	hk	kk	hh	hh	hh	hk	hk	h-	kk	hk
1831	LG8	M07100	73.128	hk	hk	hk	hh	hk	hk	kk	kk	hh	--	kk	hk	hh	hk	kk	hk	kk	--	kk	hk	hk	kk	kk	hh	hh	hk	hk	hk	hk	hk	hh	hk	hh	kk	hh	hk	hk	kk	hh	hh	hh	hk	hk	hk	kk	hk
1832	LG8	M06519	73.225	hk	hk	hk	hh	hk	hk	kk	kk	hh	--	kk	hk	hh	hk	kk	hk	kk	--	kk	hk	hk	kk	kk	hh	hh	hk	hk	hk	hk	hk	hh	hk	hh	kk	hh	hk	hk	kk	hh	hh	hh	hk	hk	hk	kk	hk
1833	LG8	M06494	73.226	hk	hk	hk	hh	hk	hk	kk	kk	hh	--	kk	hk	hh	hk	kk	hk	kk	--	kk	hk	hk	kk	kk	hh	hh	hk	hk	hk	hk	hk	hh	hk	hh	kk	hh	hk	hk	kk	hh	hh	hh	hk	hk	hk	kk	hk
1834	LG8	M08755	73.461	lm	ll	lm	lm	ll	lm	ll	ll	lm	lm	ll	ll	lm	ll	ll	ll	ll	ll	ll	ll	lm	ll	ll	lm	lm	ll	ll	ll	lm	ll	lm	lm	lm	ll	lm	lm	lm	ll	--	lm	lm	lm	lm	lm	ll	lm
1835	LG8	M03755	73.622	hk	hk	hk	kk	hk	hk	hh	hh	kk	--	hh	hk	kk	hk	hh	hk	hh	--	hh	hk	hk	hh	hh	kk	kk	hk	hk	hk	hk	hk	kk	hk	kk	hh	kk	hk	hk	hh	kk	kk	kk	hk	hk	hk	hh	hk
1836	LG8	M70194	73.629	lm	ll	lm	--	ll	lm	ll	ll	lm	--	ll	ll	lm	ll	ll	ll	ll	--	ll	ll	lm	ll	ll	lm	lm	ll	ll	ll	lm	ll	--	lm	lm	ll	lm	lm	--	ll	lm	lm	lm	lm	lm	lm	ll	lm
1837	LG8	M03495	73.715	hk	hk	hk	kk	hk	hk	hh	hh	kk	--	hh	hk	kk	hk	hh	hk	hh	--	hh	hk	hk	hh	hh	kk	kk	hk	hk	hk	hk	hk	kk	hk	kk	hh	kk	hk	hk	hh	kk	kk	kk	hk	hk	hk	hh	hk
1838	LG8	M01476	74.765	nn	np	nn	nn	np	nn	nn	nn	np	np	nn	np	np	np	nn	np	nn	np	nn	np	nn	nn	nn	np	np	np	np	nn	nn	np	np	nn	np	np	np	nn	nn	nn	np	np	np	nn	np	nn	nn	nn
1839	LG8	M06179	74.779	lm	ll	lm	lm	--	ll	lm	lm	ll	ll	lm	--	lm	ll	lm	lm	lm	ll	lm	lm	lm	lm	lm	ll	ll	--	--	lm	--	lm	ll	--	ll	lm	ll	lm	lm	lm	ll	ll	ll	lm	ll	lm	lm	lm
1840	LG8	M01334	74.988	nn	np	nn	nn	np	nn	nn	nn	np	np	nn	np	np	np	nn	np	nn	np	nn	np	nn	nn	nn	np	np	np	np	nn	nn	np	np	nn	np	np	np	nn	nn	nn	np	np	np	nn	nn	nn	nn	nn
1841	LG8	M63195	75.173	lm	ll	lm	lm	ll	lm	ll	ll	lm	lm	ll	ll	lm	ll	ll	ll	ll	ll	ll	ll	lm	ll	ll	lm	lm	ll	ll	lm	lm	ll	lm	lm	lm	ll	lm	lm	lm	ll	lm	lm	lm	lm	lm	lm	ll	lm
1842	LG8	M07995	75.325	nn	np	nn	nn	np	nn	nn	nn	np	np	nn	np	np	np	nn	np	nn	np	nn	np	nn	nn	nn	np	np	np	np	nn	nn	np	nn	nn	np	np	np	nn	nn	nn	np	np	np	nn	nn	nn	nn	nn
1843	LG8	M03377	75.563	nn	np	nn	nn	np	nn	nn	nn	np	np	nn	np	np	np	nn	np	nn	np	nn	np	nn	nn	nn	np	np	np	np	nn	nn	np	--	nn	np	np	np	nn	nn	nn	np	--	np	nn	nn	nn	nn	nn
1844	LG8	M00319	75.903	nn	np	nn	nn	np	nn	nn	nn	np	np	nn	np	np	np	nn	np	--	np	nn	np	nn	nn	nn	np	np	np	np	nn	nn	np	np	nn	np	np	np	nn	nn	nn	np	np	np	nn	nn	nn	nn	nn
1845	LG8	M06945	76.019	nn	np	nn	np	np	nn	nn	nn	np	np	nn	np	np	np	nn	np	--	np	nn	np	nn	nn	nn	np	np	np	np	nn	nn	np	np	nn	np	np	np	nn	nn	nn	np	np	np	nn	nn	nn	nn	nn
1846	LG8	M04504	76.087	lm	ll	lm	lm	ll	lm	ll	ll	lm	lm	ll	ll	lm	ll	ll	ll	ll	--	ll	ll	lm	ll	ll	lm	lm	ll	ll	lm	lm	ll	lm	lm	lm	ll	lm	lm	--	ll	lm	--	lm	lm	lm	lm	ll	lm
1847	LG8	M00554	76.22	lm	ll	lm	lm	ll	lm	ll	ll	lm	lm	ll	ll	lm	ll	ll	ll	ll	--	ll	ll	lm	ll	ll	lm	lm	ll	ll	lm	lm	ll	lm	lm	lm	ll	lm	lm	--	ll	lm	--	lm	lm	lm	lm	ll	lm
1848	LG8	M07261	76.553	nn	np	nn	nn	np	nn	nn	nn	np	np	nn	np	np	nn	nn	np	--	np	nn	np	nn	nn	nn	--	--	np	np	nn	nn	np	np	nn	np	np	np	nn	nn	nn	np	np	np	nn	nn	--	nn	nn
1849	LG8	M68498	76.851	hk	hk	hk	hh	hk	hh	kk	kk	hh	--	kk	hk	hk	--	kk	hk	kk	--	kk	hk	hk	kk	kk	hh	hh	hk	hk	kk	hk	hk	--	hk	hh	kk	hh	hk	hk	kk	hh	hh	hh	hk	k-	hk	kk	hk
1850	LG8	M03695	77.385	lm	ll	lm	lm	ll	--	ll	ll	lm	--	ll	ll	lm	ll	ll	ll	ll	ll	ll	ll	lm	ll	ll	lm	--	ll	ll	lm	--	ll	ll	lm	lm	ll	lm	lm	lm	ll	lm	--	lm	lm	lm	lm	ll	lm
1851	LG8	M53779	77.45	nn	np	nn	nn	np	nn	nn	nn	np	np	nn	np	np	np	nn	np	nn	np	nn	np	nn	nn	nn	np	np	np	np	nn	nn	np	np	nn	nn	np	--	nn	nn	nn	np	np	np	nn	nn	nn	np	nn
1852	LG8	M02718	77.816	lm	ll	lm	lm	ll	lm	ll	ll	lm	--	ll	ll	lm	ll	ll	ll	ll	--	ll	ll	lm	ll	ll	lm	lm	ll	ll	lm	lm	ll	lm	lm	lm	ll	lm	lm	lm	ll	lm	--	lm	lm	lm	lm	ll	lm
1853	LG8	M58340	78.399	hk	hk	--	hk	hk	--	--	k-	hh	hh	kk	hk	hh	hk	kk	hk	kk	hk	kk	hh	hk	kk	kk	hh	hh	hk	hk	hk	hk	--	--	hk	hh	hk	hh	k-	kk	kk	hh	--	--	hk	hk	hk	kk	hk
1854	LG8	M02935	78.789	nn	np	nn	np	--	--	np	np	nn	nn	np	np	nn	nn	np	nn	np	--	np	nn	nn	np	np	nn	nn	np	nn	np	np	nn	--	np	nn	np	nn	--	np	np	nn	nn	nn	--	np	--	np	np
1855	LG8	M55485	78.823	lm	ll	lm	ll	lm	lm	lm	ll	--	lm	ll	lm	ll	lm	ll	lm	ll	--	ll	lm	lm	ll	--	ll	lm	lm	ll	ll	--	lm	--	ll	lm	--	lm	lm	--	ll	--	lm	lm	--	ll	--	ll	--
1856	LG8	M68659	79.179	lm	ll	lm	--	ll	ll	ll	ll	lm	--	ll	ll	lm	ll	ll	ll	ll	--	ll	ll	--	ll	ll	--	lm	ll	ll	lm	lm	ll	--	lm	lm	ll	lm	lm	--	ll	lm	lm	lm	--	--	lm	ll	lm
1857	LG8	M68657	79.268	lm	ll	lm	lm	ll	ll	ll	ll	lm	--	ll	ll	lm	ll	ll	ll	ll	--	ll	ll	--	ll	ll	--	lm	ll	ll	lm	lm	ll	--	lm	lm	ll	lm	lm	--	ll	lm	lm	lm	--	--	lm	ll	lm
1858	LG8	M00446	79.606	nn	np	nn	np	np	nn	nn	nn	np	np	nn	np	np	np	nn	np	nn	np	nn	np	nn	nn	nn	np	np	np	np	nn	nn	np	np	nn	np	np	np	nn	nn	nn	np	np	np	nn	nn	nn	np	nn
1859	LG8	M03066	79.821	hk	hk	hk	hh	hk	hk	kk	kk	hh	hh	kk	hk	hh	hk	kk	hk	kk	hk	kk	hh	hk	kk	kk	hh	hh	hk	hk	hk	hk	hk	hh	h-	hh	hk	hh	hk	kk	kk	hh	hh	hh	hk	hk	hk	hk	hk
1860	LG8	M12528	80.445	lm	ll	lm	--	ll	lm	ll	ll	lm	--	ll	ll	lm	ll	ll	ll	ll	--	ll	lm	lm	ll	ll	lm	lm	ll	ll	lm	lm	ll	lm	lm	--	ll	lm	lm	ll	ll	lm	lm	lm	lm	lm	lm	ll	lm
1861	LG8	M72515	80.543	nn	np	nn	nn	np	nn	--	--	np	--	nn	--	--	--	nn	--	nn	--	nn	np	nn	nn	nn	np	np	np	nn	nn	nn	--	np	nn	np	nn	nn	nn	--	nn	np	--	np	nn	--	nn	--	nn
1862	LG8	M65361	81.262	lm	ll	lm	lm	ll	lm	ll	ll	--	lm	ll	--	lm	ll	ll	ll	ll	ll	--	ll	lm	ll	ll	lm	lm	ll	ll	lm	ll	ll	lm	lm	lm	--	--	lm	lm	ll	lm	ll	lm	lm	lm	lm	--	lm
1863	LG8	M09087	82.381	lm	ll	lm	lm	ll	--	ll	ll	lm	--	ll	ll	lm	ll	ll	ll	ll	ll	ll	ll	lm	ll	ll	lm	--	ll	ll	lm	--	ll	ll	lm	lm	ll	lm	lm	lm	ll	ll	--	lm	lm	lm	ll	ll	lm
1864	LG8	M50332	83.101	nn	np	nn	nn	np	--	nn	nn	np	--	nn	--	--	--	nn	np	--	--	nn	np	nn	nn	nn	np	np	np	np	nn	nn	--	--	nn	--	np	np	nn	nn	nn	np	nn	np	nn	nn	nn	np	nn
1865	LG8	M50331	83.273	nn	np	nn	--	np	--	nn	nn	np	--	nn	--	--	--	nn	np	--	--	nn	np	nn	nn	nn	np	np	np	np	nn	nn	--	--	nn	--	np	np	nn	nn	nn	np	nn	np	nn	nn	nn	np	nn
1866	LG8	M11139	84.952	nn	np	--	--	np	--	nn	nn	np	np	nn	--	np	--	nn	--	nn	nn	nn	np	--	nn	nn	np	np	--	np	nn	nn	nn	np	np	np	--	np	np	nn	nn	np	np	np	--	--	--	--	np
1867	LG8	M09957	85.809	nn	np	nn	np	np	nn	nn	nn	np	np	nn	np	np	np	nn	np	--	np	nn	np	nn	nn	nn	np	np	np	--	nn	nn	--	np	nn	--	np	np	nn	nn	nn	np	--	np	nn	nn	nn	np	nn
1868	LG8	M69561	86.508	nn	np	nn	np	np	nn	nn	nn	np	np	nn	np	np	np	nn	np	np	--	nn	np	np	nn	nn	np	np	np	np	nn	nn	np	np	nn	np	np	np	nn	nn	nn	np	--	np	nn	nn	nn	np	nn
1869	LG8	M01351	86.61	nn	np	nn	np	np	nn	nn	nn	np	np	nn	np	np	np	nn	np	np	np	nn	--	np	nn	nn	np	np	np	np	nn	nn	np	np	nn	np	np	np	nn	nn	nn	np	np	np	nn	nn	nn	nn	nn
1870	LG8	M03592	87.885	nn	np	nn	nn	np	nn	nn	nn	np	--	nn	np	np	np	nn	np	np	np	nn	--	np	nn	nn	np	np	np	np	nn	nn	nn	np	nn	np	np	--	nn	nn	nn	np	np	np	nn	nn	nn	np	nn
1871	LG8	M11630	88.026	lm	ll	lm	lm	ll	--	ll	--	lm	--	ll	ll	lm	ll	ll	ll	--	--	ll	lm	--	--	ll	lm	lm	ll	ll	lm	lm	ll	--	--	ll	ll	lm	lm	--	ll	lm	lm	--	lm	--	lm	ll	lm
1872	LG8	M08593	89.047	nn	np	nn	--	np	nn	nn	nn	np	np	nn	np	np	np	nn	np	np	np	nn	np	--	nn	nn	np	np	np	np	nn	nn	np	np	nn	np	np	np	nn	nn	nn	np	--	np	nn	nn	nn	np	nn
1873	LG8	M12687	89.466	nn	np	nn	nn	np	nn	nn	nn	np	np	nn	np	np	np	nn	np	np	np	nn	np	np	nn	nn	np	np	np	np	nn	nn	np	np	nn	np	np	np	nn	nn	nn	np	np	np	nn	nn	nn	nn	nn
1874	LG8	M07174	90.374	nn	np	nn	nn	np	nn	nn	nn	np	np	nn	np	np	np	nn	np	np	--	nn	np	np	nn	nn	np	np	np	np	nn	nn	np	np	nn	np	np	np	nn	--	nn	np	--	--	nn	nn	nn	np	nn
1875	LG8	M08876	90.398	nn	np	nn	nn	np	nn	nn	nn	np	np	nn	np	np	np	nn	np	np	--	nn	np	np	nn	nn	np	np	np	np	nn	nn	np	np	nn	np	np	np	nn	--	nn	np	--	np	nn	nn	nn	np	nn
1876	LG8	M09382	91.031	nn	np	nn	np	np	--	--	--	np	np	nn	--	nn	np	nn	np	np	--	nn	np	nn	nn	nn	np	np	np	np	nn	nn	--	--	nn	np	np	np	nn	--	nn	np	--	--	nn	nn	--	np	nn
1877	LG8	M62230	91.983	nn	np	nn	np	np	nn	nn	nn	np	np	nn	np	np	np	nn	--	np	--	nn	np	np	nn	nn	np	np	np	np	nn	nn	nn	--	nn	np	np	np	nn	nn	nn	np	np	np	nn	nn	nn	np	nn
1878	LG8	M69568	92.879	hk	hk	hk	hk	hk	hh	kk	kk	hh	hh	kk	hk	hh	--	kk	hk	hk	hk	hk	hh	hh	kk	kk	hk	hh	hk	kk	hk	hh	kk	hh	hk	hh	hk	hh	hk	kk	kk	hh	hh	hh	hh	hk	hk	hk	hk
1879	LG8	M70996	93.267	hk	hk	hk	hk	hk	hh	kk	kk	hh	hh	kk	hk	hh	kk	kk	hk	hk	hk	hk	hh	hh	kk	kk	hk	hh	hk	kk	hk	hh	kk	hh	hk	hh	hk	hh	hk	kk	kk	hh	hh	hh	hh	hk	hk	hk	hk
1880	LG8	M70997	93.399	hk	hk	hk	hk	hk	kk	hh	hh	kk	kk	hh	hk	kk	hh	hh	hk	hk	hk	hk	kk	kk	hh	hh	hk	kk	hk	hh	hk	kk	hh	kk	hk	kk	hk	kk	hk	hh	hh	kk	kk	kk	kk	hk	hk	hk	hk
1881	LG8	M02073	93.955	nn	np	nn	nn	np	nn	nn	nn	np	--	nn	np	np	np	nn	np	--	--	nn	np	np	nn	nn	np	np	np	np	nn	nn	nn	--	nn	np	np	np	nn	nn	nn	np	--	np	nn	nn	nn	np	nn
1882	LG8	M04747	94.393	lm	ll	lm	ll	lm	ll	lm	--	ll	ll	lm	lm	ll	--	lm	ll	lm	lm	--	ll	ll	lm	lm	ll	ll	lm	lm	lm	lm	lm	ll	lm	ll	lm	ll	lm	lm	--	ll	ll	ll	lm	ll	lm	lm	lm
1883	LG8	M04989	94.821	nn	np	nn	np	np	nn	nn	nn	np	--	nn	nn	np	np	nn	np	np	np	nn	np	np	nn	nn	np	np	np	np	nn	nn	nn	np	nn	np	np	np	nn	nn	nn	np	nn	np	nn	nn	nn	np	nn
1884	LG8	M02005	95.979	hk	hk	hk	hk	hk	hh	kk	kk	hh	hh	kk	hk	hh	kk	kk	hk	hk	kk	hk	hh	hh	kk	kk	hk	hh	hk	kk	hk	hh	kk	hh	hk	hh	hk	hh	hk	--	kk	hh	hh	hk	hh	hk	hk	hk	hk
1885	LG8	M03480	96.708	nn	np	nn	nn	--	nn	nn	nn	np	--	nn	np	np	--	nn	np	--	np	nn	np	np	nn	nn	np	np	--	--	nn	nn	nn	np	nn	np	--	--	nn	nn	nn	np	--	np	nn	nn	nn	np	nn
1886	LG8	M00646	97.356	hk	hk	hk	hk	hk	kk	hh	hh	kk	kk	hh	hk	kk	hh	hh	hk	hk	hh	hk	kk	kk	hh	hh	hk	kk	hk	hh	hk	kk	hh	kk	hk	kk	hk	kk	hk	--	hh	kk	kk	hk	kk	hk	hk	hk	hk
1887	LG8	M55198	98.338	hk	hk	hk	hk	hk	hk	kk	kk	hh	hh	kk	hk	hh	kk	kk	kk	hk	--	hk	hh	hh	kk	kk	hk	hh	kk	kk	hk	hh	kk	hh	hh	hk	k-	hh	hk	kk	kk	hh	hh	hk	hh	hk	hk	hk	hk
1888	LG8	M55203	99.134	hk	hk	hk	hh	hk	hk	kk	kk	hh	hh	kk	hk	hh	kk	kk	kk	hk	--	hk	hh	hh	kk	k-	hk	hh	kk	kk	hk	hh	kk	hh	hh	hk	k-	hh	hk	kk	kk	hh	hh	hk	hh	hk	hk	hk	hk
1889	LG8	M11946	100.159	lm	ll	lm	ll	lm	ll	lm	lm	ll	ll	lm	--	ll	lm	lm	--	ll	lm	lm	ll	ll	ll	lm	--	ll	--	lm	lm	ll	--	ll	lm	ll	ll	ll	lm	lm	lm	ll	ll	ll	ll	lm	lm	ll	--
1890	LG8	M71728	100.821	hk	hk	hk	hh	hk	hk	kk	kk	hh	--	kk	hk	hh	kk	kk	hk	hk	--	hk	hh	hh	kk	kk	hk	hh	hk	kk	hk	hh	--	--	hk	hk	hk	hh	hk	kk	kk	hh	--	hk	hh	hk	hk	hh	hk
1891	LG8	M06268	101.737	nn	np	nn	nn	np	nn	nn	--	np	--	nn	np	np	--	nn	np	--	--	nn	np	np	nn	nn	np	np	np	np	nn	nn	--	np	nn	np	np	np	nn	nn	nn	np	np	np	nn	nn	nn	--	nn
1892	LG8	M11626	103.063	nn	np	nn	nn	np	nn	nn	--	np	--	nn	np	np	--	nn	np	--	--	nn	np	np	nn	nn	np	np	np	np	nn	nn	--	np	nn	np	np	np	nn	nn	nn	np	np	np	nn	np	nn	--	nn
1893	LG8	M11247	103.619	lm	ll	lm	lm	lm	--	ll	ll	lm	ll	ll	--	lm	ll	ll	ll	lm	ll	--	lm	lm	ll	ll	ll	lm	ll	ll	lm	--	ll	lm	lm	lm	lm	lm	ll	ll	--	lm	--	lm	lm	lm	lm	ll	lm
1894	LG8	M04752	104.306	hk	hk	hk	kk	hk	hk	hh	hh	kk	--	hh	hk	hk	hh	hh	hh	hk	hk	hk	kk	kk	hh	hh	hk	kk	hh	hh	hk	kk	hh	kk	kk	hh	hk	kk	hk	hh	hk	kk	hk	hk	kk	hk	hk	hk	hk
1895	LG8	M11755	105.418	nn	np	nn	nn	np	nn	nn	--	np	--	nn	np	np	--	nn	np	--	--	nn	np	np	nn	nn	np	np	np	np	nn	nn	--	np	nn	np	np	np	nn	nn	nn	np	np	np	nn	np	nn	--	nn
1896	LG8	M10202	108.526	hk	hk	h-	h-	h-	h-	h-	h-	kk	h-	h-	h-	h-	h-	h-	h-	--	--	h-	kk	h-	h-	h-	h-	kk	h-	h-	h-	kk	h-	h-	kk	h-	h-	kk	kk	--	h-	kk	h-	h-	kk	h-	h-	h-	h-
1897	LG8	M70035	109.26	hk	hk	hk	kk	hk	hk	hh	hh	kk	hk	hh	hk	hk	hh	hh	hh	hk	hk	hk	kk	hk	hk	hh	hk	kk	hh	hh	hk	kk	hh	--	kk	hk	hk	kk	kk	hh	hk	kk	hk	hh	kk	hk	hk	hk	hk
1898	LG8	M03430	110.036	hk	hk	hk	hh	hk	hk	kk	hk	hh	hk	kk	hk	hk	kk	kk	kk	hk	hh	hk	hh	hk	hk	kk	hk	hh	kk	kk	hk	hh	kk	hh	hh	hh	hk	hh	hh	hk	hk	hh	hk	kk	hh	hk	hk	hk	hk
1899	LG8	M53982	111.045	hk	hk	hk	hh	hk	hk	kk	hk	hh	hk	kk	hk	hk	kk	kk	kk	--	--	hk	hh	hk	hk	kk	hk	hh	kk	kk	hk	hh	kk	hk	hh	hk	hk	hh	hh	hk	hk	hh	hk	kk	hh	k-	hk	hk	hk
1900	LG8	M70494	112.052	hk	hk	hk	kk	hk	hk	hh	hk	kk	hk	hh	hk	hk	h-	hh	hh	hk	hk	hk	kk	hk	hk	hh	hk	kk	hh	hh	hk	kk	hh	hk	kk	hk	hk	kk	kk	hk	hk	kk	hk	hh	kk	hk	hk	hk	hk
1901	LG8	M70495	112.09	hk	hk	hk	hh	hk	hk	kk	hk	hh	hk	kk	hk	hk	k-	kk	kk	hk	hk	hk	hh	hk	hk	kk	hk	hh	kk	kk	hk	hh	kk	hk	hh	hk	hk	hh	hh	hk	hk	hh	hk	kk	hh	hk	hk	hk	hk
1902	LG8	M05931	113.56	hk	hk	hk	hk	hk	kk	hh	hk	kk	hk	hk	k-	hk	--	hh	hh	hh	k-	hk	kk	hk	hk	hh	hk	kk	hh	hh	hk	kk	hh	--	kk	--	hk	kk	kk	hk	hk	hk	kk	hh	kk	hk	hk	hk	hk
1903	LG8	M12691	114.165	lm	ll	ll	ll	lm	ll	lm	--	lm	lm	lm	lm	--	lm	lm	lm	lm	ll	lm	ll	--	--	lm	lm	ll	lm	lm	--	ll	lm	lm	ll	lm	lm	ll	ll	--	lm	ll	lm	lm	ll	--	ll	lm	lm
1904	LG8	M00066	114.381	hk	hk	h-	h-	h-	h-	kk	kk	h-	h-	h-	h-	h-	--	kk	kk	h-	h-	h-	h-	h-	h-	kk	h-	h-	kk	h-	h-	h-	--	--	h-	h-	h-	h-	h-	h-	h-	h-	h-	kk	h-	h-	h-	h-	h-
1905	LG8	M00848	115.278	hk	hk	hh	hh	hk	hk	kk	hk	hk	hk	hk	hk	hk	kk	kk	kk	hk	hk	hk	hh	hk	hk	kk	hk	hh	kk	kk	hk	hh	kk	hk	hh	hk	hk	hh	hh	hk	hk	hh	kk	k-	hh	hk	hk	hk	hk
1906	LG8	M70012	116.471	hk	hk	hh	hk	hk	hk	kk	hk	hk	hk	hk	hk	hk	kk	kk	kk	hk	--	hk	hh	hk	hk	kk	hk	hh	kk	kk	hk	hh	kk	--	hh	hk	hk	hh	hh	kk	hk	hh	kk	kk	hh	hk	hk	hk	hk
1907	LG8	M00172	116.991	hk	hk	kk	hk	hk	hk	hh	hk	hk	hk	hk	hk	hk	hh	hh	hh	hk	hk	hk	kk	hk	hk	hh	hk	kk	hh	hh	hk	kk	hh	hk	kk	hk	hk	kk	kk	hk	hk	kk	hh	hh	kk	hk	k-	hk	hk
1908	LG8	M63026	117.709	hk	hk	kk	kk	hk	hk	hh	kk	hk	hk	hk	hk	hk	hh	hh	hh	hk	--	hk	kk	hk	hk	hh	hk	kk	hh	hh	hk	kk	h-	hk	kk	hk	hk	kk	kk	hk	hk	kk	hh	hh	kk	hk	hk	hk	hk
1909	LG8	M01225	118.385	lm	ll	ll	lm	lm	lm	lm	--	lm	lm	lm	lm	lm	lm	lm	lm	lm	lm	lm	ll	--	lm	lm	lm	ll	lm	lm	lm	ll	lm	lm	ll	lm	--	ll	ll	lm	lm	ll	lm	lm	ll	--	ll	lm	lm
1910	LG8	M01519	118.541	lm	ll	ll	lm	lm	lm	lm	--	lm	lm	lm	lm	lm	lm	lm	lm	lm	lm	lm	ll	ll	lm	lm	lm	ll	lm	lm	lm	ll	lm	lm	ll	lm	--	ll	ll	lm	lm	ll	lm	lm	ll	--	ll	lm	lm
1911	LG8	M00857	118.745	lm	ll	lm	lm	--	lm	ll	lm	lm	lm	lm	lm	--	ll	ll	ll	lm	lm	lm	lm	lm	lm	ll	ll	lm	ll	ll	--	lm	ll	lm	lm	lm	lm	lm	lm	lm	lm	lm	ll	ll	lm	lm	lm	--	--
1912	LG8	M55565	119.284	hk	hk	kk	hk	hk	hk	hk	hk	hk	k-	hk	k-	hk	hk	hh	hh	hk	h-	hk	kk	hk	hk	hh	hk	kk	hk	hk	hk	kk	hk	kk	kk	hk	hk	kk	kk	hk	hk	kk	hh	hh	kk	hk	hk	hk	hk
1913	LG8	M07410	120.829	lm	ll	lm	lm	lm	lm	ll	lm	lm	--	lm	lm	lm	ll	ll	ll	lm	lm	lm	lm	lm	lm	ll	lm	lm	ll	ll	lm	lm	ll	lm	lm	lm	lm	lm	lm	lm	--	lm	ll	ll	lm	--	lm	lm	lm
1914	LG8	M06876	121.472	hk	hk	kk	kk	hk	hk	hh	hk	hk	hk	hk	hk	h-	hh	hh	hh	--	hk	hk	kk	hk	hk	hk	hk	kk	hh	hh	hk	kk	--	--	kk	--	hk	kk	kk	--	hk	kk	hh	hh	kk	hk	hk	k-	hk
1915	LG8	M71147	123.13	hk	hk	kk	kk	hk	hk	hh	hk	hk	--	hk	h-	hk	hh	hh	hh	hk	--	hk	kk	hk	hk	hk	hk	kk	hh	hh	hk	kk	--	--	kk	hk	kk	kk	kk	hk	hk	kk	hh	hh	kk	hk	hk	hk	hk
1916	LG8	M00365	125.147	lm	ll	lm	lm	lm	lm	ll	--	lm	lm	lm	lm	lm	ll	ll	ll	--	lm	lm	lm	lm	--	lm	lm	lm	ll	ll	lm	lm	ll	lm	lm	--	lm	lm	lm	lm	lm	lm	ll	ll	lm	lm	lm	lm	--
1917	LG8	M09096	126.405	lm	ll	lm	lm	ll	lm	ll	lm	lm	lm	lm	lm	lm	ll	lm	ll	lm	lm	lm	lm	lm	lm	--	lm	lm	ll	ll	lm	lm	lm	ll	lm	lm	lm	lm	lm	--	lm	lm	ll	ll	lm	--	lm	lm	--
1918	LG8	M05923	128.08	nn	np	nn	np	np	np	np	np	nn	np	np	nn	np	np	nn	np	nn	nn	nn	np	nn	nn	np	np	nn	np	np	np	nn	np	np	nn	np	nn	nn	nn	np	nn	nn	np	np	nn	--	np	nn	np
1919	LG8	M12127	128.624	hk	hk	kk	hk	hh	hk	hh	hk	hk	--	hk	hk	hk	hh	hk	hh	hk	--	hk	hk	hk	hk	hk	hk	kk	hh	hh	hk	kk	hh	--	kk	hk	hk	kk	kk	--	hk	kk	hh	hh	kk	hk	h-	hk	hk
1920	LG8	M02240	129.435	hk	hk	kk	h-	h-	--	h-	h-	h-	--	h-	h-	h-	h-	h-	h-	--	--	h-	h-	h-	h-	h-	h-	kk	h-	h-	h-	kk	h-	h-	kk	h-	--	kk	kk	h-	h-	kk	h-	h-	kk	h-	h-	--	h-
1921	LG8	M00793	129.897	hk	hk	hh	hk	kk	hk	kk	hk	hk	hk	hk	hk	hk	kk	hk	kk	hk	--	hk	hk	hk	hk	hk	hk	hh	kk	kk	hk	hh	kk	kk	hh	hk	hk	hh	hh	--	hk	hh	kk	kk	hh	hk	hk	hk	hk
1922	LG8	M03966	131.392	lm	ll	ll	ll	lm	ll	lm	ll	lm	ll	ll	lm	ll	lm	lm	lm	lm	ll	--	ll	--	lm	ll	ll	ll	lm	ll	ll	ll	ll	lm	ll	ll	--	ll	ll	ll	lm	ll	lm	lm	ll	ll	ll	lm	ll
1923	LG8	M04300	131.631	nn	np	nn	nn	np	nn	np	nn	nn	--	--	nn	np	np	nn	np	nn	nn	nn	--	nn	nn	np	np	nn	np	np	np	nn	nn	--	nn	np	nn	nn	nn	np	nn	nn	np	--	nn	np	np	nn	np
1924	LG8	M07453	132.239	nn	np	nn	nn	np	np	np	np	nn	np	np	nn	np	--	nn	np	nn	--	nn	np	nn	nn	np	np	nn	np	np	np	nn	--	np	nn	np	nn	nn	nn	--	nn	nn	--	np	nn	np	np	nn	np
1925	LG8	M71730	133.064	nn	np	nn	nn	np	np	np	--	nn	--	np	nn	np	np	nn	np	nn	--	nn	np	nn	nn	np	--	nn	np	np	np	nn	--	np	nn	np	nn	nn	nn	--	nn	nn	np	np	nn	np	np	nn	np
1926	LG8	M53275	133.402	lm	ll	ll	ll	lm	ll	lm	ll	lm	ll	ll	lm	ll	lm	lm	lm	lm	--	lm	ll	lm	lm	ll	ll	ll	lm	lm	ll	ll	ll	lm	ll	ll	lm	ll	ll	ll	lm	ll	lm	lm	ll	ll	ll	lm	ll
1927	LG8	M03859	133.99	nn	np	nn	np	np	np	np	np	nn	np	np	nn	np	np	nn	np	nn	nn	nn	np	nn	nn	np	np	nn	np	np	np	nn	np	np	nn	np	nn	nn	nn	np	nn	nn	np	np	nn	np	np	nn	np
1928	LG8	M10111	134.106	lm	ll	--	lm	lm	ll	lm	ll	lm	ll	ll	lm	ll	lm	lm	lm	lm	lm	lm	ll	lm	lm	ll	ll	ll	lm	lm	ll	ll	lm	lm	ll	--	lm	ll	ll	lm	lm	ll	ll	lm	ll	ll	ll	lm	ll
1929	LG8	M12569	137.927	lm	ll	ll	ll	lm	ll	ll	ll	--	ll	ll	lm	ll	lm	lm	--	--	lm	lm	ll	lm	lm	ll	ll	ll	lm	lm	ll	ll	--	--	ll	ll	lm	ll	ll	ll	lm	ll	lm	lm	ll	ll	ll	lm	ll
1930	LG8	M71135	139.348	lm	ll	ll	ll	lm	ll	lm	ll	lm	ll	ll	lm	ll	--	lm	lm	lm	lm	lm	ll	lm	lm	ll	ll	ll	lm	lm	ll	ll	ll	lm	ll	ll	ll	ll	ll	ll	lm	ll	lm	lm	ll	ll	ll	lm	ll
1931	LG8	M05282	141.71	nn	np	nn	np	np	np	--	nn	nn	--	np	nn	np	--	nn	--	nn	--	nn	np	nn	nn	np	np	nn	np	np	np	nn	np	np	nn	np	nn	np	nn	--	nn	nn	np	np	nn	np	np	--	np
1932	LG8	M07128	141.919	nn	np	nn	np	np	np	--	nn	nn	--	np	nn	np	--	nn	--	nn	--	nn	np	nn	nn	np	np	nn	np	np	np	nn	np	np	nn	np	nn	np	nn	np	nn	nn	np	np	nn	np	--	--	np
1933	LG8	M00440	142.11	nn	np	nn	np	np	np	--	nn	nn	--	np	nn	np	--	nn	--	nn	--	nn	np	nn	nn	np	np	nn	np	np	np	nn	np	np	--	np	nn	np	nn	--	nn	nn	np	np	nn	np	--	--	np
1934	LG8	M02033	143.545	nn	np	np	np	np	np	--	nn	nn	--	np	--	np	--	nn	--	nn	--	nn	np	nn	--	np	np	nn	np	np	np	nn	np	np	nn	np	nn	np	nn	--	nn	nn	np	np	nn	np	np	--	np
1935	LG8	M70901	143.665	lm	ll	ll	ll	ll	ll	lm	ll	lm	lm	ll	lm	ll	lm	lm	lm	lm	--	lm	ll	lm	--	ll	ll	ll	lm	lm	ll	ll	ll	lm	ll	ll	ll	ll	ll	ll	lm	ll	lm	lm	ll	ll	ll	lm	ll
1936	LG8	M06357	144.048	nn	np	np	np	np	np	--	nn	nn	--	np	--	np	--	nn	--	nn	--	nn	np	nn	--	np	np	nn	np	np	np	nn	np	np	nn	np	nn	np	nn	--	nn	nn	np	np	nn	np	--	--	np
1937	LG8	M05588	144.069	nn	np	np	np	np	np	--	nn	nn	--	np	--	np	--	nn	--	nn	--	nn	np	nn	nn	np	np	nn	np	np	np	nn	np	np	nn	np	nn	np	nn	--	nn	nn	np	np	nn	np	--	--	np
1938	LG8	M00668	144.076	lm	ll	ll	ll	lm	ll	lm	ll	lm	ll	ll	lm	ll	lm	lm	ll	lm	--	lm	ll	lm	--	ll	ll	ll	lm	lm	ll	ll	ll	lm	ll	ll	ll	ll	ll	ll	lm	ll	lm	lm	ll	--	ll	lm	ll
1939	LG8	M69881	144.09	lm	ll	--	ll	ll	ll	--	ll	lm	--	ll	--	ll	--	lm	lm	lm	lm	lm	ll	lm	lm	ll	ll	ll	lm	lm	ll	ll	--	lm	ll	ll	ll	ll	ll	ll	lm	ll	lm	lm	ll	ll	ll	lm	ll
1940	LG8	M54452	144.252	lm	ll	ll	lm	lm	ll	lm	ll	lm	ll	ll	lm	ll	lm	lm	lm	--	lm	lm	ll	lm	lm	ll	ll	ll	lm	lm	ll	ll	ll	lm	ll	ll	ll	ll	ll	ll	lm	ll	lm	lm	ll	ll	ll	lm	ll
1941	LG8	M54454	144.699	lm	ll	ll	lm	lm	ll	lm	ll	lm	ll	ll	lm	ll	lm	lm	lm	--	lm	lm	ll	lm	lm	ll	ll	ll	lm	lm	ll	ll	ll	lm	ll	ll	ll	ll	ll	ll	lm	ll	lm	lm	ll	ll	ll	lm	ll
1942	LG8	M00246	144.923	lm	ll	ll	ll	ll	ll	--	ll	lm	--	ll	--	ll	--	lm	--	ll	--	lm	ll	lm	lm	ll	ll	ll	lm	lm	ll	ll	ll	--	ll	ll	ll	ll	ll	ll	lm	ll	lm	lm	ll	ll	ll	ll	ll
1943	LG8	M02256	145.739	lm	ll	ll	lm	ll	ll	lm	ll	lm	lm	ll	lm	ll	ll	lm	lm	lm	lm	lm	ll	lm	lm	ll	ll	ll	lm	lm	ll	ll	ll	lm	ll	ll	ll	ll	ll	ll	lm	ll	lm	lm	ll	ll	ll	lm	ll
1944	LG8	M03729	148.453	lm	ll	lm	ll	lm	lm	ll	lm	ll	--	lm	ll	lm	--	ll	ll	ll	--	ll	ll	ll	ll	lm	lm	lm	ll	ll	lm	lm	lm	ll	lm	lm	lm	lm	lm	--	ll	lm	ll	ll	lm	lm	lm	ll	lm
1945	LG8	M62809	150.156	lm	ll	ll	lm	ll	ll	lm	ll	lm	lm	ll	lm	ll	lm	lm	lm	lm	ll	lm	lm	lm	lm	ll	ll	ll	lm	lm	ll	ll	ll	ll	ll	ll	ll	ll	ll	ll	lm	ll	lm	lm	ll	ll	ll	lm	ll
1946	LG8	M62800	150.275	lm	ll	ll	lm	ll	ll	lm	ll	lm	lm	ll	lm	ll	lm	lm	lm	lm	ll	lm	lm	lm	--	ll	ll	ll	lm	lm	ll	ll	ll	ll	ll	ll	ll	ll	ll	ll	lm	ll	lm	lm	ll	ll	ll	lm	ll
1947	LG8	M62801	150.887	lm	ll	ll	lm	ll	ll	lm	ll	lm	lm	ll	lm	ll	lm	lm	lm	lm	ll	lm	lm	lm	--	ll	ll	ll	lm	lm	ll	ll	ll	ll	ll	ll	ll	ll	ll	ll	lm	ll	lm	lm	ll	ll	ll	lm	ll
1948	LG8	M04667	153.346	lm	ll	lm	ll	lm	lm	ll	lm	ll	--	lm	ll	lm	--	ll	ll	ll	--	ll	ll	ll	ll	lm	lm	lm	ll	ll	lm	lm	--	ll	lm	--	lm	lm	lm	lm	lm	lm	--	ll	lm	lm	lm	ll	lm
1949	LG8	M08303	154.532	lm	ll	lm	ll	lm	lm	ll	lm	ll	--	lm	ll	lm	--	ll	ll	ll	--	ll	ll	ll	ll	lm	lm	lm	ll	ll	lm	lm	--	ll	lm	--	lm	lm	lm	lm	lm	lm	--	ll	lm	lm	lm	ll	lm
1950	LG8	M55067	154.764	nn	np	nn	nn	--	--	--	np	nn	--	--	nn	--	np	nn	--	nn	--	nn	nn	nn	nn	nn	--	nn	np	nn	np	nn	--	nn	nn	--	nn	nn	nn	np	nn	nn	np	--	nn	np	nn	nn	nn
1951	LG8	M63667	158.643	lm	ll	ll	lm	lm	ll	--	ll	lm	--	ll	lm	ll	lm	lm	lm	ll	--	lm	ll	ll	lm	ll	ll	ll	--	--	ll	ll	ll	lm	ll	ll	--	ll	ll	ll	--	ll	lm	lm	ll	lm	ll	lm	ll
1952	LG8	M63665	158.747	lm	ll	ll	lm	lm	ll	--	ll	lm	--	ll	lm	ll	lm	lm	lm	ll	--	lm	ll	ll	lm	ll	ll	ll	--	--	ll	ll	ll	lm	ll	ll	--	ll	ll	ll	--	ll	lm	lm	ll	lm	ll	lm	ll
1953	LG9	M52199	0	nn	np	nn	nn	nn	np	nn	nn	np	nn	np	nn	np	--	nn	np	nn	--	nn	nn	np	nn	nn	--	np	nn	nn	nn	nn	np	np	np	nn	nn	np	nn	nn	nn	np	nn	nn	nn	nn	nn	nn	nn
1954	LG9	M71635	4.736	nn	np	nn	--	nn	--	nn	--	np	nn	np	nn	np	--	nn	np	nn	--	nn	nn	np	nn	nn	np	np	nn	np	nn	nn	--	--	np	np	nn	np	nn	np	np	np	nn	nn	nn	--	nn	nn	nn
1955	LG9	M62195	5.892	lm	ll	lm	lm	--	ll	lm	ll	ll	lm	ll	lm	ll	ll	lm	ll	lm	ll	ll	lm	lm	lm	lm	ll	lm	lm	lm	lm	lm	lm	ll	ll	lm	lm	ll	lm	lm	lm	ll	--	lm	ll	lm	ll	lm	lm
1956	LG9	M70905	8.359	nn	np	--	nn	nn	np	nn	np	np	--	np	nn	--	--	nn	np	nn	--	nn	nn	np	nn	nn	np	np	nn	--	nn	nn	nn	--	np	np	nn	np	nn	np	nn	np	nn	nn	nn	nn	nn	nn	nn
1957	LG9	M55813	10.146	nn	np	nn	--	nn	--	nn	nn	--	nn	np	nn	--	--	nn	np	nn	--	nn	nn	np	nn	nn	np	np	nn	--	nn	nn	--	--	--	nn	nn	--	nn	--	nn	np	nn	nn	nn	nn	--	nn	nn
1958	LG9	M52197	10.44	lm	ll	lm	lm	lm	ll	lm	ll	ll	ll	ll	lm	ll	ll	lm	ll	lm	--	lm	lm	lm	lm	--	ll	lm	ll	lm	ll	ll	lm	ll	ll	lm	lm	ll	lm	lm	lm	ll	lm	ll	lm	lm	lm	lm	lm
1959	LG9	M07291	13.019	nn	np	nn	nn	nn	np	nn	--	np	--	np	np	np	nn	nn	np	nn	np	nn	nn	np	nn	nn	np	np	nn	np	nn	nn	--	nn	np	--	nn	np	nn	nn	nn	np	nn	nn	nn	nn	np	nn	nn
1960	LG9	M54712	13.871	lm	ll	lm	lm	lm	ll	lm	ll	ll	lm	ll	lm	ll	ll	lm	ll	lm	ll	lm	lm	lm	lm	lm	ll	lm	lm	lm	lm	lm	lm	ll	ll	lm	lm	ll	lm	lm	lm	ll	lm	lm	lm	lm	ll	lm	lm
1961	LG9	M60339	15.727	hk	hk	kk	hk	kk	hh	kk	hh	hh	hk	hh	hk	hh	hh	hk	hh	hk	hh	hk	hk	hk	kk	hk	hh	hk	hk	hk	hk	k-	hk	hh	hh	hk	k-	hh	kk	hh	hk	hh	kk	--	hk	kk	hk	kk	hk
1962	LG9	M01420	16.546	lm	ll	lm	lm	lm	ll	lm	ll	lm	lm	ll	lm	ll	ll	lm	ll	lm	ll	ll	lm	lm	lm	lm	ll	lm	lm	lm	lm	lm	lm	ll	ll	lm	lm	ll	lm	--	lm	ll	lm	lm	lm	lm	ll	lm	lm
1963	LG9	M09787	16.812	nn	np	nn	nn	np	np	nn	np	np	nn	np	nn	np	--	nn	np	nn	np	np	nn	np	nn	nn	np	np	nn	np	nn	nn	np	np	np	np	nn	np	nn	np	nn	np	nn	nn	nn	nn	np	nn	nn
1964	LG9	M64956	17.544	nn	np	nn	nn	np	np	nn	--	np	nn	np	nn	np	--	nn	np	nn	np	np	nn	nn	nn	nn	np	np	nn	np	nn	nn	--	--	np	--	nn	np	nn	np	nn	np	nn	nn	nn	nn	np	nn	nn
1965	LG9	M56374	18.193	lm	ll	--	ll	lm	ll	ll	lm	lm	ll	lm	lm	lm	--	lm	lm	--	--	lm	lm	--	--	--	lm	lm	lm	lm	lm	lm	--	ll	lm	lm	ll	lm	--	ll	lm	lm	--	lm	ll	--	lm	lm	lm
1966	LG9	M56371	18.543	lm	ll	--	ll	lm	ll	ll	lm	lm	ll	lm	lm	lm	--	lm	lm	--	--	lm	lm	--	--	--	lm	lm	lm	lm	lm	lm	--	ll	lm	lm	ll	lm	--	ll	lm	lm	--	lm	ll	--	lm	lm	lm
1967	LG9	M55812	19.13	nn	np	nn	nn	--	np	--	np	np	np	np	np	np	np	nn	np	nn	--	nn	nn	np	nn	nn	np	np	np	np	np	--	np	np	np	np	--	np	--	np	nn	np	nn	nn	nn	nn	--	nn	nn
1968	LG9	M64959	19.754	hk	hk	hh	hk	hk	kk	hh	--	kk	kk	kk	kk	kk	kk	hk	kk	hk	kk	kk	hk	hh	hh	hk	kk	hk	hk	hk	hk	hk	--	--	kk	--	hh	kk	hh	hk	hk	kk	hh	hk	hk	hh	kk	hh	hk
1969	LG9	M64957	19.795	hk	hk	kk	hk	hk	hh	kk	--	hh	hh	hh	hh	hh	h-	hk	hh	hk	hh	hh	hk	kk	kk	hk	hh	hk	hk	hk	hk	hk	--	--	hh	--	kk	hh	kk	hk	hk	hh	kk	hk	hk	kk	hh	kk	hk
1970	LG9	M55378	21.984	lm	ll	ll	ll	ll	lm	ll	lm	lm	--	lm	lm	lm	--	lm	lm	lm	lm	lm	lm	ll	ll	lm	lm	ll	lm	ll	lm	lm	ll	lm	lm	ll	ll	lm	ll	ll	lm	lm	ll	lm	lm	ll	lm	ll	lm
1971	LG9	M50678	22.174	nn	np	--	nn	np	--	nn	--	np	nn	np	nn	--	nn	nn	np	nn	--	np	nn	np	nn	nn	np	np	nn	--	nn	nn	np	--	np	--	nn	--	nn	--	nn	np	nn	--	nn	nn	np	nn	nn
1972	LG9	M50679	22.179	nn	np	--	nn	np	--	nn	--	np	nn	np	nn	--	nn	nn	np	nn	--	np	nn	np	nn	nn	np	np	nn	--	nn	nn	np	--	np	--	nn	--	nn	--	nn	np	nn	--	nn	nn	np	nn	nn
1973	LG9	M50682	22.504	nn	np	--	nn	np	--	nn	--	np	nn	np	nn	--	nn	nn	np	nn	--	np	nn	np	nn	nn	np	np	nn	--	nn	nn	np	--	np	--	nn	--	nn	--	nn	np	nn	--	nn	nn	np	nn	nn
1974	LG9	M55383	23.091	lm	ll	ll	ll	ll	lm	ll	--	lm	--	lm	lm	lm	--	lm	lm	lm	lm	lm	lm	ll	ll	lm	lm	ll	lm	ll	lm	lm	ll	lm	lm	ll	ll	lm	ll	ll	lm	lm	ll	lm	lm	ll	lm	ll	lm
1975	LG9	M08753	24.373	lm	ll	ll	ll	ll	lm	ll	lm	ll	lm	lm	lm	lm	lm	lm	lm	lm	--	lm	lm	ll	ll	lm	lm	ll	lm	ll	lm	--	ll	lm	lm	ll	ll	lm	ll	ll	lm	lm	ll	lm	lm	ll	lm	ll	lm
1976	LG9	M72829	25.158	hk	hk	hh	hh	hh	hk	hk	kk	k-	hk	hk	hk	--	--	hk	hk	hh	--	hk	hk	hh	hh	hk	hk	hh	hk	hh	hk	hk	--	hk	kk	hh	hh	kk	hh	hh	k-	k-	h-	hk	hk	hk	hk	hh	hk
1977	LG9	M12310	26.107	nn	np	np	np	--	np	np	nn	np	--	nn	np	nn	nn	np	np	np	nn	nn	--	--	np	--	--	np	np	np	--	--	--	nn	nn	np	np	nn	np	np	np	nn	np	np	np	np	nn	np	np
1978	LG9	M06350	27.089	lm	ll	ll	--	ll	lm	ll	lm	lm	lm	lm	lm	lm	lm	lm	lm	lm	--	lm	lm	ll	ll	lm	lm	ll	lm	ll	lm	lm	ll	--	lm	ll	ll	lm	ll	--	lm	lm	ll	lm	lm	--	lm	ll	lm
1979	LG9	M69726	29.618	lm	ll	--	--	lm	ll	ll	lm	--	--	lm	lm	lm	--	lm	--	lm	lm	lm	lm	ll	ll	lm	lm	lm	lm	--	lm	lm	--	lm	lm	ll	lm	lm	lm	lm	lm	lm	--	lm	ll	ll	lm	ll	lm
1980	LG9	M72288	30.762	nn	np	nn	nn	np	nn	nn	nn	--	nn	--	np	np	np	nn	np	nn	np	np	np	np	nn	nn	nn	np	nn	np	np	nn	np	np	np	np	nn	--	nn	nn	nn	np	nn	nn	nn	nn	np	np	nn
1981	LG9	M05645	30.858	lm	ll	--	--	lm	ll	lm	lm	lm	ll	lm	lm	lm	--	ll	lm	--	lm	lm	--	lm	ll	ll	ll	lm	ll	lm	lm	--	--	--	lm	lm	ll	lm	ll	--	ll	lm	ll	ll	ll	lm	lm	--	--
1982	LG9	M72283	32.662	nn	np	nn	nn	--	nn	nn	nn	nn	nn	--	np	--	np	nn	np	nn	np	--	--	np	nn	nn	nn	--	nn	np	--	nn	np	np	np	np	nn	--	nn	nn	nn	np	nn	nn	nn	nn	--	--	nn
1983	LG9	M72286	32.708	nn	np	nn	nn	--	nn	nn	nn	--	nn	--	np	--	np	nn	np	nn	np	--	--	np	nn	nn	nn	--	nn	np	--	nn	np	np	np	np	nn	--	nn	nn	nn	np	nn	nn	nn	nn	--	--	nn
1984	LG9	M72287	33.084	nn	np	nn	nn	--	nn	nn	nn	--	nn	--	np	--	np	nn	np	nn	np	--	--	np	nn	nn	nn	--	nn	np	--	nn	np	np	np	np	nn	--	nn	nn	nn	np	nn	nn	nn	nn	--	--	nn
1985	LG9	M65703	34.861	nn	np	nn	nn	--	nn	nn	nn	--	nn	np	np	--	nn	nn	--	nn	--	nn	np	--	nn	nn	nn	--	nn	np	np	nn	np	--	np	np	nn	nn	nn	nn	nn	np	nn	nn	nn	nn	nn	np	nn
1986	LG9	M55348	36.239	lm	ll	--	ll	ll	ll	ll	lm	ll	ll	lm	lm	--	--	lm	ll	ll	--	lm	lm	ll	ll	--	--	ll	lm	ll	--	--	--	--	lm	ll	ll	lm	ll	ll	--	lm	ll	lm	ll	ll	lm	ll	--
1987	LG9	M55352	36.265	lm	ll	--	ll	ll	ll	ll	lm	ll	ll	lm	lm	--	--	lm	ll	ll	--	lm	lm	ll	ll	--	--	ll	lm	ll	--	--	--	--	lm	ll	ll	lm	ll	ll	--	lm	ll	lm	ll	ll	lm	ll	--
1988	LG9	M66326	36.362	nn	np	--	nn	np	np	np	np	np	np	np	np	np	np	--	nn	np	nn	nn	nn	--	np	--	nn	nn	np	np	np	np	np	--	np	np	np	np	np	np	nn	np	--	--	nn	--	nn	--	nn
1989	LG9	M71522	36.576	nn	np	nn	nn	np	nn	nn	--	np	--	np	np	np	--	nn	np	nn	--	np	np	np	nn	--	nn	np	nn	--	np	np	nn	np	np	--	nn	np	nn	--	nn	np	--	nn	nn	nn	np	np	nn
1990	LG9	M69865	37.139	lm	ll	lm	ll	ll	ll	ll	--	ll	ll	lm	lm	lm	--	lm	ll	--	lm	lm	lm	ll	ll	lm	--	ll	lm	ll	--	lm	--	--	lm	ll	ll	--	ll	ll	lm	lm	ll	--	ll	--	lm	ll	lm
1991	LG9	M51171	37.817	nn	np	nn	nn	np	--	--	np	np	--	np	np	np	--	nn	np	--	--	np	np	--	nn	--	nn	np	nn	--	np	np	--	np	np	nn	nn	np	--	--	--	np	nn	nn	nn	--	np	--	nn
1992	LG9	M51172	38.31	nn	np	nn	np	np	--	--	np	np	--	np	np	np	--	nn	np	--	--	np	np	--	nn	--	nn	np	nn	--	np	np	--	np	np	nn	nn	np	--	--	--	np	nn	nn	nn	--	np	--	nn
1993	LG9	M04622	39.103	lm	ll	--	ll	ll	--	ll	lm	ll	--	lm	lm	lm	lm	lm	ll	lm	--	lm	lm	ll	ll	lm	lm	ll	lm	ll	lm	lm	ll	lm	lm	ll	ll	--	ll	ll	lm	lm	ll	lm	ll	ll	lm	ll	lm
1994	LG9	cms13414	40.071	hk	hk	hk	hk	hk	kk	kk	hh	hk	kk	hh	hh	hh	hk	hk	hk	hk	hh	hh	hh	hk	kk	hk	hk	hk	hk	hk	--	hh	hk	hh	hh	hk	kk	--	--	kk	hk	--	--	hk	--	kk	hh	hk	hk
1995	LG9	M68559	40.345	lm	ll	lm	ll	ll	--	--	lm	ll	--	lm	lm	lm	lm	lm	ll	lm	--	lm	lm	ll	ll	--	lm	ll	lm	ll	lm	lm	ll	--	lm	ll	ll	lm	ll	--	--	lm	ll	lm	ll	ll	lm	ll	lm
1996	LG9	M68642	40.825	nn	np	nn	nn	np	nn	nn	--	--	nn	--	np	--	nn	nn	np	nn	--	np	np	np	nn	nn	nn	--	nn	np	--	nn	--	--	--	np	nn	--	nn	nn	nn	np	nn	nn	nn	nn	--	np	nn
1997	LG9	M62304	41.506	lm	ll	lm	ll	ll	ll	ll	lm	ll	ll	lm	--	lm	lm	lm	ll	lm	--	lm	lm	ll	ll	lm	lm	ll	lm	ll	lm	lm	--	--	lm	ll	ll	lm	ll	ll	lm	lm	ll	lm	ll	ll	lm	ll	lm
1998	LG9	M59034	41.628	nn	np	np	np	nn	--	nn	np	--	nn	np	np	np	np	nn	--	np	np	np	np	np	np	np	nn	nn	np	nn	nn	np	--	np	np	--	nn	np	nn	nn	np	np	nn	np	nn	nn	np	nn	np
[truncated: 1,747 more rows]
[truncated: 136 more columns]
